# Supplementary material
Source: PubMed Central journal article supplement (PMC5608106)

## Supporting Information for

### Conversion of Methyl Ketones and Methyl Sulfones into $\alpha$ -Deutero- $\alpha,\alpha$ -Difluoromethyl Ketones and $\alpha$ -Deutero- $\alpha,\alpha$ -Difluoromethyl Sulfones in Three Synthetic Steps

Munia F. Sowaileh<sup>a</sup>, Changho Han<sup>b</sup>, Robert A. Hazlitt<sup>a</sup>, Eun Hoo Kim<sup>c</sup>, Jinu P. John<sup>d</sup> and David A. Colby<sup>a,\*</sup>

<sup>a</sup> Department of BioMolecular Sciences, University of Mississippi, University, Mississippi, 38677, USA

<sup>b</sup> Department of Biochemistry, Vanderbilt University, Nashville, Tennessee, 37232, USA

<sup>c</sup> Department of Chemistry and Physical Sciences, Methodist University, Fayetteville, North Carolina, 28311, USA

<sup>d</sup> DSM Chemicals, Frankfort, Indiana, 46401, USA

#### Table of Contents:

|                                                   |     |
|---------------------------------------------------|-----|
| Experimental Procedures and Characterization Data | S1  |
| References                                        | S14 |
| Spectral Data                                     | S15 |

#### Experimental Procedures and Characterization Data

**Representative Reaction Procedure for Preparation of  $\alpha,\alpha$ -Difluoromethyl Ketones.** A solution of 2,2,4,4,4-pentafluoro-3,3-dihydroxy-1-(naphthalen-2-yl)butan-1-one **4**<sup>1</sup> (73 mg, 0.23 mmol) in H<sub>2</sub>O/THF (2 mL/0.5 mL) was treated with Et<sub>3</sub>N (130  $\mu$ L, 0.91 mmol), and the resultant mixture was stirred for 10 min at rt. The organics were extracted with CH<sub>2</sub>Cl<sub>2</sub> (3  $\times$  5 mL), dried over Na<sub>2</sub>SO<sub>4</sub>, and concentrated under reduced pressure. SiO<sub>2</sub> flash chromatography (CHCl<sub>3</sub>) afforded the product **15** as a colorless solid (45 mg) in 96% yield.<sup>2</sup>

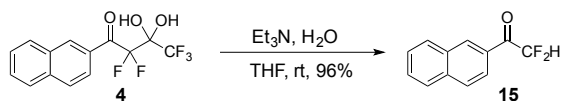

**2,2-Difluoro-1-(naphthalen-2-yl)ethanone 15.** See representative reaction procedure. All spectral and characterization data matched the reported data.<sup>3</sup>

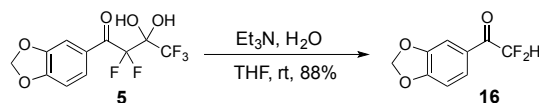

**1-(Benzo[*d*][1,3]dioxol-5-yl)-2,2-difluoroethanone 16.** See representative reaction procedure. 1-(Benzo[*d*][1,3]dioxol-5-yl)-2,2,4,4,4-pentafluoro-3,3-dihydroxybutan-1-one **5**<sup>1</sup> (80 mg, 0.26 mmol), Et<sub>3</sub>N (140  $\mu$ L, 0.73 mmol), and H<sub>2</sub>O/THF (2 mL/0.5 mL) were used. The title compound **16** was isolated as a colorless solid (45 mg) in 88% yield: mp 61–62 °C; <sup>1</sup>H NMR (500 MHz, CDCl<sub>3</sub>)  $\delta$  7.70 (ddt, *J* = 8.3, 1.8, 1.0 Hz, 1H), 7.49 (d, *J* = 1.5 Hz, 1H), 6.90 (d, *J* = 8.4 Hz, 1H), 6.24 (t, *J* = 53.6 Hz, 1H), 6.08 (s, 2H); <sup>13</sup>C NMR (125 MHz, CDCl<sub>3</sub>)  $\delta$  185.6 (t, *J* = 25.1 Hz, 1C),

153.4, 148.5, 126.8, 126.0, 111.3 (t,  $J = 253$  Hz, 1C), 108.8, 108.4, 102.2;  $^{19}\text{F}$  NMR (282 MHz,  $\text{CDCl}_3$ )  $\delta -122.1$  (d,  $J = 53.3$  Hz, 2F); IR (film)  $\nu_{\text{max}}$  1694, 1451, 1259, 1036  $\text{cm}^{-1}$ ; HRMS (EI)  $m/z$  calcd for  $\text{C}_9\text{H}_6\text{F}_2\text{O}_3$  ( $\text{M}$ ) $^+$  200.0285, found 200.0286.<sup>2</sup>

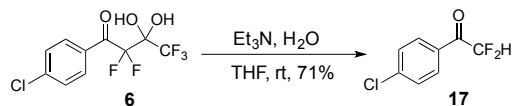

**1-(4-Chlorophenyl)-2,2-difluoroethanone 17.** See representative reaction procedure. 1-(4-Chlorophenyl)-2,2,4,4,4-pentafluoro-3,3-dihydroxybutan-1-one **6**<sup>1</sup> (100 mg, 0.33 mmol),  $\text{Et}_3\text{N}$  (185  $\mu\text{L}$ , 1.31 mmol), and  $\text{H}_2\text{O}/\text{THF}$  (2 mL/0.5 mL) were used. The title compound **17** was isolated as a colorless oil (45 mg) in 71% yield.<sup>2</sup> All spectral and characterization data matched the reported data.<sup>3</sup>

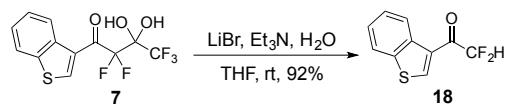

**1-(Benzothiophen-3-yl)-2,2-difluoroethanone 18.** See representative reaction procedure. 1-(Benzothiophen-3-yl)-2,2,4,4,4-pentafluoro-3,3-dihydroxybutan-1-one **7**<sup>4</sup> (25 mg, 0.08 mmol), LiBr (40 mg, 0.46 mmol), and  $\text{Et}_3\text{N}$  (21  $\mu\text{L}$ , 0.15 mmol) were used.  $\text{SiO}_2$  flash chromatography (17:3 hexanes/ $\text{Et}_2\text{O}$ ) afforded the title compound **18** as a colorless oil (15 mg) in 93% yield:  $^1\text{H}$  NMR (500 MHz,  $\text{CDCl}_3$ )  $\delta$  8.78–8.73 (m, 1H), 8.69 (t,  $J = 1.5$  Hz, 1H), 7.95–7.89 (m, 1H), 7.55 (m, 1H), 7.48 (m, 1H), 6.22 (t,  $J = 53.8$  Hz, 1H);  $^{13}\text{C}$  NMR (125 MHz,  $\text{CDCl}_3$ )  $\delta$  182.4 (t,  $J = 25.4$  Hz, 1C), 141.4 (t,  $J = 6.1$  Hz, 1C), 139.0, 136.6, 128.6, 126.4, 126.0, 125.1, 122.2, 111.6 (t,  $J = 255$  Hz, 1C);  $^{19}\text{F}$  NMR (282 MHz,  $\text{CDCl}_3$ )  $\delta -121.1$  (d,  $J_{\text{HF}} = 53.8$  Hz, 2F); IR (film)  $\nu_{\text{max}}$  1679, 1491, 1462, 1424, 1135, 1109, 1055  $\text{cm}^{-1}$ ; HRMS (CI)  $m/z$  calcd for  $\text{C}_{10}\text{H}_6\text{F}_2\text{OS}$  ( $\text{M}$ ) $^+$  212.0107, found 212.0109.

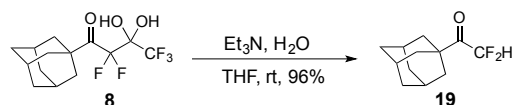

**1-(Adamantan-1-yl)-2,2-difluoroethanone 19.** See representative reaction procedure. 1-(Adamantan-1-yl)-2,2,4,4,4-pentafluoro-3,3-dihydroxybutan-1-one **8**<sup>1</sup> (47 mg, 0.14 mmol),  $\text{Et}_3\text{N}$  (80.0  $\mu\text{L}$ , 0.57 mmol),  $\text{H}_2\text{O}/\text{THF}$  (2 ml/0.5 ml) were used. The reaction mixture was stirred for 1 h at rt. The title compound **19** was isolated in 96% yield (30 mg) as a colorless oil.<sup>2</sup> All spectral and characterization data matched the reported data.<sup>5</sup>

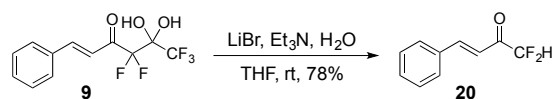

**(E)-1,1-Difluoro-4-phenylbut-3-en-2-one 20.** See representative reaction procedure. (*E*)-4,4,6,6,6-Pentafluoro-5,5-dihydroxy-1-phenylhex-1-en-3-one **9**<sup>4</sup> (50 mg, 0.17 mmol), LiBr (87 mg, 1.01 mmol),  $\text{Et}_3\text{N}$  (50  $\mu\text{L}$ , 0.4 mmol), and  $\text{H}_2\text{O}/\text{THF}$  (1.7 ml/1.7 ml) were used. The reaction mixture was stirred for 30 min at rt.  $\text{SiO}_2$  flash chromatography (1:3  $\text{Et}_2\text{O}/\text{Hexanes}$ ) afforded the title compound **20** in 78% yield (24 mg) as a colorless oil. All spectral and characterization data matched the reported data.<sup>3</sup>

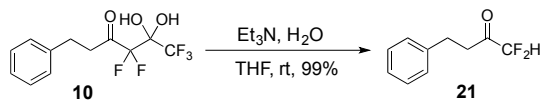

**1,1-Difluoro-4-phenylbutan-2-one 21.** See representative reaction procedure. 4,4,6,6,6-Pentafluoro-5,5-dihydroxy-1-phenylhexan-3-one **10**<sup>4</sup> (35.7 mg, 0.120 mmol), Et<sub>3</sub>N (67  $\mu$ L, 0.48 mmol), and H<sub>2</sub>O/THF (1.5 mL/1.5 mL) were used. The title compound **21** was isolated as a colorless oil in 99% yield (22 mg). All spectral and characterization data matched the reported data.<sup>6</sup>

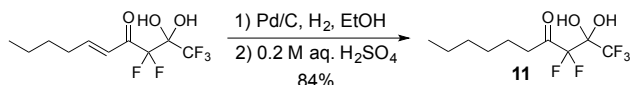

**1,1,1,3,3-Pentafluoro-2,2-dihydroxydecan-4-one 11.** To a solution of 1,1,1,3,3-pentafluoro-2,2-dihydroxydec-5-en-4-one<sup>1</sup> (500 mg, 1.8 mmol) in EtOH (15 mL) was added Pd/C (28.7 mg, 0.243 mmol), and the mixture was stirred under a H<sub>2</sub> atmosphere for 24 h at rt. Next, the mixture was diluted with CH<sub>2</sub>Cl<sub>2</sub> (5 mL), filtered through Celite, and concentrated under reduced pressure. The residue was dissolved in 1:1 THF/0.2 M aqueous H<sub>2</sub>SO<sub>4</sub> (10 mL) and stirred for 16 h at rt. SiO<sub>2</sub> flash chromatography (9:1 hexanes/EtOAc) afforded the desired product **11** as a colorless oil in 83% yield (418 mg): <sup>1</sup>H NMR (300 MHz, CDCl<sub>3</sub>)  $\delta$  4.62 (br s, 2H), 2.82 (t, *J* = 4.5 Hz, 2H), 1.64 (m, 2H), 1.30 (m, 6H), 0.89 (t, *J* = 4.5 Hz, 3H); <sup>13</sup>C NMR (125 MHz, CDCl<sub>3</sub>)  $\delta$  204.0 (t, *J* = 27.5 Hz, 1C), 120.6 (q, *J* = 288 Hz, 1C), 109.5 (t, *J* = 266 Hz, 1C), 92.4 (m, 1C), 37.9, 31.4, 28.3, 22.4, 22.1, 13.9; <sup>19</sup>F NMR (282 MHz, CDCl<sub>3</sub>)  $\delta$  -82.87 (t, *J* = 11.3 Hz, 3F), -121.44 (q, *J* = 11.3 Hz, 2F); IR (film)  $\nu_{\max}$  3424, 2963, 2933, 2887, 1710, 1200, 1178, 1071 cm<sup>-1</sup>; HRMS (EI) *m/z* calcd for C<sub>10</sub>H<sub>14</sub>F<sub>5</sub>O<sub>2</sub> (M+H-H<sub>2</sub>O)<sup>+</sup> 261.0914, found 261.0917.

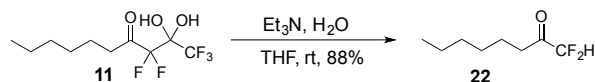

**1,1-Difluoro-octan-2-one 22.** See representative reaction procedure. 1,1,1,3,3-Pentafluoro-2,2-dihydroxydecan-4-one **11** (44.8 mg, 0.161 mmol), Et<sub>3</sub>N (91  $\mu$ L, 0.64 mmol), and H<sub>2</sub>O/THF (1.6 mL/1.5 mL) were used. The title compound **22** was isolated as a colorless oil in 88% yield (23 mg). All spectral and characterization data matched the reported data.<sup>6</sup>

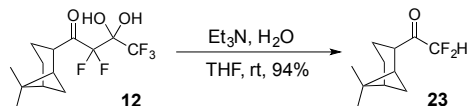

**2,2-Difluoro-1-(6,6-dimethylbicyclo[3.1.1]heptan-2-yl)ethanone 23.** See representative reaction procedure. 1-((1*S*,2*S*,5*S*)-6,6-Dimethylbicyclo[3.1.1]heptan-2-yl)-2,2,4,4,4-pentafluoro-3,3-dihydroxybutan-1-one **12**<sup>1</sup> (49.1 mg, 0.155 mmol), Et<sub>3</sub>N (87  $\mu$ L, 0.62 mmol), and H<sub>2</sub>O/THF (1.5 mL/0.3 mL) were used. The title compound **23** was isolated as a colorless oil in 94% yield (30 mg): <sup>1</sup>H NMR (500 MHz, CDCl<sub>3</sub>)  $\delta$  5.76 (t, *J* = 53.8 Hz, 1H), 3.43 (t, *J* = 8.6 Hz, 1H), 2.13 (m, 3H), 1.91 (m, 3H), 1.62 (m, 1H), 1.42 (d, *J* = 10.4 Hz, 1H), 1.25 (s, 3H), 0.92 (s, 3H); <sup>13</sup>C NMR (125 MHz, CDCl<sub>3</sub>)  $\delta$  201.44 (t, *J* = 23.8 Hz, 1C), 109.90 (t, *J* = 254 Hz, 1C), 43.1, 42.0, 39.9, 39.4, 26.4, 23.6, 23.4, 20.3, 14.4; <sup>19</sup>F NMR (282 MHz, CDCl<sub>3</sub>)  $\delta$  -126.8 (dd, *J* = 318, 53.8 Hz, 1F), -128.4 (dd, *J* = 318, 53.8 Hz, 1F); IR (film)  $\nu_{\max}$  2974, 2950, 2918, 1718, 1123, 1077,

958  $\text{cm}^{-1}$ ; HRMS (EI)  $m/z$  calcd for  $\text{C}_{11}\text{H}_{16}\text{F}_2\text{O}$  ( $\text{M}$ )<sup>+</sup> 202.1169, found 202.1168;  $[\alpha]_{\text{D}}^{26} +36^\circ$  ( $c$  1.2,  $\text{CHCl}_3$ ).

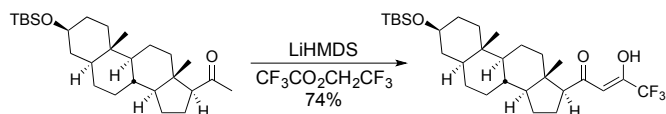

**3-(*tert*-Butyldimethylsilyl)-21-(trifluoroacetyl)pregnenolone.** To  $-78^\circ\text{C}$  solution of *n*-BuLi (120  $\mu\text{L}$ , 1.56 M in hexanes) in THF (6 mL) was added hexamethyldisilazane (303 mg, 1.88 mmol) dropwise. The mixture was stirred at  $-78^\circ\text{C}$  for 20 min, and then, 3-(*tert*-butyldimethylsilyl)pregnenolone<sup>7</sup> (678 mg, 1.57 mmol) was added. The resultant mixture was stirred for 45 min at  $-78^\circ\text{C}$ . Next, 2,2,2-trifluoroethyl 2,2,2-trifluoroacetate (461 mg, 2.35 mmol) was added dropwise and the mixture was stirred for 15 min at  $-78^\circ\text{C}$ . The reaction mixture was quenched with 1 M aqueous  $\text{H}_2\text{SO}_4$  (10 mL) and stirred for 10 min. The resultant mixture was extracted with  $\text{CH}_2\text{Cl}_2$  (10 mL  $\times$  3), and the organics were dried over  $\text{Na}_2\text{SO}_4$ . Concentration under reduced pressure afforded the title compound in 74% yield (610 mg) as a solid: mp  $96\text{--}98^\circ\text{C}$ ;  $^1\text{H}$  NMR (500 MHz,  $\text{CDCl}_3$ )  $\delta$  5.86 (s, 1H), 3.55 (tt,  $J = 10.8, 4.7$  Hz, 1H), 2.43 (t,  $J = 9.0$  Hz, 1H), 2.18–2.07 (m, 1H), 1.89 (dd,  $J = 8.2, 2.6$  Hz, 1H), 1.82–1.72 (m, 2H), 1.71–1.63 (m, 3H), 1.62–1.56 (m, 1H), 1.49–1.41 (m, 2H), 1.38 (dt,  $J = 18.3, 4.9$  Hz, 1H), 1.35–1.22 (m, 7H), 1.20–1.13 (m, 1H), 1.07 (m, 1H), 0.98–0.91 (m, 3H), 0.88 (s, 9H), 0.80 (s, 3H), 0.65 (s, 3H), 0.05 (s, 6H);  $^{13}\text{C}$  NMR (125 MHz,  $\text{CDCl}_3$ )  $\delta$  198.6, 174.8 (q,  $J = 36.0$  Hz, 1C), 117.2 (q,  $J = 218.3$  Hz, 1C), 96.4, 72.0, 59.3, 56.7, 54.3, 46.5, 45.0, 38.6, 38.5, 37.1, 35.7, 35.6, 32.1, 31.9, 28.6, 26.0 (3), 24.4, 22.8, 21.1, 18.3, 13.4, 12.4,  $-4.6$  (2);  $^{19}\text{F}$  NMR (282 MHz,  $\text{CDCl}_3$ )  $\delta$   $-75.8$  (s, 3F); IR (film)  $\nu_{\text{max}}$  2930, 2855, 1593, 1200, 1157, 1107, 1090, 836  $\text{cm}^{-1}$ ; HRMS (ESI)  $m/z$  calcd for  $\text{C}_{29}\text{H}_{47}\text{F}_3\text{O}_3\text{SiNa}$  ( $\text{M}+\text{Na}$ )<sup>+</sup> 551.3144, found 551.3149;  $[\alpha]_{\text{D}}^{23} +70^\circ$  ( $c$  1.03,  $\text{CHCl}_3$ ).

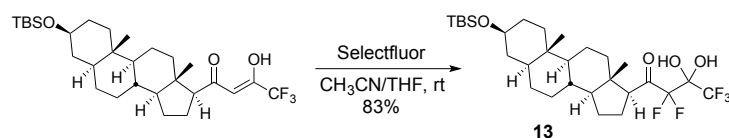

**3-(*tert*-Butyldimethylsilyl)-21,21-difluoro-21-(2,2,2-trifluoro-1,1-dihydroxyethyl)pregnenolone 13.** A solution of 3-(*tert*-butyldimethylsilyl)-21-(trifluoroacetyl)pregnenolone (277 mg, 0.52 mmol) in  $\text{CH}_3\text{CN}$  (2 mL) and THF (2 mL) was treated with Selectfluor (464 mg, 1.31 mmol). After 24 h, Selectfluor (300 mg, 0.98 mmol) was added and the mixture was stirred for an additional 24 h. Next, the reaction was diluted with EtOAc (50 mL) and filtered through Celite. The residue was concentrated *in vacuo*, dissolved in  $\text{CH}_2\text{Cl}_2$  (20 mL), and washed with water (20 mL). The aqueous layer was extracted with  $\text{CH}_2\text{Cl}_2$  (20 mL). The combined organics were dried over  $\text{Na}_2\text{SO}_4$  and concentrated under reduced pressure to give the title compound **13** in 83% yield (252 mg) as a solid: mp  $108\text{--}111^\circ\text{C}$ ;  $^1\text{H}$  NMR (500 MHz,  $\text{CDCl}_3$ )  $\delta$  4.68 (br s, 2H), 3.55 (tt,  $J = 10.8, 4.8$  Hz, 1H), 3.18 (t,  $J = 8.8$  Hz, 1H), 2.18–2.09 (m, 1H), 1.93 (d,  $J = 12.3$  Hz, 1H), 1.84–1.71 (m, 2H), 1.71–1.63 (m, 3H), 1.58 (dt,  $J = 9.7, 3.1$  Hz, 1H), 1.48–1.23 (m, 11H), 1.07 (m, 1H), 0.99–0.90 (m, 2H), 0.88 (s, 9H), 0.80 (s, 3H), 0.70 (s, 3H), 0.05 (s, 6H);  $^{13}\text{C}$  NMR (125 MHz,  $\text{CDCl}_3$ )  $\delta$  207.0 (t,  $J = 28.6$  Hz, 1C), 120.9 (q,  $J = 283.3$  Hz, 1C), 108.5 (t,  $J = 266$  Hz, 1C), 92.8 (qt,  $J = 29.8, 1.0$  Hz, 1C), 72.1, 57.3 (2), 54.0, 48.3, 44.9, 38.5, 38.3, 37.1, 35.8, 35.5, 32.1, 31.8, 28.6, 25.9 (3), 24.6, 24.4, 21.2, 18.3, 13.7, 12.3,  $-4.6$  (2);  $^{19}\text{F}$  NMR (282 MHz,

CDCl<sub>3</sub>)  $\delta$  -80.8 (t,  $J$  = 8.0 Hz, 3F), -119.5 (dq,  $J$  = 116, 8.4 Hz, 2F); IR (film)  $\nu_{\max}$  3436, 2931, 2858, 1717, 1386, 1209, 1087, 837, 775 cm<sup>-1</sup>; HRMS (ESI)  $m/z$  calcd for C<sub>29</sub>H<sub>44</sub>F<sub>5</sub>O<sub>3</sub>Si (M-H-H<sub>2</sub>O)<sup>-</sup> 563.2980, found 563.2973;  $[\alpha]_D^{26}$  +83° ( $c$  2.08, CHCl<sub>3</sub>).

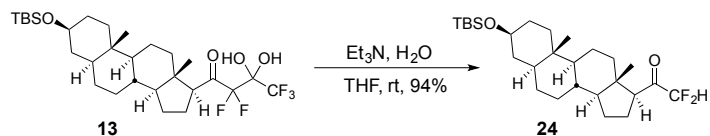

**3-(*tert*-Butyldimethylsilyl)-21,21-difluoropregnenolone 24.** See representative reaction procedure. 3-(*tert*-Butyldimethylsilyl)-21,21-difluoro-21-(2,2,2-trifluoro-1,1-dihydroxyethyl)-pregnenolone **13** (30 mg, 0.05 mmol), Et<sub>3</sub>N (29  $\mu$ L, 0.21 mmol), H<sub>2</sub>O/THF (500  $\mu$ L/100  $\mu$ L) were used. The reaction mixture was stirred for 1 h at rt. The title compound **24** was isolated as a solid in 94% yield (23 mg): mp 116–118 °C; <sup>1</sup>H NMR (500 MHz, CDCl<sub>3</sub>)  $\delta$  5.63 (t,  $J$  = 54.2 Hz, 1H), 3.55 (ddd,  $J$  = 15.7, 10.8, 4.8 Hz, 1H), 2.94 (t,  $J$  = 8.9 Hz, 1H), 2.17 (m, 1H), 1.88 (d,  $J$  = 12.7 Hz, 1H), 1.80–1.63 (m, 5H), 1.58 (dq,  $J$  = 13.6, 3.9 Hz, 1H), 1.49–1.17 (m, 11H), 1.13–1.02 (m, 1H), 0.94 (ddd,  $J$  = 27.5, 14.0, 4.5 Hz, 2H), 0.88 (s, 9H), 0.79 (s, 3H), 0.67 (s, 3H), 0.05 (s, 6H); <sup>13</sup>C NMR (125 MHz, CDCl<sub>3</sub>)  $\delta$  201.3 (t,  $J$  = 24.9 Hz, 1C), 109.9 (t,  $J$  = 251 Hz, 1C), 72.1, 57.0, 56.9, 54.2, 46.4, 45.0, 38.6 (2), 37.2, 35.7, 35.5, 32.1, 31.9, 28.6, 26.0 (3), 24.6, 23.6, 21.2, 18.3, 13.9, 12.3, -4.6 (2); <sup>19</sup>F NMR (282 MHz, CDCl<sub>3</sub>)  $\delta$  -128.4 (d,  $J_{\text{HF}}$  = 54.1 Hz, 2F); IR (film)  $\nu_{\max}$  2931, 1732, 1252, 1091 cm<sup>-1</sup>; HRMS (EI)  $m/z$  calcd for C<sub>26</sub>H<sub>43</sub>F<sub>2</sub>O<sub>2</sub>Si (M-CH<sub>3</sub>)<sup>+</sup> 453.3000, found 453.2994;  $[\alpha]_D^{23}$  +77° ( $c$  0.16, CHCl<sub>3</sub>).

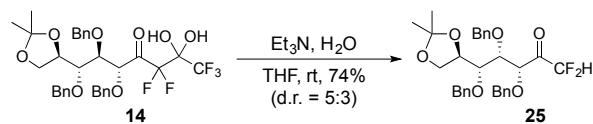

**(4*S*,5*R*)-3,4,5-Tris(benzyloxy)-5-((*R*)-2,2-dimethyl-1,3-dioxolan-4-yl)-1,1-difluoropentan-2-one 25.** To a solution of (5*R*,6*S*,7*R*)-5,6,7-tris(benzyloxy)-7-((*R*)-2,2-dimethyl-1,3-dioxolan-4-yl)-1,1,1,3,3-pentafluoro-2,2-dihydroxyheptan-4-one **14**<sup>8</sup> (65 mg, 0.10 mmol) in H<sub>2</sub>O/THF (1.5 mL/1.5 mL) was added LiBr (26 mg, 0.30 mmol), followed by Et<sub>3</sub>N (55  $\mu$ L, 0.40 mmol), and the resultant mixture was stirred for 15 min at rt. The organics were extracted with CH<sub>2</sub>Cl<sub>2</sub> (3  $\times$  5 mL), dried over Na<sub>2</sub>SO<sub>4</sub>, and concentrated under reduced pressure to afford the title compound **25** (40 mg, colorless oil) as an inseparable mixture of diastereomers (d.r. = 5:3) in 74% yield: <sup>1</sup>H NMR (400 MHz, (CD<sub>3</sub>)<sub>2</sub>CO)  $\delta$  7.51–7.23 (m, 15H), 6.29\* (t,  $J$  = 54.1 Hz, 1H), 6.28 (dd,  $J$  = 53.9, 52.8 Hz, 1H), 4.85 (dd,  $J$  = 13.6, 11.2 Hz, 1H), 4.75–4.55 (m, 5H), 4.37–4.12 (m, 3H), 4.05–3.90 (m, 3H), 1.35\* (s, 3H), 1.33 (s, 3H), 1.26 (s, 3H); <sup>13</sup>C NMR (100 MHz, (CD<sub>3</sub>)<sub>2</sub>CO)  $\delta$  198.3\* (dd,  $J$  = 23.5, 21.5 Hz, 1C), 195.7 (dd,  $J$  = 25, 20 Hz, 1C), 139.3\*, 138.9, 138.8\*, 138.7, 138.4\*, 138.3, 129.5\* (2C), 129.5 (2C), 129.4\* (2C), 129.4 (2C), 129.3, 129.2\* (2C), 129.2\* (2C), 129.1, 129.1 (2C), 129.0\*, 129.0 (2C), 128.9\* (2C), 128.9\* (2C), 128.8 (2C), 128.8 (2C), 128.7\*, 128.6\*, 128.5, 111.0\* (dd,  $J$  = 251, 240 Hz, 1C), 109.7 (t,  $J$  = 247 Hz, 1C), 109.3\*, 108.6, 82.6, 82.4\*, 82.1, 80.2\*, 78.6\*, 78.0, 77.8, 76.8\*, 75.2\*, 75.0\*, 74.6, 74.3, 74.0\*, 73.8, 67.1\*, 66.6, 26.9\*, 26.8, 25.3\*, 25.2; <sup>19</sup>F NMR (376 MHz, (CD<sub>3</sub>)<sub>2</sub>CO)  $\delta$  -126.1 (dd,  $J$  = 299, 52.3 Hz, 1F), -130.2\* (ddd,  $J$  = 310, 53.0, 2.2 Hz, 1F), -132.8\* (dd,  $J$  = 310, 53.7 Hz, 1F), -134.5 (ddd,  $J$  = 299, 56.0, 1.5 Hz, 1F); IR (film)  $\nu_{\max}$  3028, 2988, 2869, 1752, 1498, 1455, 1380, 1374, 1209, 1156, 1058 cm<sup>-1</sup>; HRMS (ESI)  $m/z$  calcd for C<sub>31</sub>H<sub>34</sub>F<sub>2</sub>O<sub>6</sub>Na (M+Na)<sup>+</sup> 563.2221, found 563.2210. \*denotes minor diastereomer.

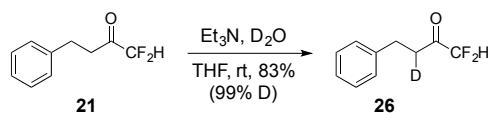

**1,1-Difluoro-3-deutero-4-phenylbutan-2-one 26.** To a solution of 1,1-difluoro-4-phenylbutan-2-one **21** (40.0 mg, 0.217 mmol) in D<sub>2</sub>O/THF (2.1 mL/0.7 mL) was added Et<sub>3</sub>N (122 μL, 0.869 mmol) dropwise. After 24 h, the reaction was extracted with CH<sub>2</sub>Cl<sub>2</sub> (2.5 mL × 2). The organics were dried over Na<sub>2</sub>SO<sub>4</sub> and concentrated under reduced pressure. SiO<sub>2</sub> flash chromatography (CHCl<sub>3</sub>) afforded the title compound **26** as a colorless solid (34 mg) in 83% yield: <sup>1</sup>H NMR (500 MHz, CDCl<sub>3</sub>) δ 7.34–7.28 (m, 2H), 7.25–7.18 (m, 3H), 5.68 (tt, *J* = 54.0, 0.9 Hz, 1H), 3.05–2.93 (m, 3H); <sup>13</sup>C NMR (125 MHz, CDCl<sub>3</sub>) δ 198.9 (tt, *J* = 26.5, 7.5 Hz, 1C), 139.8, 128.6 (2C), 128.3 (2C), 126.5, 109.8 (t, *J* = 251 Hz, 1C), 37.4 (t, *J* = 20.0 Hz, 1C), 28.21 (t, *J* = 6.3 Hz, 1C); <sup>19</sup>F NMR (282 MHz, CDCl<sub>3</sub>) δ –127.9 (dt, *J* = 53.9, 9.4 Hz, 2F); IR (film) ν<sub>max</sub> 3066, 3031, 2930, 1747, 1497, 1456, 1162, 1110, 955 cm<sup>-1</sup>; HRMS (EI) *m/z* calcd for C<sub>10</sub>H<sub>9</sub>DF<sub>2</sub>O (M)<sup>+</sup> 185.0762, found 185.0732.

**Representative Reaction Procedure for α-Deutero-α,α-difluoromethyl Ketone.** To a solution of 2,2,4,4,4-pentafluoro-3,3-dihydroxy-1-(naphthalen-2-yl)butan-1-one **4**<sup>1</sup> (100 mg, 0.31 mmol) in D<sub>2</sub>O/THF (2 mL/0.5 mL) was added Et<sub>3</sub>N (175 μL, 1.25 mmol), and the resultant mixture was stirred for 15 min at rt. The organics were extracted with CH<sub>2</sub>Cl<sub>2</sub> (3 × 5 mL), dried over Na<sub>2</sub>SO<sub>4</sub>, and concentrated under reduced pressure. SiO<sub>2</sub> flash chromatography (100% CHCl<sub>3</sub>) afforded the product **27** as a colorless solid (58 mg) in 89% yield (98% deuterium incorporation).

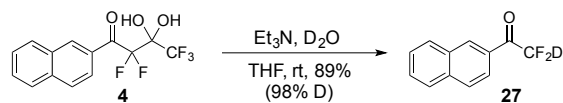

**2-Deutero-2,2-difluoro-1-(naphthalen-2-yl)ethanone 27.** See representative reaction procedure: mp 58–60 °C; <sup>1</sup>H NMR (300 MHz, CDCl<sub>3</sub>) δ 8.64 (s, 1H), 8.07 (m, 1H), 8.00 (m, 1H), 7.96–7.86 (m, 2H), 7.67 (m, 1H), 7.60 (m, 1H); <sup>13</sup>C NMR (75 MHz, CDCl<sub>3</sub>) δ 187.5 (t, *J* = 24.8 Hz, 1C), 136.2, 132.4, 132.2, 130.0, 129.6, 128.9, 128.7, 127.8, 127.2, 124.0, 110.9 (tt, *J* = 251, 29.3 Hz, 1C); <sup>19</sup>F NMR (282 MHz, CDCl<sub>3</sub>) δ –123.1 (t, *J* = 8.2 Hz, 2F); IR (film) ν<sub>max</sub> 1707, 1108, 801 cm<sup>-1</sup>; HRMS (EI) *m/z* calcd for C<sub>12</sub>H<sub>8</sub>DF<sub>2</sub>O (M+H)<sup>+</sup> 208.0684, found 208.0681.

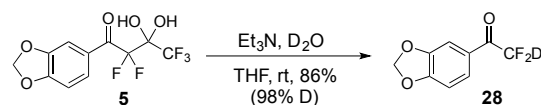

**1-(Benzo[d][1,3]dioxol-5-yl)-2-deutero-2,2-difluoroethanone 28.** See representative reaction procedure. 1-(Benzo[d][1,3]dioxol-5-yl)-2,2,4,4,4-pentafluoro-3,3-dihydroxybutan-1-one **5**<sup>1</sup> (79 mg, 0.25 mmol), Et<sub>3</sub>N (140 μL, 1.01 mmol), and D<sub>2</sub>O/THF (2 mL/0.5 mL) were used. The title compound **28** was isolated as a colorless solid (43 mg) in 86% yield (98% deuterium incorporation): mp 61–63 °C; <sup>1</sup>H NMR (500 MHz, CDCl<sub>3</sub>) δ 7.71 (ddt, *J* = 8.3, 1.7, 1.1 Hz, 1H), 7.49 (d, *J* = 1.5 Hz, 1H), 6.90 (d, *J* = 8.3 Hz, 1H), 6.09 (s, 2H); <sup>13</sup>C NMR (125 MHz, CDCl<sub>3</sub>) δ 185.6 (t, *J* = 25.4 Hz, 1C), 153.4, 148.5, 126.9 (t, *J* = 3.1 Hz, 1C), 126.0, 111.0 (tt, *J* = 250, 28.8 Hz, 1C), 108.8, 108.4, 102.2; <sup>19</sup>F NMR (282 MHz, CDCl<sub>3</sub>) δ –122.8 (t, *J* = 8.2 Hz, 2F); IR (film) ν<sub>max</sub> 1694, 1447, 1239, 1095, 1035 cm<sup>-1</sup>; HRMS (EI) *m/z* calcd for C<sub>9</sub>H<sub>5</sub>DF<sub>2</sub>O<sub>3</sub> (M)<sup>+</sup> 201.0348, found 201.0345.

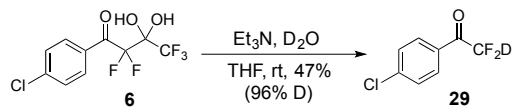

**1-(4-Chlorophenyl)-2-deutero-2,2-difluoroethanone 29.** See representative reaction procedure. 1-(4-Chlorophenyl)-2,2,4,4,4-pentafluoro-3,3-dihydroxybutan-1-one **6**<sup>1</sup> (68.5 mg, 0.23 mmol), Et<sub>3</sub>N (125  $\mu$ L, 0.90 mmol), and D<sub>2</sub>O/THF (2 ml/0.5 ml) were used. The title compound **29** was isolated as a colorless oil (20 mg) in 47% yield (96% deuterium incorporation): <sup>1</sup>H NMR (500 MHz, CDCl<sub>3</sub>)  $\delta$  8.03 (d,  $J$  = 8.5 Hz, 2H), 7.51 (d,  $J$  = 9.0 Hz, 2H); <sup>13</sup>C NMR (125 MHz, CDCl<sub>3</sub>)  $\delta$  186.6 (t,  $J$  = 56.4 Hz, 1C), 141.7, 131.0 (2), 129.6, 129.4 (2), 111.0 (tt,  $J$  = 566, 64.9 Hz, 1C); <sup>19</sup>F NMR (282 MHz, CDCl<sub>3</sub>)  $\delta$  -123.2 (t,  $J$  = 8.2 Hz, 2F); IR (film)  $\nu_{\text{max}}$  1711, 1591, 1172, 1094 cm<sup>-1</sup>; HRMS (EI)  $m/z$  calcd for C<sub>8</sub>H<sub>4</sub>DCIF<sub>2</sub>O (M)<sup>+</sup> 191.0060, found 191.056.

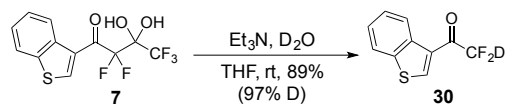

**1-(Benzo[b]thiophen-3-yl)-2-deutero-2,2-difluoroethanone 30.** See representative reaction procedure. 1-(Benzo[b]thiophen-3-yl)-2,2,4,4,4-pentafluoro-3,3-dihydroxybutan-1-one **7**<sup>4</sup> (10 mg, 0.03 mmol), LiBr (16 mg, 0.18 mmol) and Et<sub>3</sub>N (9  $\mu$ L, 0.06 mmol) was used. The title compound **30** was isolated as a colorless oil (5.7 mg) in 86% yield (97% deuterium incorporation): <sup>1</sup>H NMR (400 MHz, CDCl<sub>3</sub>)  $\delta$  8.74 (d,  $J$  = 8.1 Hz, 1H), 8.69 (s, 1H), 7.91 (d,  $J$  = 8.0 Hz, 1H), 7.55 (t,  $J$  = 7.7 Hz, 1H), 7.48 (t,  $J$  = 7.5 Hz, 1H); <sup>13</sup>C NMR (125 MHz, CDCl<sub>3</sub>)  $\delta$  182.4 (t,  $J$  = 25.6 Hz, 1C), 141.4 (t,  $J$  = 6.1 Hz, 1C), 139.0, 136.6, 128.5, 126.4, 126.1, 125.2, 122.3, 111.2 (tt,  $J$  = 252, 28.8 Hz, 1C); <sup>19</sup>F NMR (376 MHz, CDCl<sub>3</sub>)  $\delta$  -121.72 (t,  $J$  = 8.1 Hz, 2F); IR (film)  $\nu_{\text{max}}$  3110, 1678, 1490, 1462, 1424, 1375, 1245, 1106 cm<sup>-1</sup>; HRMS (EI)  $m/z$  calcd for C<sub>10</sub>H<sub>5</sub>DF<sub>2</sub>OS (M)<sup>+</sup> 213.0170, found 213.0162.

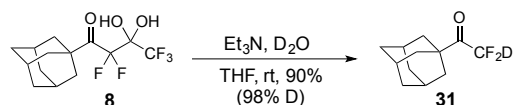

**1-(Adamantan-1-yl)-2-deutero-2,2-difluoroethanone 31.** See representative reaction procedure. 1-(Adamantan-1-yl)-2,2,4,4,4-pentafluoro-3,3-dihydroxybutan-1-one **8**<sup>1</sup> (30.0 mg, 0.09 mmol), Et<sub>3</sub>N (100  $\mu$ L, 0.73 mmol), D<sub>2</sub>O (600  $\mu$ L) were used. The title compound **31** was isolated as a colorless oil (18 mg) in 90% yield (98% deuterium incorporation): <sup>1</sup>H NMR (500 MHz, CDCl<sub>3</sub>)  $\delta$  2.08 (s, 3H), 1.94 (d,  $J$  = 2.7 Hz, 6H), 1.83–1.69 (m, 6H); <sup>13</sup>C NMR (125 MHz, CDCl<sub>3</sub>)  $\delta$  201.9 (t,  $J$  = 21.8 Hz, 1C), 108.8 (tt,  $J$  = 566, 62.0 Hz, 1C), 45.2, 37.1 (3), 36.2 (3), 27.5 (3); <sup>19</sup>F NMR (282 MHz, CDCl<sub>3</sub>)  $\delta$  -126.4 (t,  $J_{\text{DF}}$  = 8.2 Hz, 2F); IR (film)  $\nu_{\text{max}}$  2910, 1732, 1454, 1109 cm<sup>-1</sup>; HRMS (EI)  $m/z$  calcd for C<sub>12</sub>H<sub>16</sub>DF<sub>2</sub>O (M+H)<sup>+</sup> 216.1301, found 216.1312.

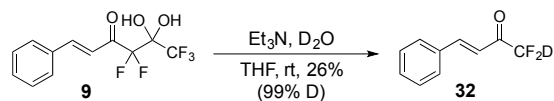

**(E)-1-Deutero-1,1-difluoro-4-phenylbut-3-en-2-one 32.** See representative reaction procedure. (E)-4,4,6,6,6-Pentafluoro-5,5-dihydroxy-1-phenylhex-1-en-3-one **9**<sup>4</sup> (100 mg, 0.34 mmol) and Et<sub>3</sub>N (90  $\mu$ L, 0.67 mmol) were used. SiO<sub>2</sub> flash chromatography (17:3 hexanes/EtOAc) afforded

the title compound **32** as a colorless oil (16 mg) in 26% yield (99% deuterium incorporation):  $^1\text{H}$  NMR (500 MHz,  $\text{CDCl}_3$ )  $\delta$  7.90 (d,  $J = 16.1$  Hz, 1H), 7.69–7.61 (m, 2H), 7.51–7.41 (m, 3H), 7.05 (dt,  $J = 16.1, 1.2$  Hz, 1H);  $^{13}\text{C}$  NMR (125 MHz,  $\text{CDCl}_3$ )  $\delta$  187.7 (t,  $J = 25.8$  Hz, 1C), 148.1, 133.6, 131.7, 129.1 (2C), 128.9 (2C), 117.8, 110.1 (tt,  $J = 25.8, 27.5$  Hz, 1C);  $^{19}\text{F}$  NMR (282 MHz,  $\text{CDCl}_3$ )  $\delta$  -127.44 (t,  $J = 8.2$  Hz, 2F); IR (film)  $\nu_{\text{max}}$  3064.22, 3031.15, 2931.99, 2262.84, 1703.98, 1607.18, 1577.24, 1496.63, 1451.50, 1343.70  $\text{cm}^{-1}$ ; HRMS (EI/CI)  $m/z$  calcd for  $\text{C}_{10}\text{H}_7\text{DF}_2\text{O}$  ( $\text{M}^+$ ) 183.0606, found 183.0603.

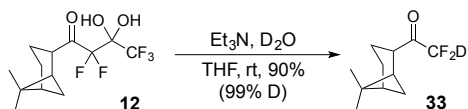

**2-Deutero-2,2-difluoro-1-(6,6-dimethylbicyclo[3.1.1]heptan-2-yl)ethanone 33.** See representative reaction procedure. 1-((1*S*,2*S*,5*S*)-6,6-Dimethylbicyclo[3.1.1]heptan-2-yl)-2,2,4,4,4-pentafluoro-3,3-dihydroxybutan-1-one **12**<sup>1</sup> (67.1 mg, 0.268 mmol) and  $\text{Et}_3\text{N}$  (151  $\mu\text{L}$ , 1.07 mmol) were used. The title compound **33** was isolated as a colorless oil (49 mg) in 90% yield (99% deuterium incorporation):  $^1\text{H}$  NMR (500 MHz,  $\text{CDCl}_3$ )  $\delta$  3.43 (t,  $J = 8.6$  Hz, 1H), 2.17 (m, 3H), 1.90 (m, 3H), 1.62 (m, 1H), 1.42 (d,  $J = 10.4$  Hz, 1H), 1.25 (s, 3H), 0.92 (s, 3H);  $^{13}\text{C}$  NMR (125 MHz,  $\text{CDCl}_3$ )  $\delta$  201.5 (t,  $J = 23.8$  Hz), 109.6 (tt,  $J = 25.0, 28.8$  Hz), 43.0, 42.0, 39.9, 39.4, 26.4, 23.6, 23.4, 20.2, 14.4;  $^{19}\text{F}$  NMR (282 MHz,  $\text{CDCl}_3$ )  $\delta$  -127.43 (dt,  $J = 319, 8.2$  Hz, 1F), -129.1 (dt,  $J = 319, 8.2$  Hz, 1F); IR (film)  $\nu_{\text{max}}$  2974, 2951, 2918, 1718, 1463, 1123, 958  $\text{cm}^{-1}$ ; HRMS (EI)  $m/z$  calcd for  $\text{C}_{11}\text{H}_{16}\text{DF}_2\text{O}$  ( $\text{M}+\text{H}^+$ ) 203.1232, found 203.1229;  $[\alpha]_{\text{D}}^{26} +34^\circ$  ( $c$  0.9,  $\text{CHCl}_3$ ).

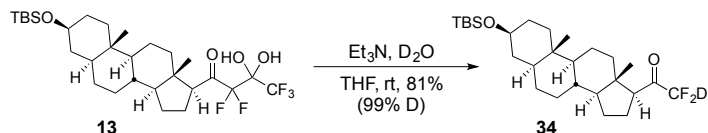

**3-(*tert*-Butyldimethylsilyl)-21-deutero-21,21-difluoropregnenolone 34.** See representative reaction procedure. 3-(*tert*-Butyldimethylsilyl)-21,21-difluoro-21-(2,2,2-trifluoro-1,1-dihydroxyethyl)-pregnenolone **13** (30 mg, 0.05 mmol) and  $\text{Et}_3\text{N}$  (58  $\mu\text{L}$ , 0.41 mmol) were used. The reaction mixture was stirred for 12 h at rt. The title compound **34** was isolated as a colorless solid (20 mg) in 81% yield (99% deuterium incorporation): mp 130–131  $^\circ\text{C}$ ;  $^1\text{H}$  NMR (500 MHz,  $\text{CDCl}_3$ )  $\delta$  3.55 (ddd,  $J = 15.7, 10.8, 4.8$  Hz, 1H), 2.95 (t,  $J = 8.9$  Hz, 1H), 2.17 (m, 1H), 1.87 (d,  $J = 12.0$  Hz, 1H), 1.80–1.63 (m, 5H), 1.57 (dq,  $J = 13.5, 3.5$  Hz, 1H), 1.49–1.17 (m, 11H), 1.13–1.03 (m, 1H), 0.92 (ddd,  $J = 28.5, 14.5, 4.5$  Hz, 2H), 0.88 (s, 9H), 0.79 (s, 3H), 0.66 (s, 3H), 0.05 (s, 6H);  $^{13}\text{C}$  NMR (125 MHz,  $\text{CDCl}_3$ )  $\delta$  201.3 (t,  $J = 24.8$  Hz, 1C), 109.5 (tt,  $J = 25.0, 28.9$  Hz, 1C), 72.0, 57.0, 54.1, 46.4 (2C), 44.9, 38.6, 37.1, 35.6, 35.5, 32.1, 31.9, 28.6, 25.9 (3), 24.6, 23.6, 23.5, 21.1, 18.3, 13.9, 12.3, -4.6 (2);  $^{19}\text{F}$  NMR (282 MHz,  $\text{CDCl}_3$ )  $\delta$  -129.0–129.1 (m, 2F); IR (film)  $\nu_{\text{max}}$  2931, 1730, 1252  $\text{cm}^{-1}$ ; HRMS (ESI)  $m/z$  calcd for  $\text{C}_{27}\text{H}_{46}\text{DF}_2\text{O}_2\text{Si}$  ( $\text{M}+\text{H}^+$ ) 470.3376, found 470.3372;  $[\alpha]_{\text{D}}^{23} +59^\circ$  ( $c$  0.18,  $\text{CHCl}_3$ ).

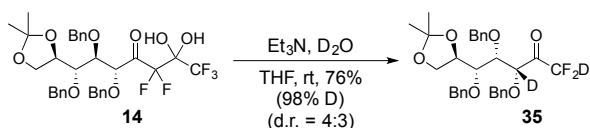



**(4*S*,5*R*)-3,4,5-Tris(benzyloxy)-5-((*R*)-2,2-dimethyl-1,3-dioxolan-4-yl)-1-deutero-1,1-difluoropentan-2-one 35.** To a solution of (5*R*,6*S*,7*R*)-5,6,7-tris(benzyloxy)-7-((*R*)-2,2-dimethyl-1,3-dioxolan-4-yl)-1,1,1,3,3-pentafluoro-2,2-dihydroxyheptan-4-one **14**<sup>8</sup> (116 mg, 0.177 mmol) in D<sub>2</sub>O/THF (2.75 mL/2.75 mL) was added LiBr (47 mg, 0.53 mmol) followed by Et<sub>3</sub>N (98 μL, 0.71 mmol), and the resultant mixture was stirred for 30 min at rt. The organics were extracted with CDCl<sub>3</sub> (3 × 1 mL), dried over Na<sub>2</sub>SO<sub>4</sub>, and concentrated under reduced pressure to afford the title compound **35** (51 mg, colorless oil) as an inseparable mixture of diastereomers (d.r. = 4:3) in 53% yield (98% deuterium incorporation): <sup>1</sup>H NMR (400 MHz, (CD<sub>3</sub>)<sub>2</sub>CO) δ 7.53–7.22 (m, 15H), 4.92–4.81(m, 1H), 4.76 (m, 4H), 4.40–3.91 (m, 6H), 1.36\* (s, 3H), 1.34 (s, 3H), 1.27 (s, 3H); <sup>13</sup>C NMR (100 MHz, (CD<sub>3</sub>)<sub>2</sub>CO) δ 198.2\* (dd, *J* = 23.5, 21.6 Hz, 1C), 195.6 (dd, *J* = 24.6, 20.2, 1C), 139.1\*, 138.8, 138.7\*, 138.6, 138.2\*, 138.1, 129.4\* (2C), 129.3 (2C), 129.2\* (2C), 129.2\* (2C), 129.2, 129.1 (2C), 129.0\* (2C), 128.9, 128.9 (2C), 128.8\*, 128.8 (2C), 128.8\* (2C), 128.7\* (2C), 128.7 (2C), 128.7 (2C), 128.6\*, 128.4\*, 128.3, 110.7\* (m, 1C), 109.2\*, 109.0 (m, 1C), 108.5, 82.4, 82.2\*, 81.5 (t, *J* = 22 Hz, 1C), 80.8\*, 78.0\* (t, *J* = 22 Hz, 1C), 77.8, 77.6, 76.6\*, 75.0\*, 74.8\*, 74.4, 74.1, 73.7\*, 73.6, 67.0\*, 66.4, 26.7\*, 26.7, 25.2\*, 25.0; <sup>19</sup>F NMR (376 MHz, (CDCl<sub>3</sub>) δ –126.9 (dt, *J* = 300, 6.8 Hz, 1F), –130.4\* (dt, *J* = 311, 7.5 Hz, 1F), –133.6\* (dt, *J* = 311, 8.3 Hz, 1F), –135.0 (dt, *J* = 300, 7.9 Hz, 1F); IR (film) ν<sub>max</sub> 3035, 2990, 2934, 2878, 1749, 1457, 1384, 1214, 1067, 1053 cm<sup>-1</sup>; HRMS (ESI) *m/z* calcd for C<sub>31</sub>H<sub>32</sub>D<sub>2</sub>F<sub>2</sub>O<sub>6</sub> (M)<sup>+</sup> 542.2449, found 542.2459. \*denotes minor diastereomer.

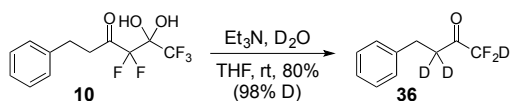

**1,1-Difluoro-1,3,3-trideutero-4-phenylbutan-2-one 36.** See representative reaction procedure. 4,4,6,6,6-Pentafluoro-5,5-dihydroxy-1-phenylhexan-3-one **10** (57.0 mg, 0.191 mmol), Et<sub>3</sub>N (107 μL, 0.765 mmol), and D<sub>2</sub>O/THF (1.9 mL/1.9 mL) were used. The title compound **36** was isolated as a colorless oil (30 mg) in 80% yield (98% deuterium incorporation): <sup>1</sup>H NMR (500 MHz, CDCl<sub>3</sub>) δ 7.32–7.28 (m, 2H), 7.25–7.18 (m, 3H), 2.96 (s, 2H); <sup>13</sup>C NMR (125 MHz, CDCl<sub>3</sub>) δ 199.0 (t, *J* = 26.5 Hz, 1C), 139.8, 128.6 (2C), 128.3 (2C), 126.5, 109.5 (tt, *J* = 251, 29.0 Hz, 1C), 37.0 (m, 1C), 28.2; <sup>19</sup>F NMR (282 MHz, CDCl<sub>3</sub>) δ –128.7 (t, *J* = 7.9 Hz, 2F); IR (film) ν<sub>max</sub> 3066, 3031, 2930, 2870, 2918, 1747, 1605, 1498, 1456, 1163, 1110, 955 cm<sup>-1</sup>; HRMS (EI) *m/z* calcd for C<sub>10</sub>H<sub>7</sub>D<sub>3</sub>F<sub>2</sub>O (M)<sup>+</sup> 187.0888, found 187.0868.

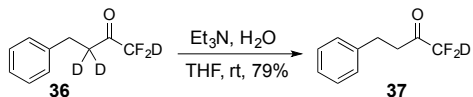

**1-Deutero-1,1-difluoro-4-phenylbutan-2-one 37.** To a solution of 1,1-difluoro-1,3,3-trideutero-4-phenylbutan-2-one **36** (10.1 mg, 0.054 mmol) in H<sub>2</sub>O/THF (0.5 mL/0.5 mL) was added Et<sub>3</sub>N (20 μL, 0.22 mmol) dropwise. After 24 h, the reaction was extracted with CH<sub>2</sub>Cl<sub>2</sub> (3 mL × 2). The organics were dried over Na<sub>2</sub>SO<sub>4</sub> and concentrated under reduced pressure. The title compound **37** was isolated as a colorless oil (7.9 mg) in 79% yield: <sup>1</sup>H NMR (300 MHz, CDCl<sub>3</sub>) δ 7.32–7.27 (m, 2H), 7.25–7.18 (m, 3H), 3.03–2.95 (m, 4H); <sup>13</sup>C NMR (125 MHz, CDCl<sub>3</sub>) δ 198.9 (tt, *J* = 251, 28.9 Hz), 139.8, 128.6 (2C), 128.3 (2C), 126.5, 109.5 (t, *J* = 28.9 Hz, 1C), 37.7, 28.3; <sup>19</sup>F NMR (282 MHz, CDCl<sub>3</sub>) δ –128.7 (t, *J* = 7.9 Hz, 2F); IR (film) ν<sub>max</sub> 3065, 3030, 2958, 2918, 2950, 1742, 1660, 1605, 956 cm<sup>-1</sup>; HRMS (ESI) *m/z* calcd for C<sub>10</sub>H<sub>8</sub>DF<sub>2</sub>O (M–H)<sup>-</sup> 184.0679, found 184.0690.

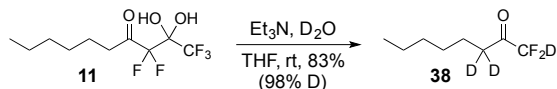

**1-Deutero-1,1-difluoro-3,3-deutero-octan-2-one 38.** 1,1,1,3,3-Pentafluoro-2,2-dihydroxydecan-4-one **38**<sup>4</sup> (59.2 mg, 0.213 mmol), Et<sub>3</sub>N (120  $\mu$ L, 0.85 mmol), and D<sub>2</sub>O/THF (2.0 mL/0.6 mL) were used. The reaction mixture was stirred for 18 hr at rt. The title compound **38** was isolated as a colorless oil (29 mg) in 83% yield (98% deuterium incorporation): <sup>1</sup>H NMR (300 MHz, CDCl<sub>3</sub>)  $\delta$  1.66–1.58 (m, 2H), 1.35–1.25 (m, 6H), 0.88 (t,  $J$  = 4.2 Hz, 3H); <sup>13</sup>C NMR (125 MHz, CDCl<sub>3</sub>)  $\delta$  200.1 (tt,  $J$  = 26.3, 7.5 Hz, 1C), 109.5 (tt,  $J$  = 250, 28.8 Hz, 1C), 35.7 (t,  $J$  = 18.8 Hz, 1C), 31.4, 28.6, 22.4, 22.2 (t,  $J$  = 5.0 Hz, 1C), 13.9; <sup>19</sup>F NMR (282 MHz, CDCl<sub>3</sub>)  $\delta$  –128.7 (t,  $J$  = 8.5 Hz, 2F); IR (film)  $\nu_{\text{max}}$  2955, 2924, 1713, 1464, 1097, 805 cm<sup>-1</sup>; HRMS (CI)  $m/z$  calcd for C<sub>8</sub>H<sub>12</sub>D<sub>3</sub>F<sub>2</sub>O (M+H)<sup>+</sup> 168.1279, found 168.1286.

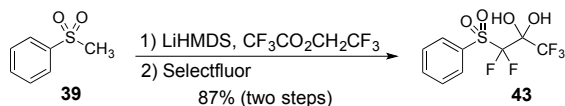

**1,1,1,3,3-Pentafluoro-3-(phenylsulfonyl)propane-2,2-diol 43.** To a –78 °C solution of *n*-BuLi (452  $\mu$ L, 1.7 M in hexanes) in THF (3 mL) was added hexamethyldisilazane (161  $\mu$ L, 0.768 mmol). After stirring the reaction for 20 min at –78 °C, a solution of methyl phenyl sulfone **39** (100 mg, 0.64 mmol) in THF (2 mL) was added dropwise. The mixture was stirred for 90 min at –78 °C, and then 2,2,2-trifluoroethyl 2,2,2-trifluoroacetate (129  $\mu$ L, 0.960 mmol) was added dropwise. After an additional 60 min of stirring at the same temperature, the reaction was warmed to rt, quenched with 1 M aqueous H<sub>2</sub>SO<sub>4</sub> (3 mL) and then stirred for 60 min. The resultant mixture was extracted with CH<sub>2</sub>Cl<sub>2</sub> (5 mL  $\times$  3). The organics were dried over Na<sub>2</sub>SO<sub>4</sub> and concentrated under reduced pressure. The residue was dissolved in CH<sub>3</sub>CN (10 mL) and treated with Selectfluor<sup>®</sup> (1.13 g, 3.20 mmol). The reaction mixture was heated to 80 °C with stirring for 24 h. Next, the reaction was diluted with EtOAc (50 mL), filtered through Celite, and concentrated under reduced pressure to afford the title compound **43** in 87% yield (170 mg) as a colorless solid: mp 84–86 °C; <sup>1</sup>H NMR (400 MHz, CDCl<sub>3</sub>)  $\delta$  8.03 (d,  $J$  = 7.8 Hz, 2H), 7.81 (t,  $J$  = 7.5 Hz, 1H), 7.65 (t,  $J$  = 7.9 Hz, 2H), 5.17 (br s, 2H); <sup>13</sup>C NMR (100 MHz, CDCl<sub>3</sub>)  $\delta$  136.3, 132.3, 130.9 (2C), 129.5 (2C), 121.8 (q,  $J$  = 289 Hz, 1C), 116.1 (t,  $J$  = 302 Hz, 1C), 93.2 (qt,  $J$  = 33.0, 8.0 Hz, 1C); <sup>19</sup>F NMR (564 MHz, CDCl<sub>3</sub>)  $\delta$  –82.5 (t,  $J$  = 10.8 Hz, 3F), –111.2 (q,  $J$  = 10.8 Hz, 2F); IR (film)  $\nu_{\text{max}}$  3442, 2925, 2853, 1336, 1177, 1151, 1072 cm<sup>-1</sup>; HRMS (ESI)  $m/z$  calcd for C<sub>9</sub>H<sub>7</sub>ClF<sub>5</sub>O<sub>4</sub>S (M+Cl)<sup>-</sup> 340.9674, found 340.9645.

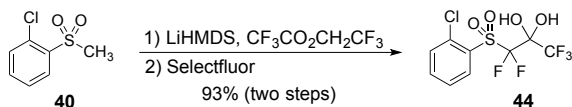

**1-((2-Chlorophenyl)sulfonyl)-1,1,3,3,3-pentafluoropropane-2,2-diol 44.** To a –78 °C solution of *n*-BuLi (370  $\mu$ L, 1.7 M in hexanes) in THF (4 mL) was added hexamethyldisilazane (132  $\mu$ L, 0.629 mmol). After stirring the reaction for 20 min at –78 °C, a solution of 2-chlorophenyl methyl sulfone **40** (100 mg, 0.525 mmol) in THF (1 mL) was added dropwise. The mixture was stirred for 90 min at –78 °C, and then 2,2,2-trifluoroethyl 2,2,2-trifluoroacetate (106  $\mu$ L, 0.788 mmol) was added dropwise. After an additional 60 min of stirring at the same temperature, the reaction was warmed to room temperature, quenched with 1 M aqueous H<sub>2</sub>SO<sub>4</sub> (3 mL) and then

stirred for 60 min. The resultant mixture was extracted with CH<sub>2</sub>Cl<sub>2</sub> (5 mL × 3). The organics were dried over Na<sub>2</sub>SO<sub>4</sub> and concentrated under reduced pressure. The residue was dissolved in CH<sub>3</sub>CN (10 mL) and treated with Selectfluor<sup>®</sup> (930 mg, 263 mmol). The reaction mixture was heated to 80 °C with stirring for 24 h. Next, the reaction was diluted with EtOAc (50 mL), filtered through Celite, and concentrated under reduced pressure to afford the title compound **44** in 93% yield (166 mg) as a colorless solid: mp 118–120 °C; <sup>1</sup>H NMR (400 MHz, CDCl<sub>3</sub>) δ 8.15 (d, *J* = 8.0 Hz, 1H), 7.71 (t, *J* = 7.7 Hz, 1H), 7.64 (d, *J* = 8.0 Hz, 1H), 7.55 (t, *J* = 7.7 Hz, 1H), 4.16 (br s, 2H); <sup>13</sup>C NMR (100 MHz, CDCl<sub>3</sub>) δ 137.0, 136.1, 134.6, 132.9, 131.0, 127.7, 116.7 (t, *J* = 306 Hz, 1C), 120.3 (q, *J* = 288 Hz, 1C), 93.0 (qt, *J* = 33.0, 8.0 Hz, 1C); <sup>19</sup>F NMR (376 MHz, CDCl<sub>3</sub>) δ –82.4 (t, *J* = 10.9 Hz, 3F), –109.0 (q, *J* = 10.9 Hz, 2F); IR (film) ν<sub>max</sub> 3470, 3099, 1345, 1208, 1180, 1076 cm<sup>-1</sup>; HRMS (EI) *m/z* calcd for C<sub>9</sub>H<sub>4</sub>ClF<sub>5</sub>O<sub>3</sub>S (M–H<sub>2</sub>O)<sup>-</sup> 321.9490, found 321.9493.

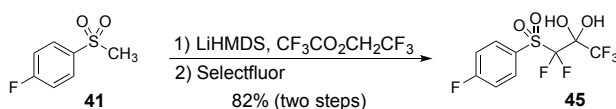

**1,1,1,3,3-Pentafluoro-3-((4-fluorophenyl)sulfonyl)propane-2,2-diol 45.** To a –78 °C solution of n-BuLi (680 μL, 2 M in hexanes) in THF (5 mL) was added hexamethyldisilazane (288 μL, 1.38 mmol). After stirring the reaction for 20 min at –78 °C, a solution of 4-fluorophenyl methyl sulfone **41** (200 mg, 1.15 mmol) in THF (2 mL) was added dropwise. The mixture was stirred for 90 min at –78 °C, and then 2,2,2-trifluoroethyl 2,2,2-trifluoroacetate (231 μL, 1.72 mmol) was added dropwise. After an additional 60 min of stirring at the same temperature, the reaction was warmed to room temperature and quenched with 1 M aqueous H<sub>2</sub>SO<sub>4</sub> (5 mL) and then stirred for 60 min. The resultant mixture was extracted with CH<sub>2</sub>Cl<sub>2</sub> (10 mL × 3). The organics were dried over Na<sub>2</sub>SO<sub>4</sub> and concentrated under reduced pressure. The residue was dissolved in CH<sub>3</sub>CN (15 mL) and treated with Selectfluor<sup>®</sup> (2.03 mg, 5.74 mmol). The reaction mixture was heated to 80 °C with stirring for 24 h. Next, the reaction was diluted with EtOAc (50 mL), filtered through Celite, and concentrated under reduced pressure to afford the title compound **45** in 82% yield (306 mg) as a colorless solid: mp 74–75 °C; <sup>1</sup>H NMR (400 MHz, CDCl<sub>3</sub>) δ 8.00 (dd, *J* = 8.7, 4.9 Hz, 2H), 7.25 (app t, *J* = 8.5 Hz, 2H), 5.07 (br s, 2H); <sup>13</sup>C NMR (100 MHz, CDCl<sub>3</sub>) δ 167.5 (d, *J* = 260 Hz, 1C), 134.0 (d, *J* = 10.3 Hz, 2C), 128.3 (d, *J* = 3.1 Hz, 1C), 120.9 (q, *J* = 289 Hz, 1C), 116.9 (t, *J* = 301 Hz), 116.9 (d, *J* = 23.1 Hz, 2C), 93.3 (qt, *J* = 25.0, 9.0 Hz, 1C); <sup>19</sup>F NMR (376 MHz, CDCl<sub>3</sub>) δ –82.5 (t, *J* = 10.9 Hz, 3F), –99.1 (tt, *J* = 8.2, 5.0 Hz, 1F), –111.0 (q, *J* = 10.9 Hz, 2F); IR (film) ν<sub>max</sub> 3445, 3110, 1342, 1177, 1154, 1075 cm<sup>-1</sup>; HRMS (ESI) *m/z* calcd for C<sub>9</sub>H<sub>5</sub>F<sub>6</sub>O<sub>4</sub>S (M–H)<sup>-</sup> 322.9818, found 322.9822.

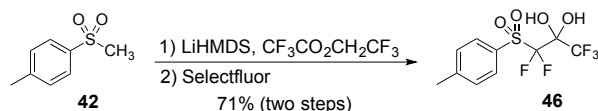

**1,1,1,3,3-Pentafluoro-3-tosylpropane-2,2-diol 46.** To a –78 °C solution of n-BuLi (420 μL, 1.7 M in hexanes) in THF (4 mL) was added hexamethyldisilazane (149 μL, 0.708 mmol). After stirring the reaction for 20 min at –78 °C, a solution of 4-(methylsulfonyl)toluene **42** (100 mg, 0.590 mmol) in THF (1 mL) was added dropwise. The mixture was stirred for 90 min at –78 °C, and then 2,2,2-trifluoroethyl 2,2,2-trifluoroacetate (119 μL, 0.855 mmol) was added dropwise. After an additional 60 min of stirring at the same temperature, the reaction was warmed to room

temperature and quenched with 1 M aqueous H<sub>2</sub>SO<sub>4</sub> (3 mL) and then stirred for 60 min. The resultant mixture was extracted with CH<sub>2</sub>Cl<sub>2</sub> (5 mL × 3). The organics were dried over Na<sub>2</sub>SO<sub>4</sub> and concentrated under reduced pressure. The residue was dissolved in CH<sub>3</sub>CN (10 mL) and treated with Selectfluor<sup>®</sup> (1.05 mg, 2.95 mmol). The reaction mixture was heated to 80 °C with stirring for 24 h. Next, the reaction was diluted with EtOAc (50 mL), filtered through Celite, and concentrated under reduced pressure to afford the title compound **46** in 71% yield (134 mg) as a colorless solid: mp 73–74 °C; <sup>1</sup>H NMR (400 MHz, CDCl<sub>3</sub>) δ 7.89 (d, *J* = 8.2 Hz, 2H), 7.44 (d, *J* = 8.3 Hz, 2H), 5.20 (br s, 2H), 2.49 (br s, 3H); <sup>13</sup>C NMR (100 MHz, CDCl<sub>3</sub>) δ 148.0, 130.9 (1C), 130.2 (2C), 129.2, 120.4 (q, *J* = 287 Hz), 116.4 (t, *J* = 301 Hz), 93.2 (qt, *J* = 25.0, 8.0 Hz, 1C), 21.9; <sup>19</sup>F NMR (564 MHz, CDCl<sub>3</sub>) δ -82.49 (t, *J* = 10.8 Hz), -111.55 (q, *J* = 10.9 Hz); IR (film) ν<sub>max</sub> 3433, 3073, 2930, 1338, 1177, 1153, 1074 cm<sup>-1</sup>; HRMS (ESI) *m/z* calcd for C<sub>10</sub>H<sub>9</sub>F<sub>5</sub>NaO<sub>4</sub>S (M+Na)<sup>+</sup> 343.0034, found 343.0012.

**Representative Reaction Procedure for α,α-Difluoromethyl Sulfoxes.** A solution of 1,1,1,3,3-pentafluoro-3-(phenylsulfonyl)propane-2,2-diol **43** (30 mg, 0.1 mmol) in H<sub>2</sub>O/THF (0.3 mL/0.3 mL) was treated with Et<sub>3</sub>N (55 μL, 0.39 mmol) and stirred for 30 min at rt. The reaction mixture was quenched with saturated aqueous NH<sub>4</sub>Cl (1 mL) then extracted with CH<sub>2</sub>Cl<sub>2</sub> (5 mL × 3). The organics were dried over Na<sub>2</sub>SO<sub>4</sub> and concentrated under reduced pressure. SiO<sub>2</sub> flash chromatography (19:1 hexanes/EtOAc) afforded the product **47** as a solid (17 mg) in 89% yield.

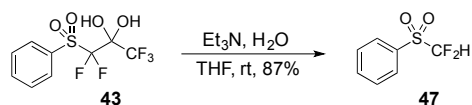

**((Difluoromethyl)sulfonyl)benzene 47.** See representative reaction procedure. All spectral and characterization data matched the reported data.<sup>9</sup>

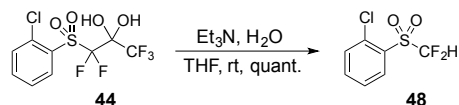

**1-Chloro-2-((difluoromethyl)sulfonyl)benzene 48.** See representative reaction procedure. 1-((2-Chlorophenyl)sulfonyl)-1,1,3,3,3-pentafluoropropane-2,2-diol **44** (30 mg, 0.09 mmol), Et<sub>3</sub>N (49 μL, 0.35 mmol), and H<sub>2</sub>O/THF (0.5 mL/0.5 mL) were used. The title compound **48** was isolated as a solid (19.5 mg) in 98% yield: mp 47–49 °C; <sup>1</sup>H NMR (400 MHz, CDCl<sub>3</sub>) δ 8.16 (dd, *J* = 8.0, 1.5 Hz, 1H), 7.69 (td, *J* = 7.9, 1.5 Hz, 1H), 7.62 (d, *J* = 8.0 Hz, 1H), 7.55 (t, *J* = 8.2 Hz, 1H), 6.52 (t, *J* = 53.8 Hz, 1H); <sup>13</sup>C NMR (100 MHz, CDCl<sub>3</sub>) δ 136.6, 134.3, 133.9, 132.4, 131.4, 127.8, 114.3 (t, *J* = 287 Hz, 1C); <sup>19</sup>F NMR (376 MHz, CDCl<sub>3</sub>) δ -122.9 (d, *J* = 53.8 Hz, 2F); IR (film) ν<sub>max</sub> 3087, 2924, 1349, 1172, 1096, 1039 cm<sup>-1</sup>; HRMS (ESI) *m/z* calcd for C<sub>7</sub>H<sub>5</sub>ClF<sub>2</sub>NaO<sub>2</sub>S (M+Na)<sup>+</sup> 248.9559, found 248.9540.

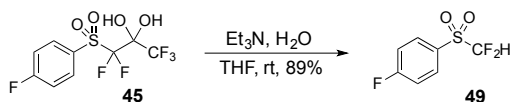

**1-((Difluoromethyl)sulfonyl)-4-fluorobenzene 49.** See representative reaction procedure.

1,1,1,3,3-Pentafluoro-3-((4-fluorophenyl)sulfonyl)propane-2,2-diol **45** (50 mg, 0.15 mmol) and Et<sub>3</sub>N (107  $\mu$ L, 0.771 mmol) were used. The title compound **49** was isolated as a solid (28 mg) in 89% yield: mp 51–52 °C; <sup>1</sup>H NMR (400 MHz, CDCl<sub>3</sub>)  $\delta$  8.01 (dd,  $J$  = 7.8, 4.6 Hz, 2H), 7.32 (app t,  $J$  = 8.3 Hz, 2H), 6.21 (t,  $J$  = 53.4 Hz, 1H); <sup>13</sup>C NMR (100 MHz, CDCl<sub>3</sub>)  $\delta$  167.3 (d,  $J$  = 258 Hz, 1C), 133.7 (d,  $J$  = 10.2 Hz, 1C), 127.6 (d,  $J$  = 3.1 Hz, 1C), 117.2 (d,  $J$  = 22.9 Hz, 1C), 114.6 (t,  $J$  = 286 Hz, 1C); <sup>19</sup>F NMR (376 MHz, CDCl<sub>3</sub>)  $\delta$  -100.3 (tt,  $J$  = 8.1, 4.9 Hz, 1F), -122.4 (d,  $J$  = 53.4 Hz, 2F); IR (film)  $\nu_{\text{max}}$  2921, 2849, 1347, 1156, 1108, 1077 cm<sup>-1</sup>; HRMS (EI)  $m/z$  calcd for C<sub>7</sub>H<sub>5</sub>F<sub>3</sub>O<sub>2</sub>S (M)<sup>+</sup> 209.9962, found 209.9975.

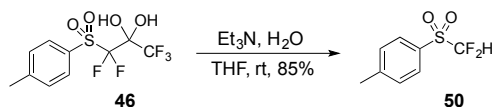

**1-((Difluoromethyl)sulfonyl)-4-methylbenzene 50.** See representative reaction procedure. The title compound **50** was isolated as a solid (22 mg) in 85% yield: mp 68–69 °C; <sup>1</sup>H NMR (400 MHz, CDCl<sub>3</sub>)  $\delta$  7.87 (d,  $J$  = 8.2 Hz, 2H), 7.44 (d,  $J$  = 8.1 Hz, 2H), 6.17 (t,  $J$  = 53.5 Hz, 1H), 2.50 (s, 3H); <sup>13</sup>C NMR (100 MHz, CDCl<sub>3</sub>)  $\delta$  147.4, 130.6 (2C), 130.3 (2C), 128.7, 114.6 (t,  $J$  = 285 Hz, 1C), 21.9; <sup>19</sup>F NMR (376 MHz, CDCl<sub>3</sub>)  $\delta$  -122.7 (d,  $J$  = 53.6 Hz, 2F); IR (film)  $\nu_{\text{max}}$  2924, 2854, 1343, 1167, 1159, 1077 cm<sup>-1</sup>; HRMS (ESI)  $m/z$  calcd for C<sub>8</sub>H<sub>8</sub>F<sub>2</sub>NaO<sub>2</sub>S (M+Na)<sup>+</sup> 229.0103, found 229.0104.

**Representative Reaction Procedure for  $\alpha$ -Deutero- $\alpha,\alpha$ -difluoromethyl Sulfoxes.** A solution of 1,1,1,3,3-pentafluoro-3-(phenylsulfonyl)propane-2,2-diol **43** (85 mg, 0.28 mmol) in D<sub>2</sub>O/THF (0.5 mL/0.5 mL) was treated with Et<sub>3</sub>N (155  $\mu$ L, 1.11 mmol) and stirred for overnight at rt. The reaction mixture was extracted with CH<sub>2</sub>Cl<sub>2</sub> (5 mL  $\times$  3). The organics were dried over Na<sub>2</sub>SO<sub>4</sub> and concentrated under reduced pressure. SiO<sub>2</sub> flash chromatography (19:1 hexanes/EtOAc) afforded the product **51** as a colorless oil (54 mg) in 74% yield (97% deuterium incorporation).

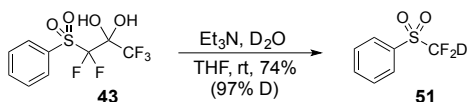

**1-((Deuterodifluoromethyl)sulfonyl)benzene 51.** See representative reaction procedure. <sup>1</sup>H NMR (400 MHz, CDCl<sub>3</sub>)  $\delta$  7.97 (d,  $J$  = 7.6 Hz, 2H), 7.78 (t,  $J$  = 7.5 Hz, 1H), 7.63 (t,  $J$  = 7.8 Hz, 2H); <sup>13</sup>C NMR (100 MHz, CDCl<sub>3</sub>)  $\delta$  135.8, 131.7, 130.5, 129.5, 114.2 (tt,  $J$  = 284, 30.8 Hz); <sup>19</sup>F NMR (376 MHz, CDCl<sub>3</sub>)  $\delta$  -123.5 (t,  $J$  = 8.1 Hz, 2F); IR (film)  $\nu_{\text{max}}$  2992, 2916, 1327, 1167, 1121, 1073 cm<sup>-1</sup>; HRMS (ESI)  $m/z$  calcd for C<sub>7</sub>H<sub>5</sub>DF<sub>2</sub>NaO<sub>2</sub>S (M+Na)<sup>+</sup> 216.0012, found 216.0038.

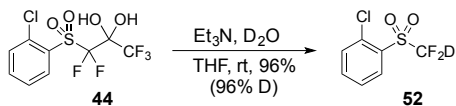

**1-Chloro-2-((deuterodifluoromethyl)sulfonyl)benzene 52.** See representative reaction procedure. The title compound **52** was isolated as a solid (20 mg) in 96% yield (96% deuterium incorporation): mp 49–50 °C; <sup>1</sup>H NMR (400 MHz, CDCl<sub>3</sub>)  $\delta$  8.17 (d,  $J$  = 8.0 Hz, 1H), 7.70 (t,  $J$  = 7.5 Hz, 1H), 7.62 (d,  $J$  = 8.0 Hz, 1H), 7.55 (t,  $J$  = 7.6 Hz, 1H); <sup>13</sup>C NMR (100 MHz, CDCl<sub>3</sub>)  $\delta$  136.6, 134.4, 133.9, 132.4, 131.5, 127.8, 114.0 (t,  $J$  = 284, 31.5 Hz), <sup>19</sup>F NMR (376 MHz,

CDCl<sub>3</sub>)  $\delta$  -123.6 (t,  $J$  = 8.4 Hz, 2F); IR (film)  $\nu_{\max}$  2921, 2851, 1346, 1191, 1124, 1093 cm<sup>-1</sup>; HRMS (EI)  $m/z$  calcd for C<sub>7</sub>H<sub>4</sub>DCIF<sub>2</sub>O<sub>2</sub>S (M)<sup>+</sup> 226.9730, found 226.9738.

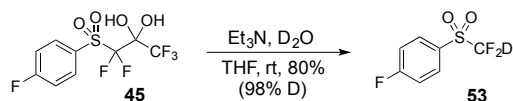

**1-((Deuterodifluoromethyl)sulfonyl)-4-fluorobenzene 53.** See representative reaction procedure. The title compound **53** was isolated as a solid (26 mg) in 80% yield (98% deuterium incorporation): mp 50–51 °C; <sup>1</sup>H NMR (400 MHz, CDCl<sub>3</sub>)  $\delta$  8.01 (dd,  $J$  = 8.8, 5.0 Hz, 1H), 7.33 (app t,  $J$  = 8.5 Hz, 1H); <sup>13</sup>C NMR (100 MHz, CDCl<sub>3</sub>)  $\delta$  167.5 (d,  $J$  = 260 Hz, 1C), 133.7 (d,  $J$  = 11.0 Hz, 1C), 127.6 (d,  $J$  = 4.0 Hz, 1C), 117.2 (d,  $J$  = 23.0 Hz, 1C), 114.2 (tt,  $J$  = 284, 31.1 Hz); <sup>19</sup>F NMR (376 MHz, CDCl<sub>3</sub>)  $\delta$  -100.3 (tt,  $J$  = 8.1, 5.0 Hz, 1F), -123.0 (t,  $J$  = 7.9 Hz, 2F); IR (film)  $\nu_{\max}$  2922, 2853, 1345, 1191, 1125, 1075 cm<sup>-1</sup>; HRMS (EI)  $m/z$  calcd for C<sub>7</sub>H<sub>4</sub>DF<sub>3</sub>O<sub>2</sub>S (M)<sup>+</sup> 211.0025, found 211.0035.

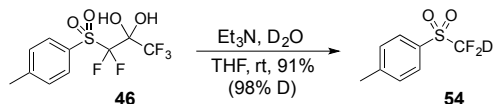

**1-((difluoromethyl-d)sulfonyl)-4-methylbenzene 54.** See representative reaction procedure. The title compound **54** was isolated as a solid (29 mg) in 91% yield (98% deuterium incorporation): mp 70–71 °C; <sup>1</sup>H NMR (400 MHz, CDCl<sub>3</sub>)  $\delta$  7.85 (d,  $J$  = 8.1 Hz, 2H), 7.43 (d,  $J$  = 8.0 Hz, 2H), 2.49 (s, 3H); <sup>13</sup>C NMR (100 MHz, CDCl<sub>3</sub>)  $\delta$  147.4, 130.5, 130.2, 128.6, 114.2 (tt,  $J$  = 282, 30.2 Hz), 21.8; <sup>19</sup>F NMR (376 MHz, CDCl<sub>3</sub>)  $\delta$  -123.6 (t,  $J$  = 8.4 Hz, 2F); IR (film)  $\nu_{\max}$  2924, 2849, 1339, 1180, 1123, 1075 cm<sup>-1</sup>; HRMS (ESI)  $m/z$  calcd for C<sub>8</sub>H<sub>8</sub>DF<sub>2</sub>O<sub>2</sub>S (M+H)<sup>+</sup> 208.0354, found 208.0351.

## References

- Han, C.; Kim, E. H.; Colby, D. A. *J. Am. Chem. Soc.* **2011**, *133*, 5802–5805.
- Han, C. Discovery of the Trifluoroacetate Release Process and Its Strategic Application toward the Synthesis of Biologically Active Molecules. Ph.D. Thesis, Purdue University, West Lafayette, Indiana, 2013.
- Leng, D. J.; Black, C. M.; Pattison, G. *Org. Biomol. Chem.* **2016**, *14*, 1531–1535.
- John, J. P.; Colby, D. A. *J. Org. Chem.* **2011**, *76*, 9163–9168.
- Pravst, I.; Zupan, M.; Stavber, S. *Synthesis* **2005**, *18*, 3140–3146.
- Yamazaki, T.; Mizutani, K.; Takeda, M.; Kitazume, T. *J. Fluorine Chem.* **1992**, *56*, 271–284.
- Shingate, B. B.; Hazra, B. G.; Pore, V. S.; Gonnade, R. G.; Bhadhade, M. M. *Tetrahedron* **2007**, *63*, 5622–5635.
- Hazlitt, R. A.; John, J. P.; Tran, Q.-L.; Colby, D. A. *Tetrahedron Letters* **2016**, *57*, 1906–1908.
- Stahly, G. P., (Ethyl Corporation, Richmond, VA, USA), US4837327 A, June 6, 1989.

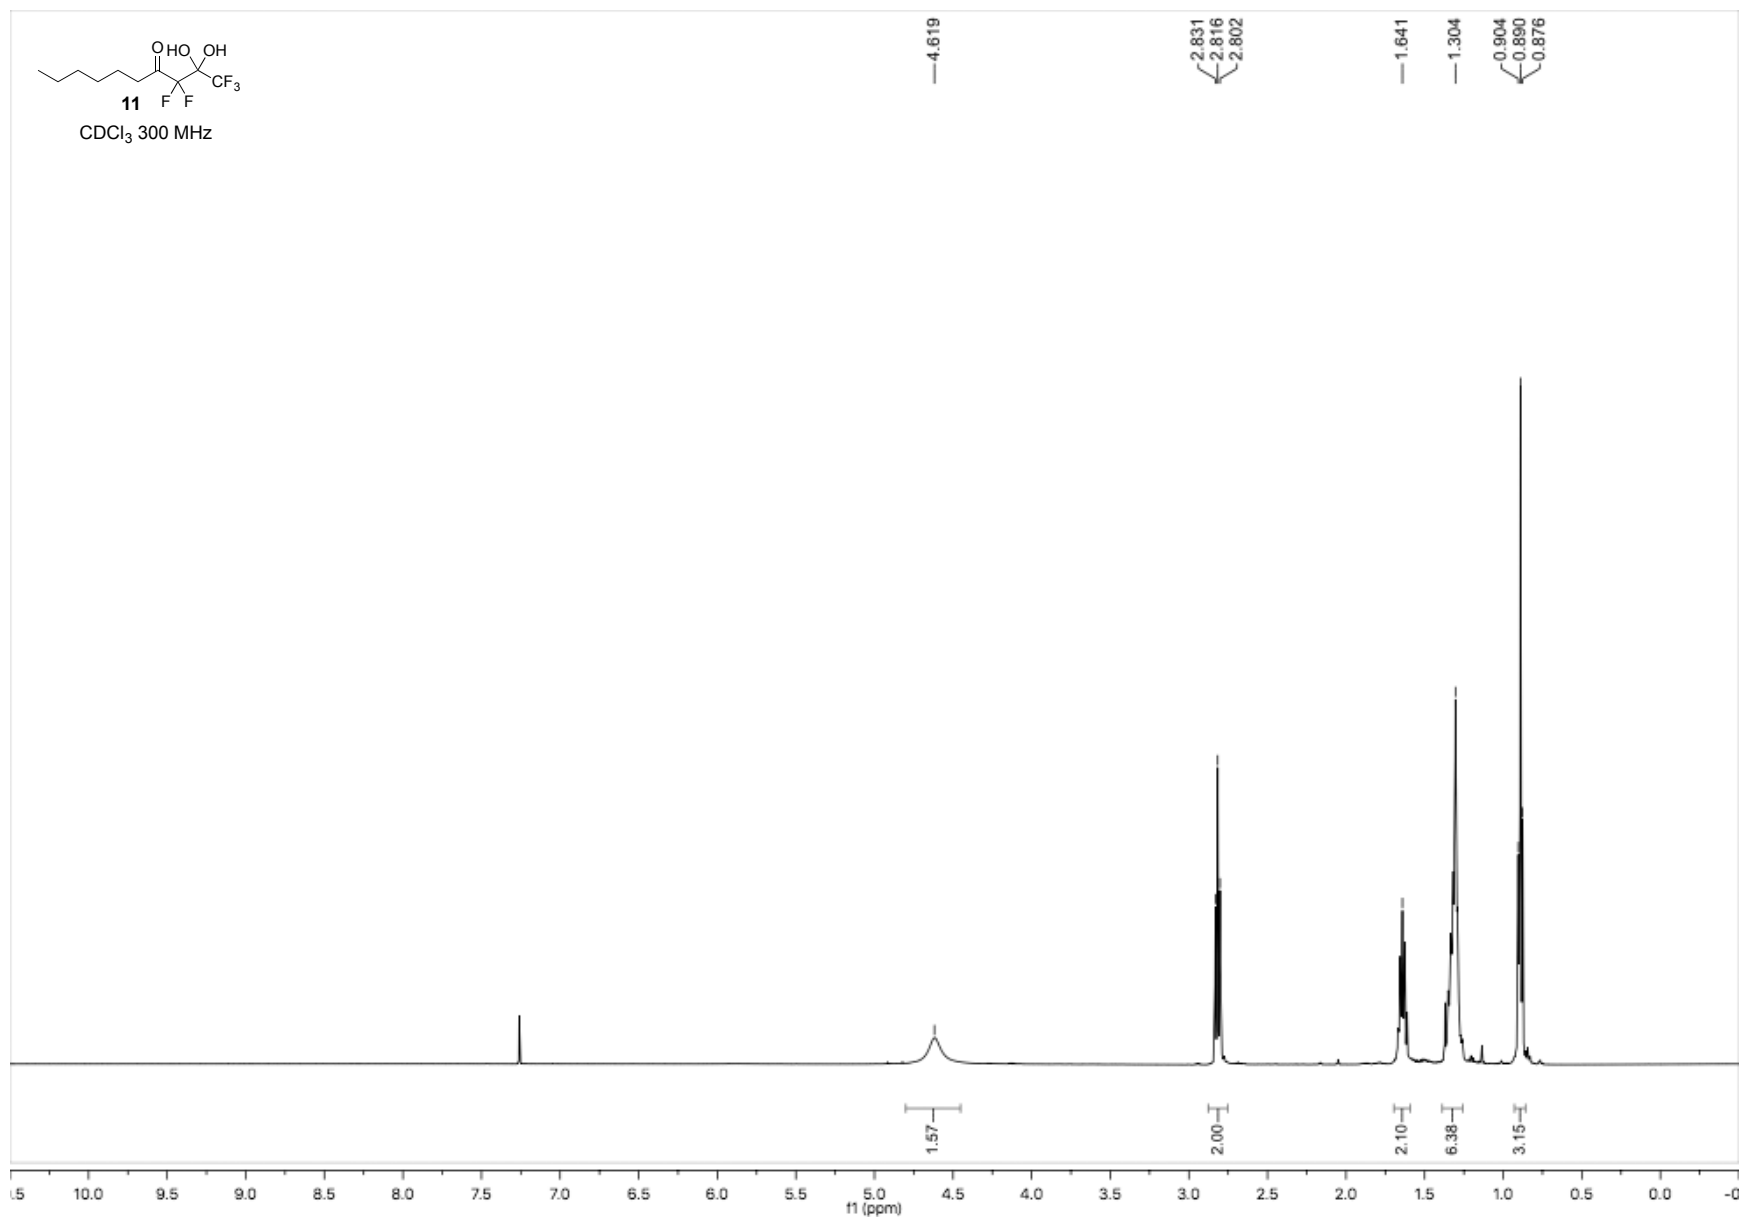

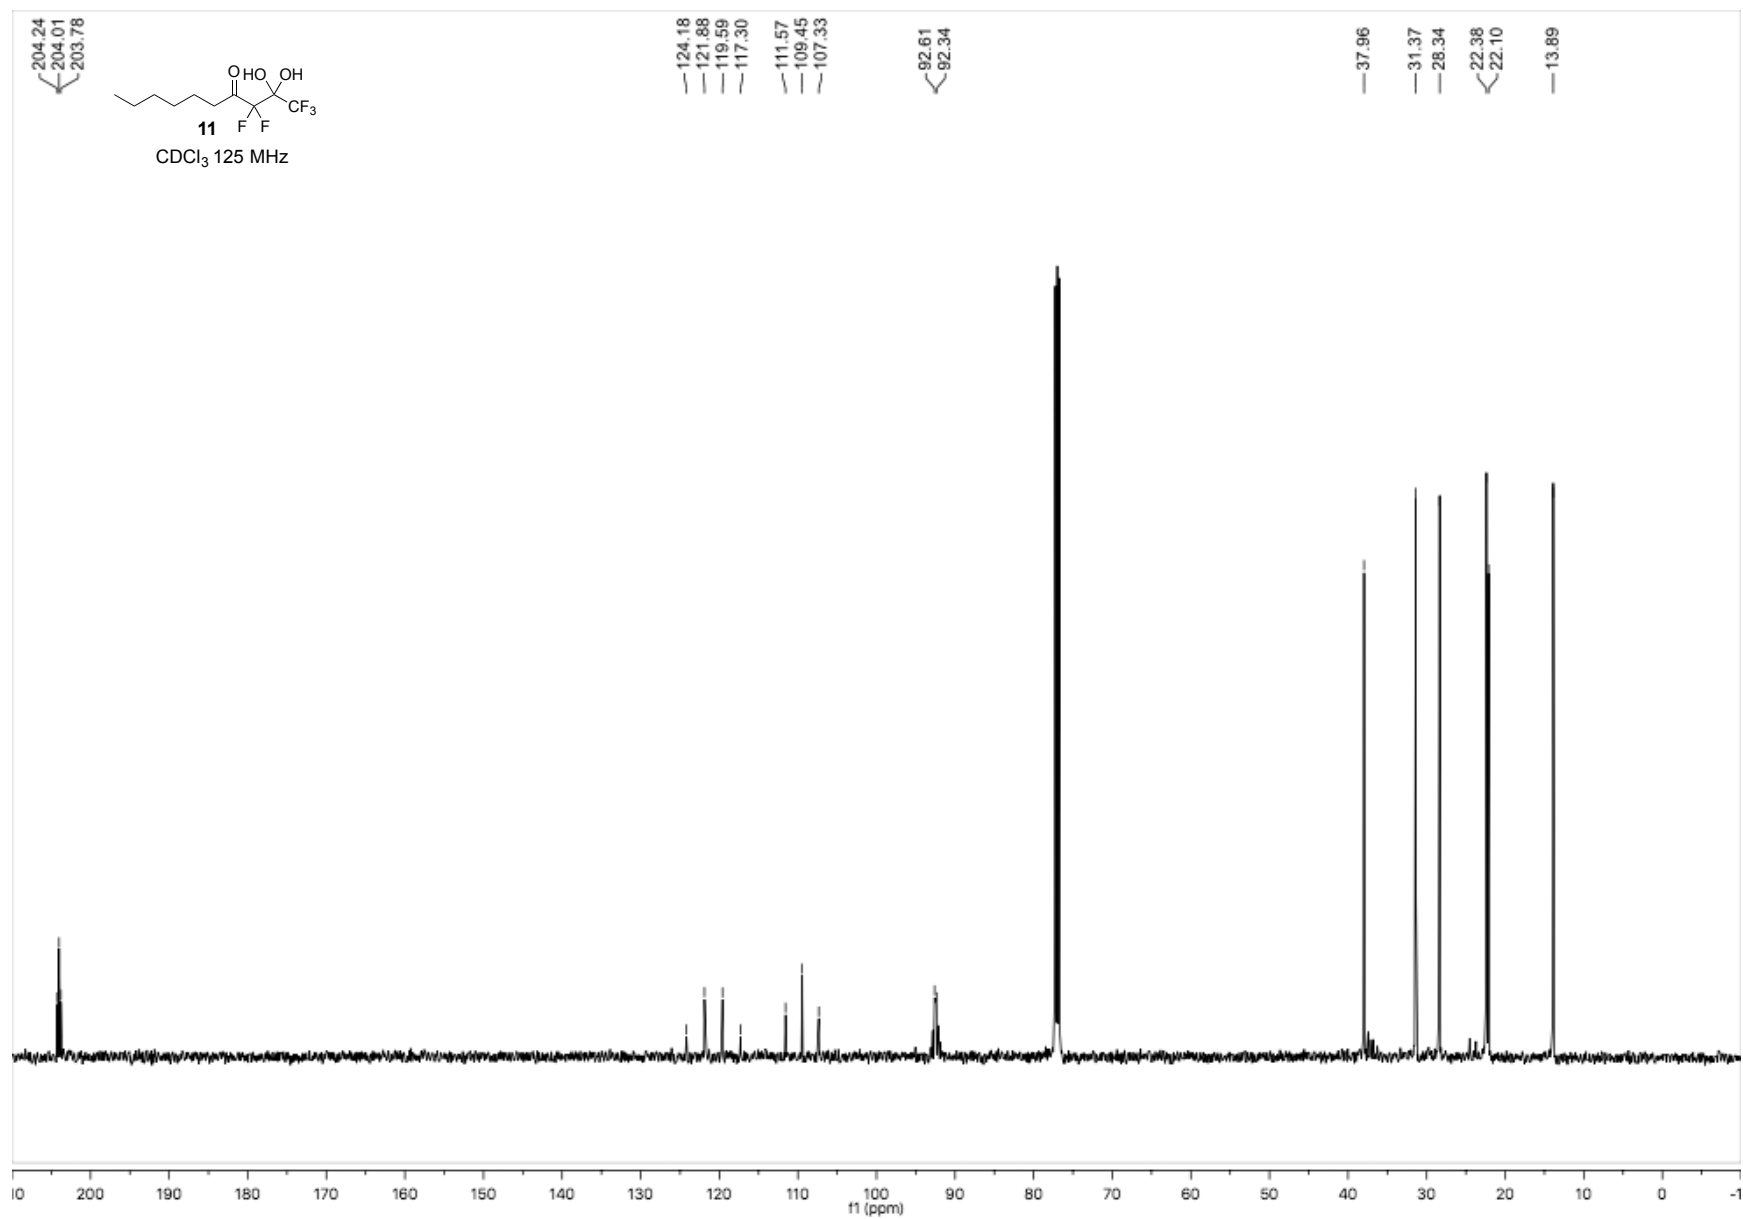



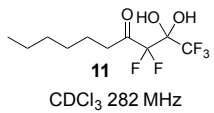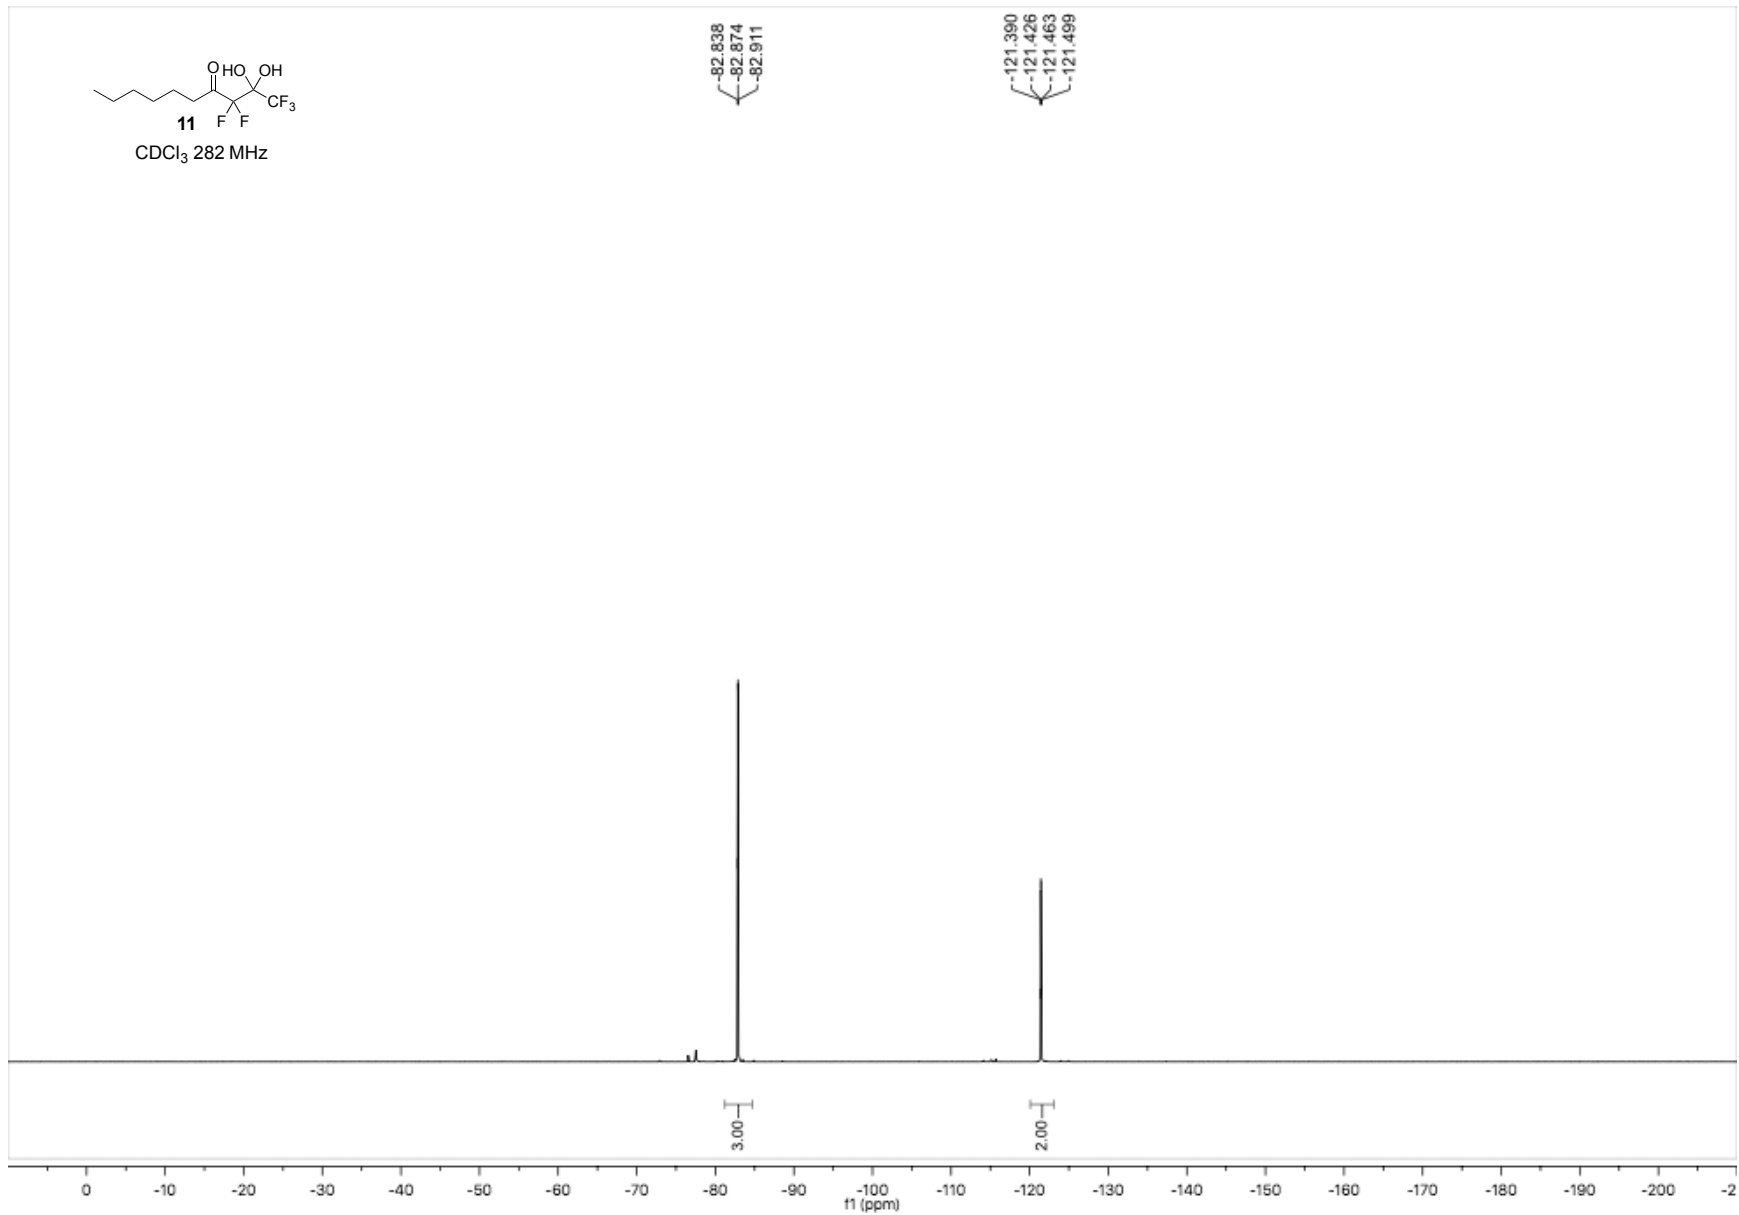

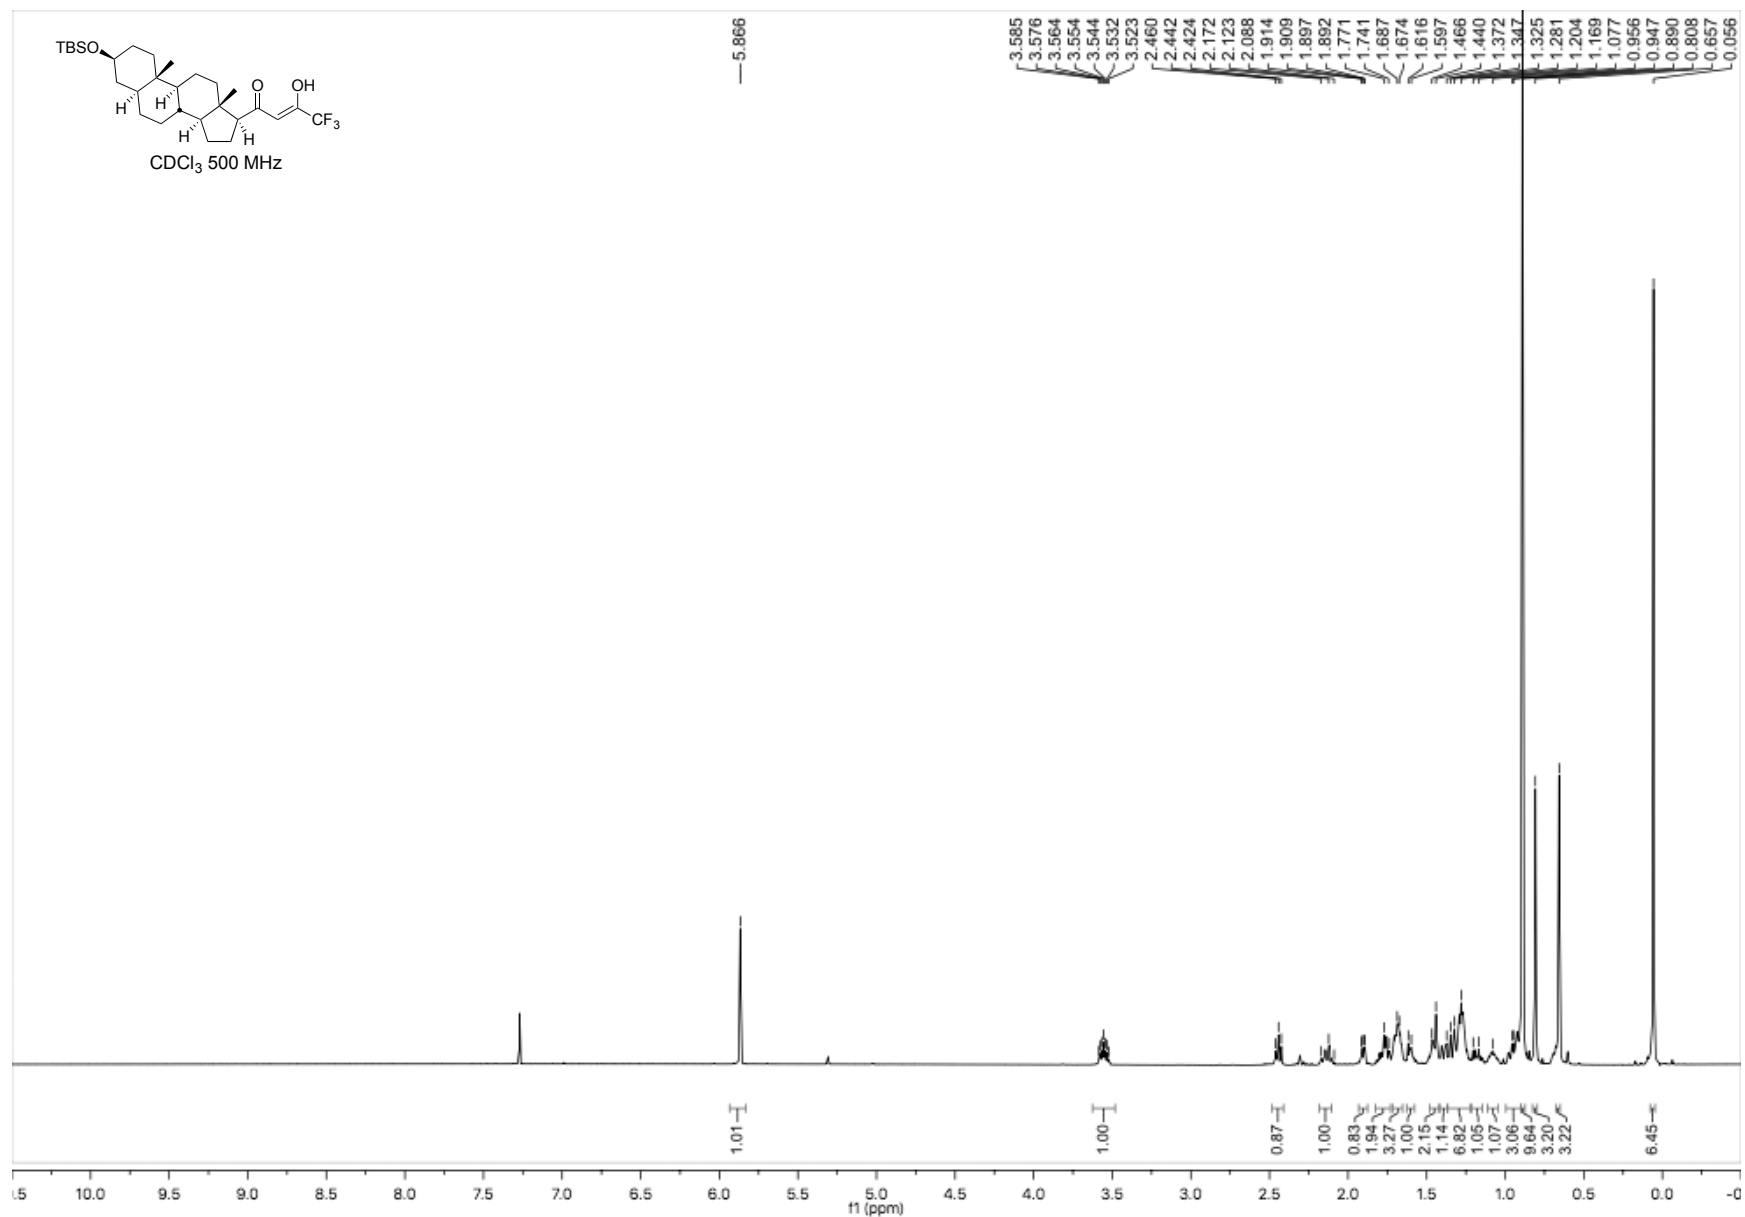



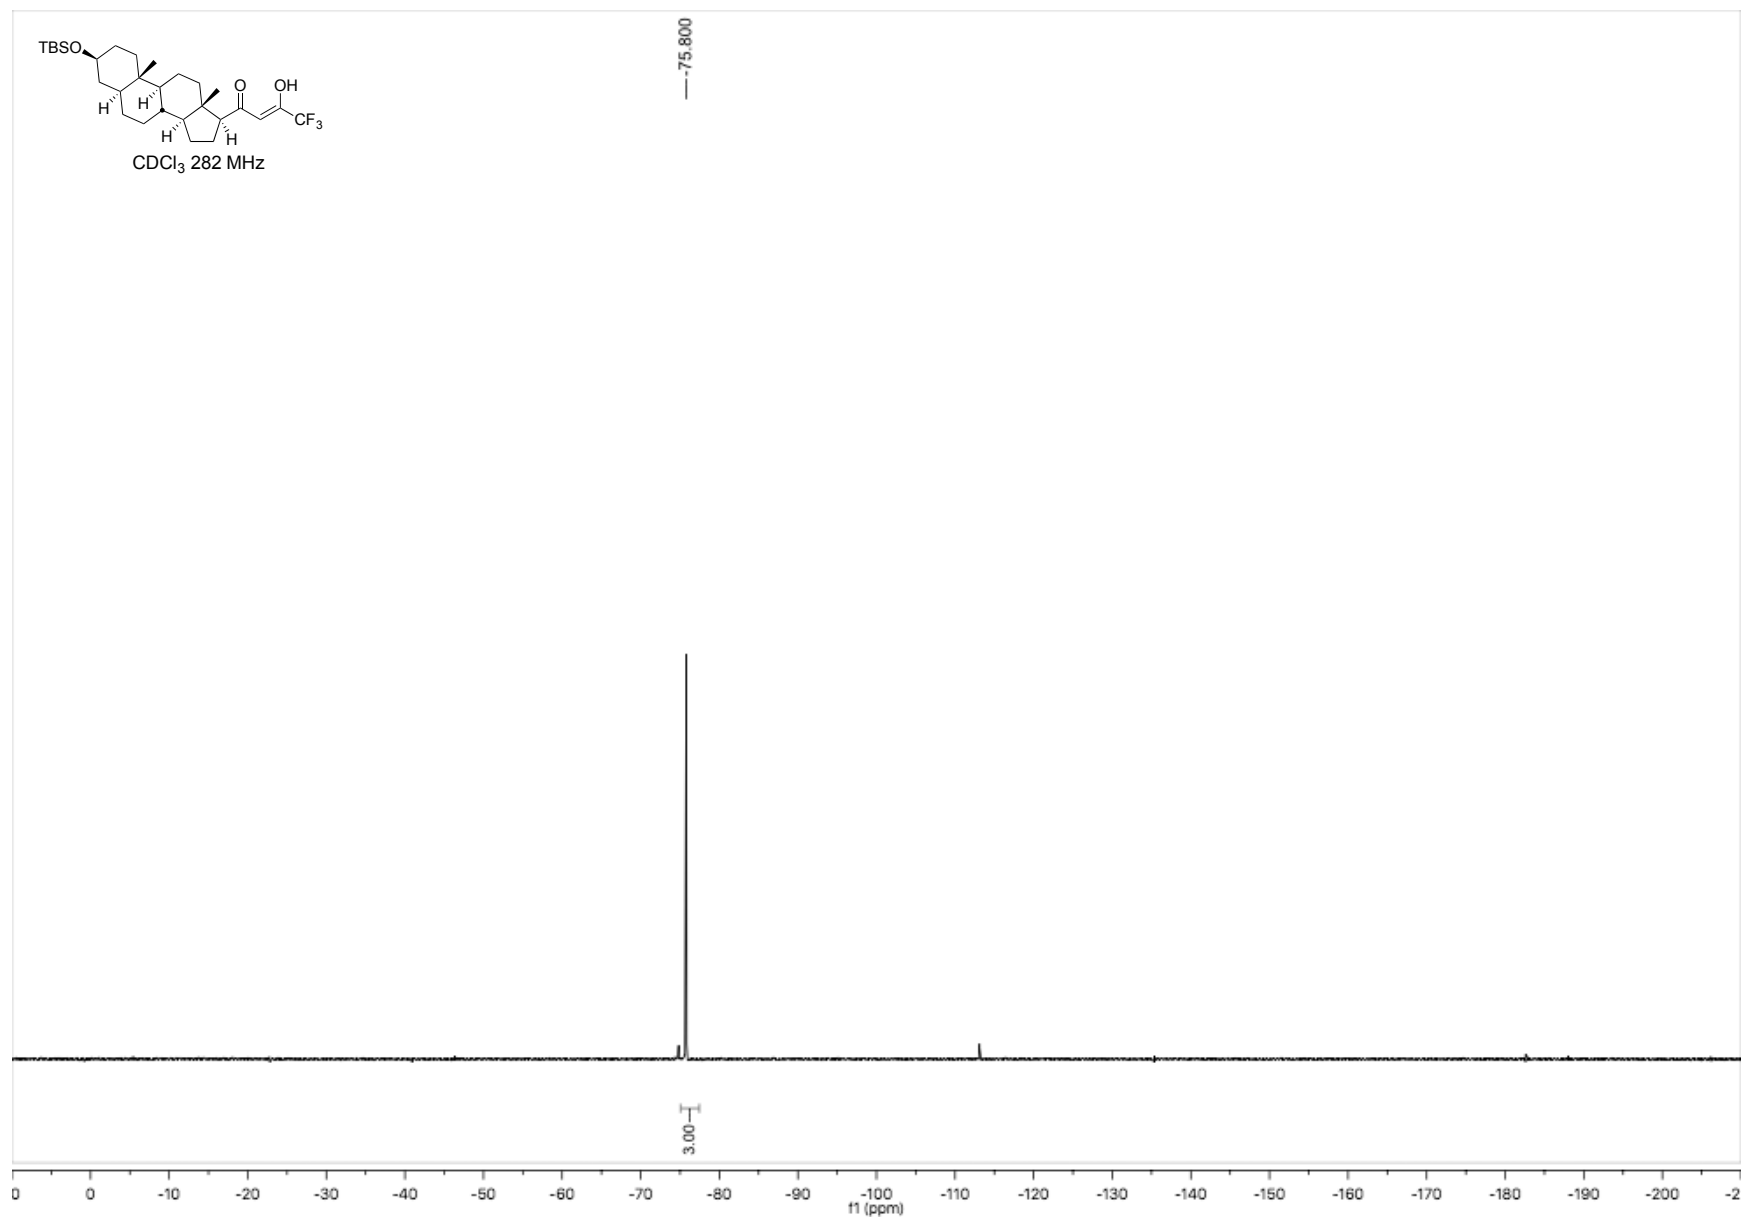



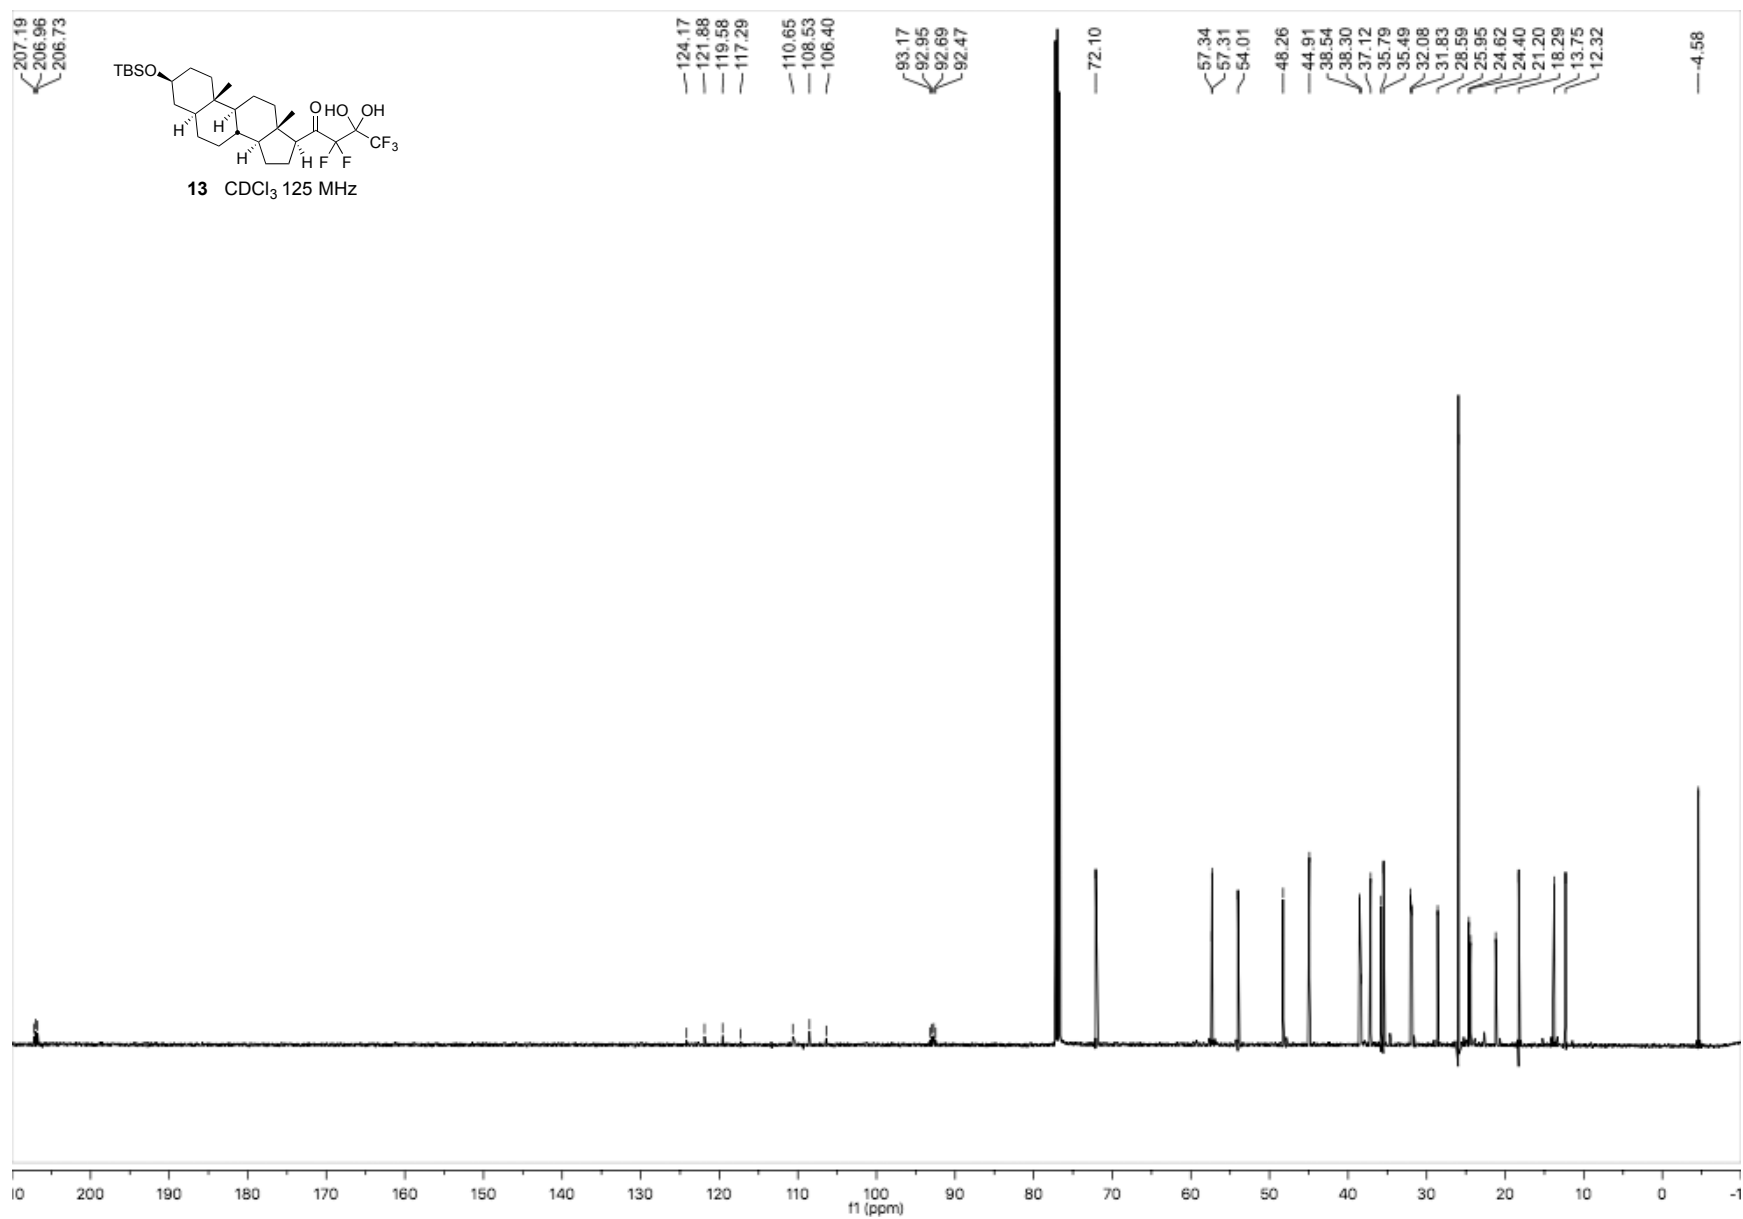

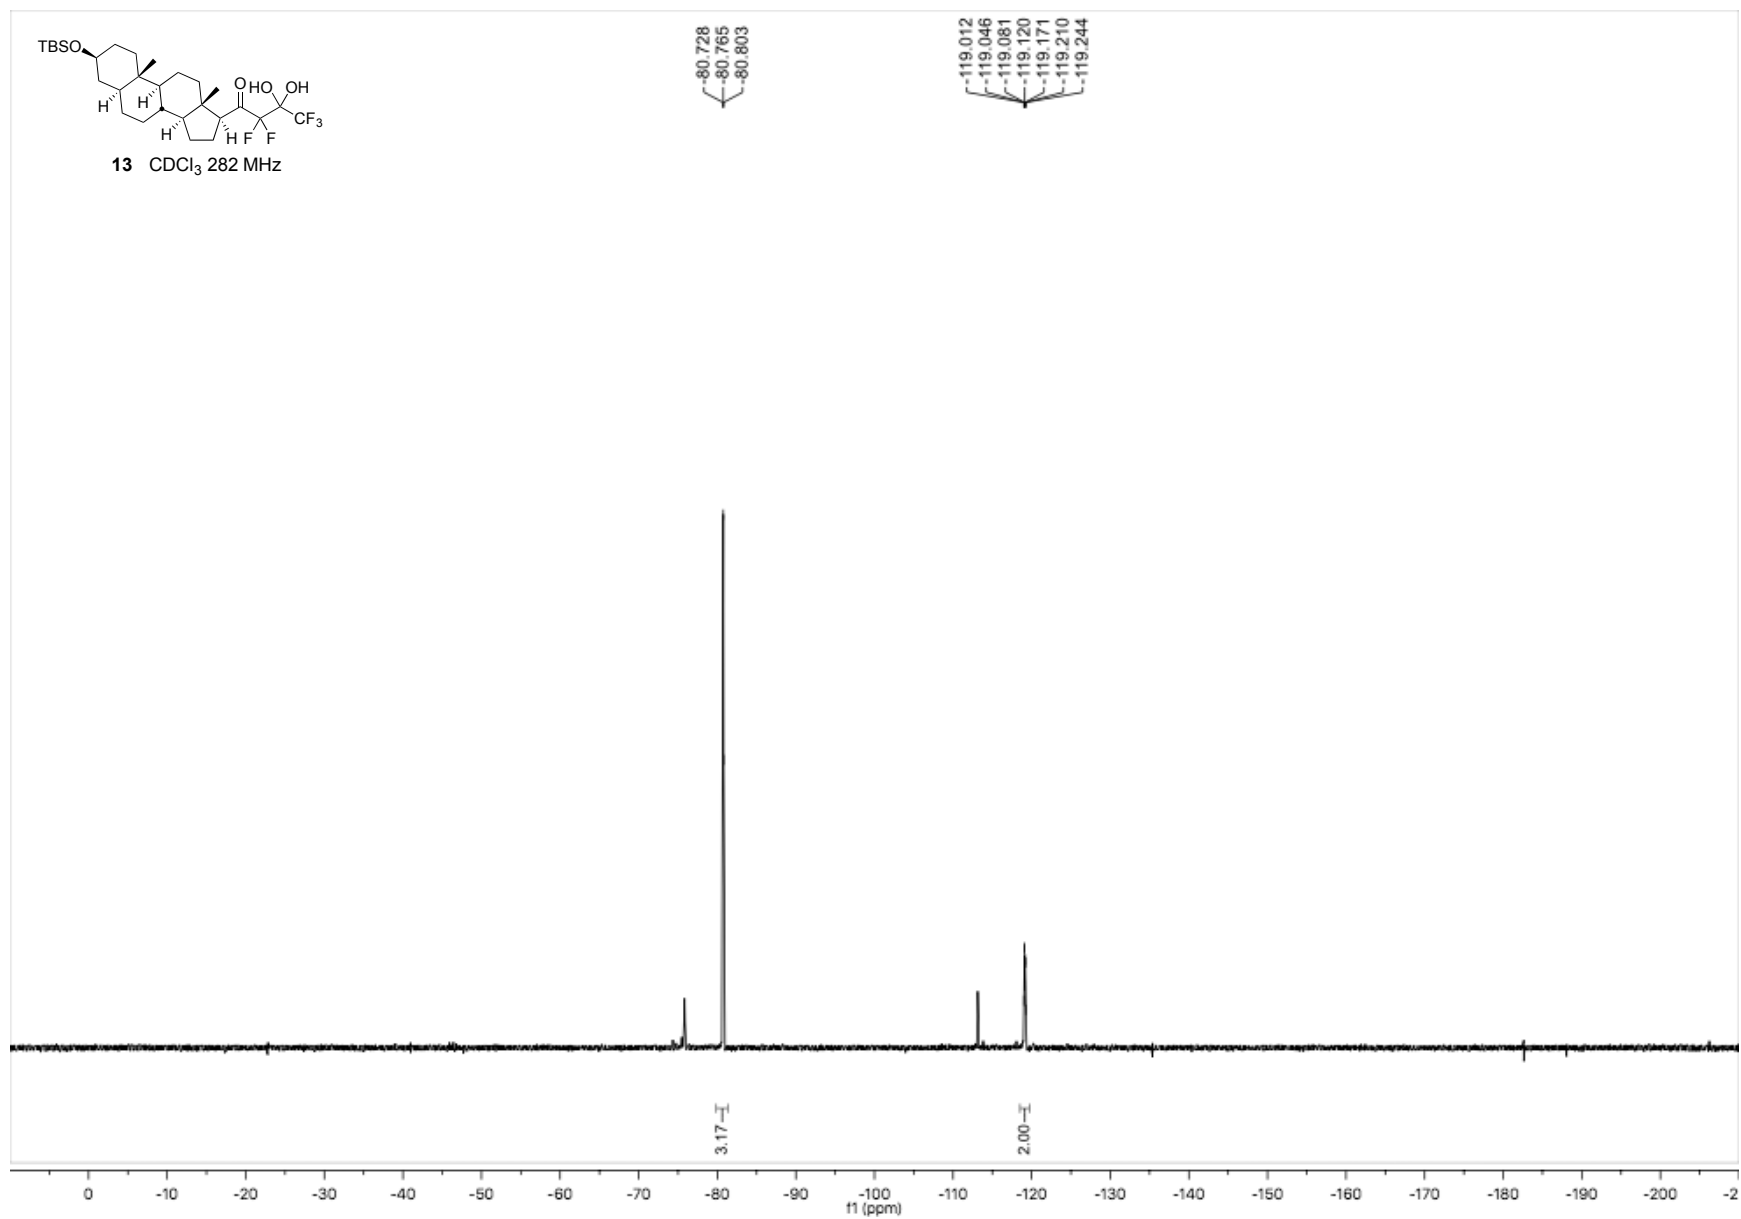

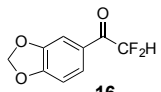

CDCl<sub>3</sub> 500 MHz

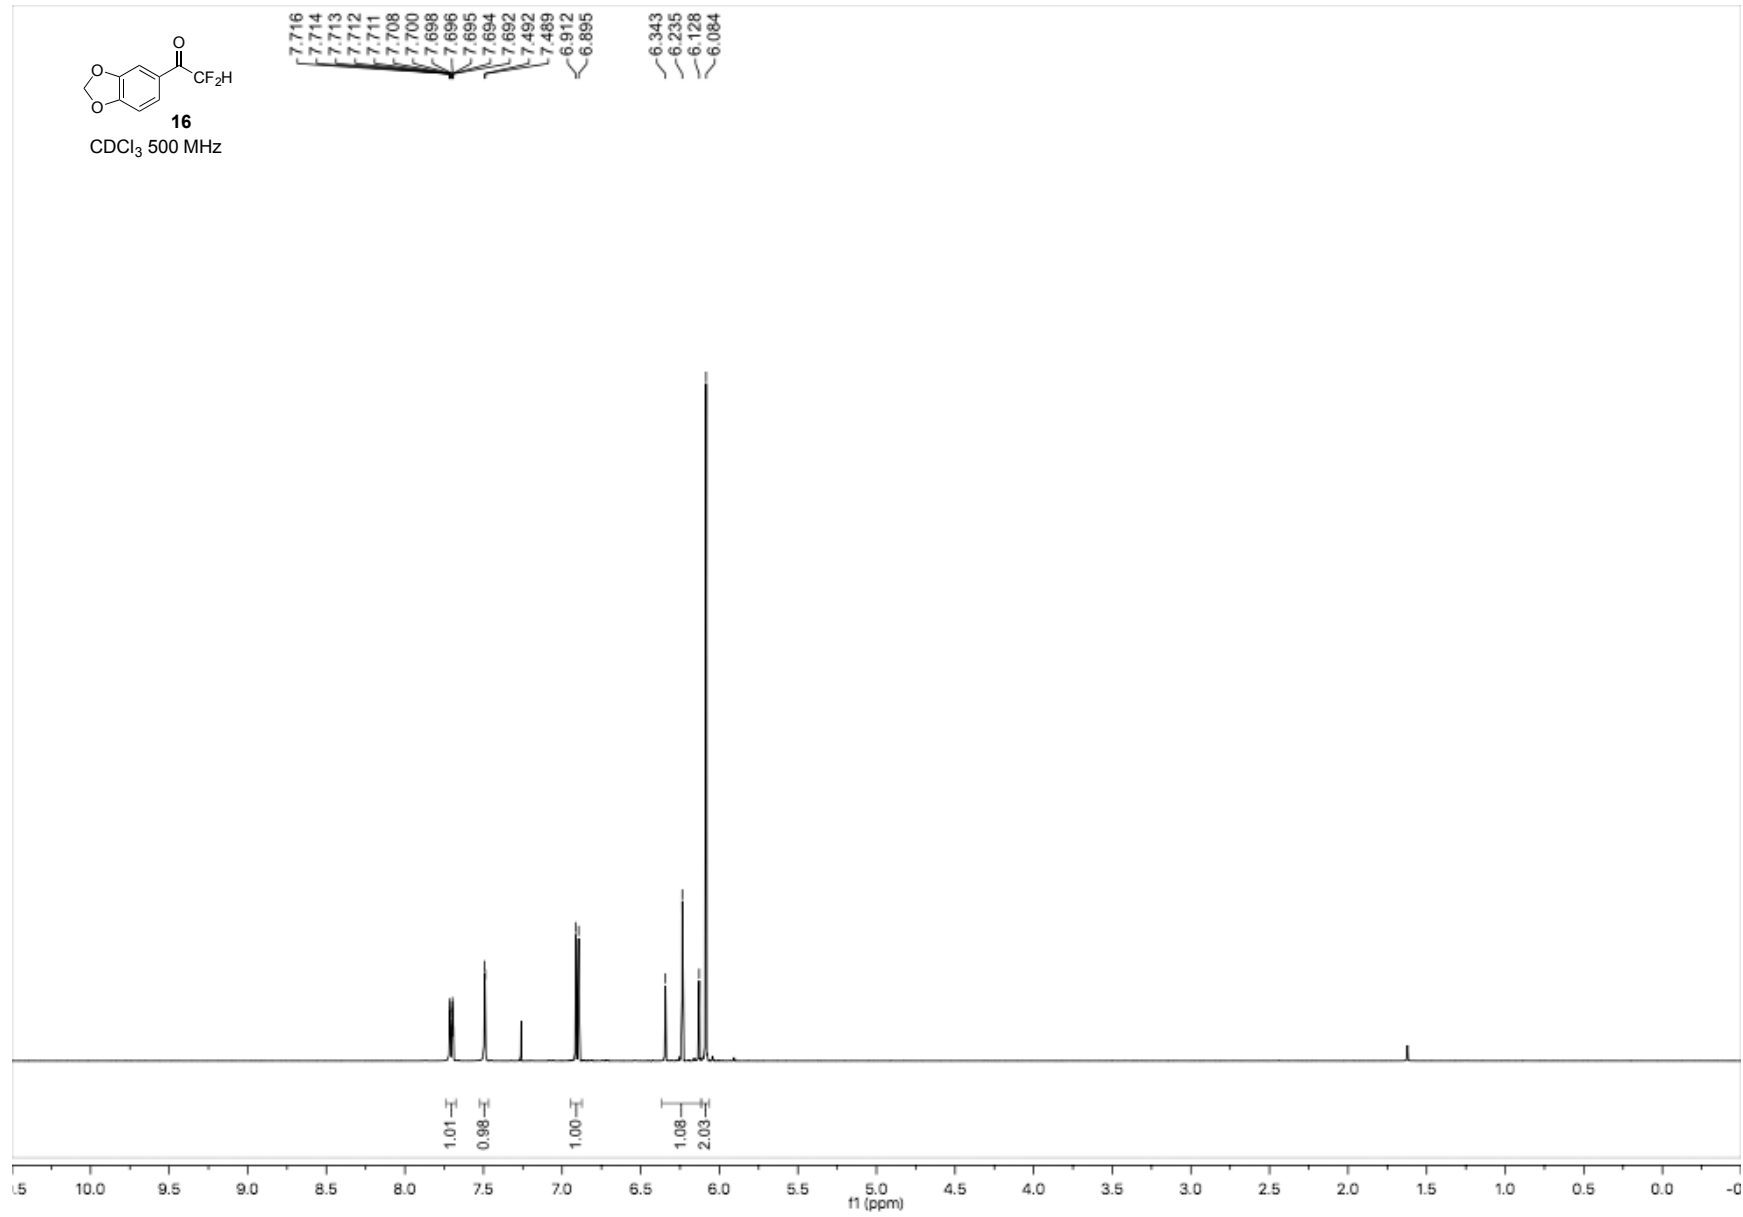



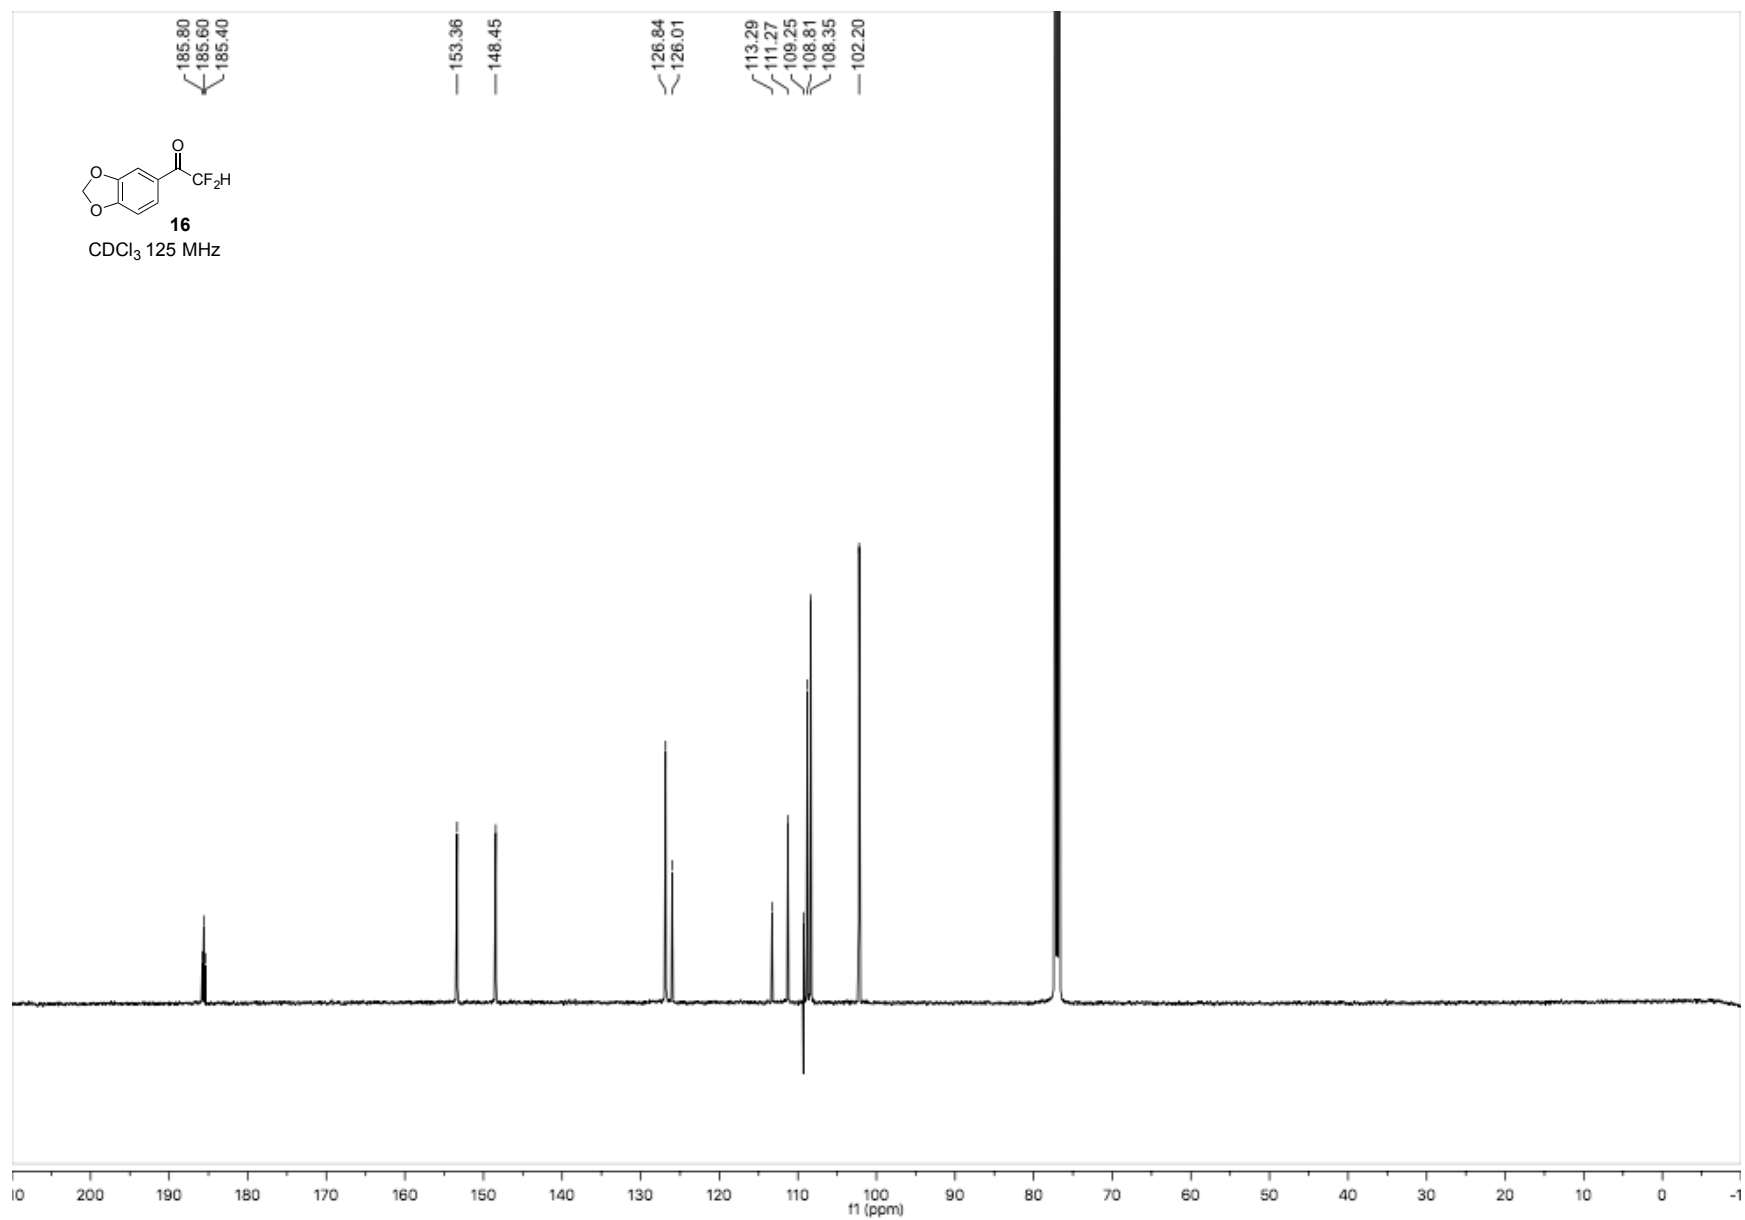

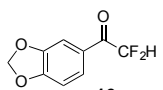

**16**

CDCl<sub>3</sub> 282 MHz

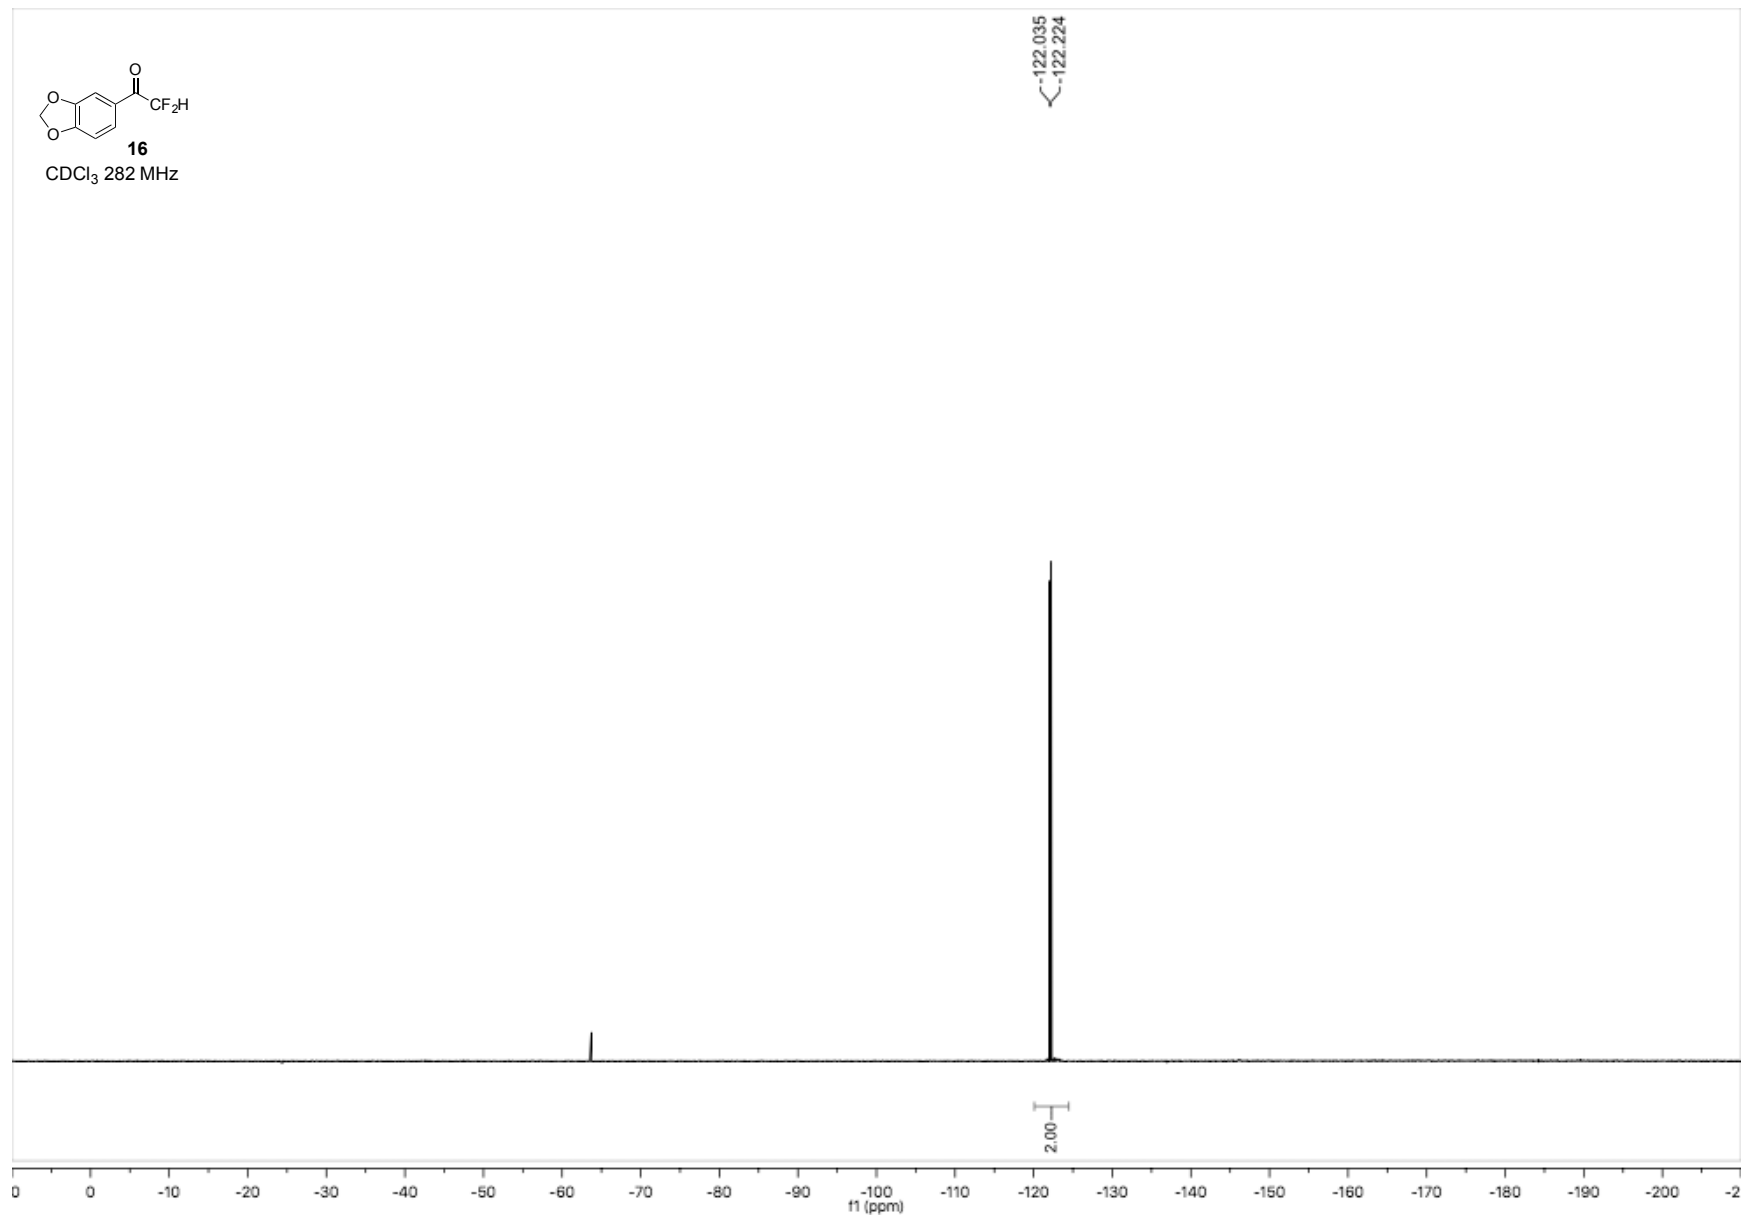

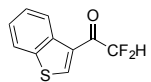

**18**

CDCl<sub>3</sub> 500 MHz

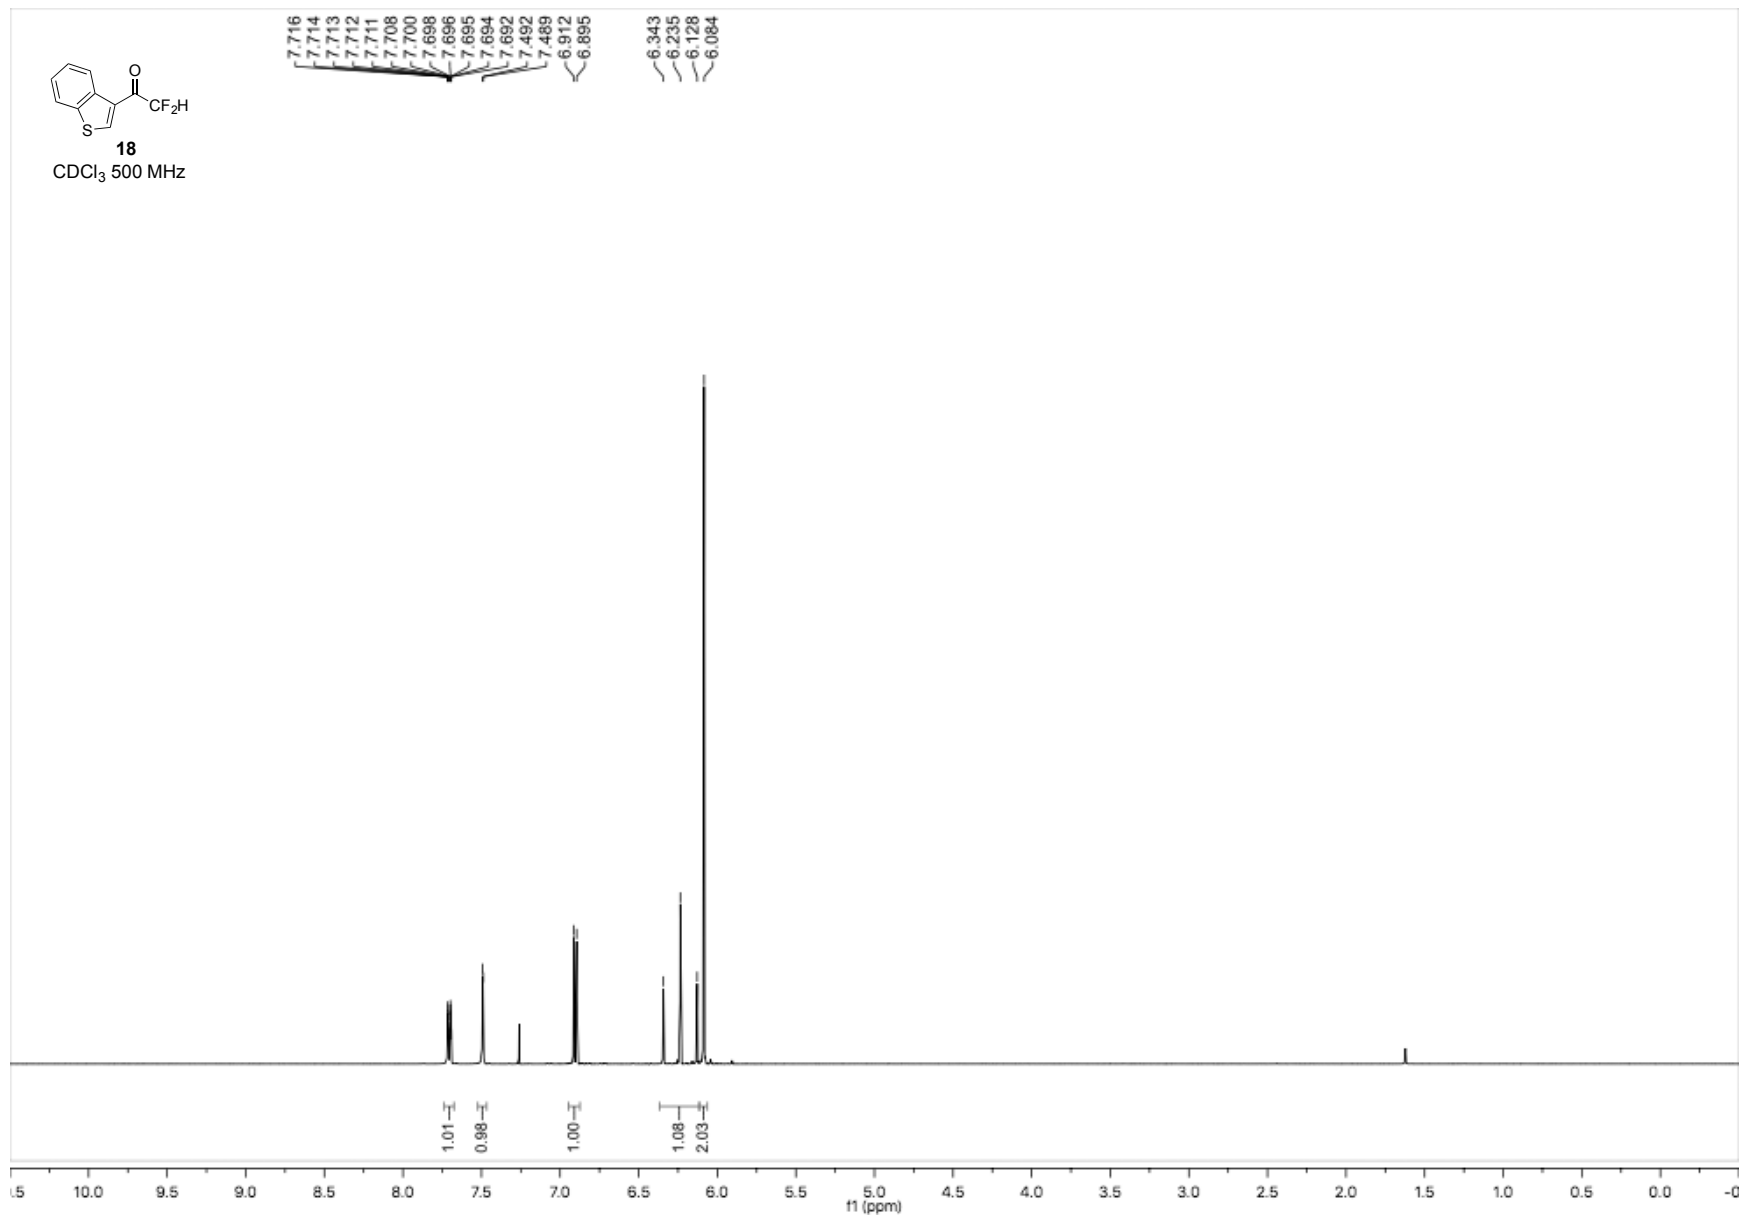

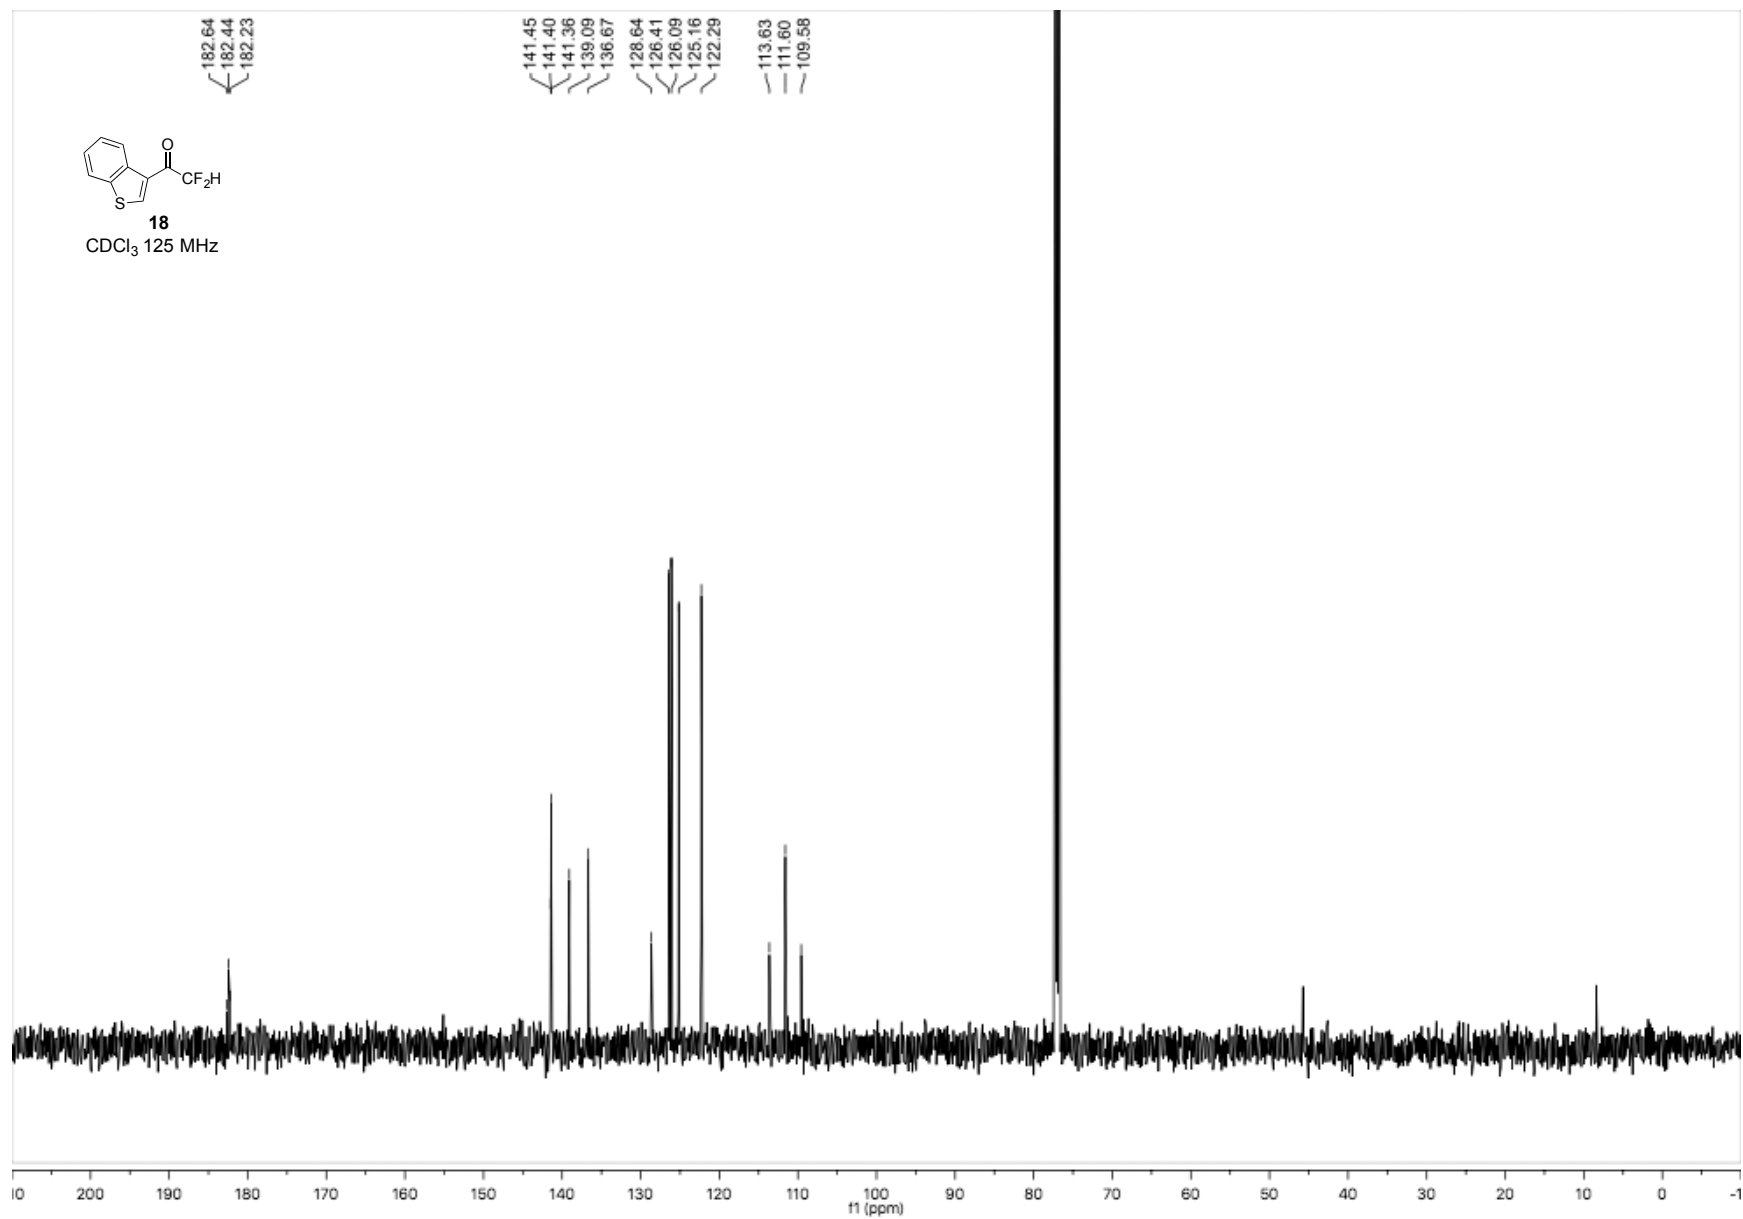

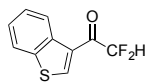

18

CDCl<sub>3</sub> 282 MHz

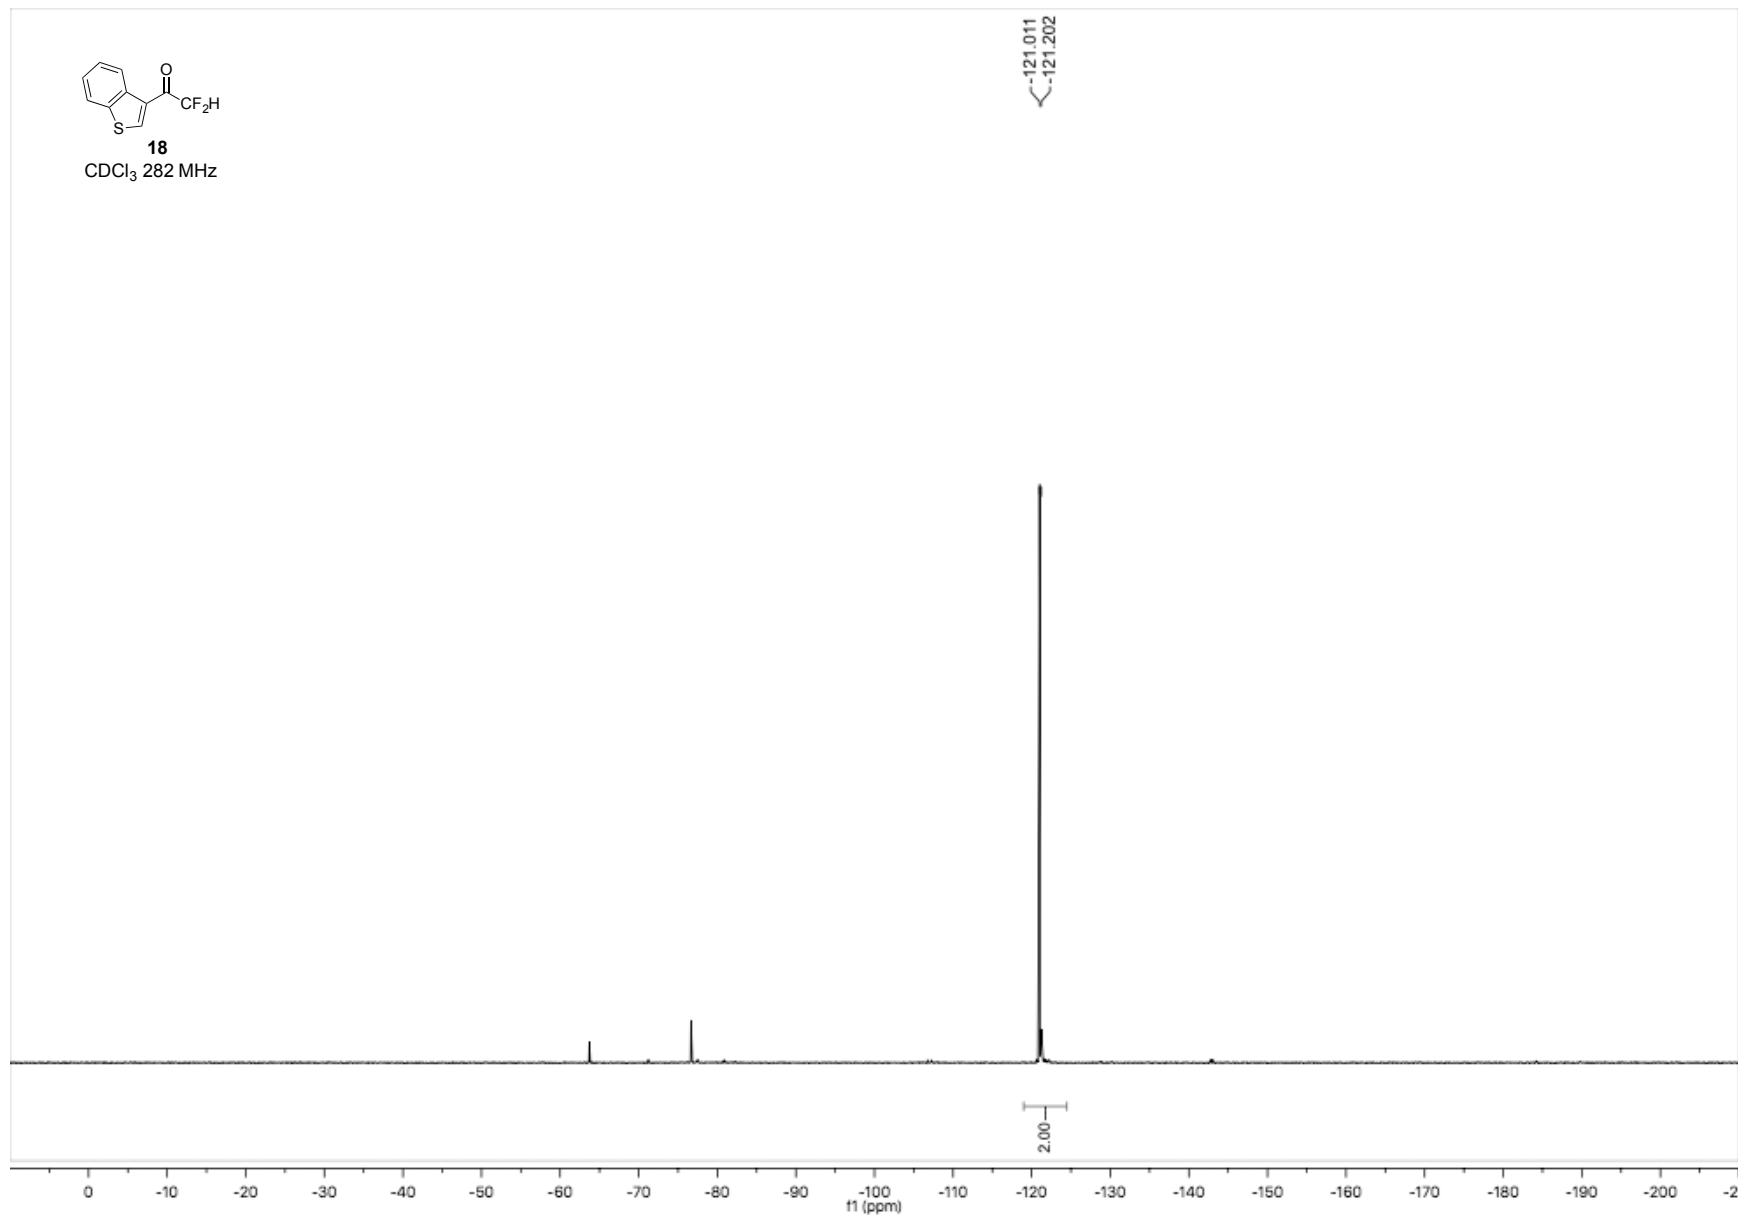

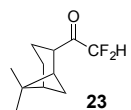

CDCl<sub>3</sub> 500 MHz

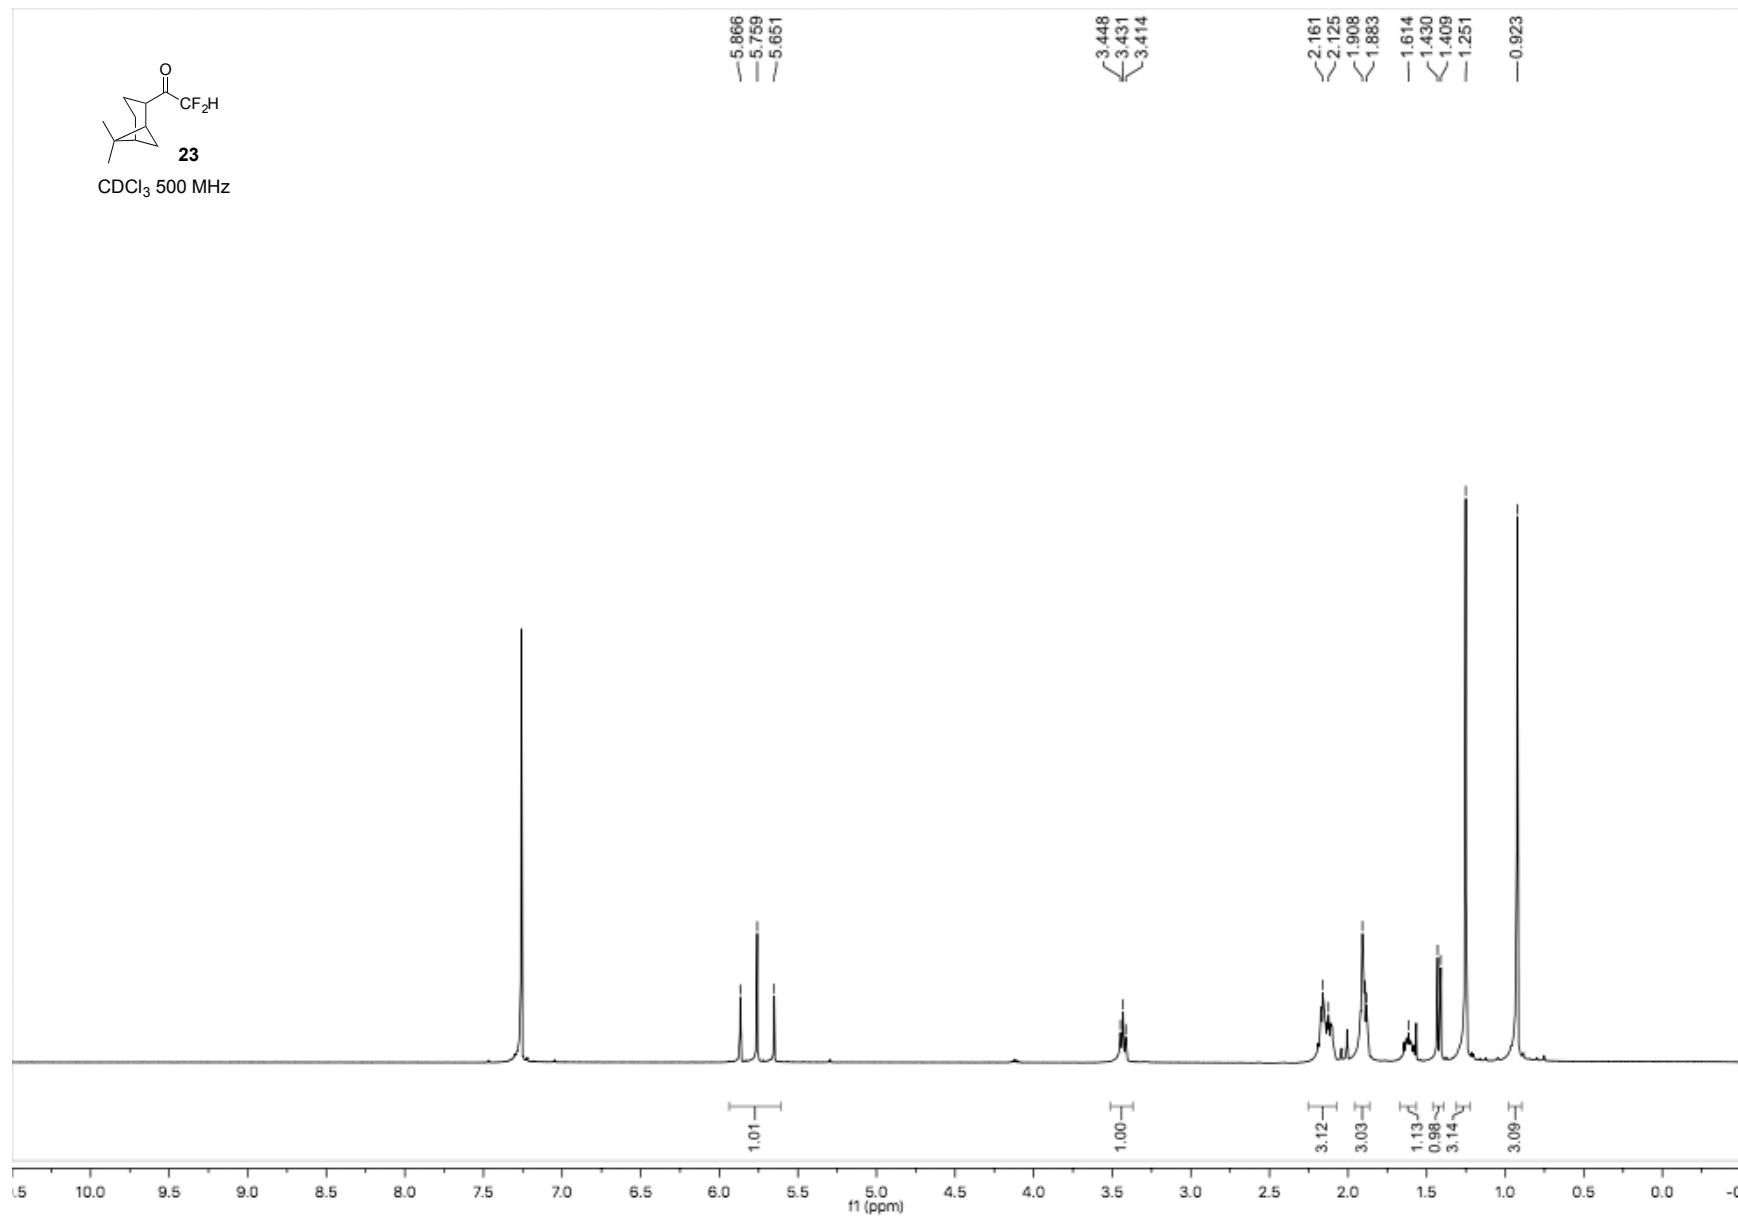

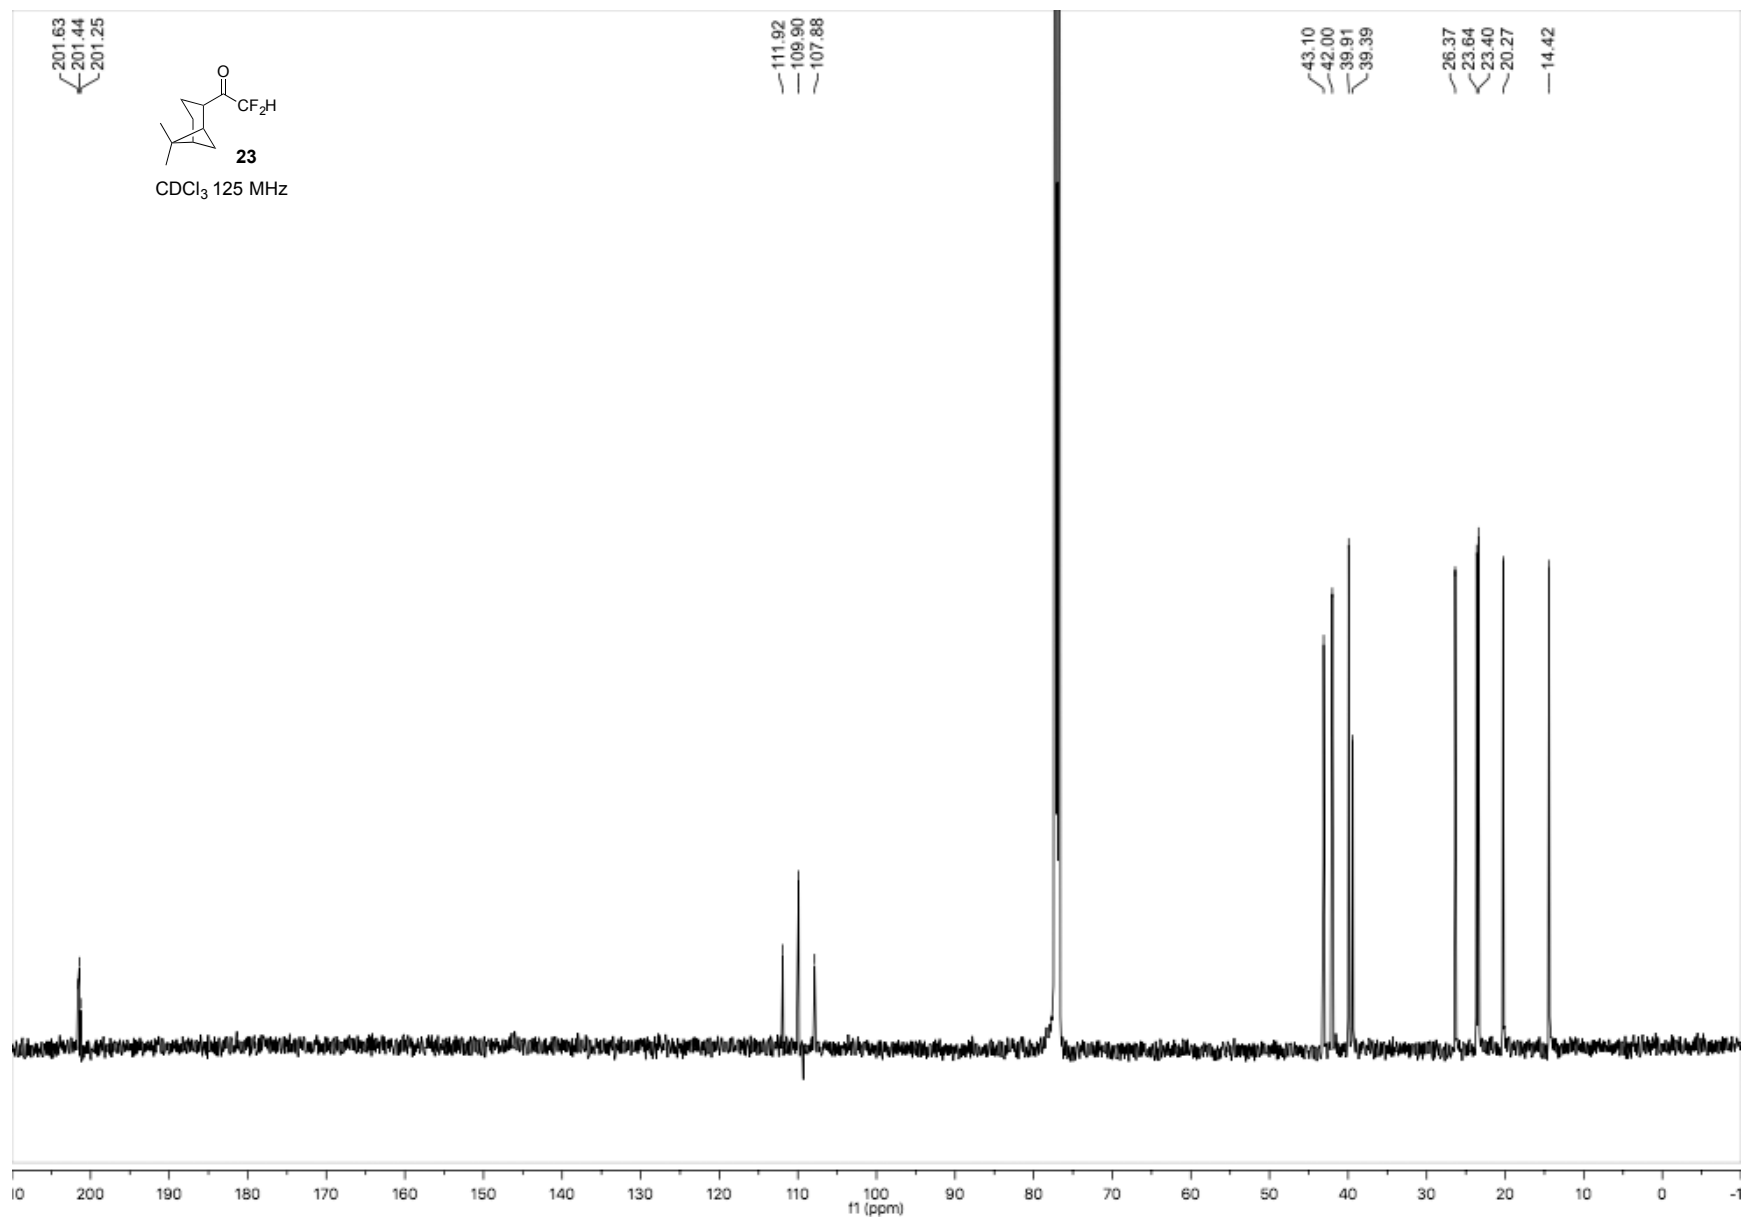

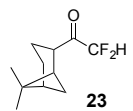

CDCl<sub>3</sub> 282 MHz

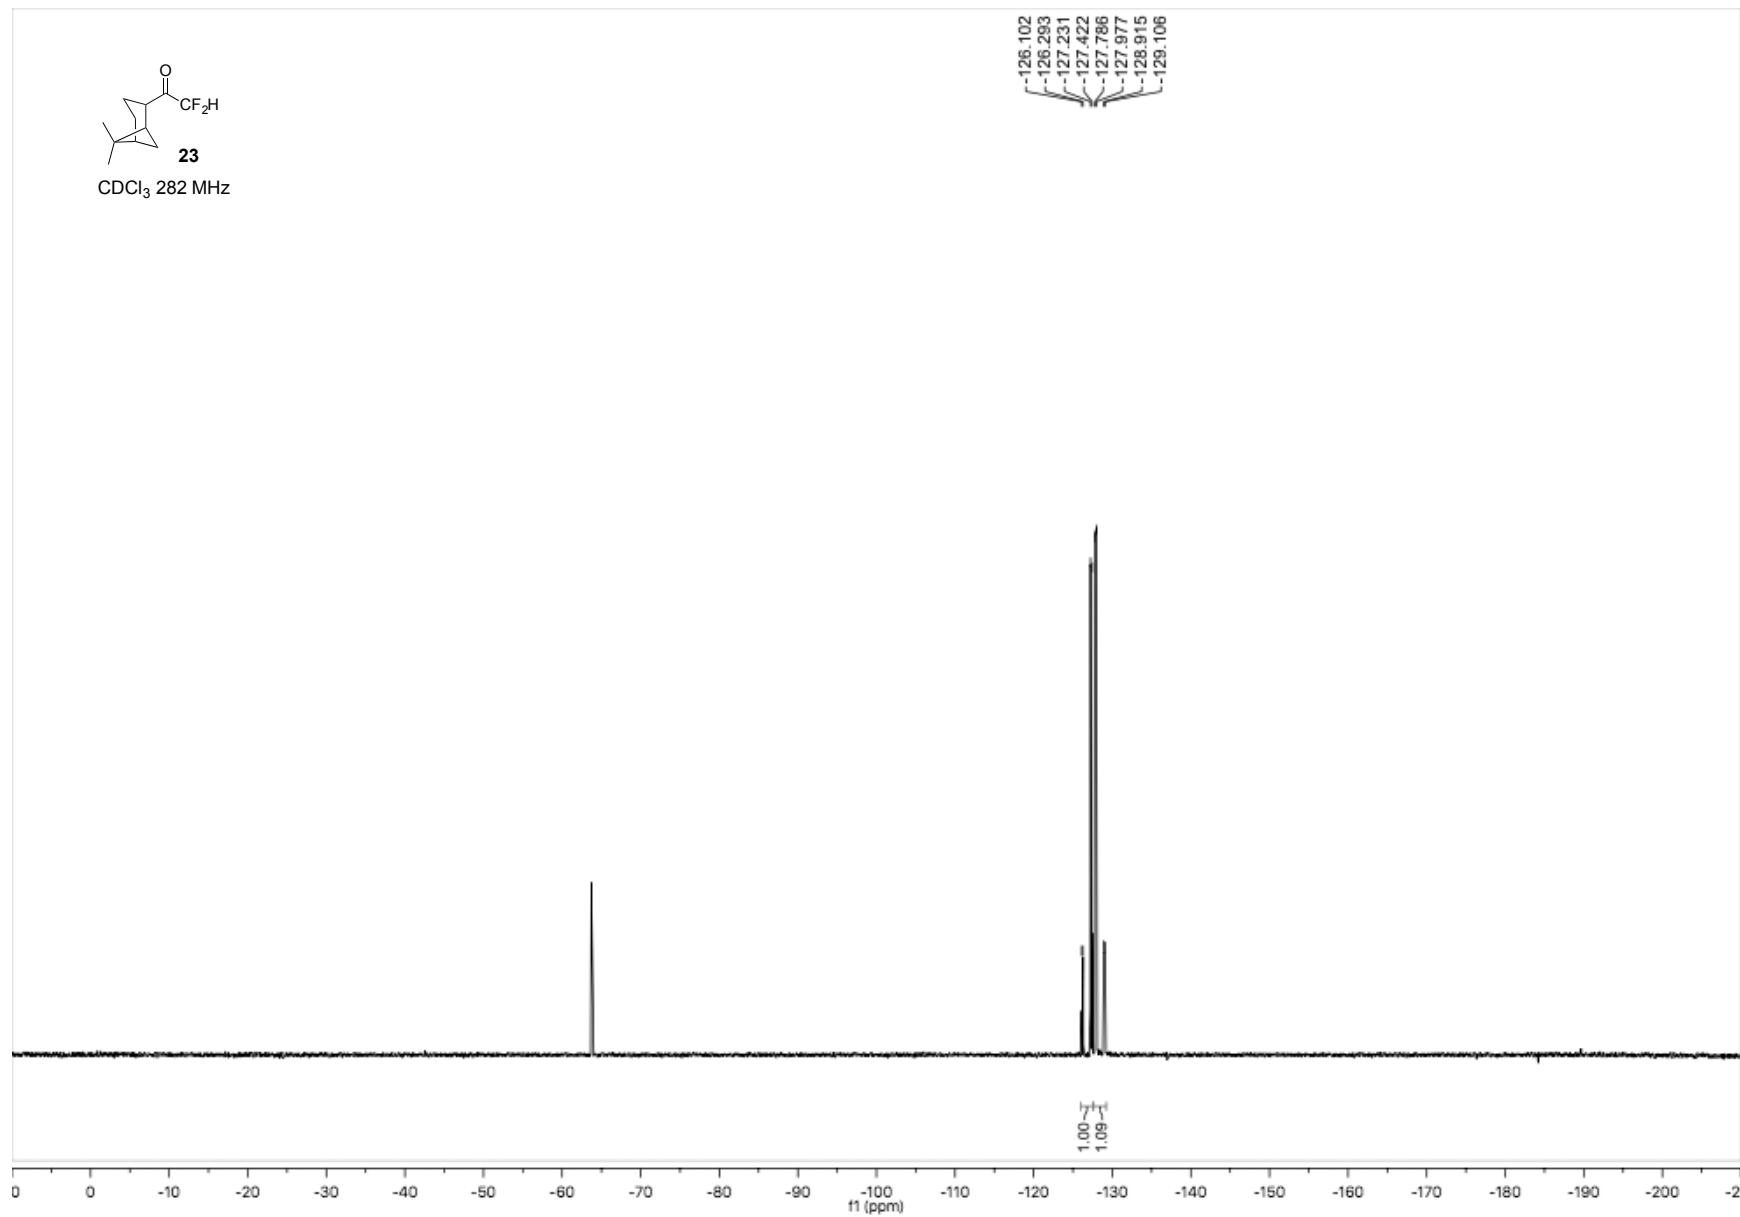





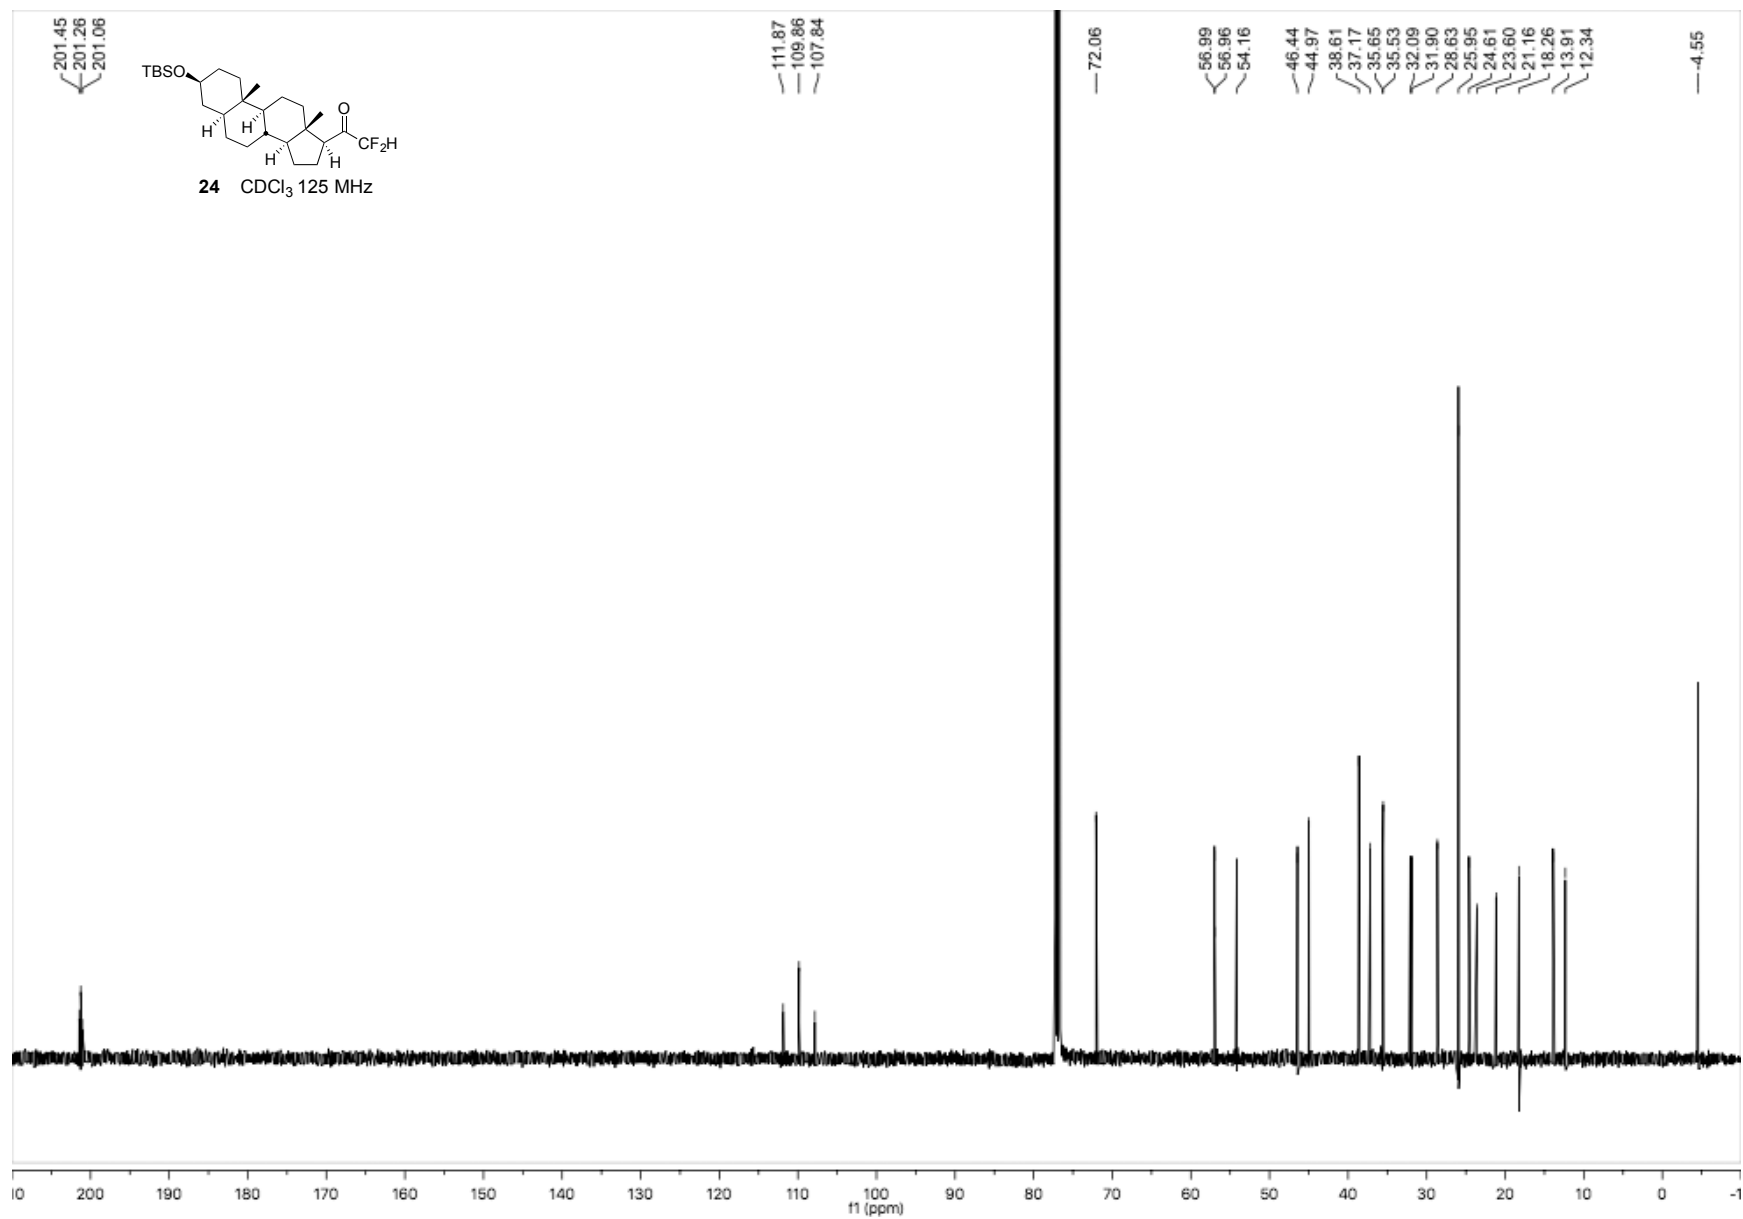

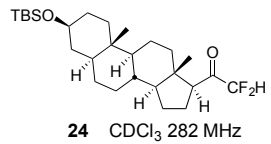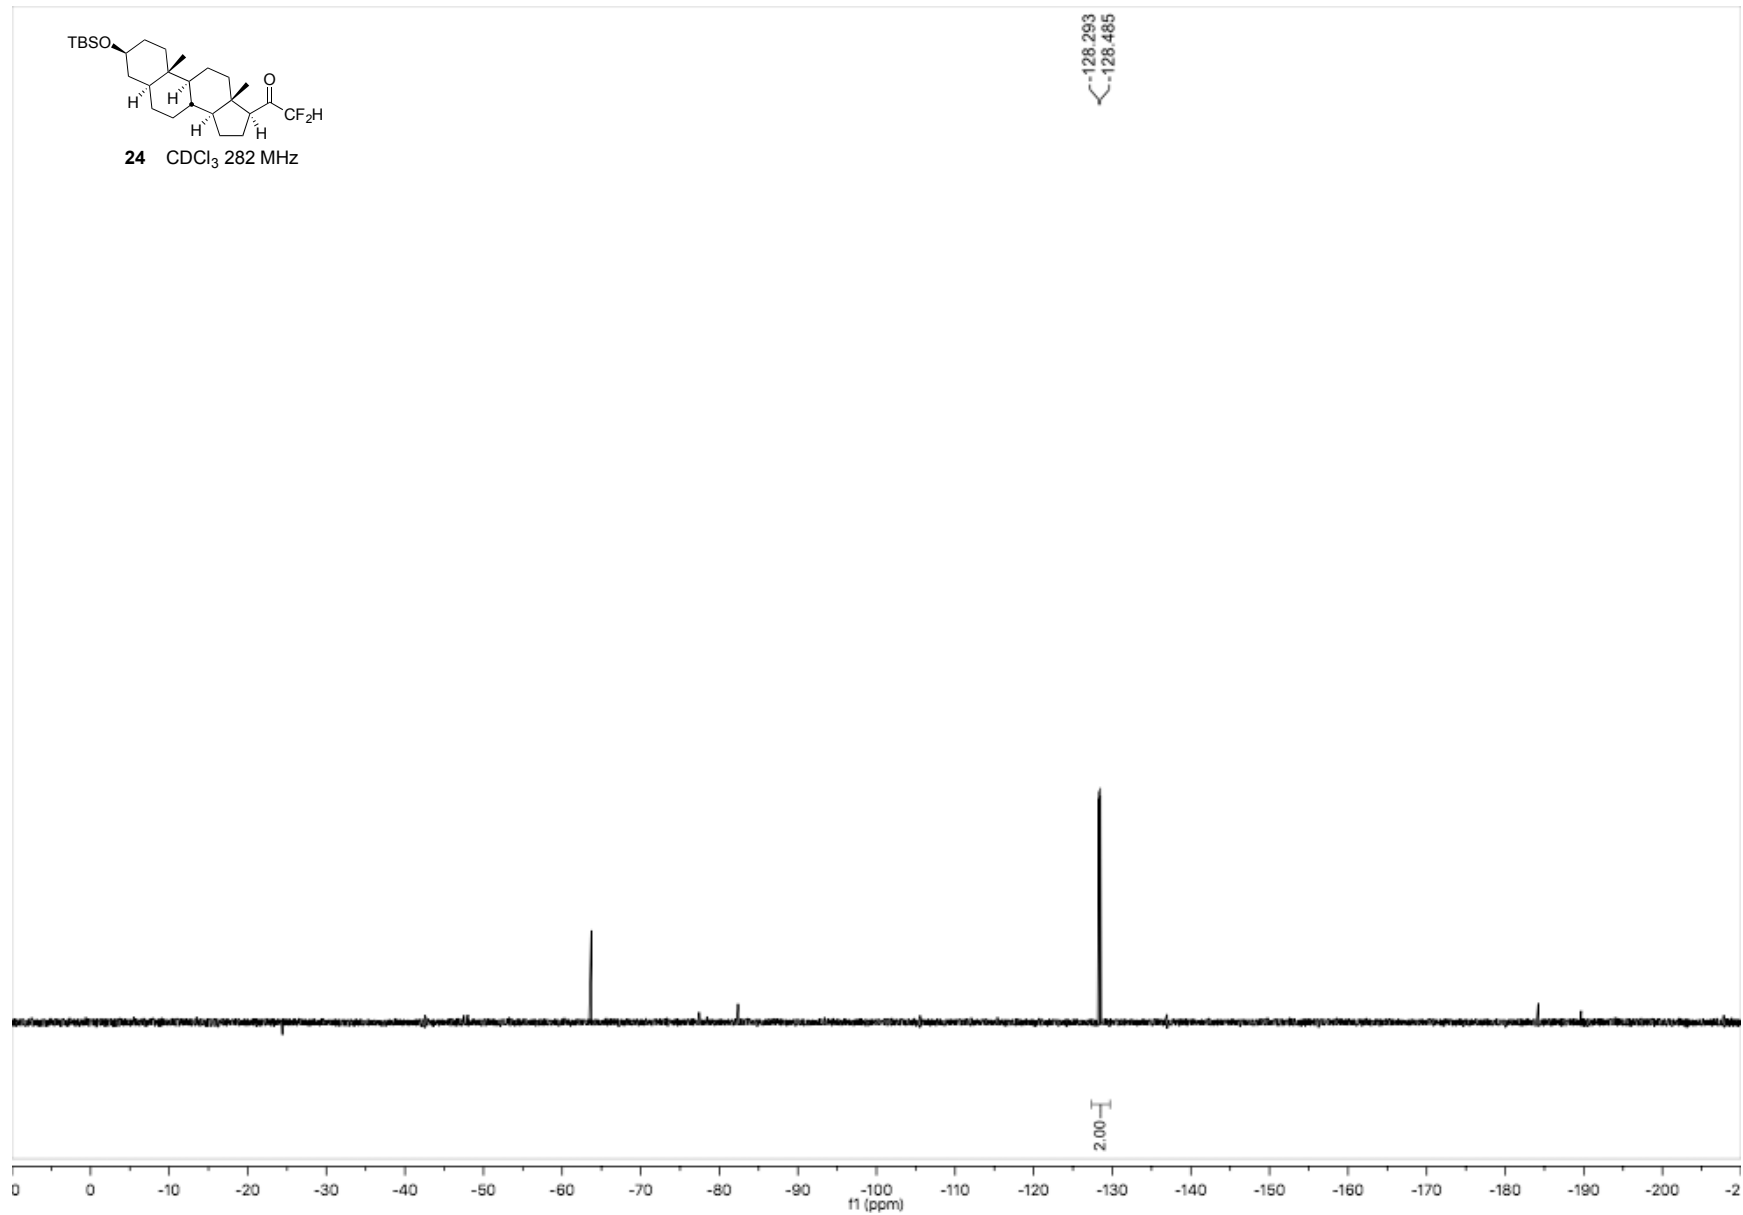

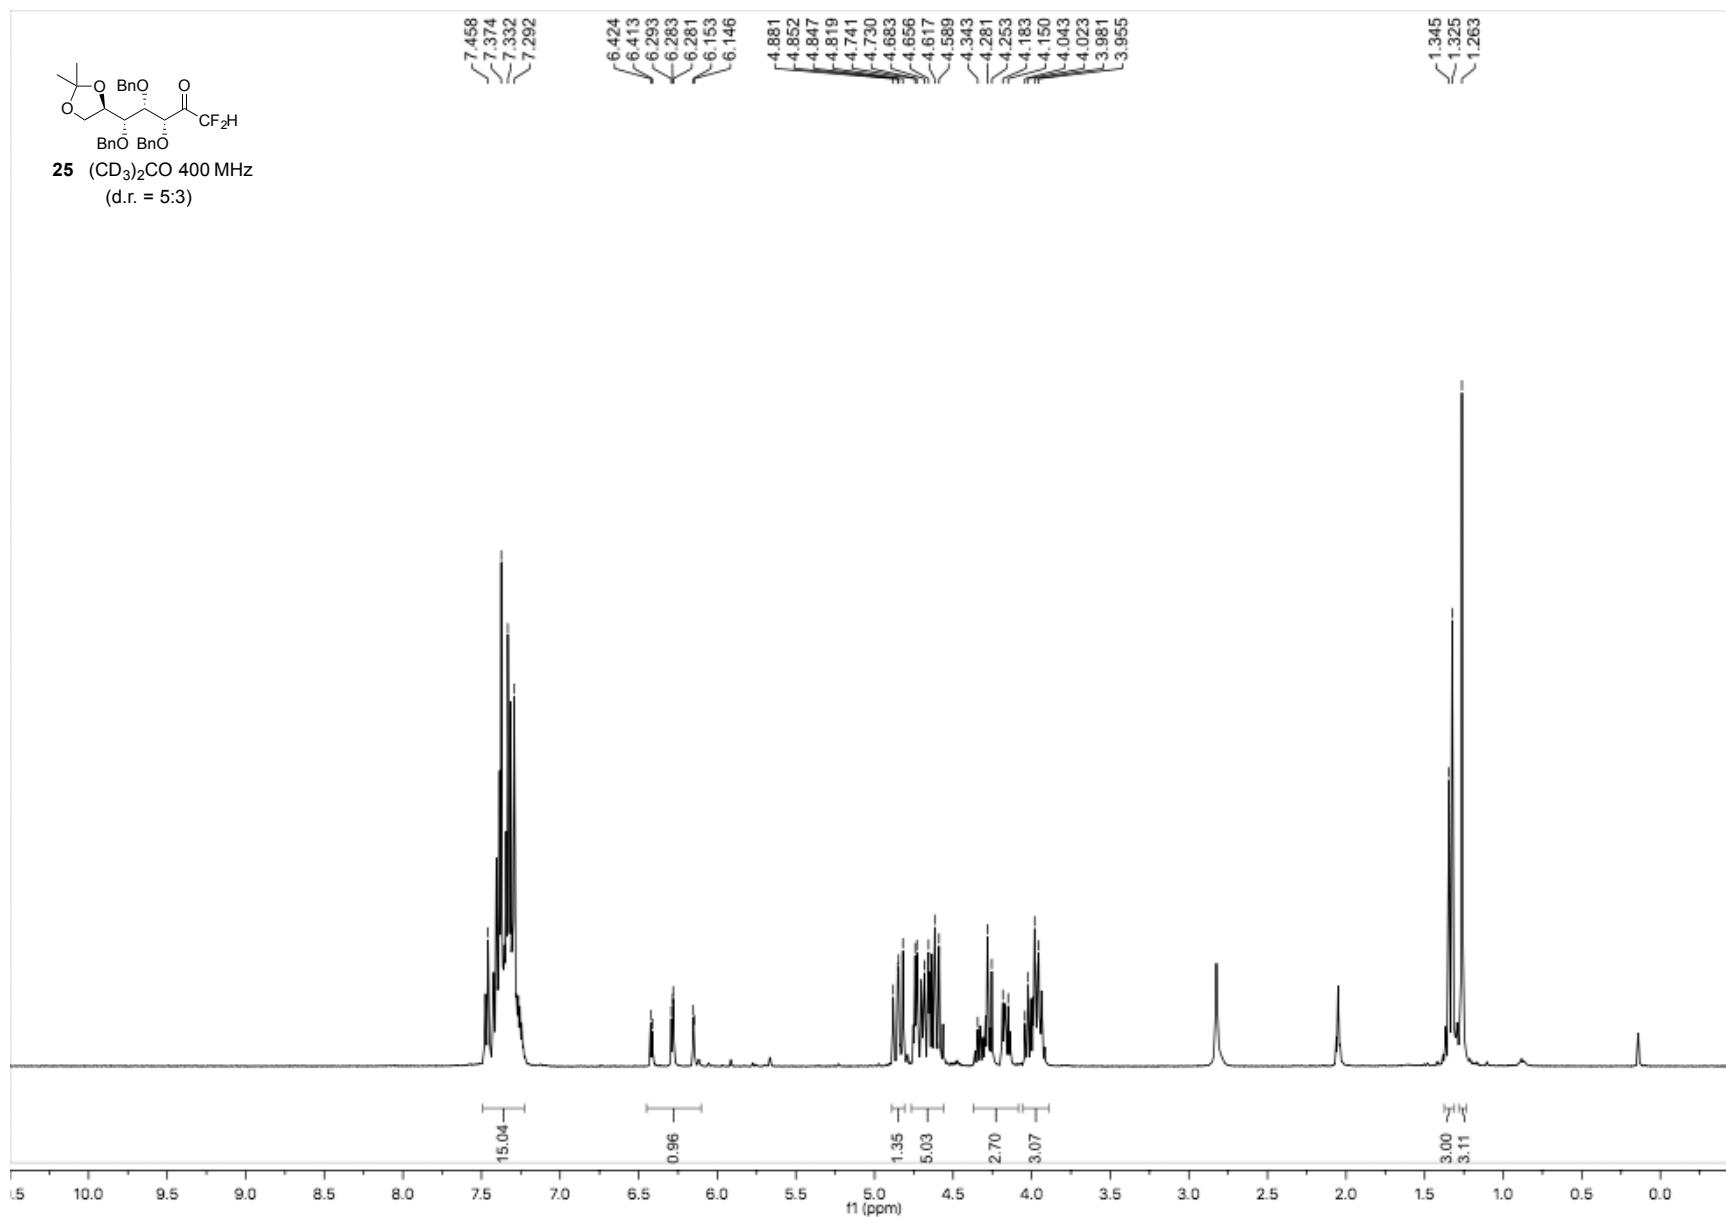

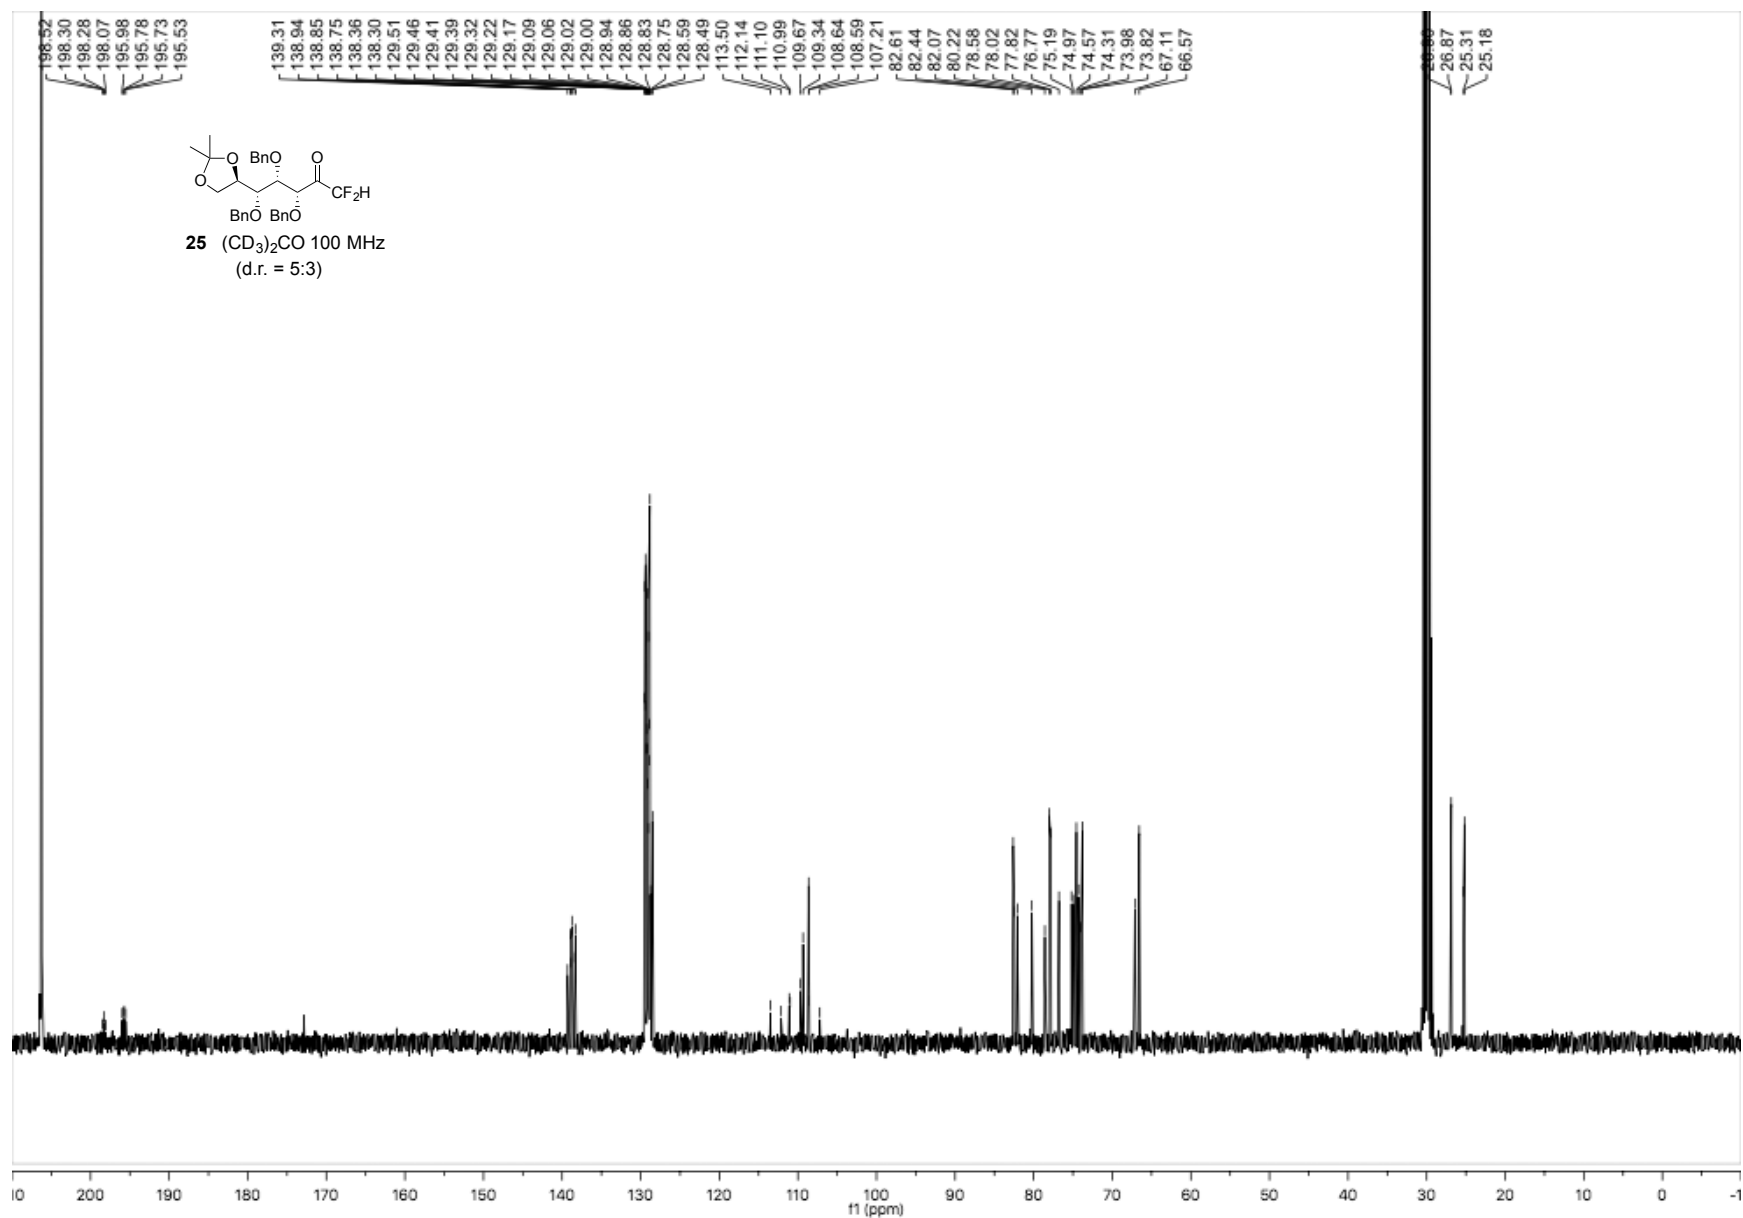

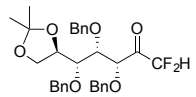

**25** (CD<sub>3</sub>)<sub>2</sub>CO 376 MHz  
(d.r. = 5:3)

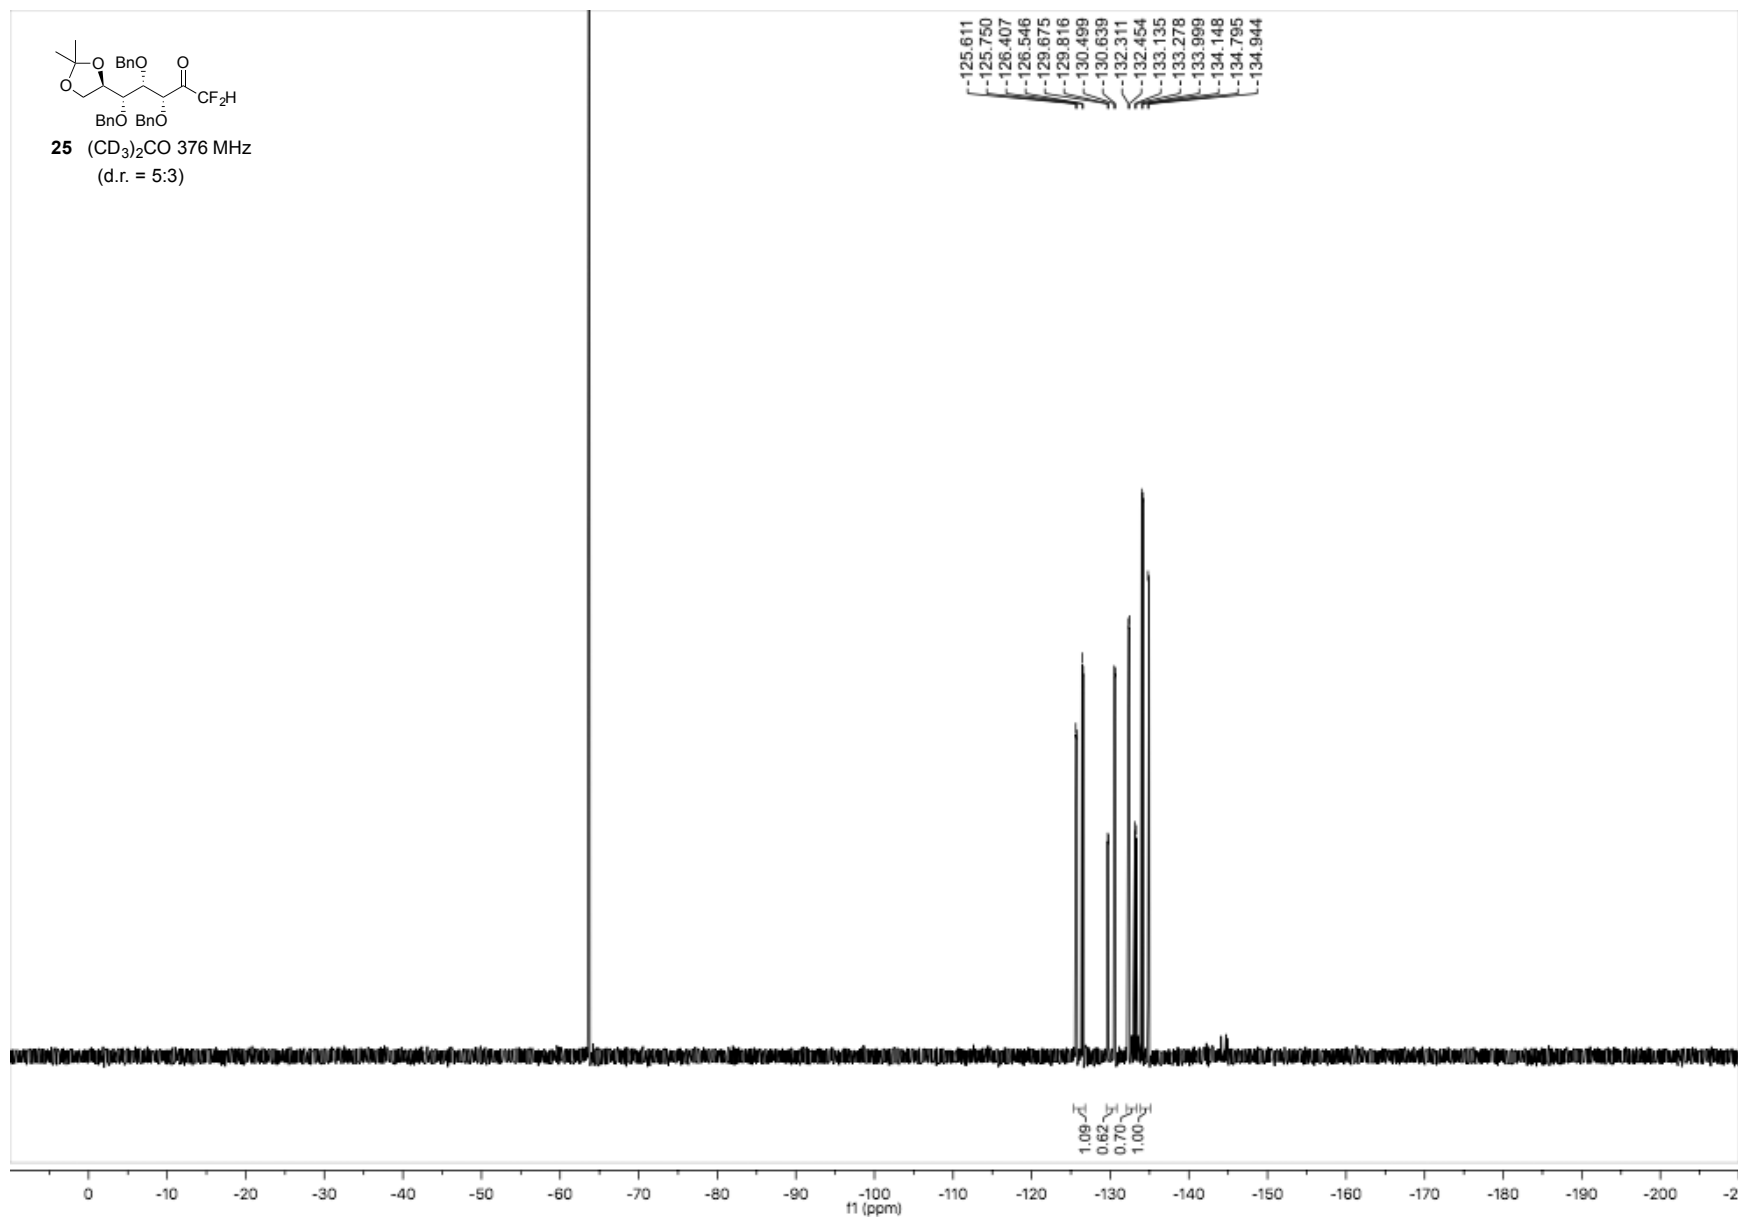

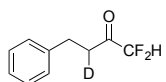

26 CDCl<sub>3</sub> 500 MHz

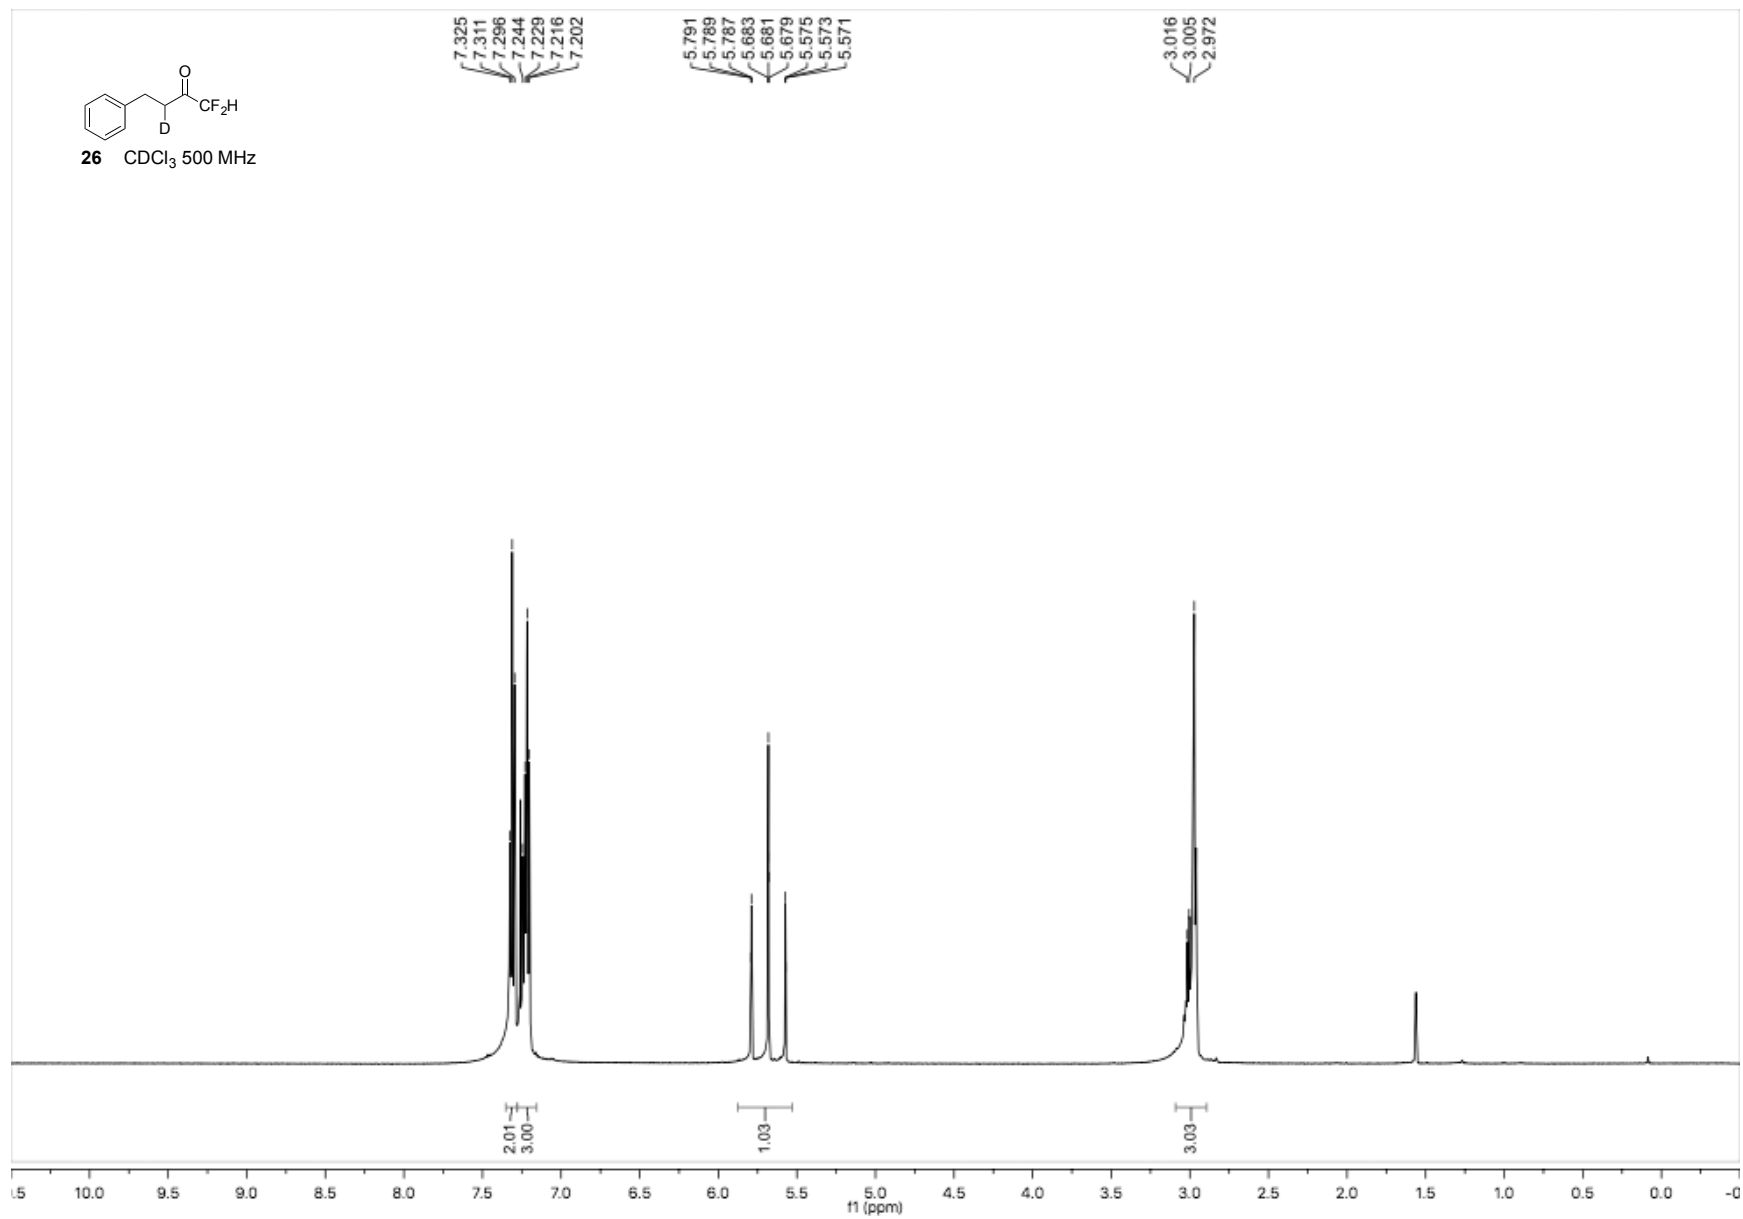

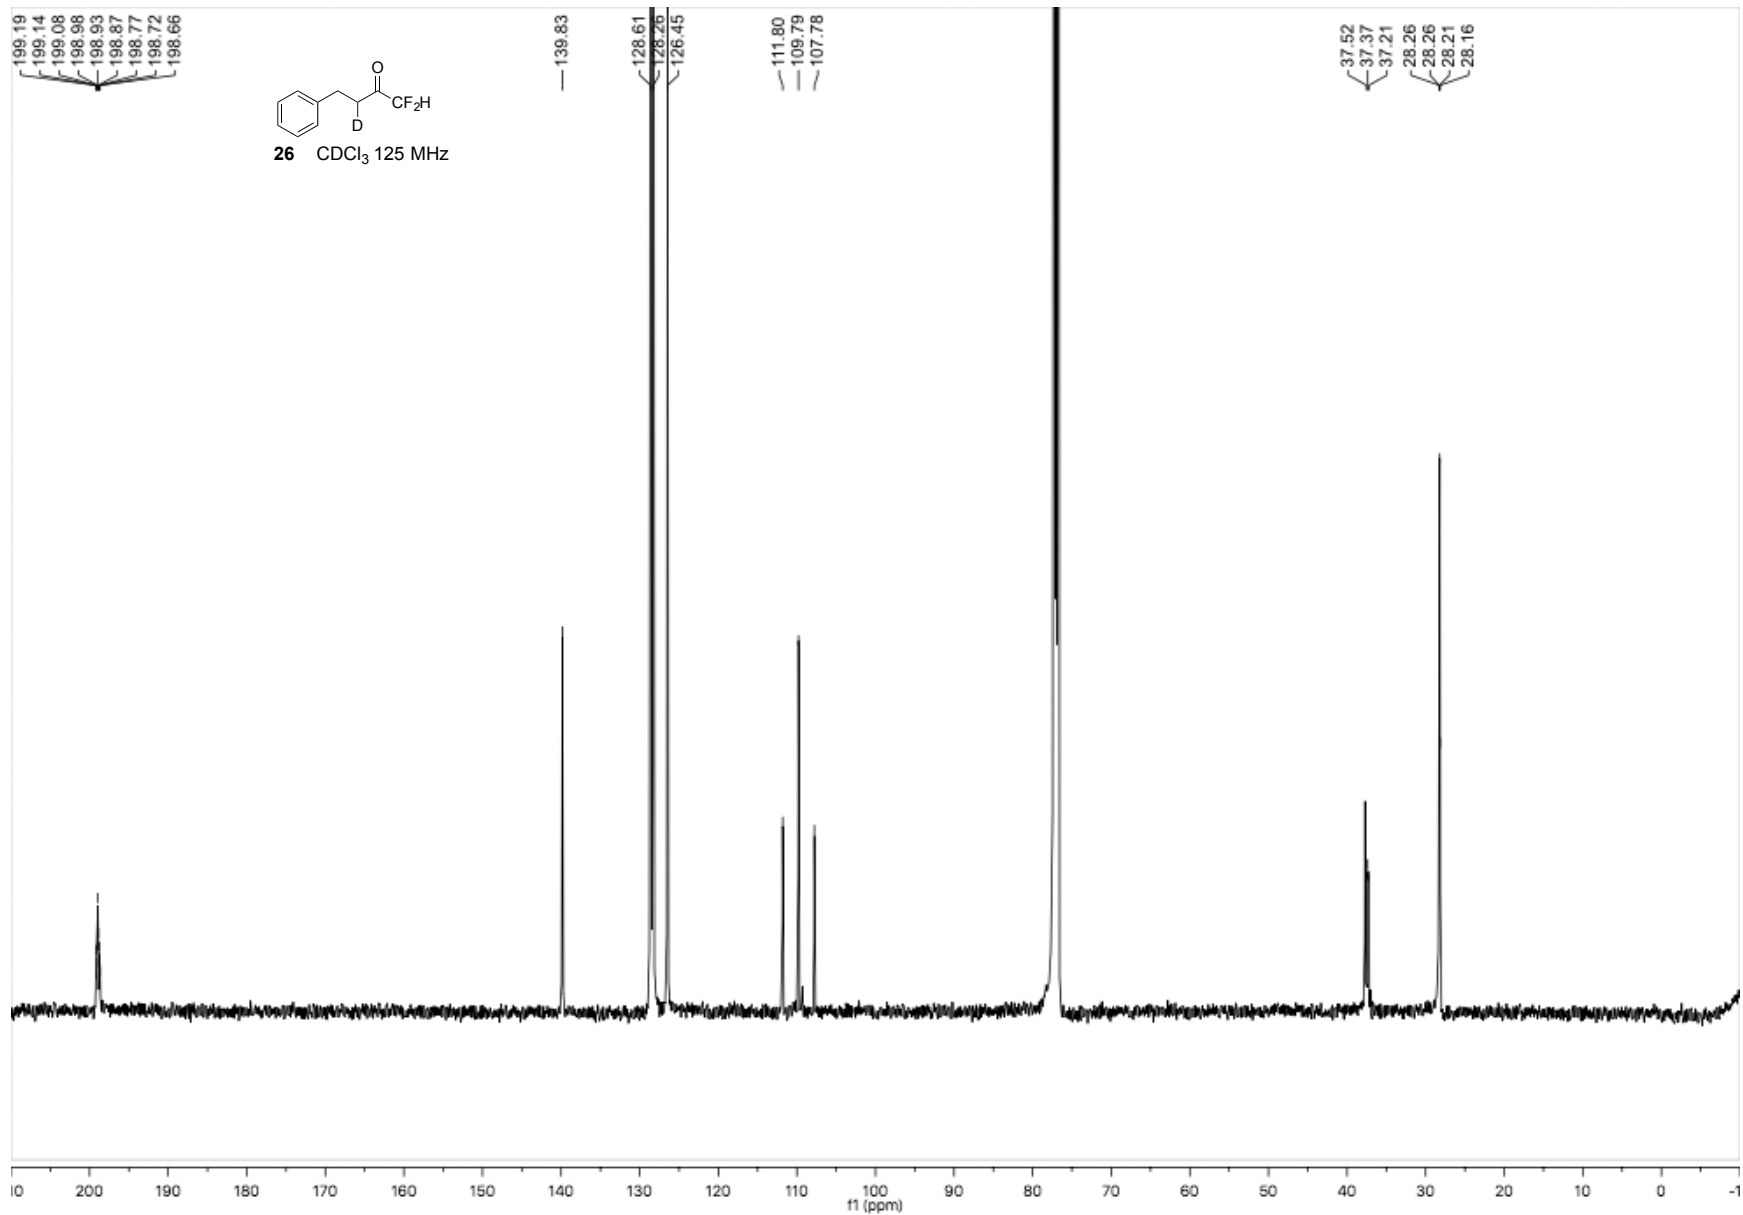



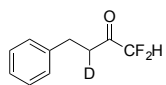

26 CDCl<sub>3</sub> 282 MHz

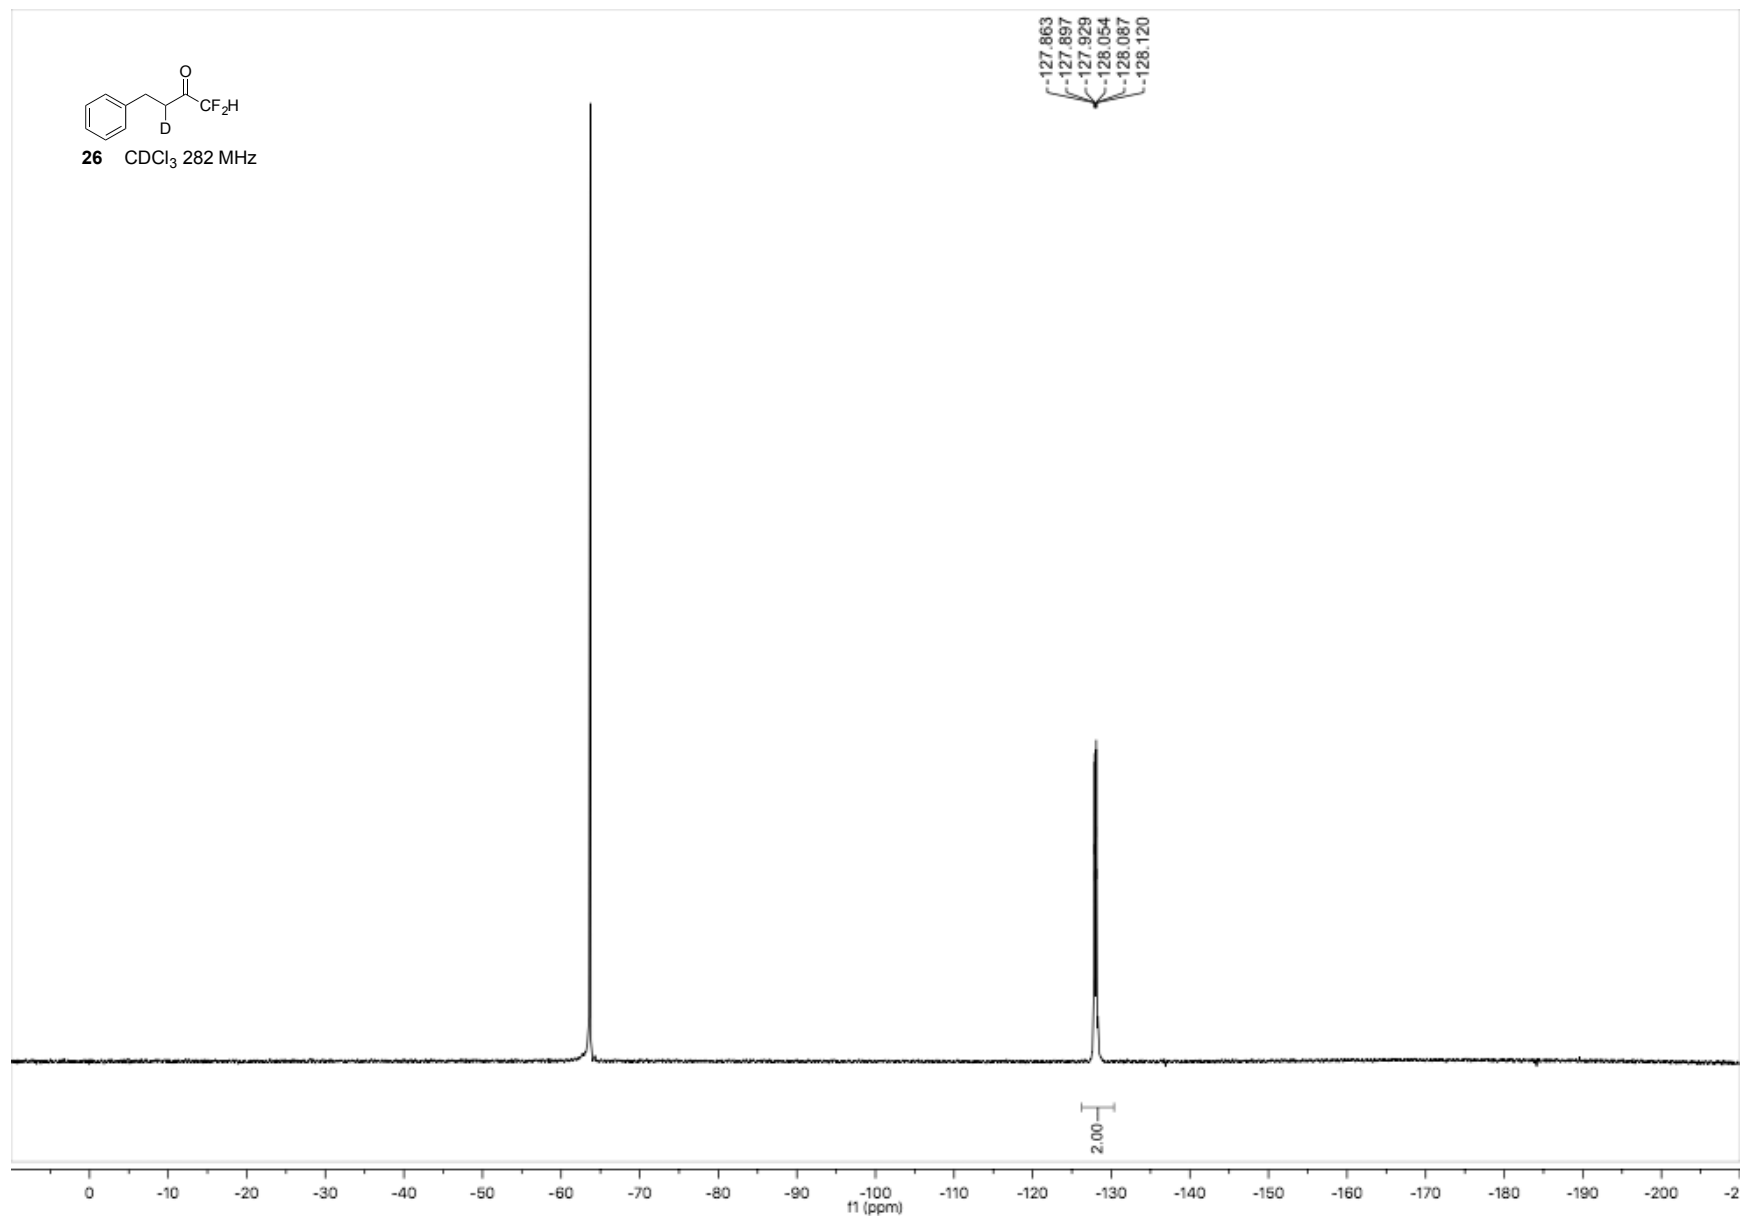

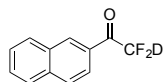

27 CDCl<sub>3</sub> 300 MHz

8.642  
8.088  
8.059  
8.010  
7.983  
7.950  
7.921  
7.881  
7.698  
7.670  
7.648  
7.619  
7.597  
7.570

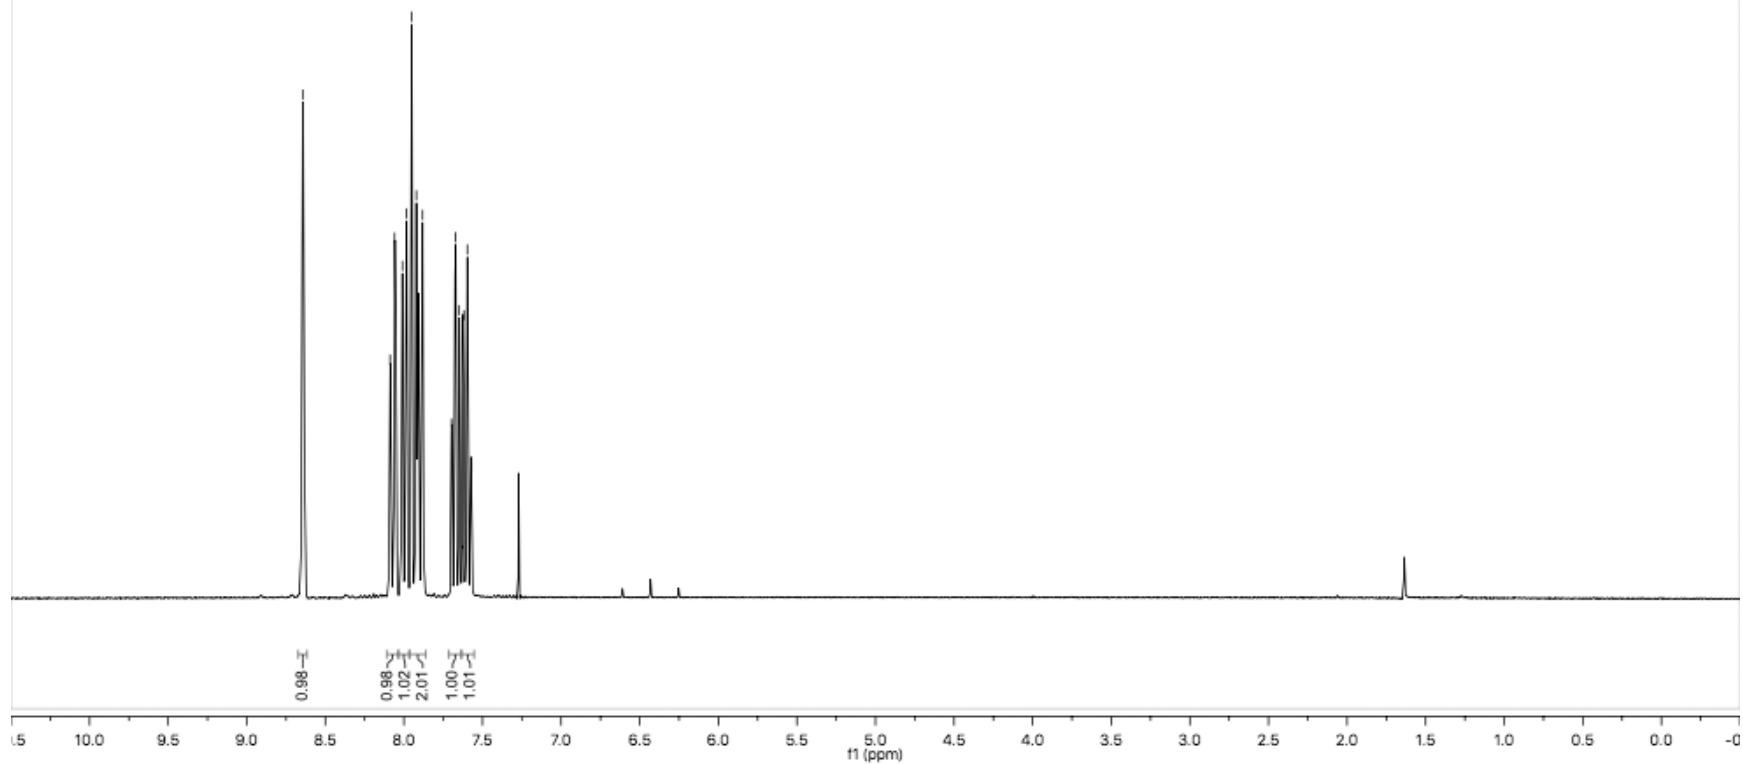

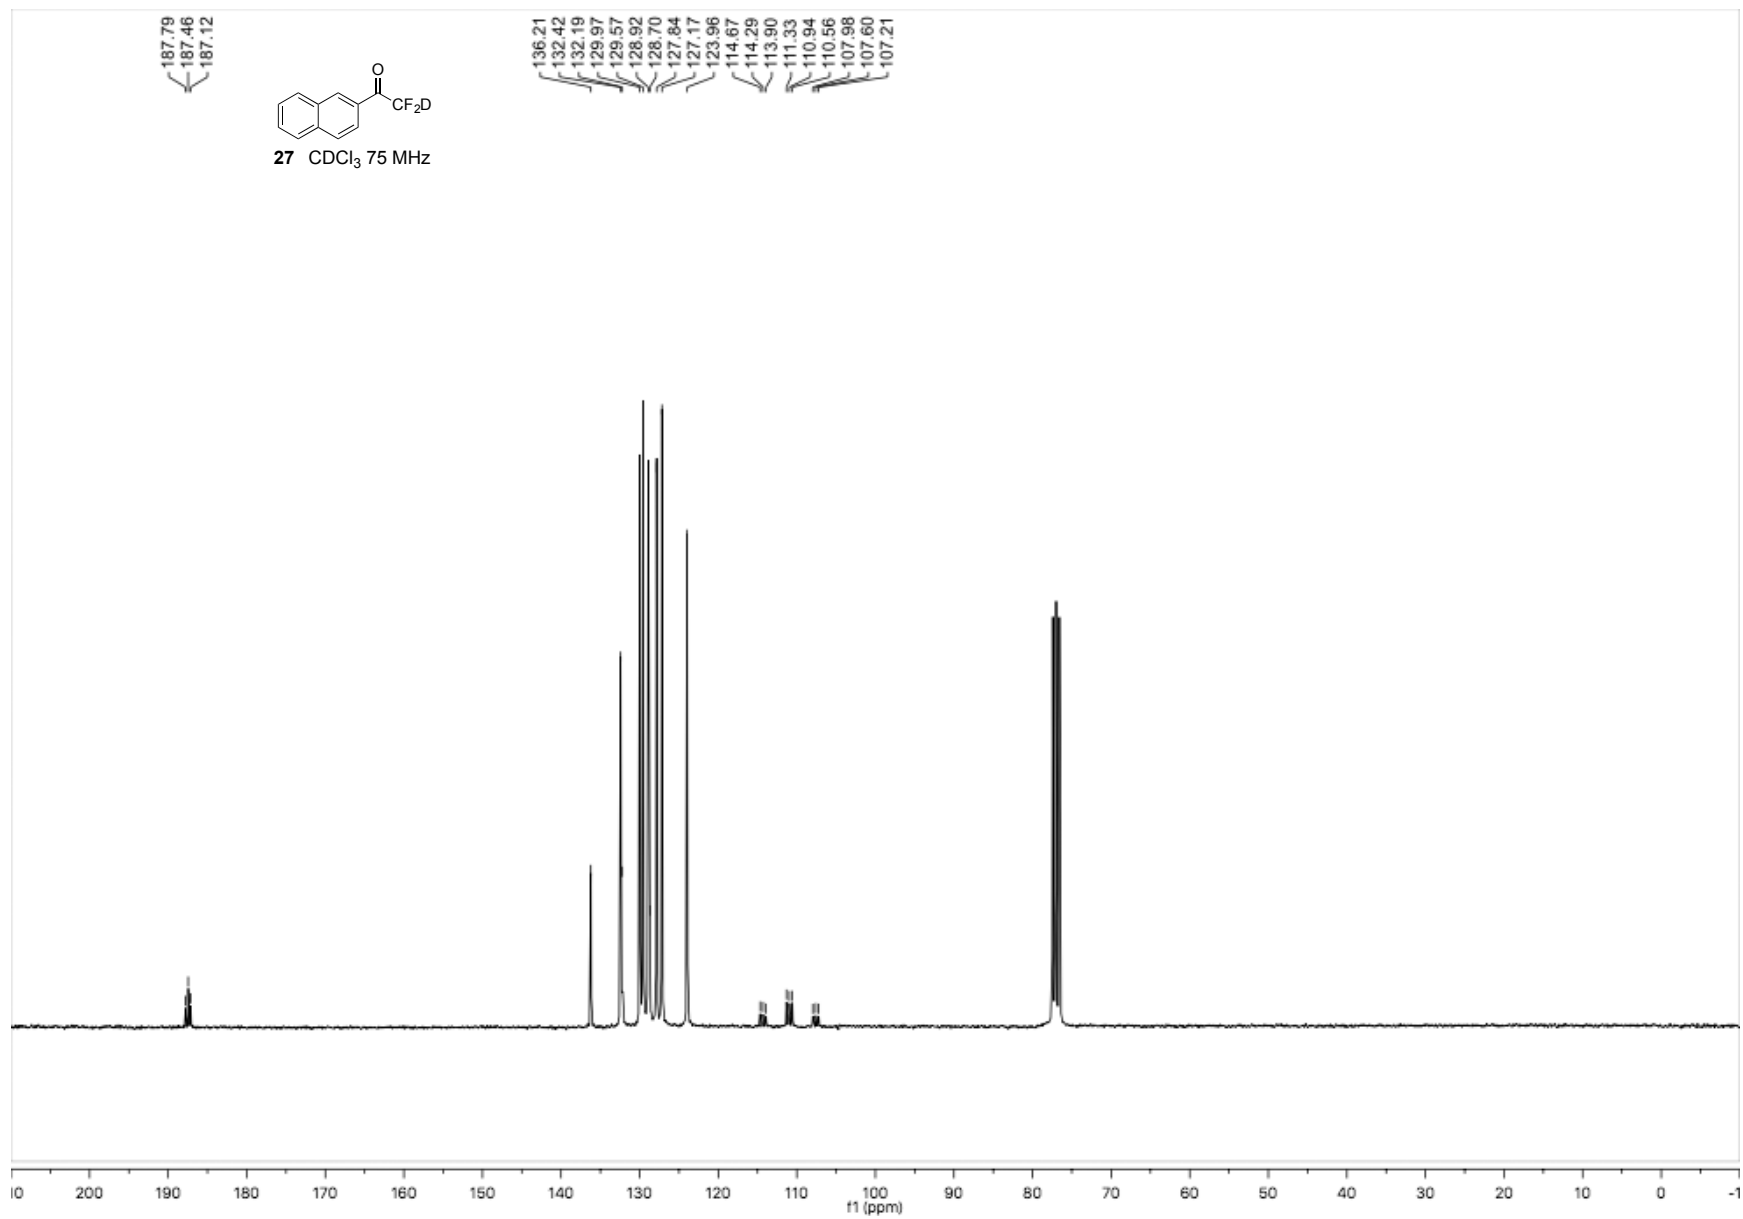

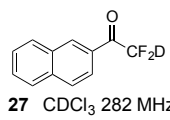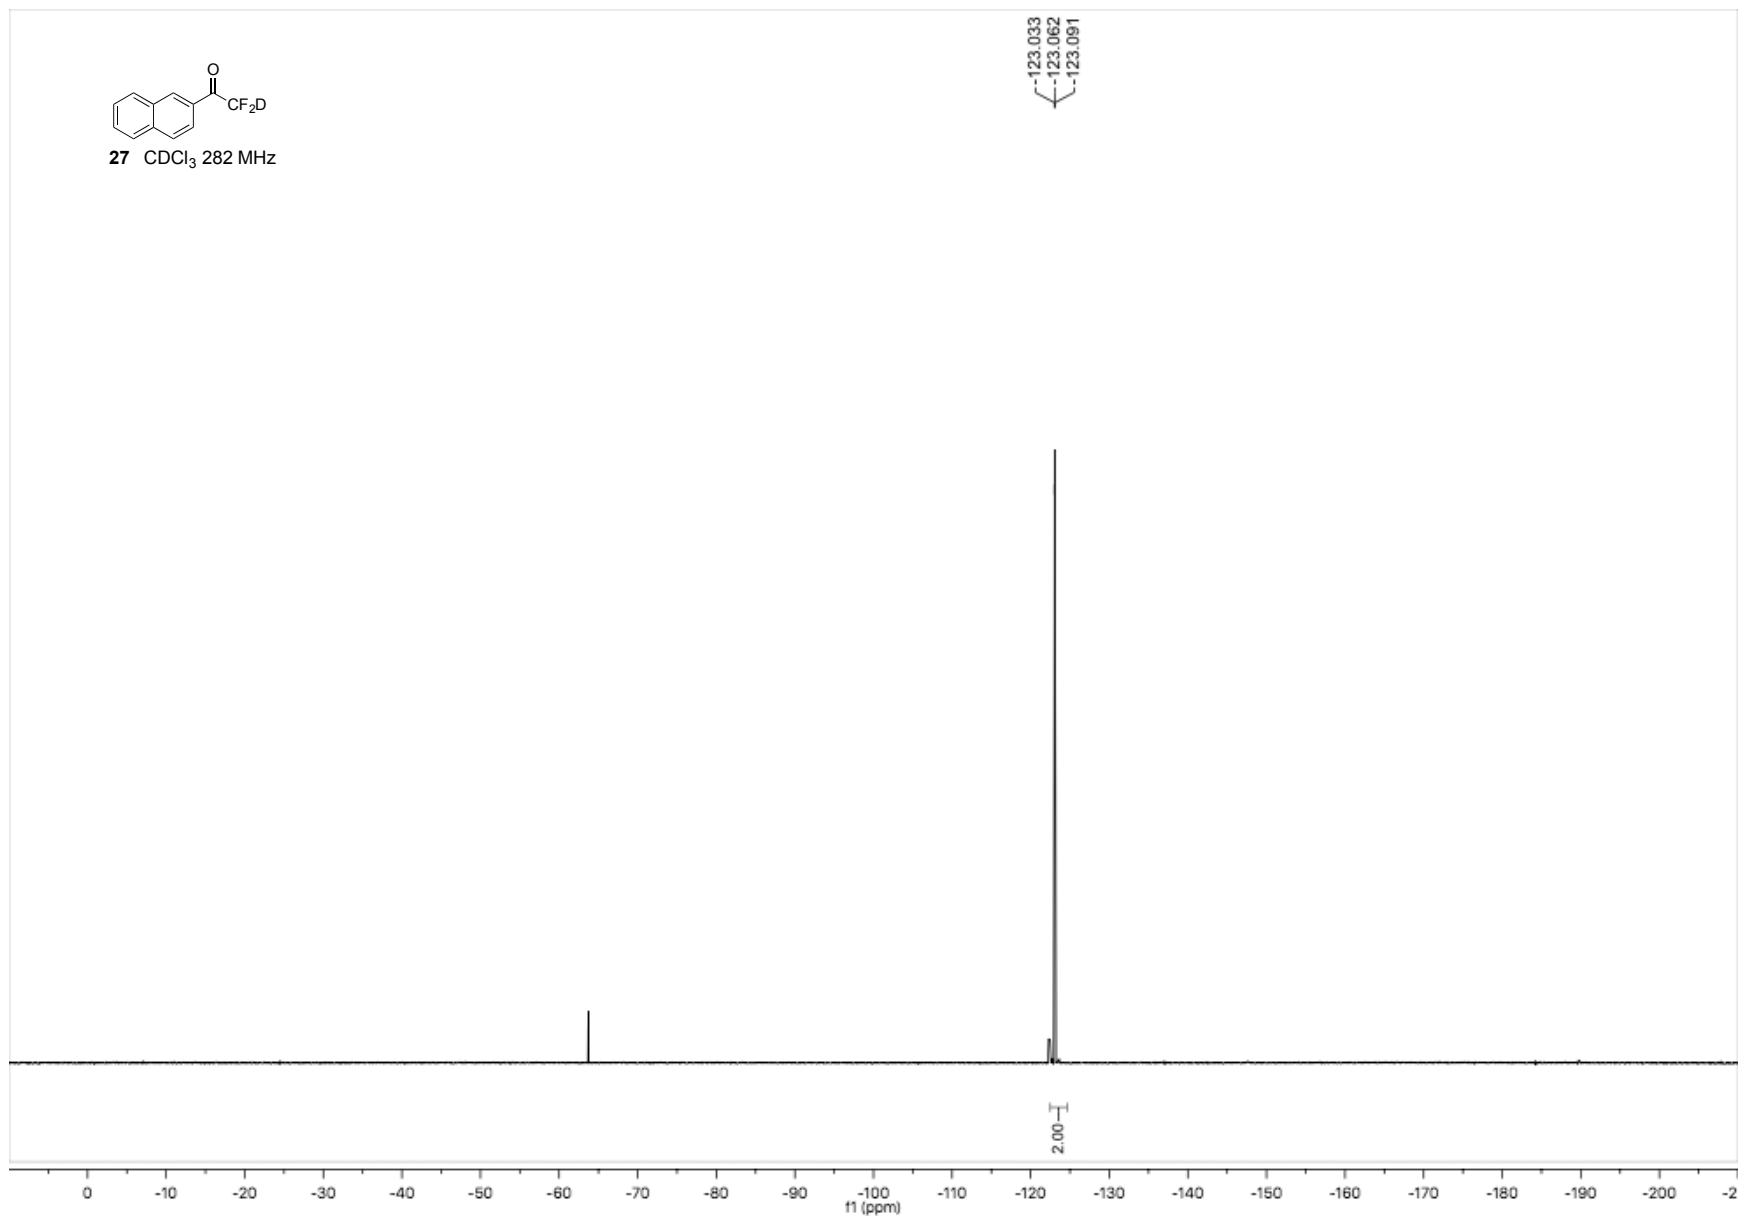

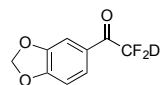

**28** CDCl<sub>3</sub> 500 MHz

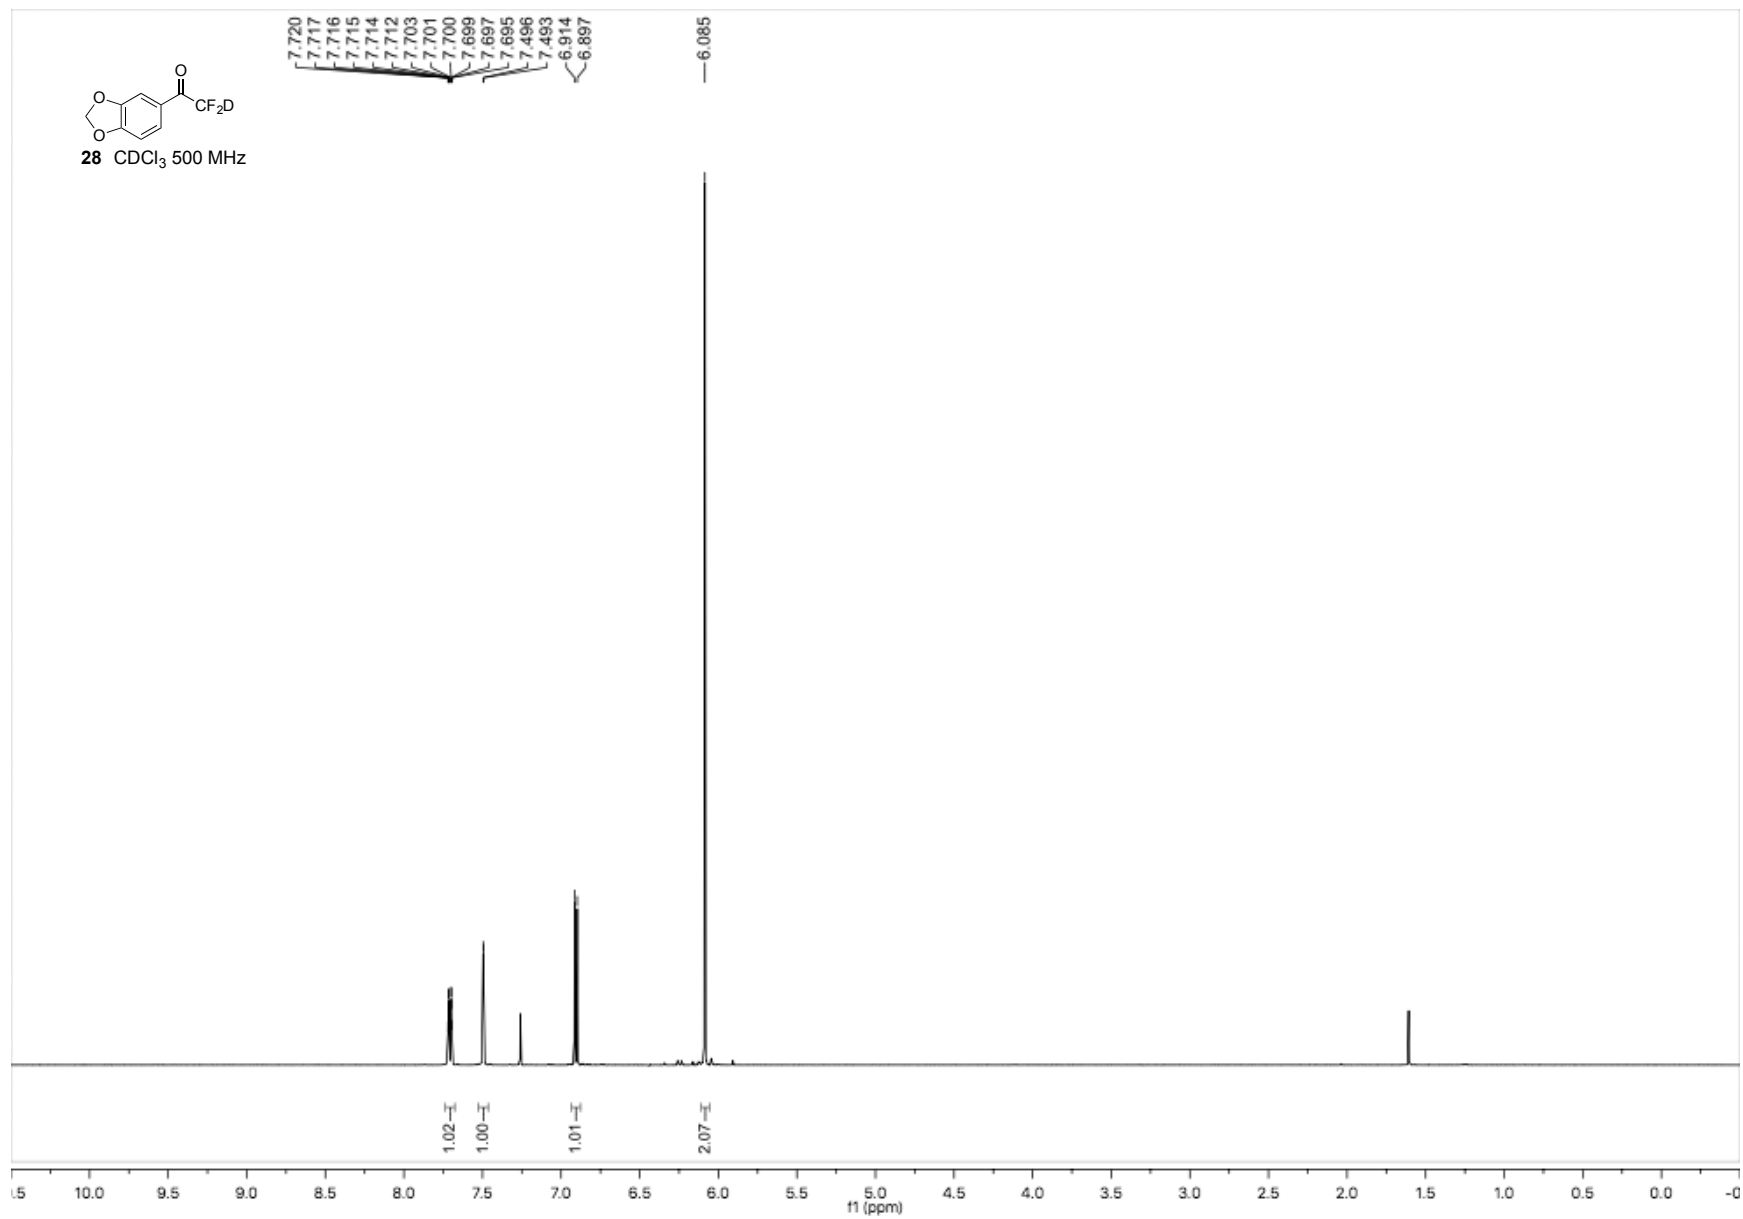

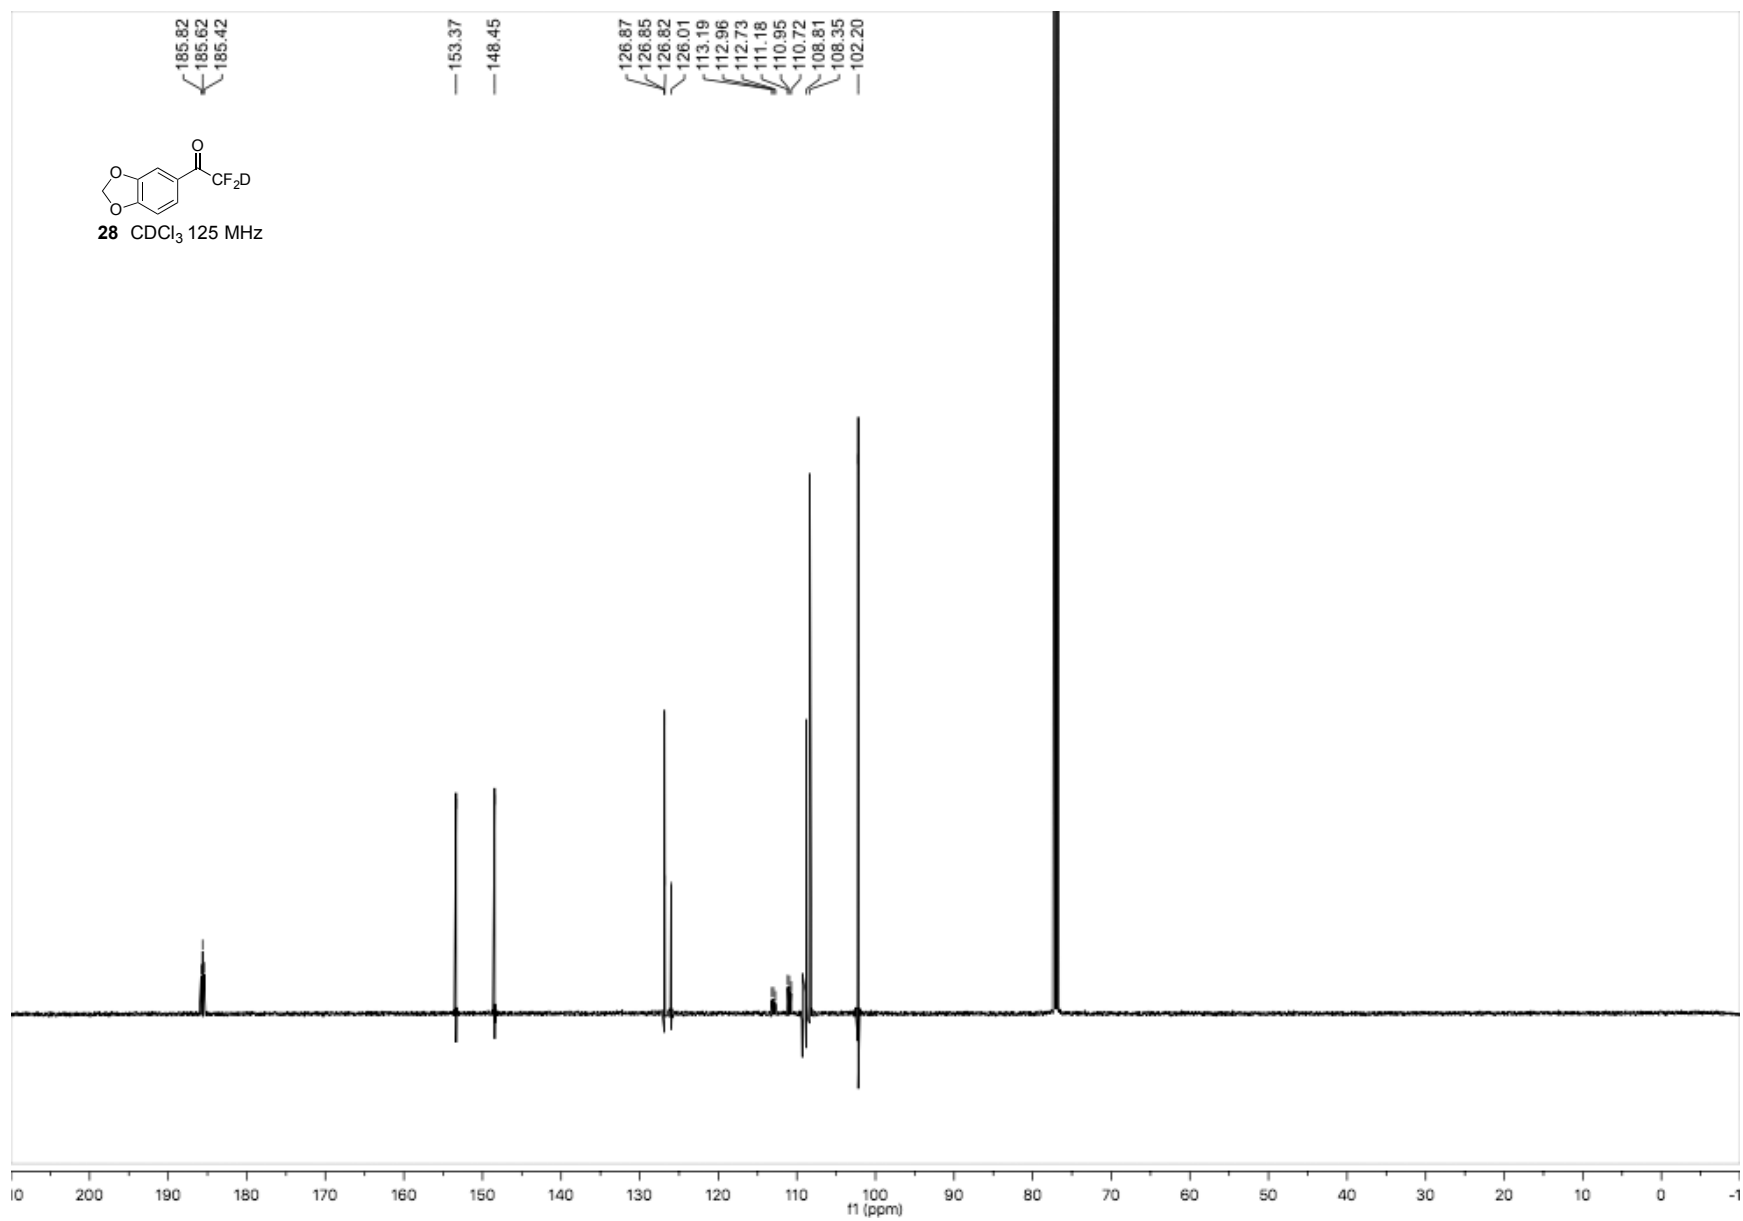

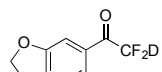

28 CDCl<sub>3</sub> 282 MHz

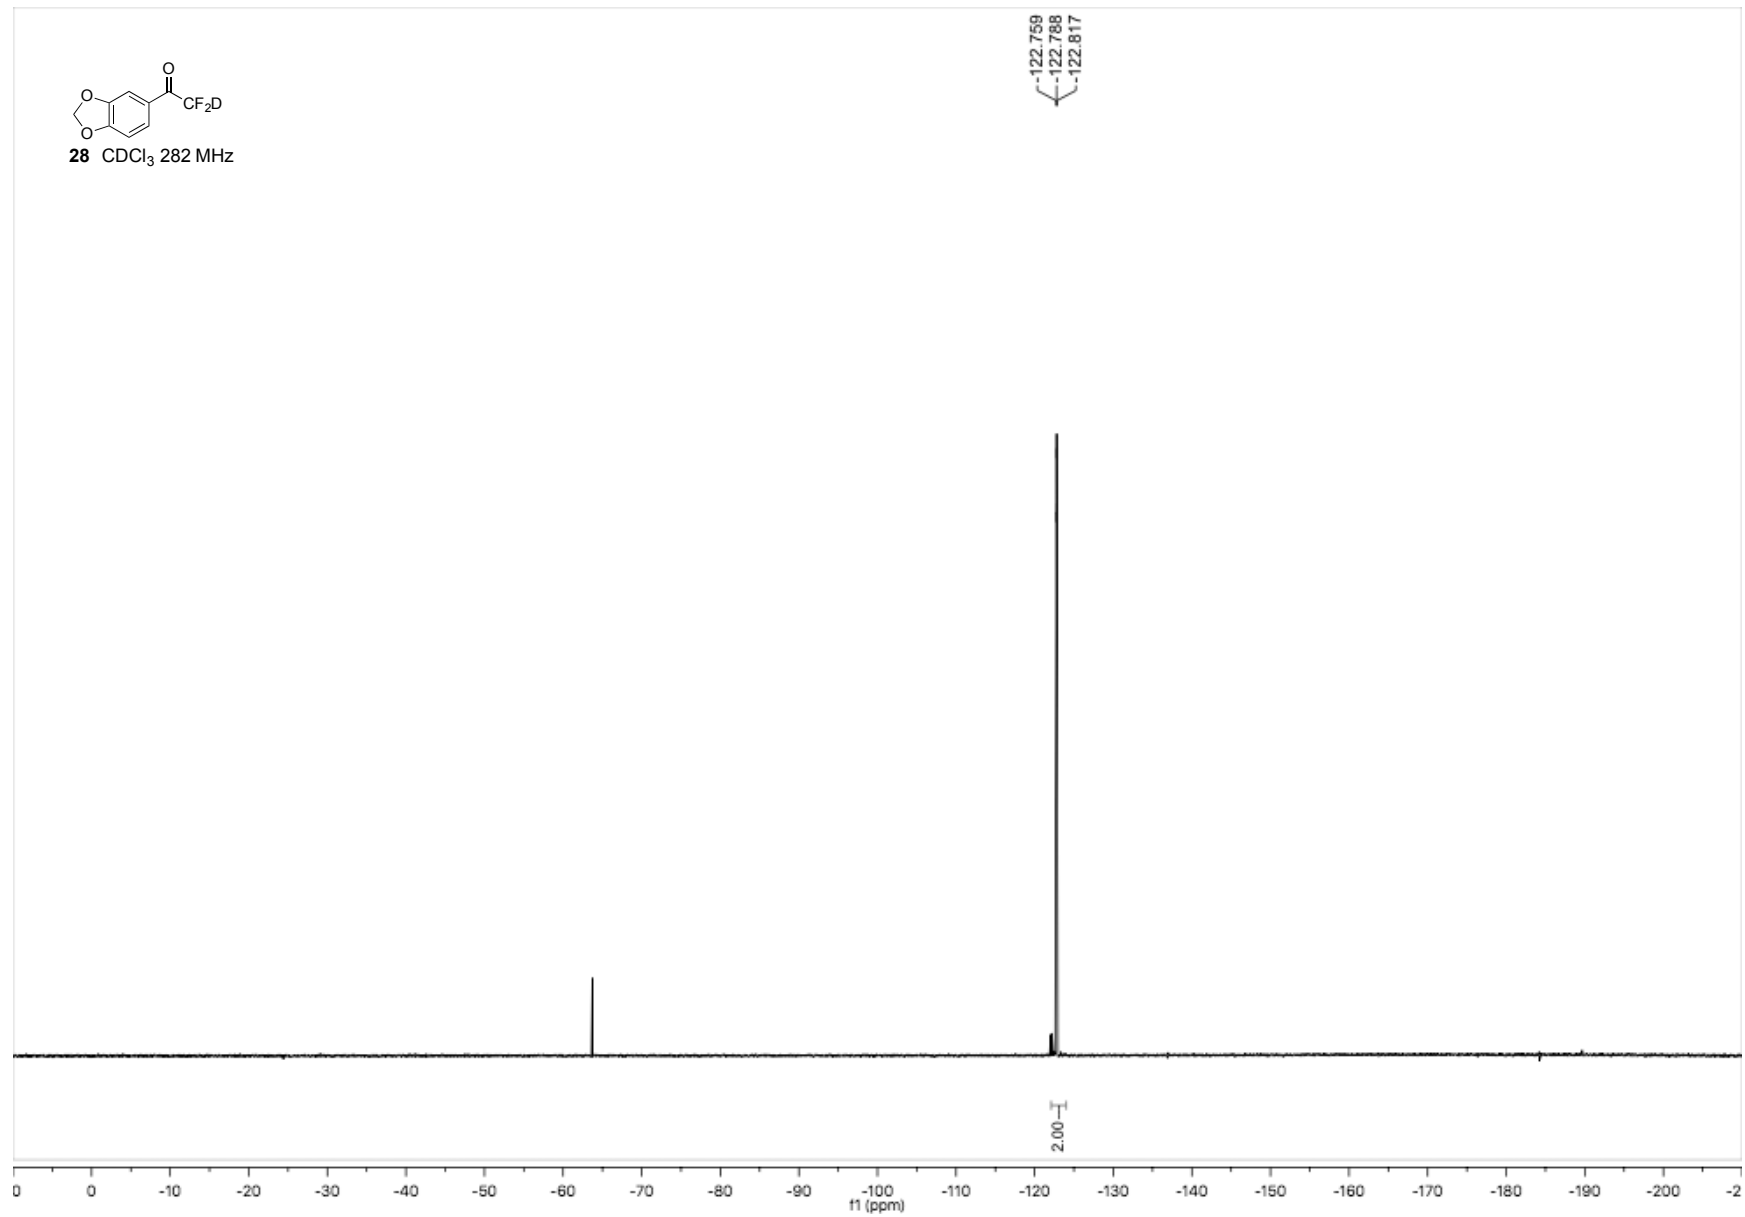

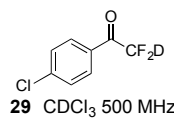

8.034  
8.017

7.519  
7.501

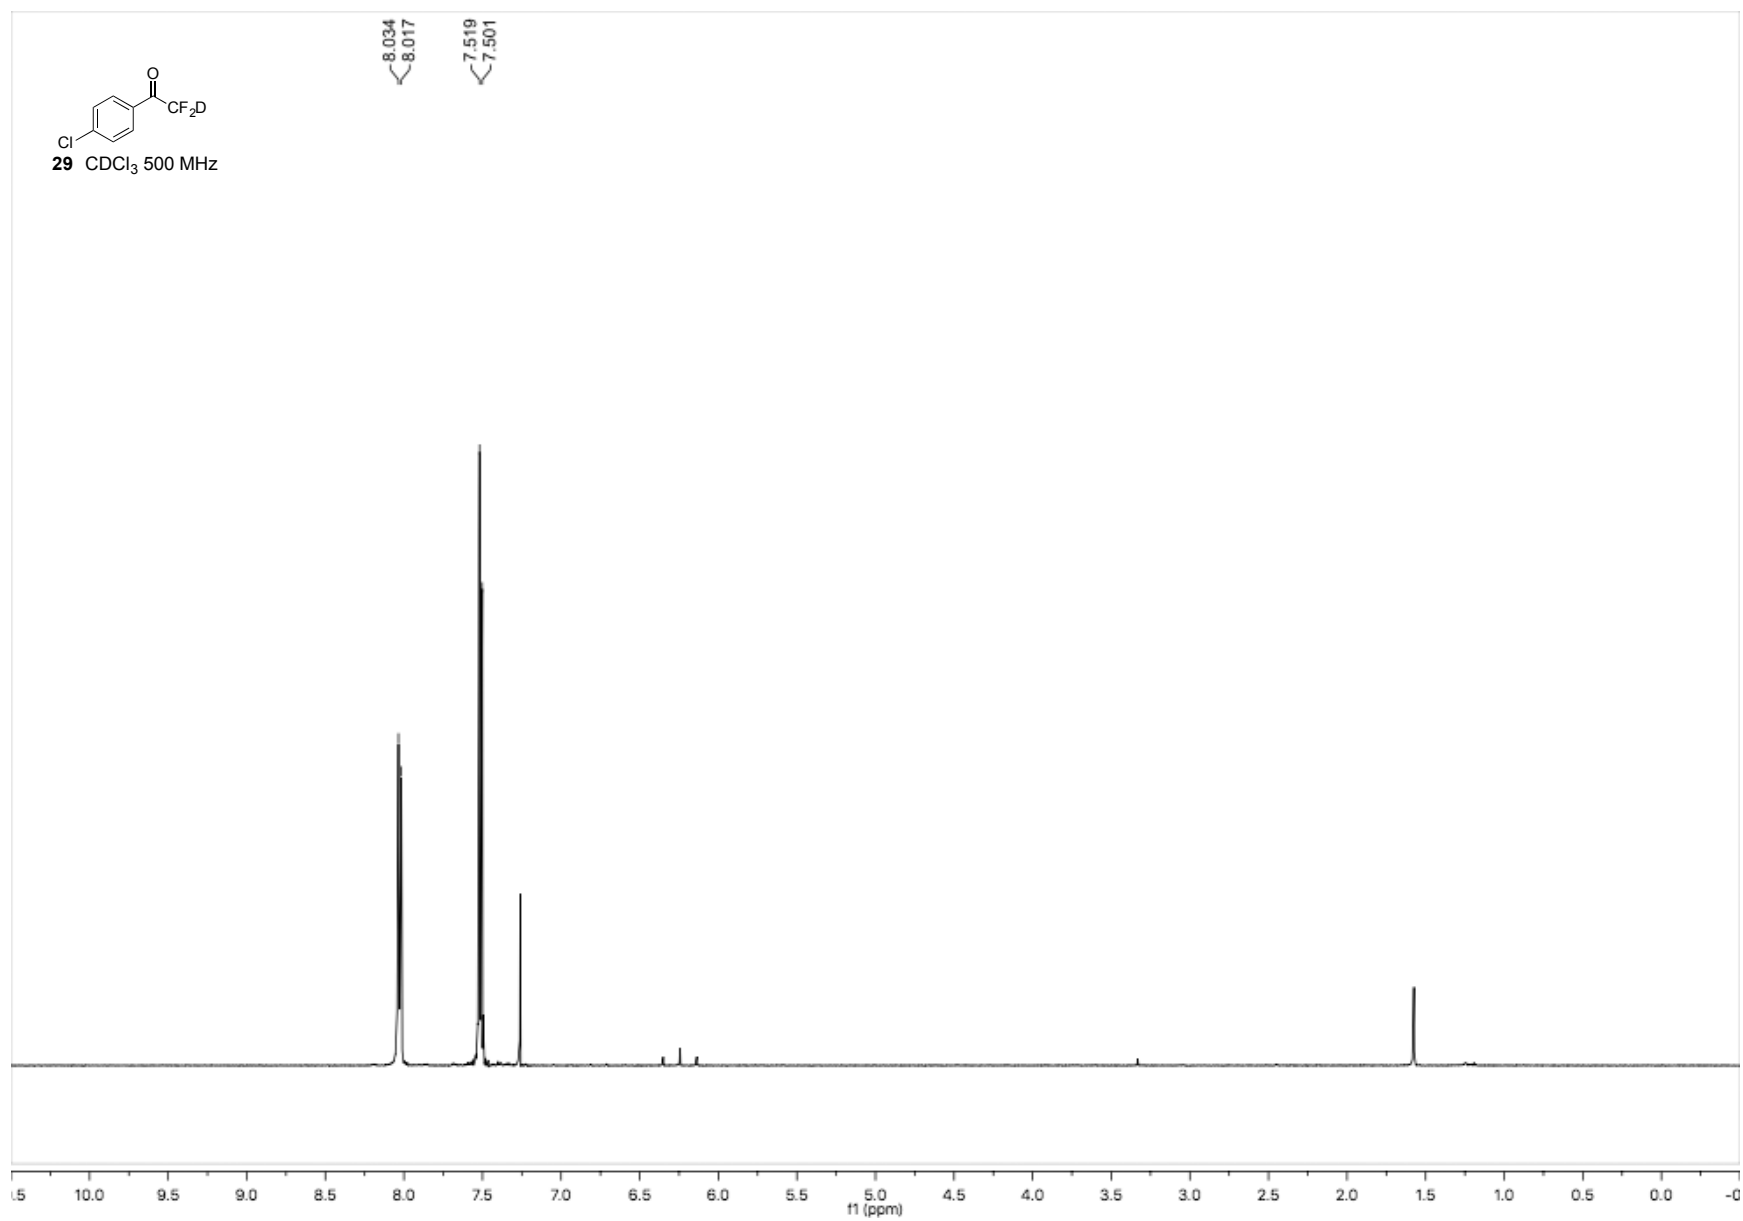



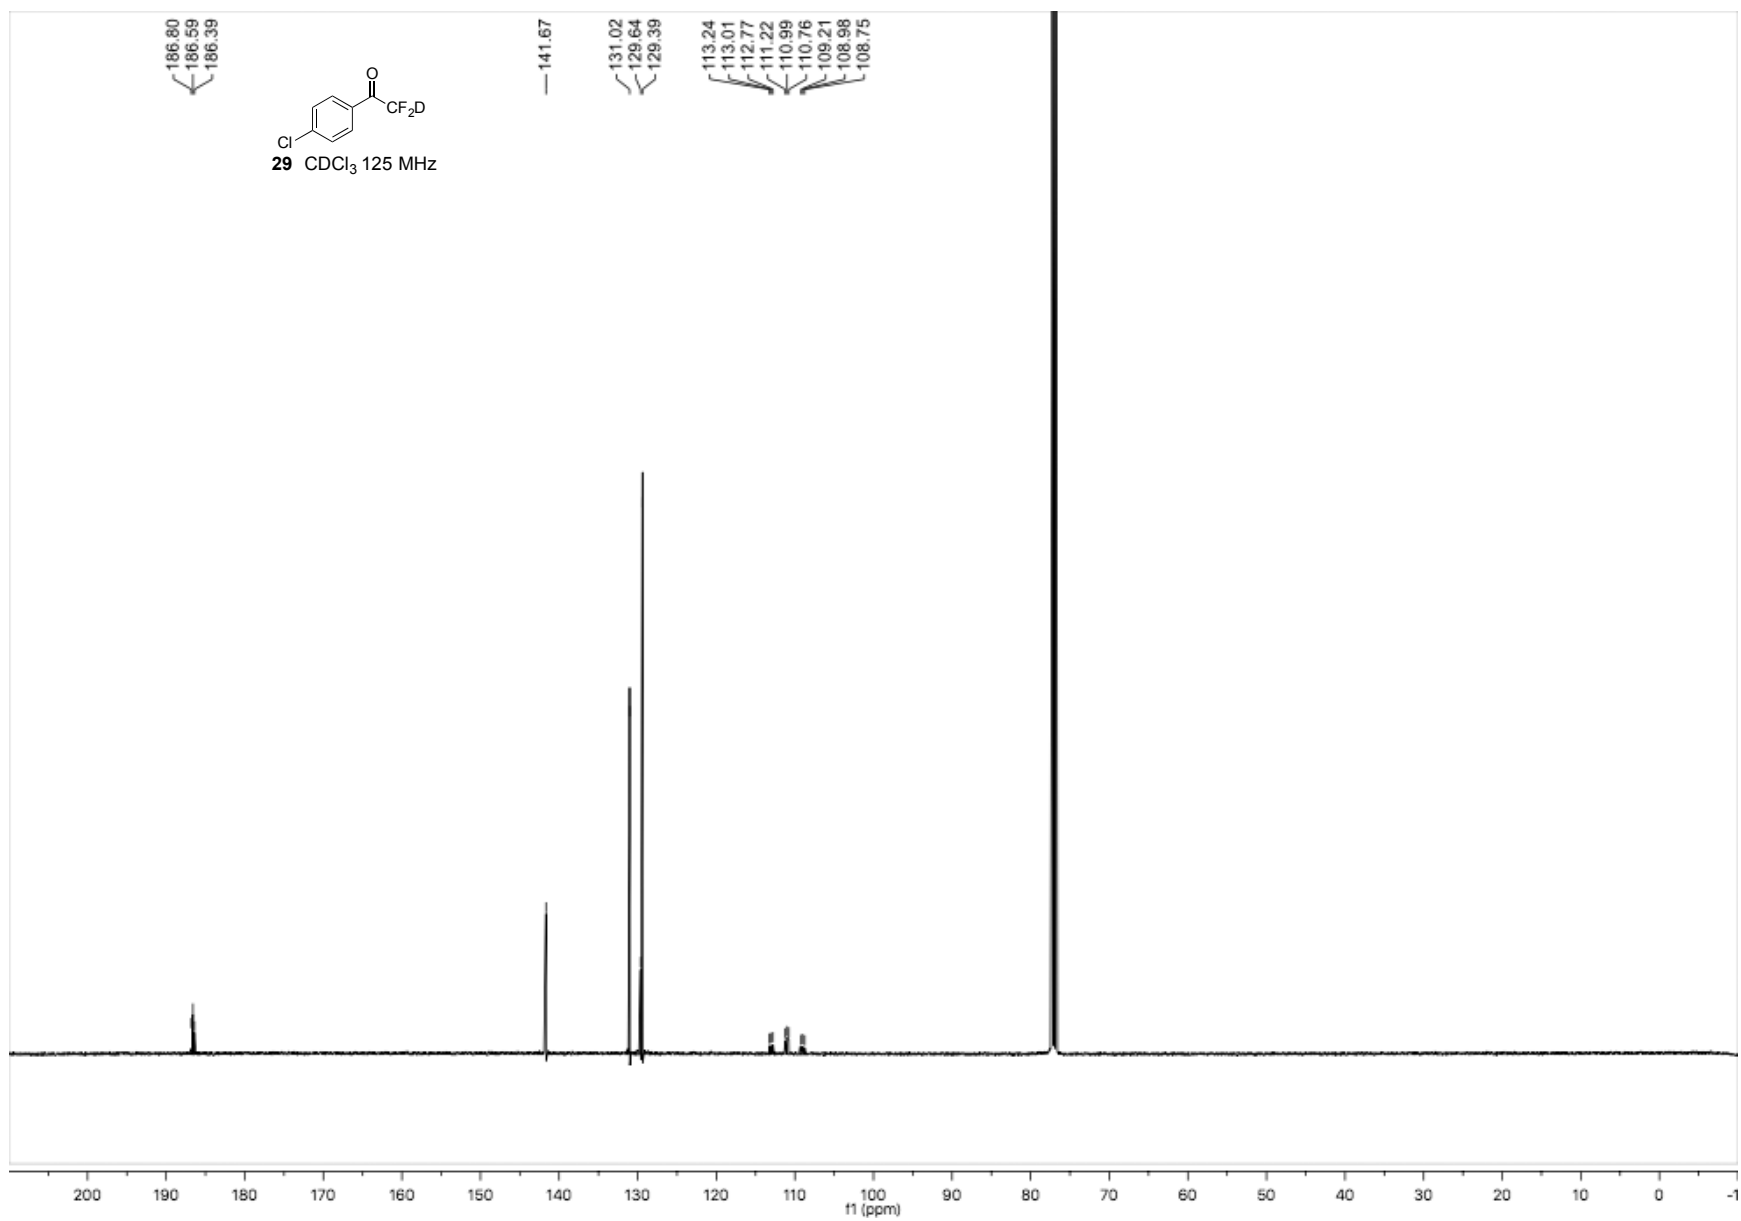

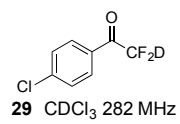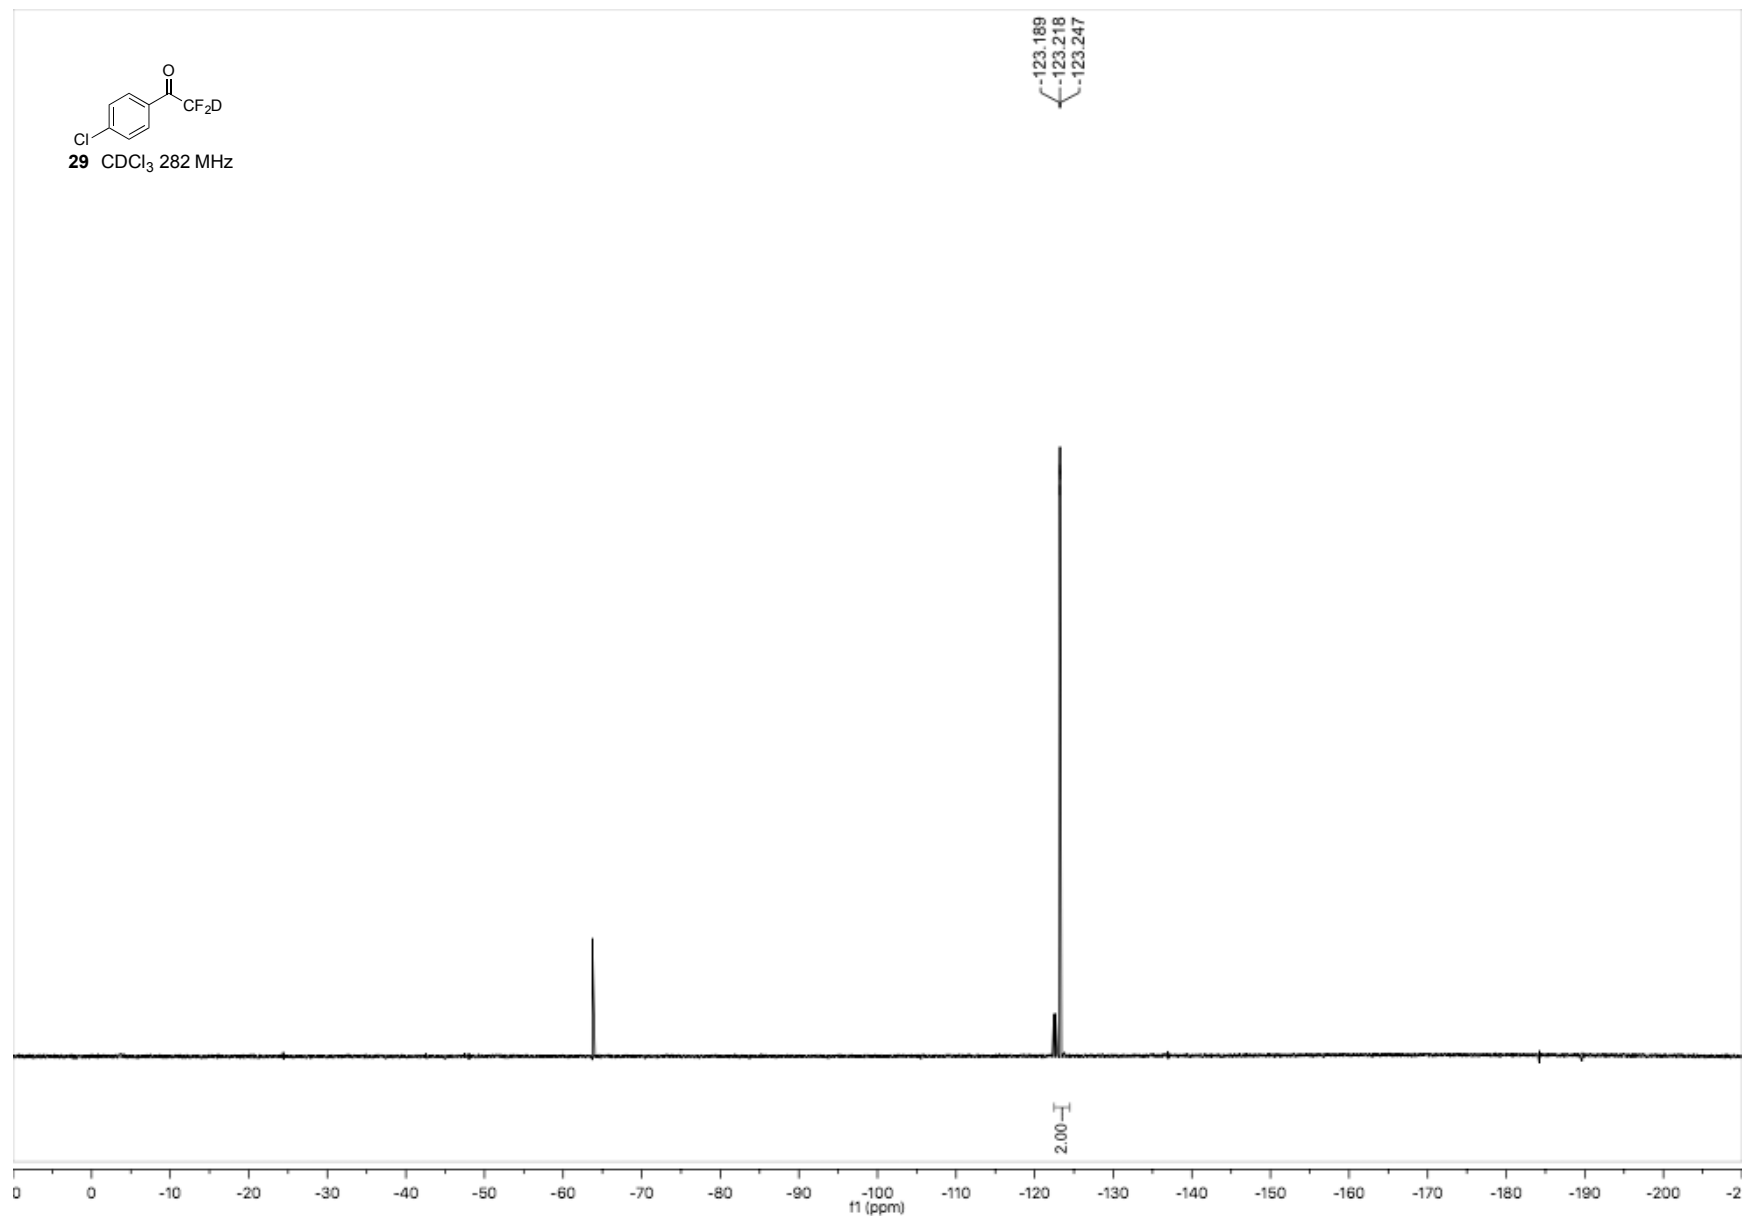

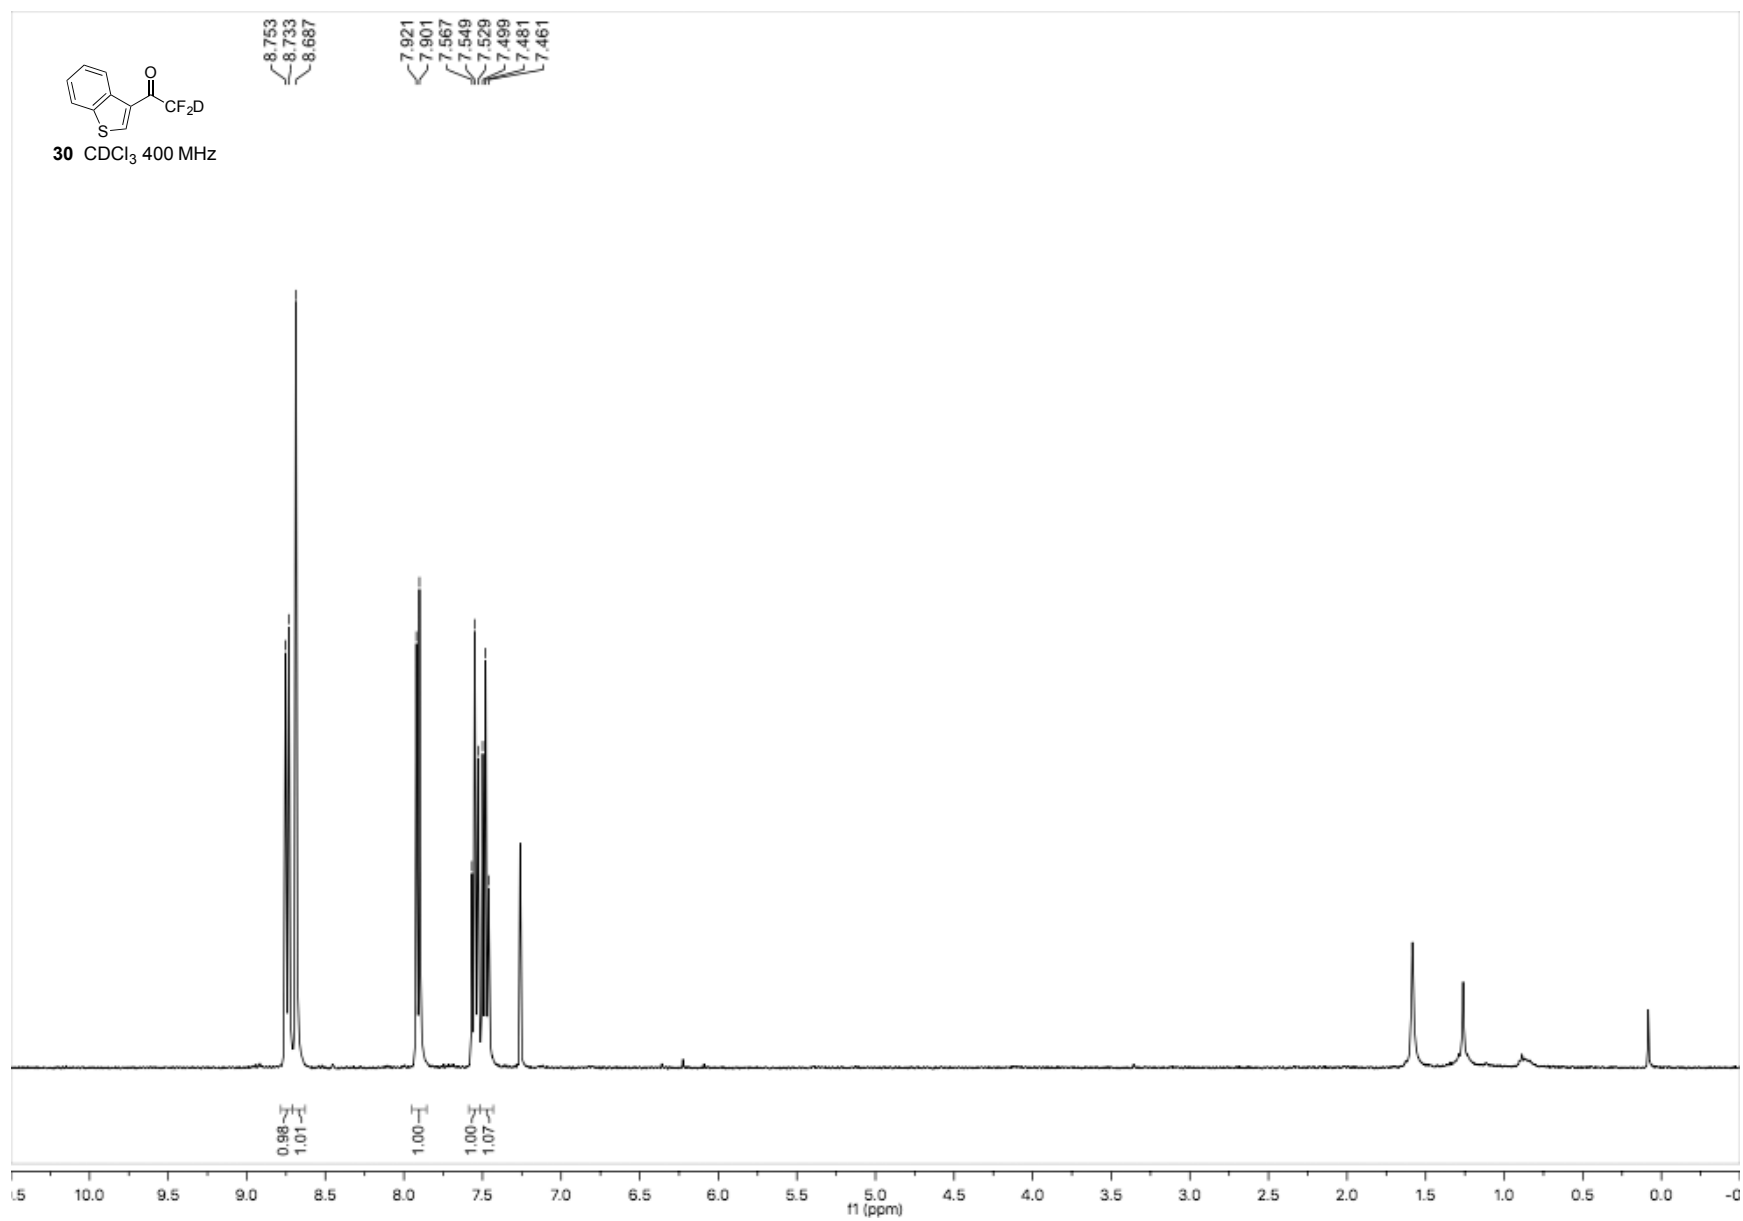

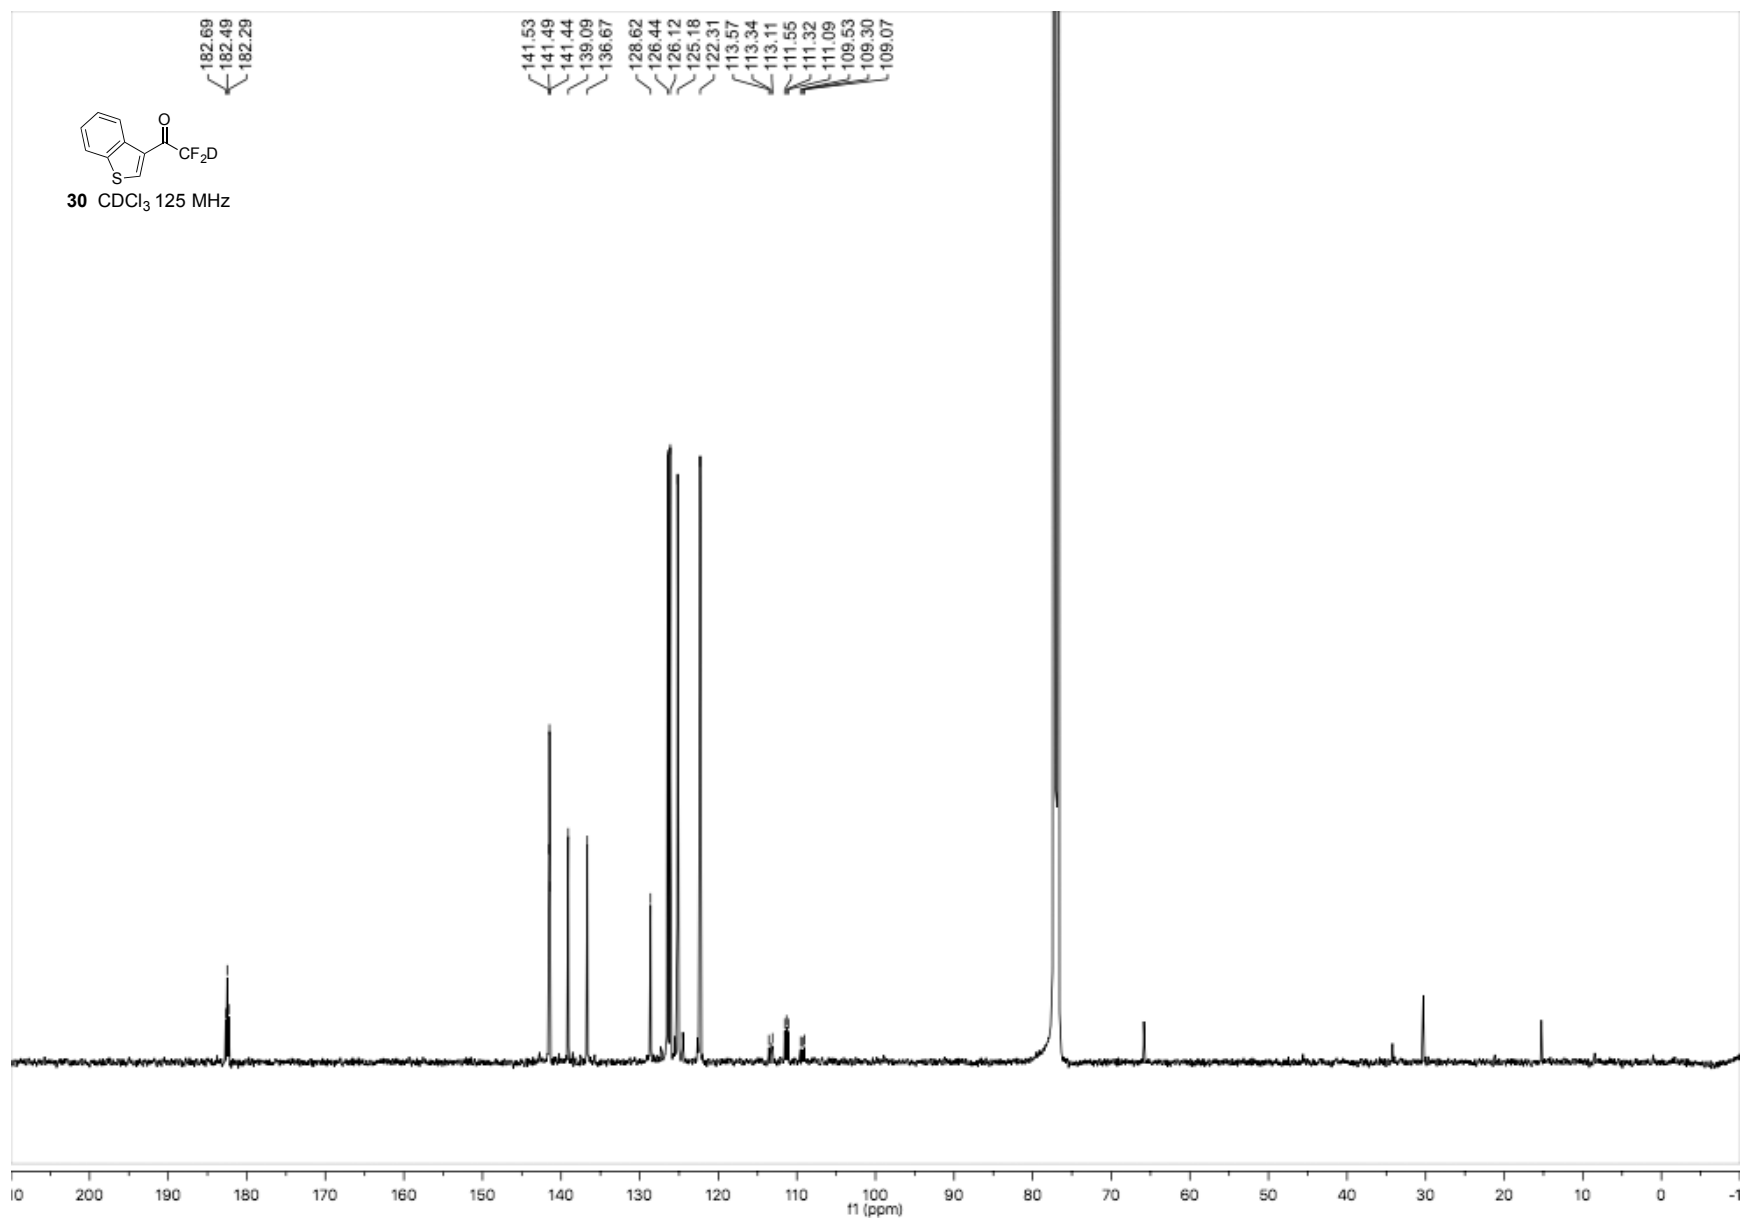

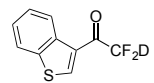

30 CDCl<sub>3</sub> 376 MHz

-121.700  
-121.722  
-121.744

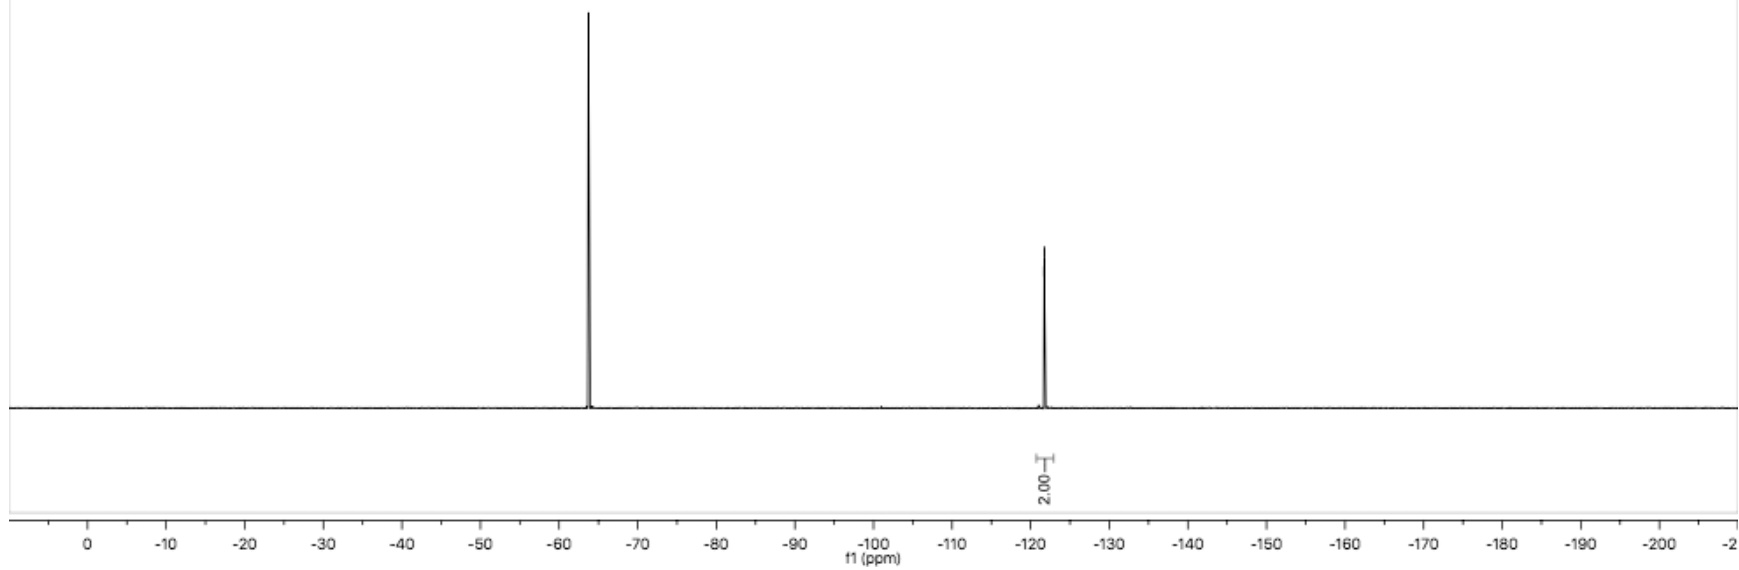

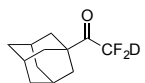

31 CDCl<sub>3</sub> 500 MHz

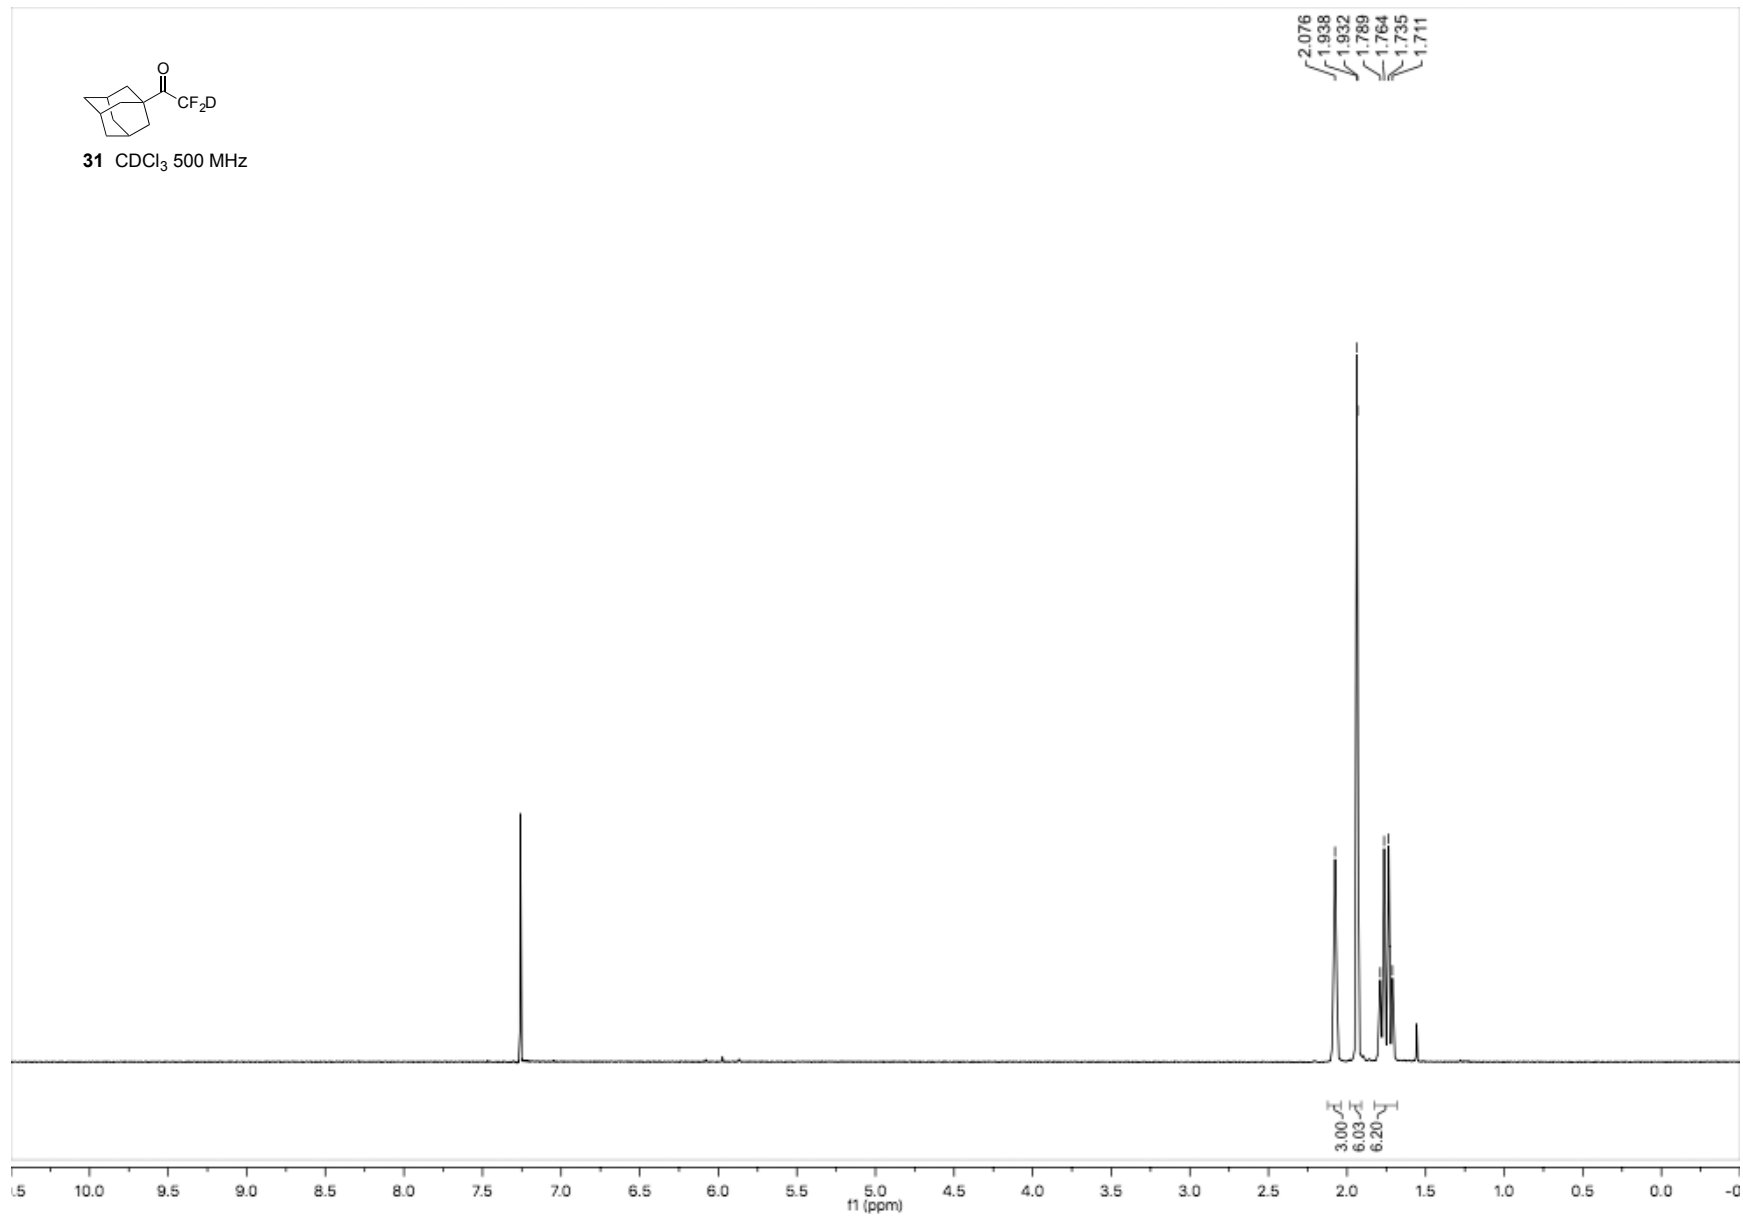

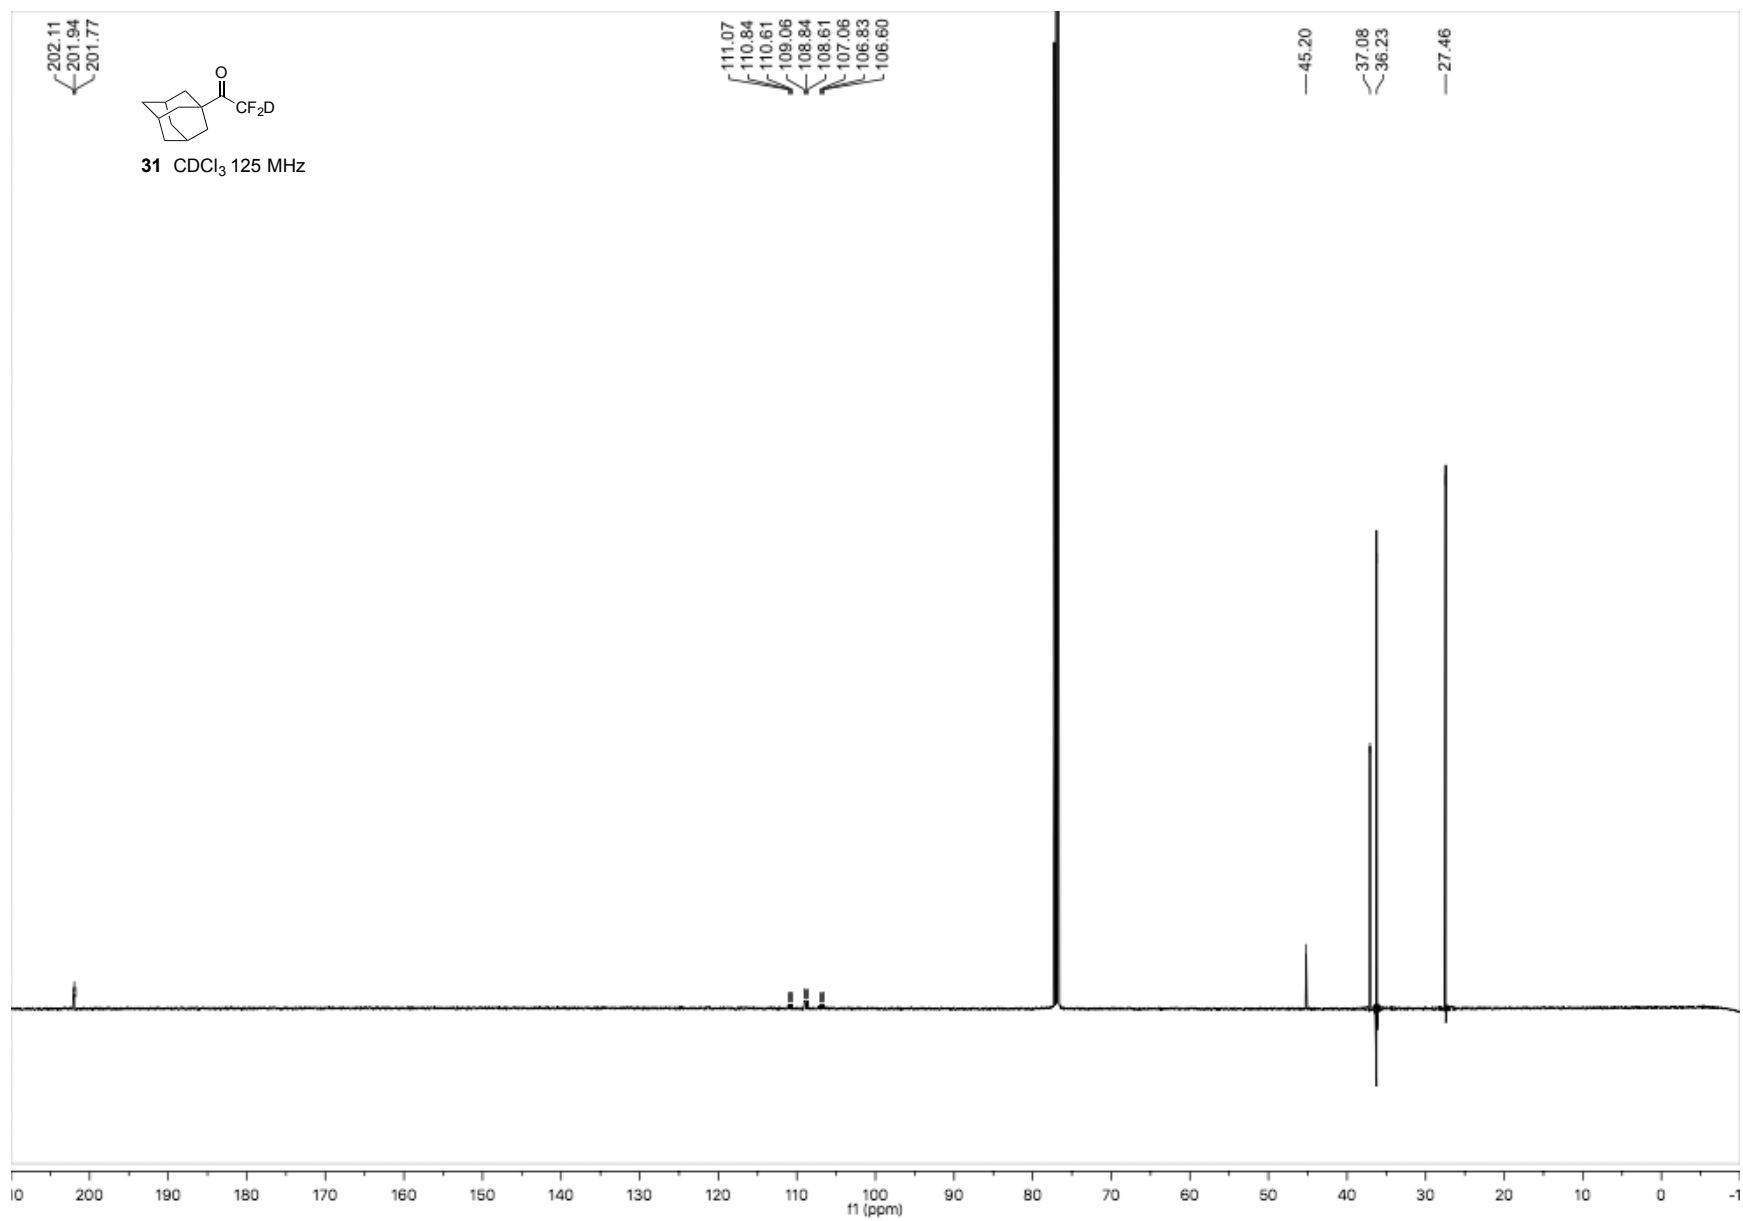

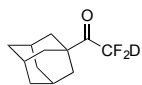

31 CDCl<sub>3</sub> 282 MHz

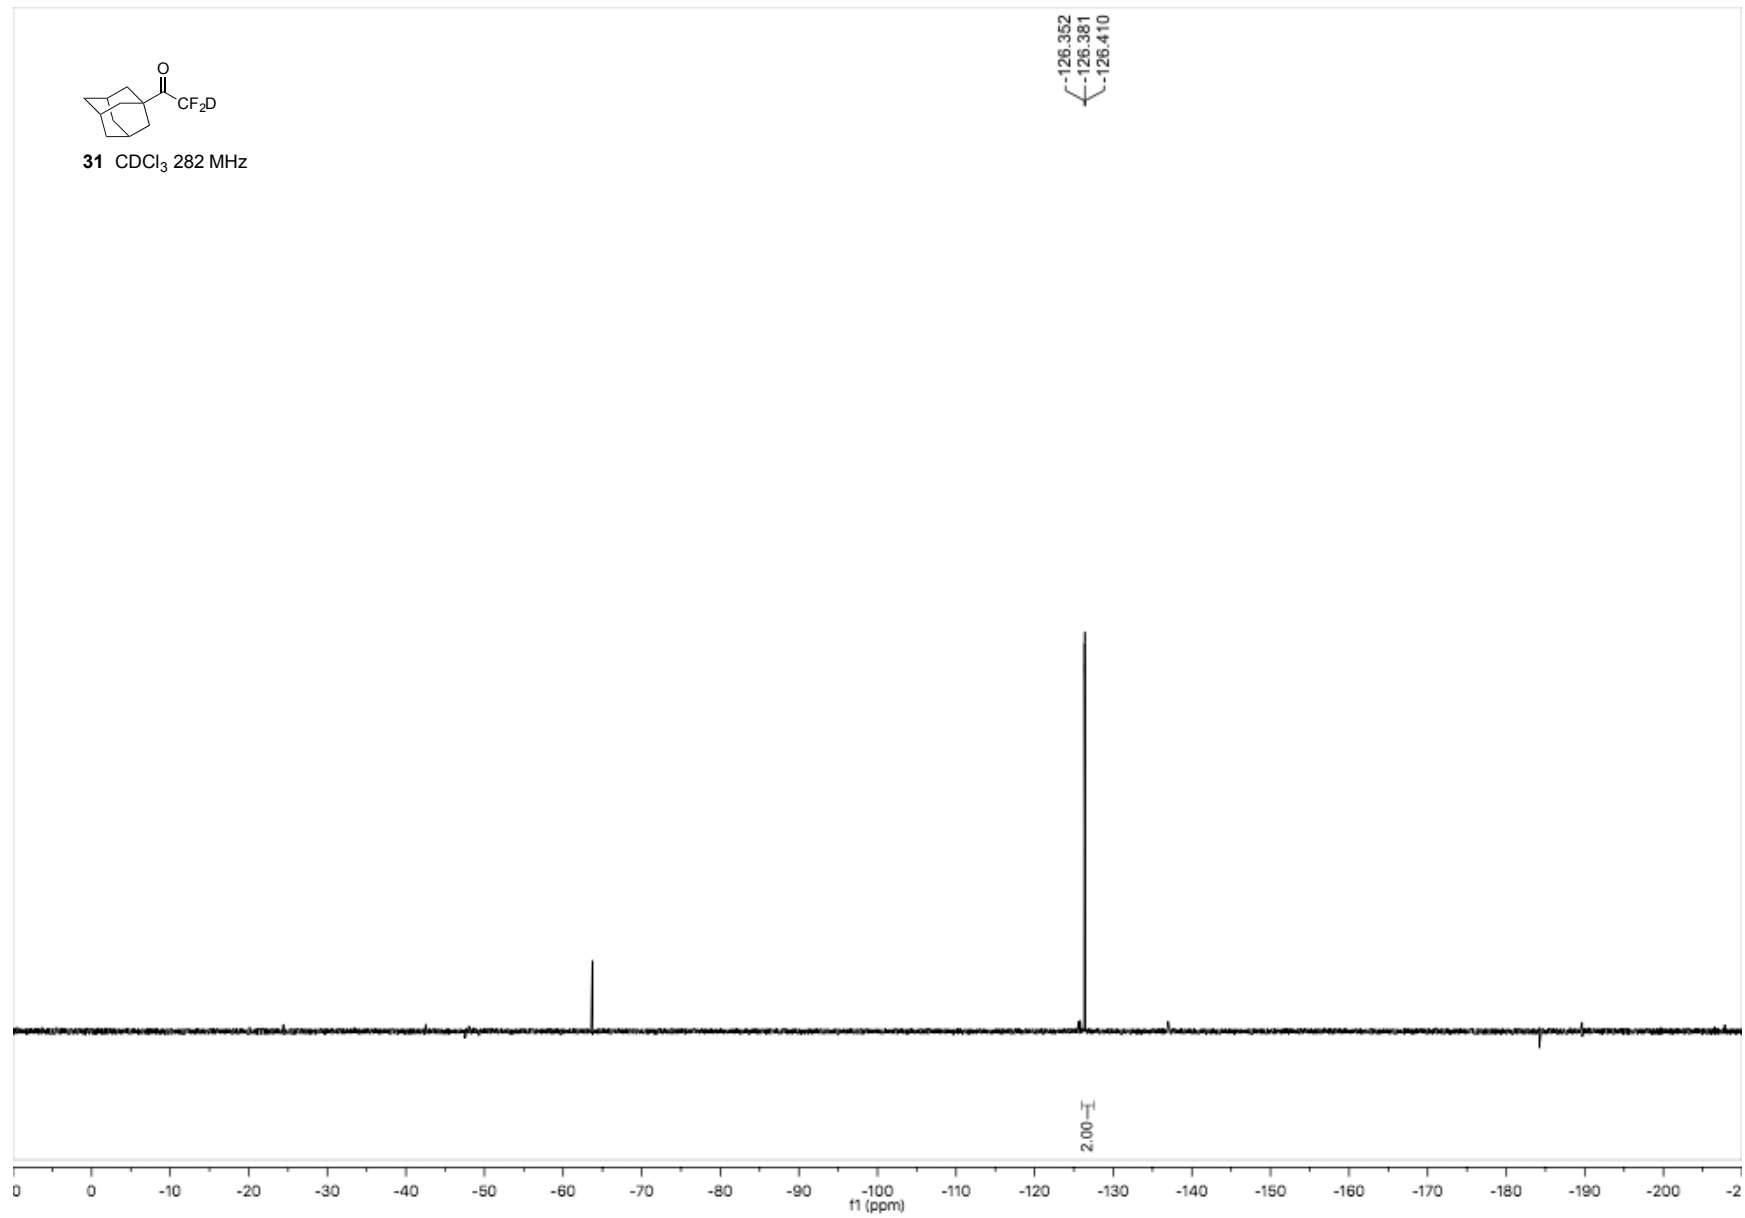



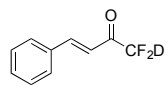

32 CDCl<sub>3</sub> 500 MHz

7.920  
7.888  
7.641  
7.627  
7.461  
7.437  
7.076  
7.074  
7.071  
7.044  
7.041  
7.039

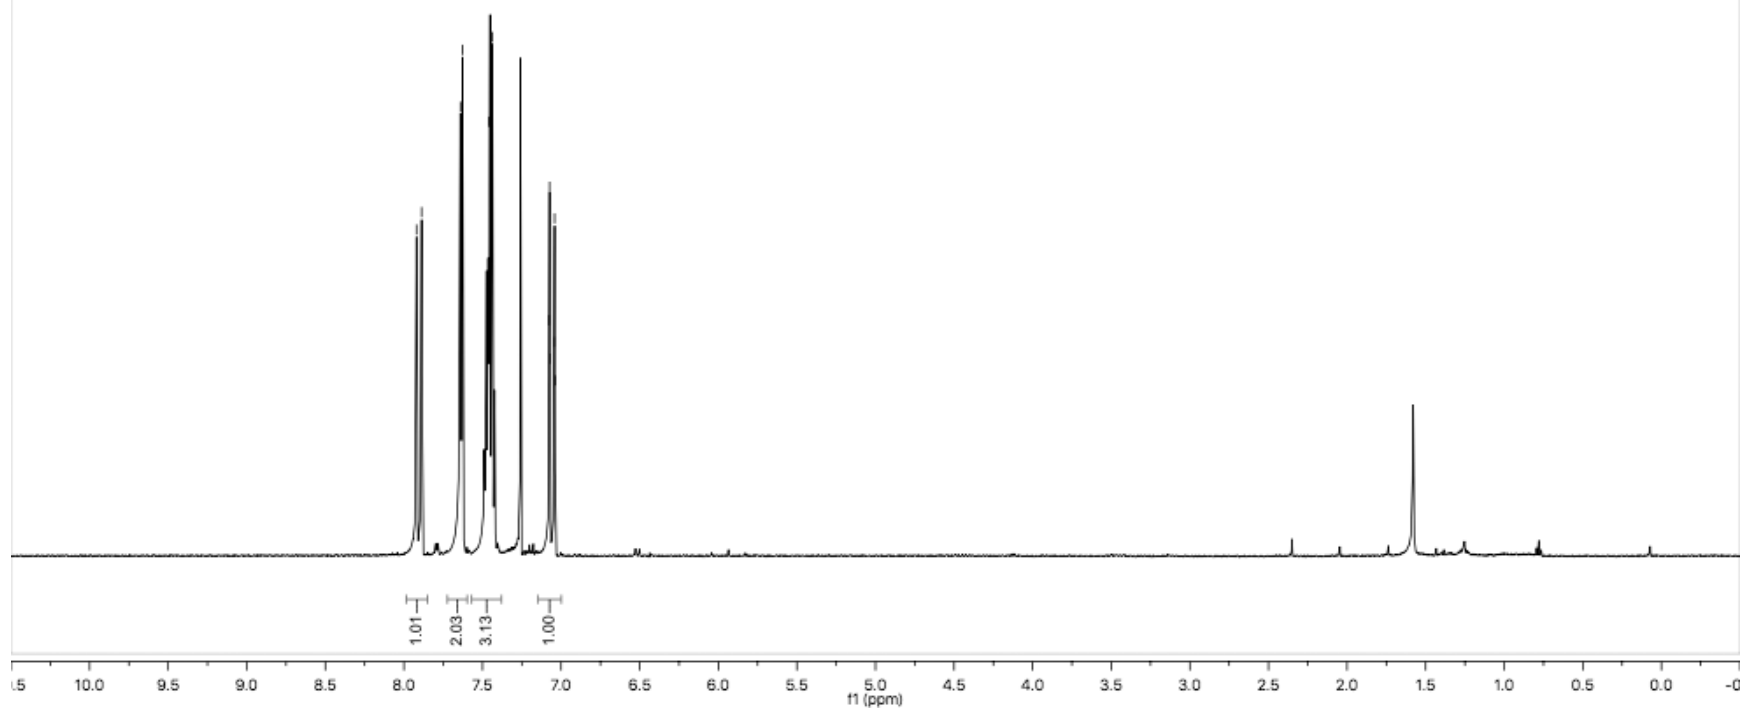

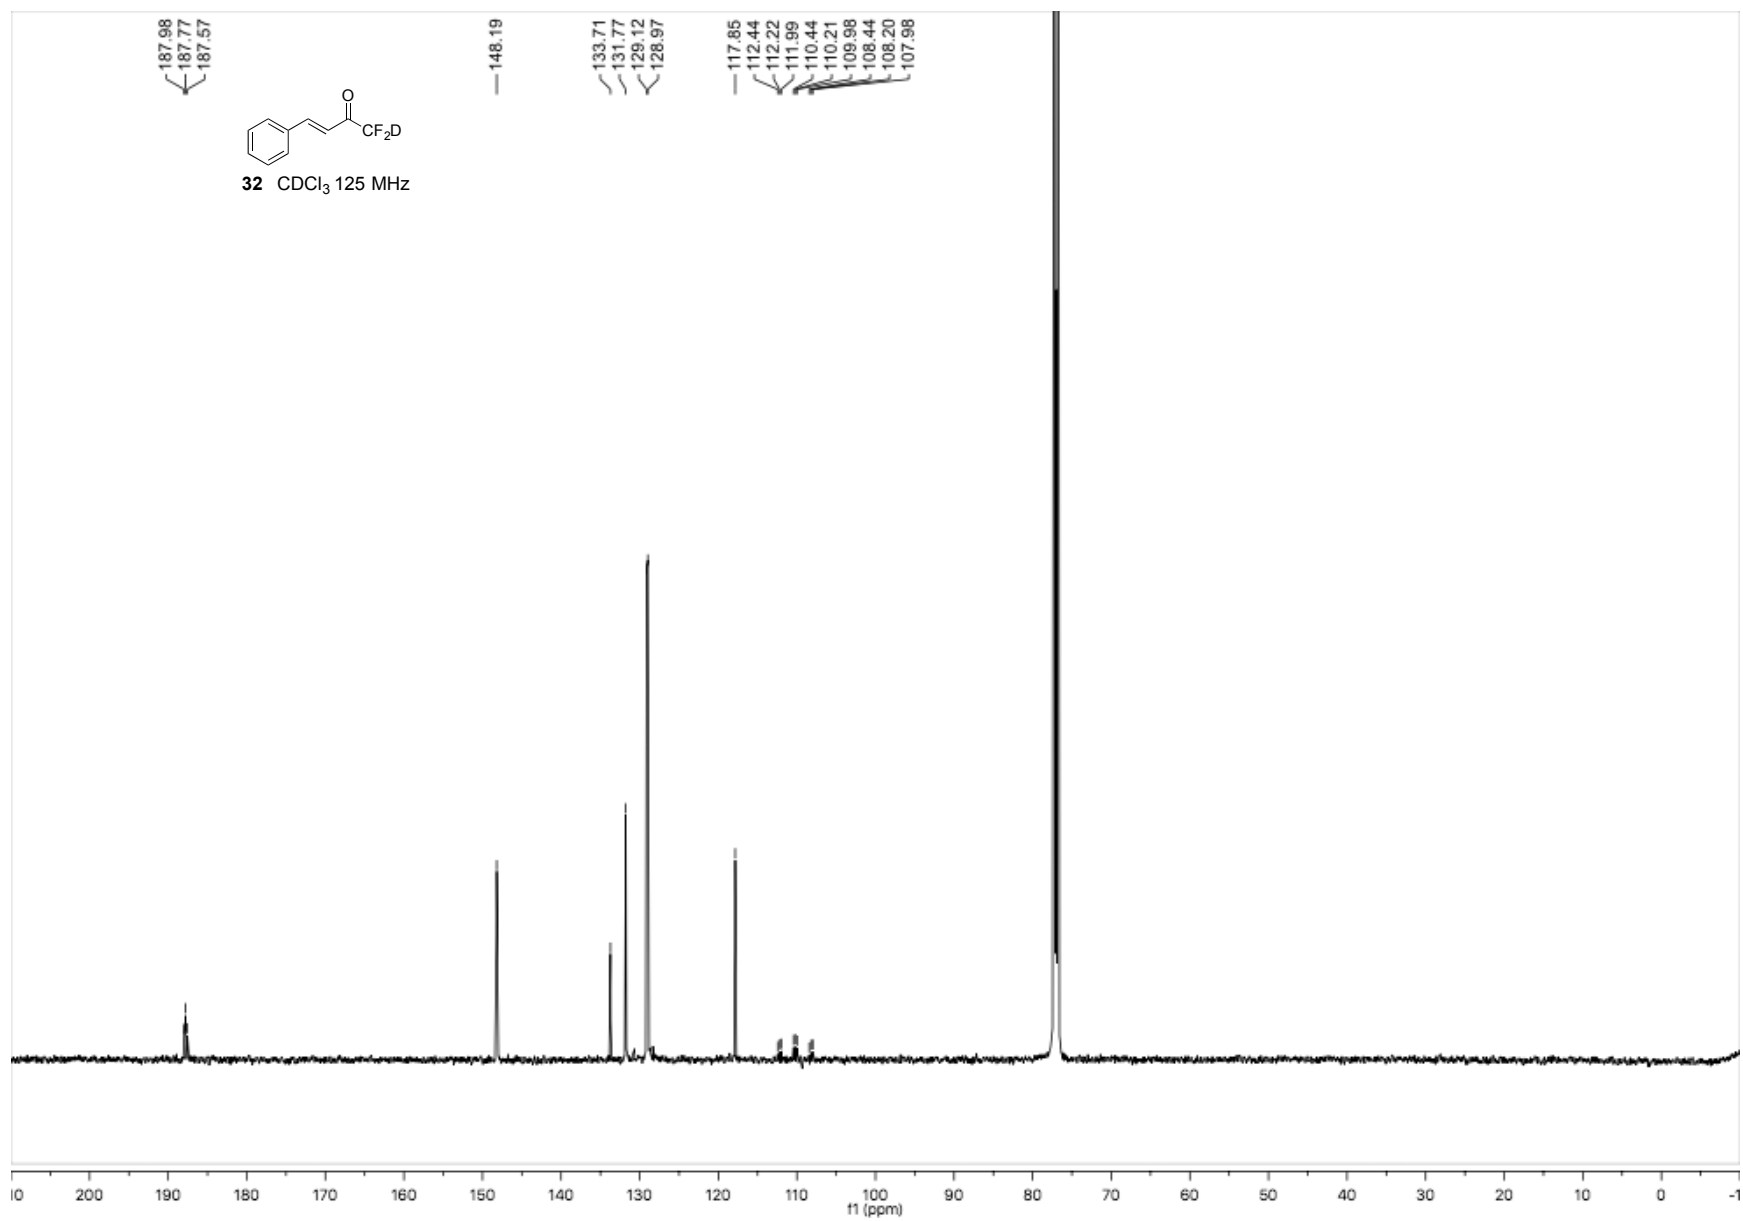

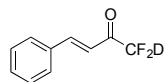

32 CDCl<sub>3</sub> 282 MHz

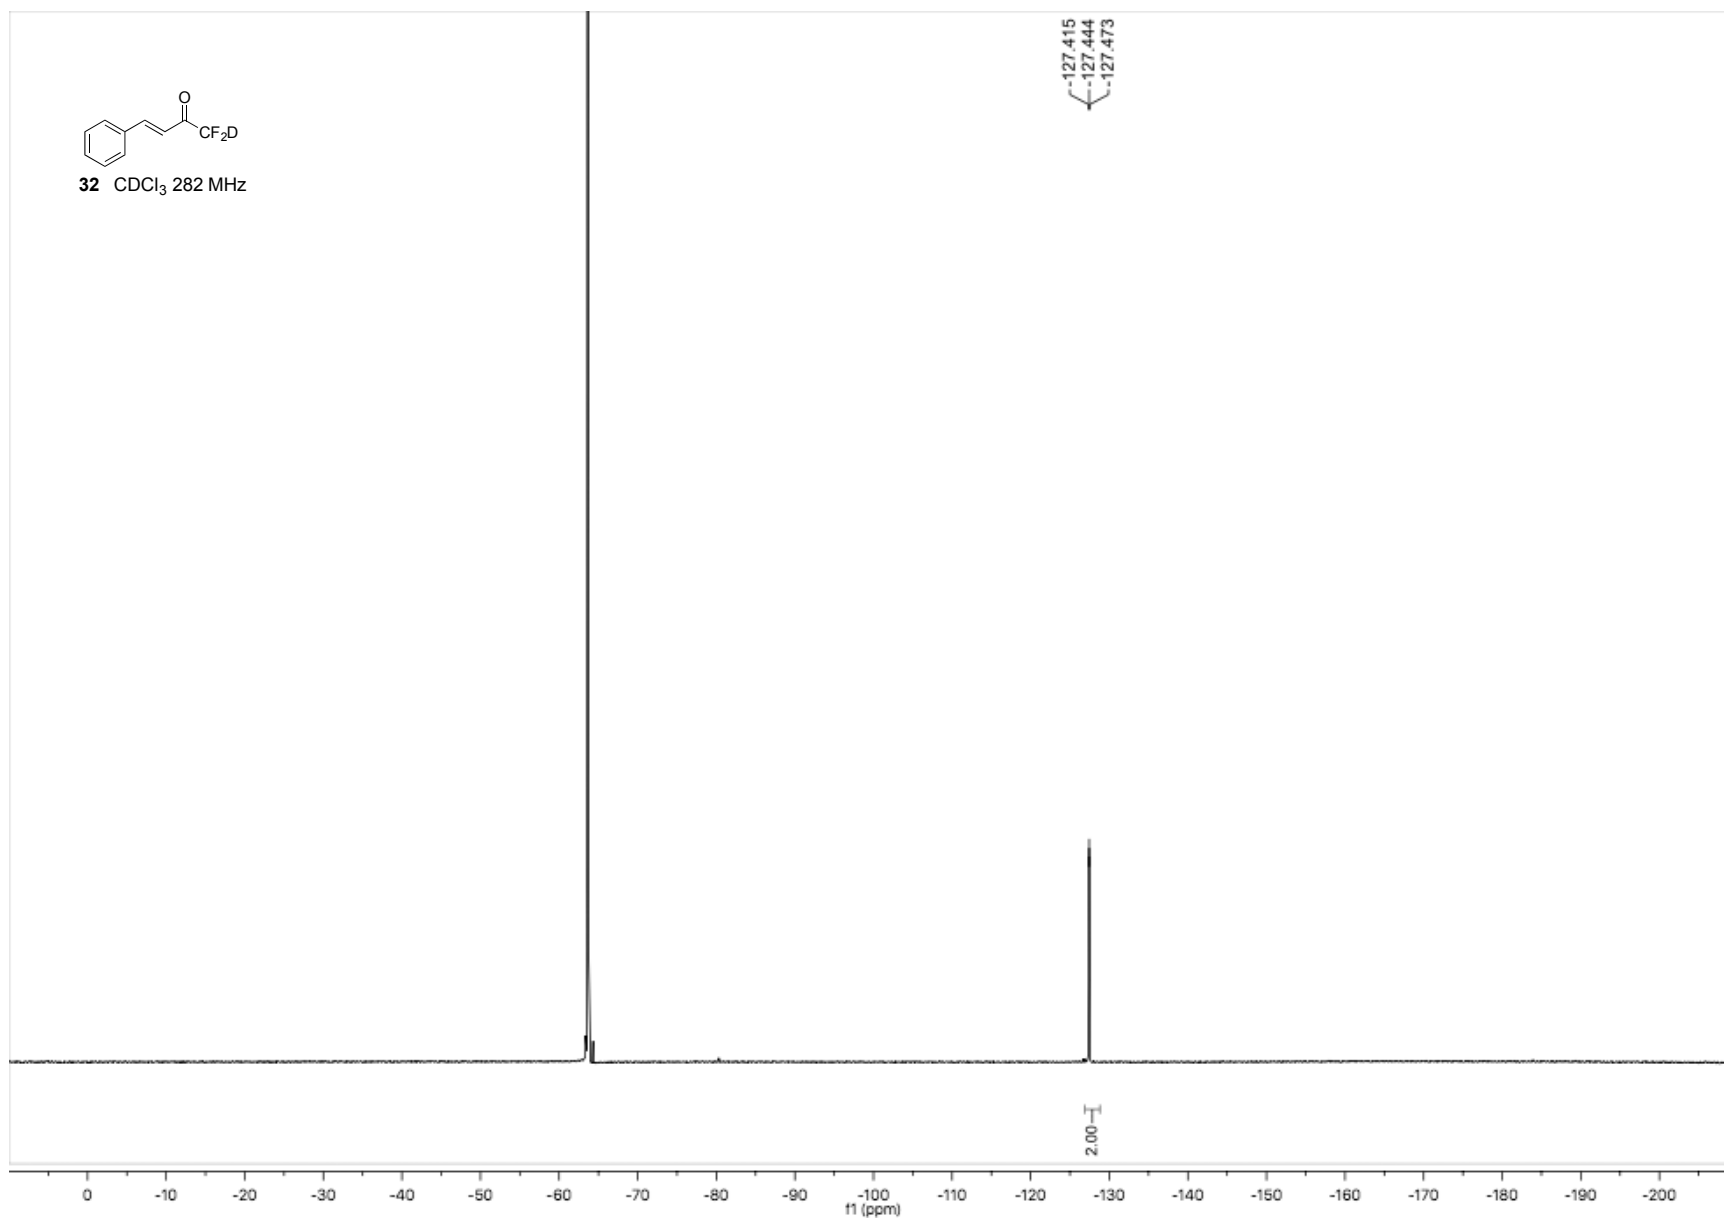

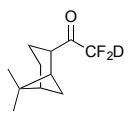

33 CDCl<sub>3</sub> 500 MHz

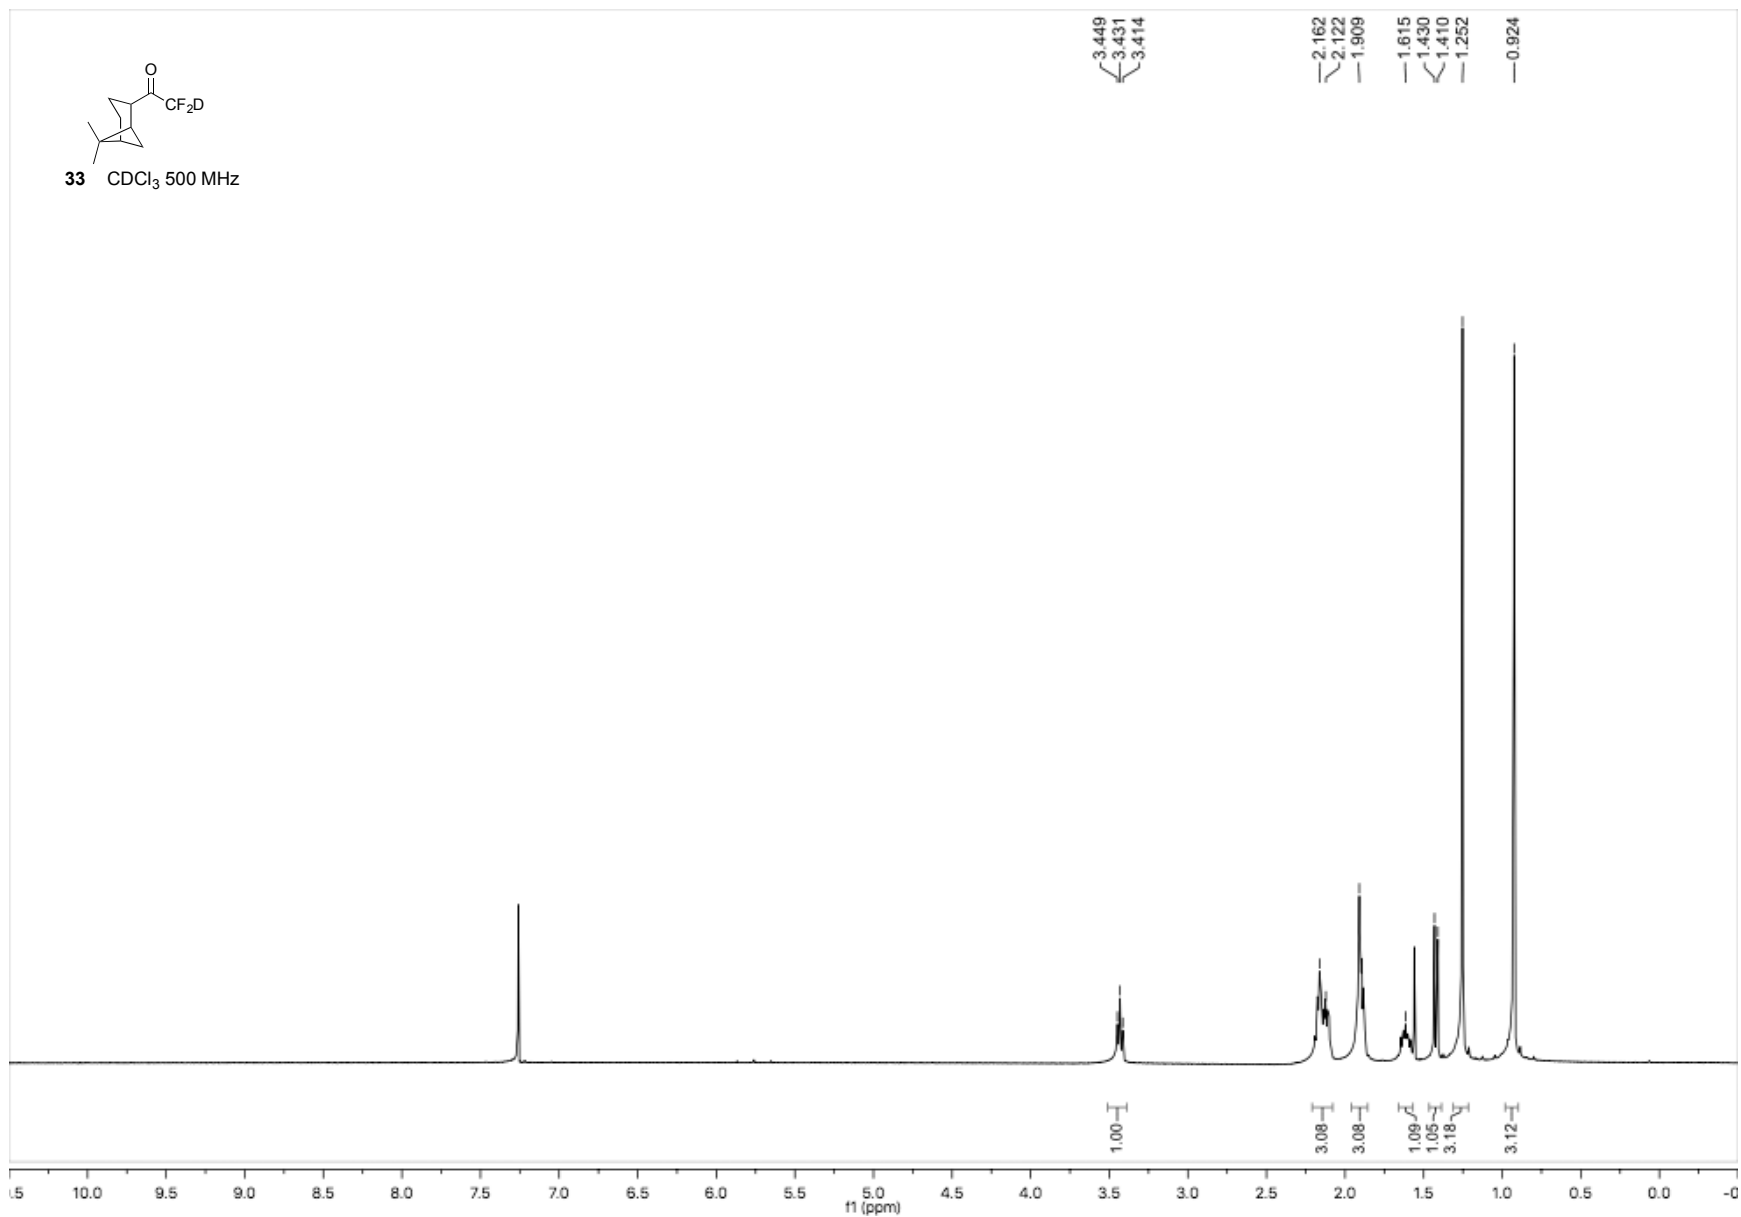

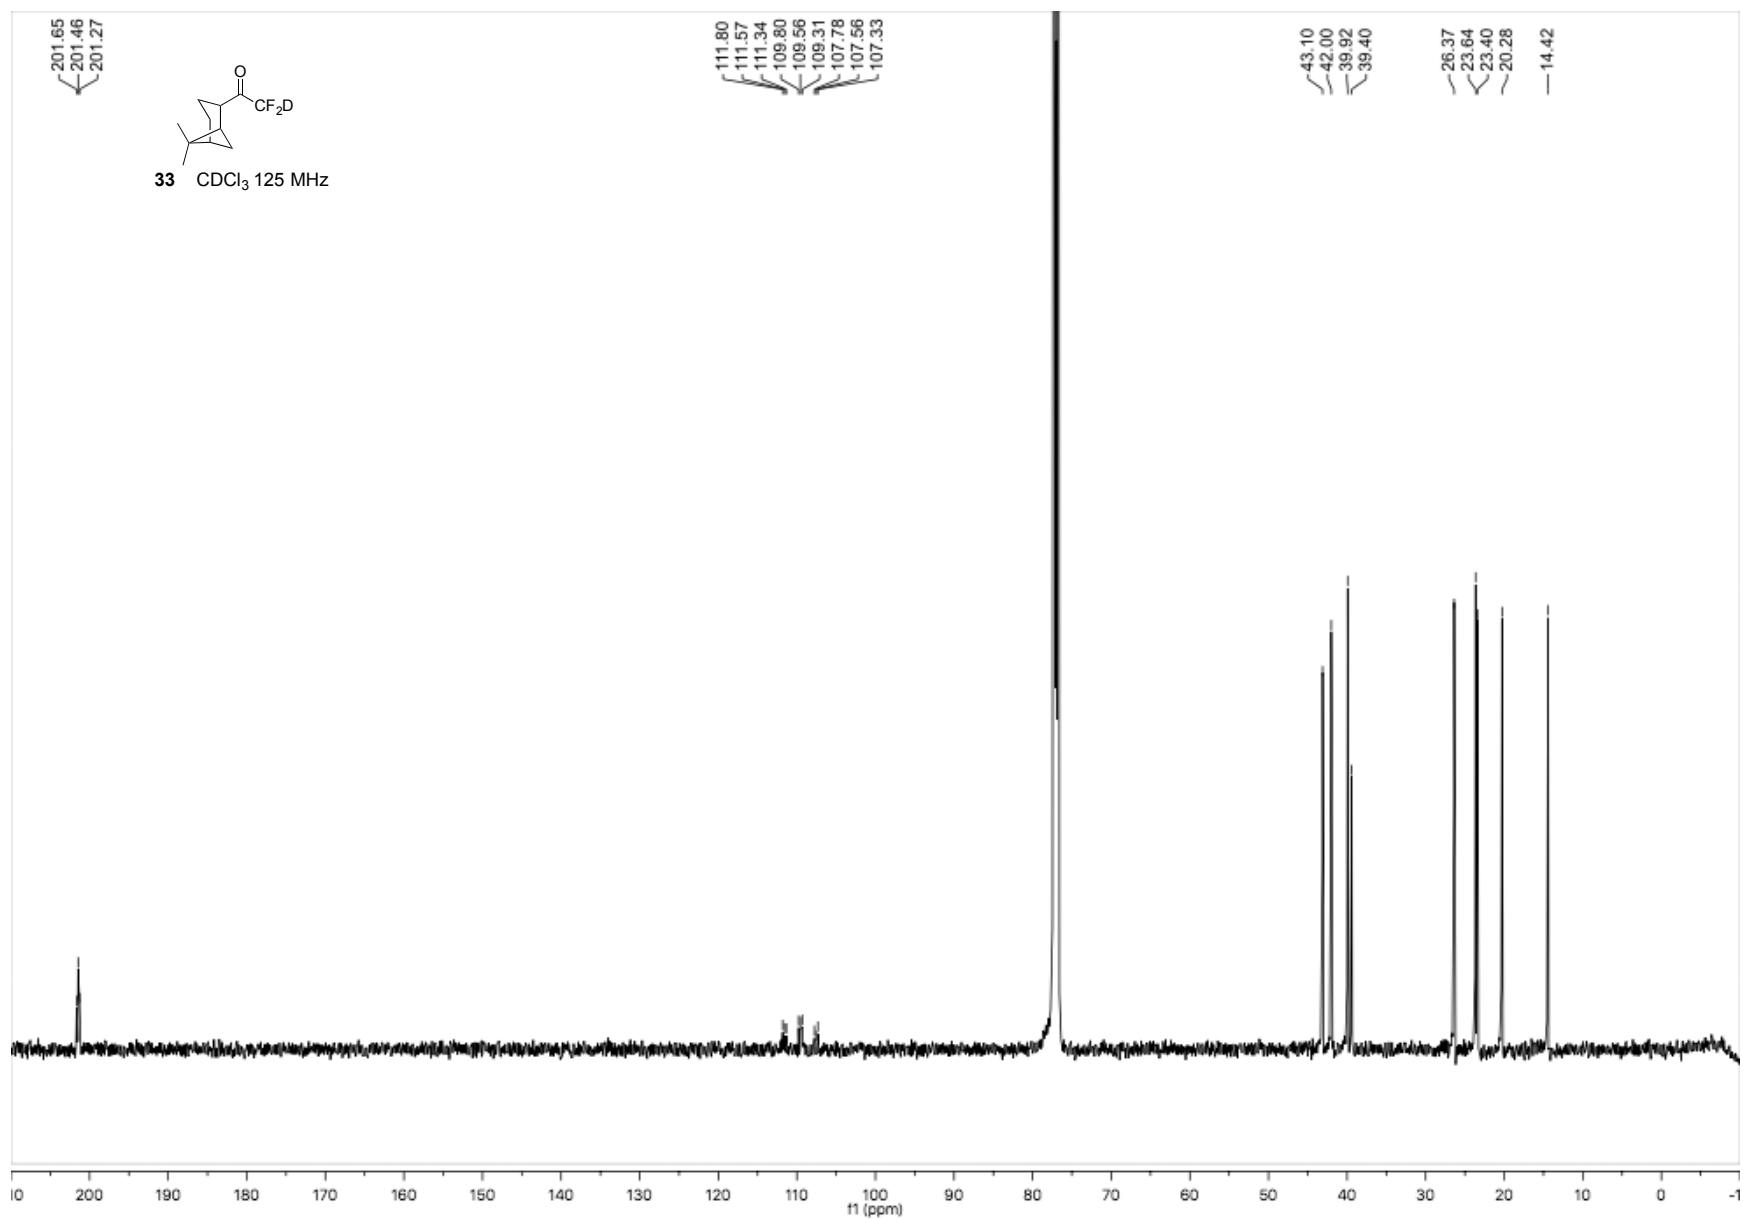

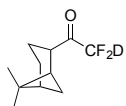

33 CDCl<sub>3</sub> 282 MHz

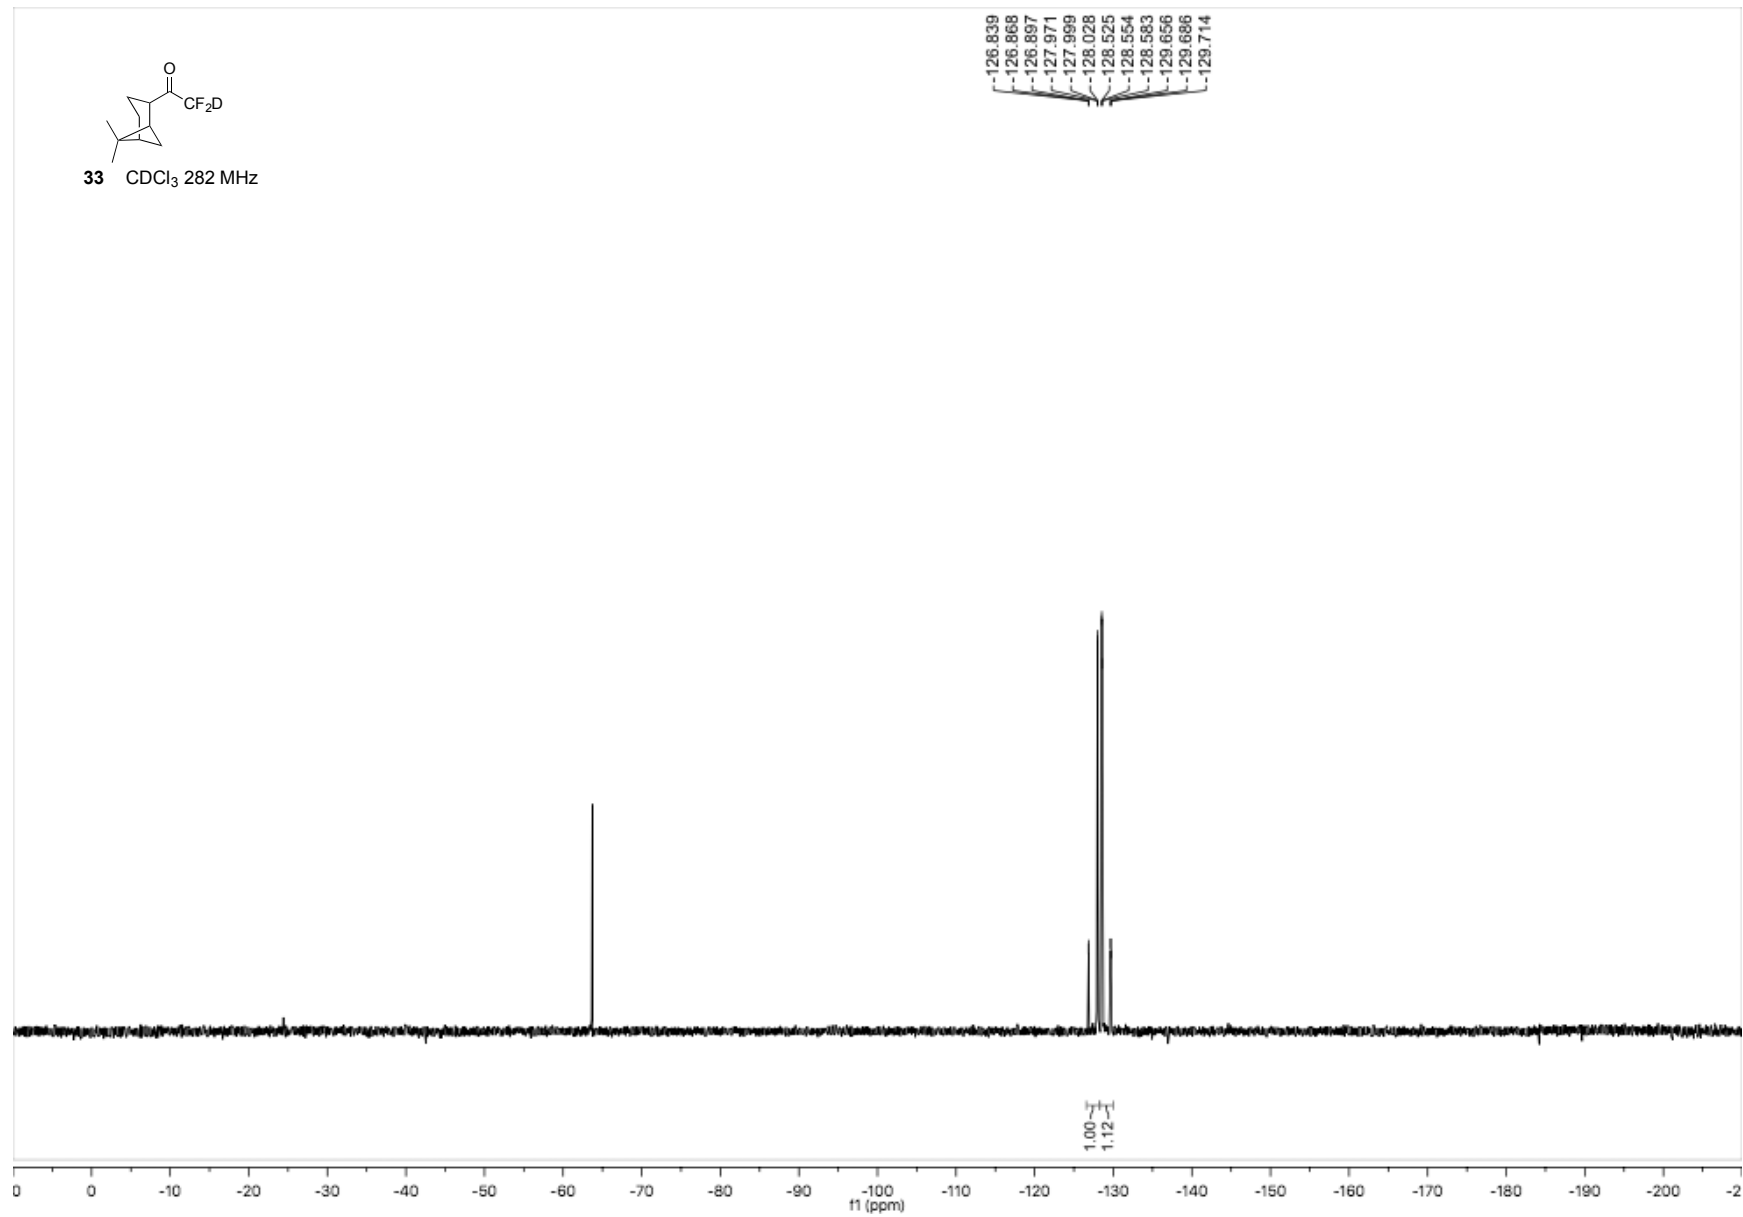



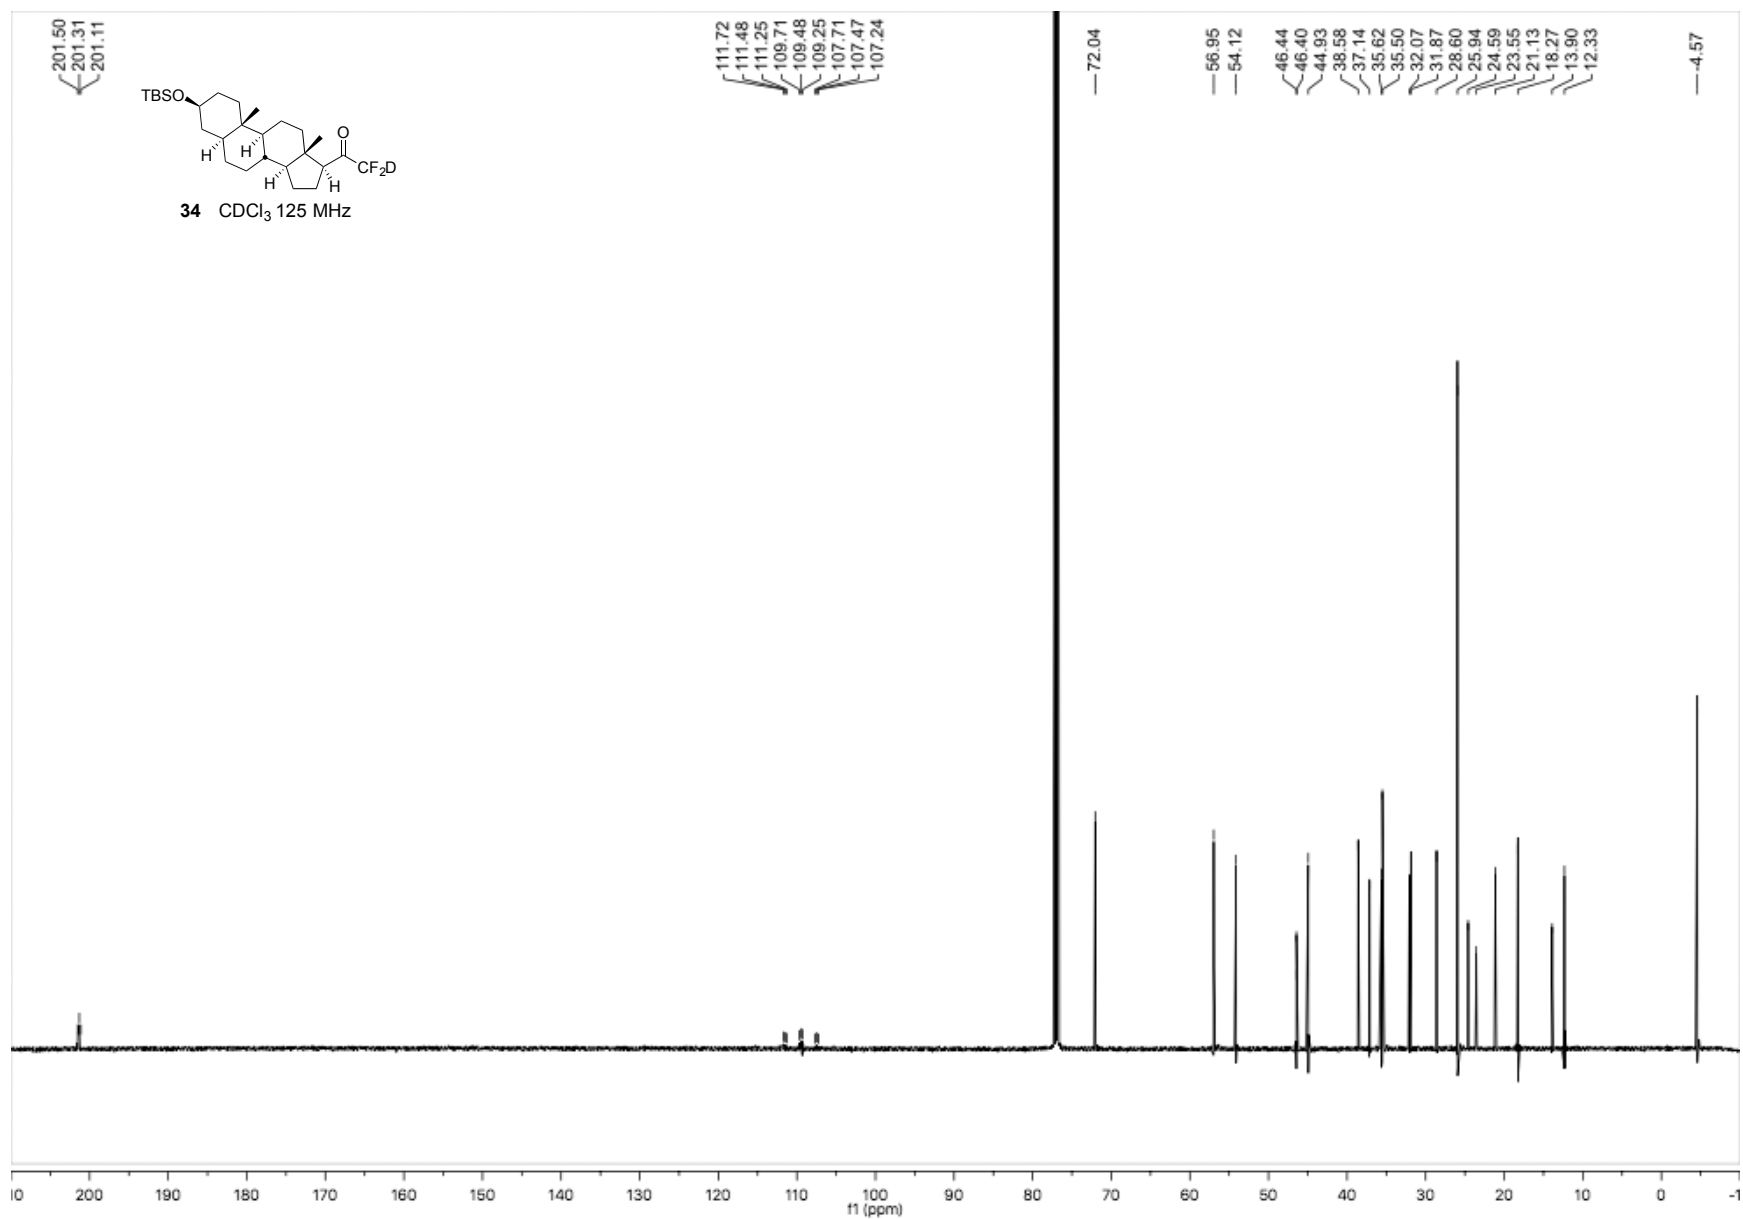



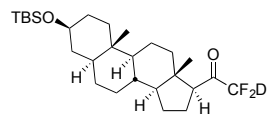

34 CDCl<sub>3</sub> 282 MHz

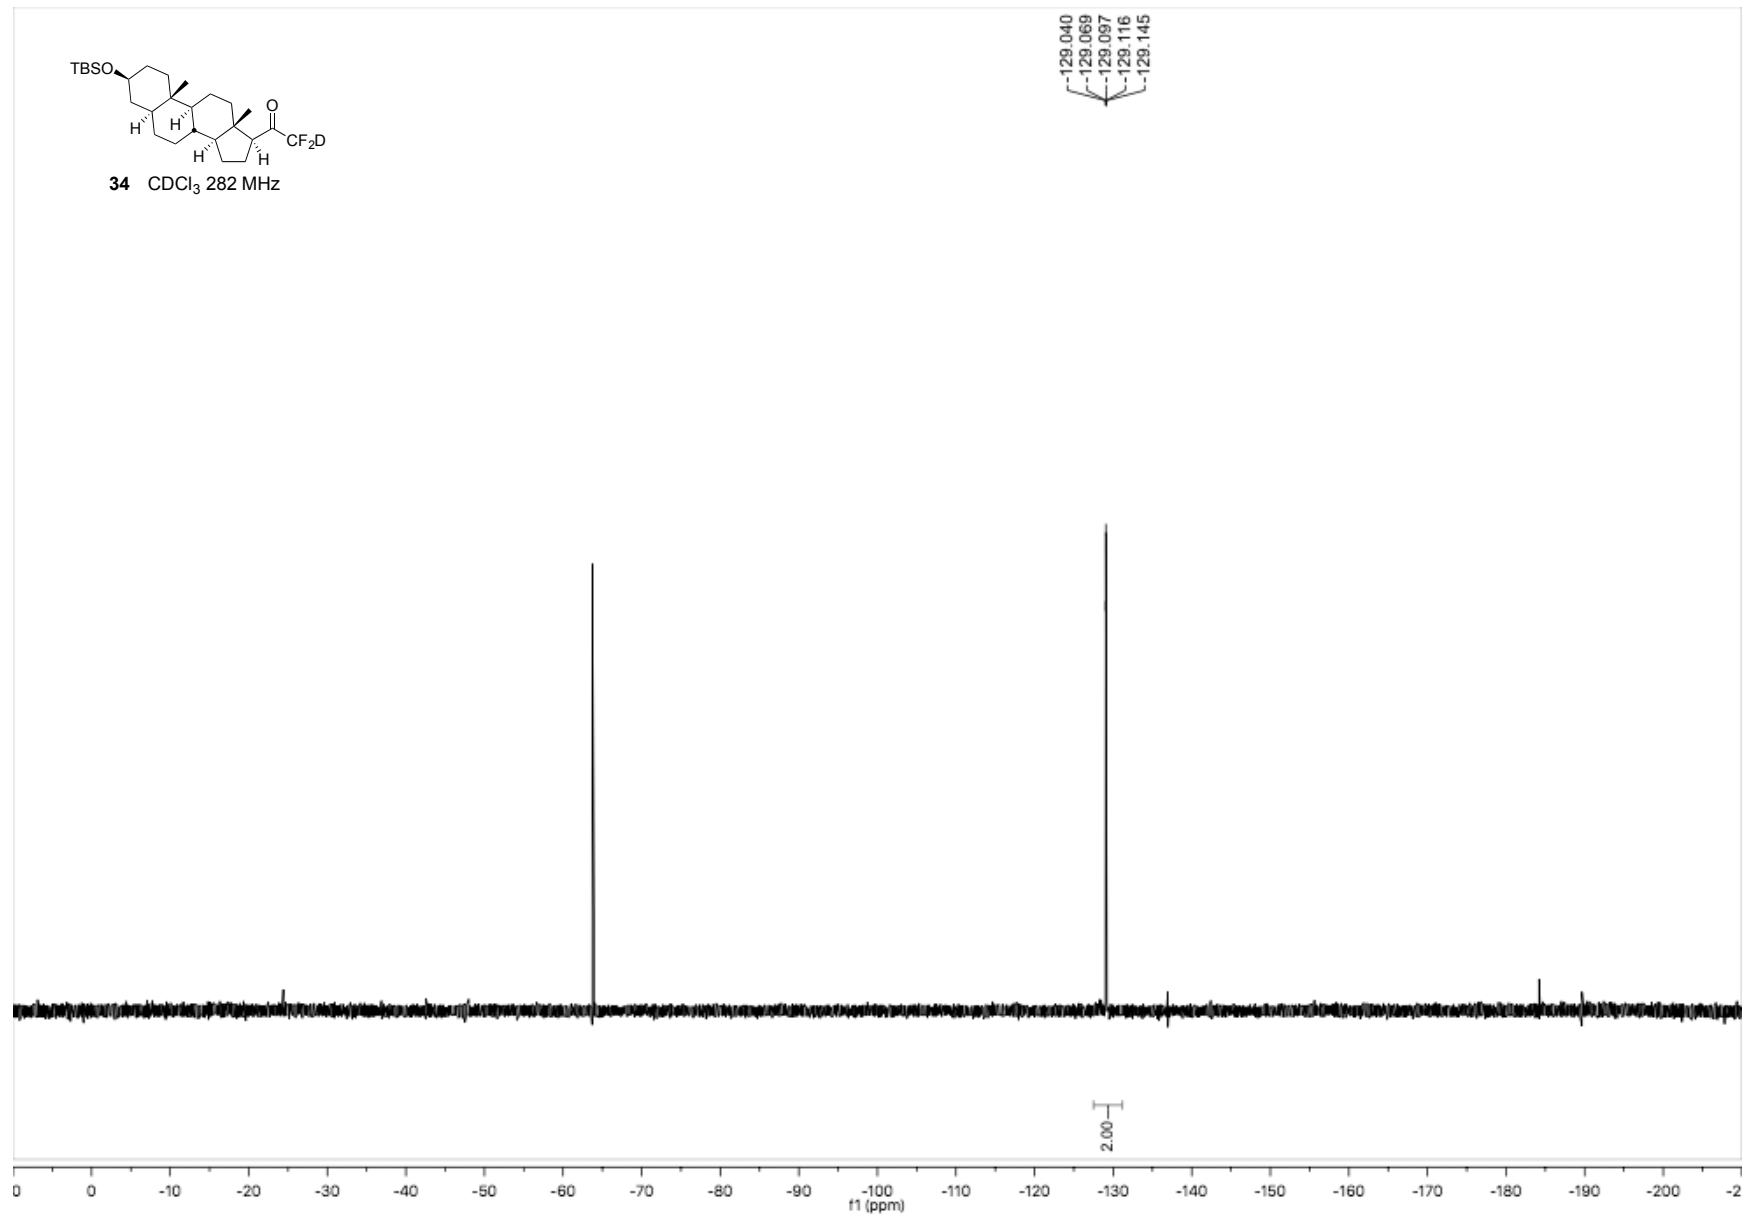

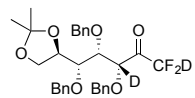

**35** (CD<sub>3</sub>)<sub>2</sub>CO 400 MHz  
(d.r. = 4:3)

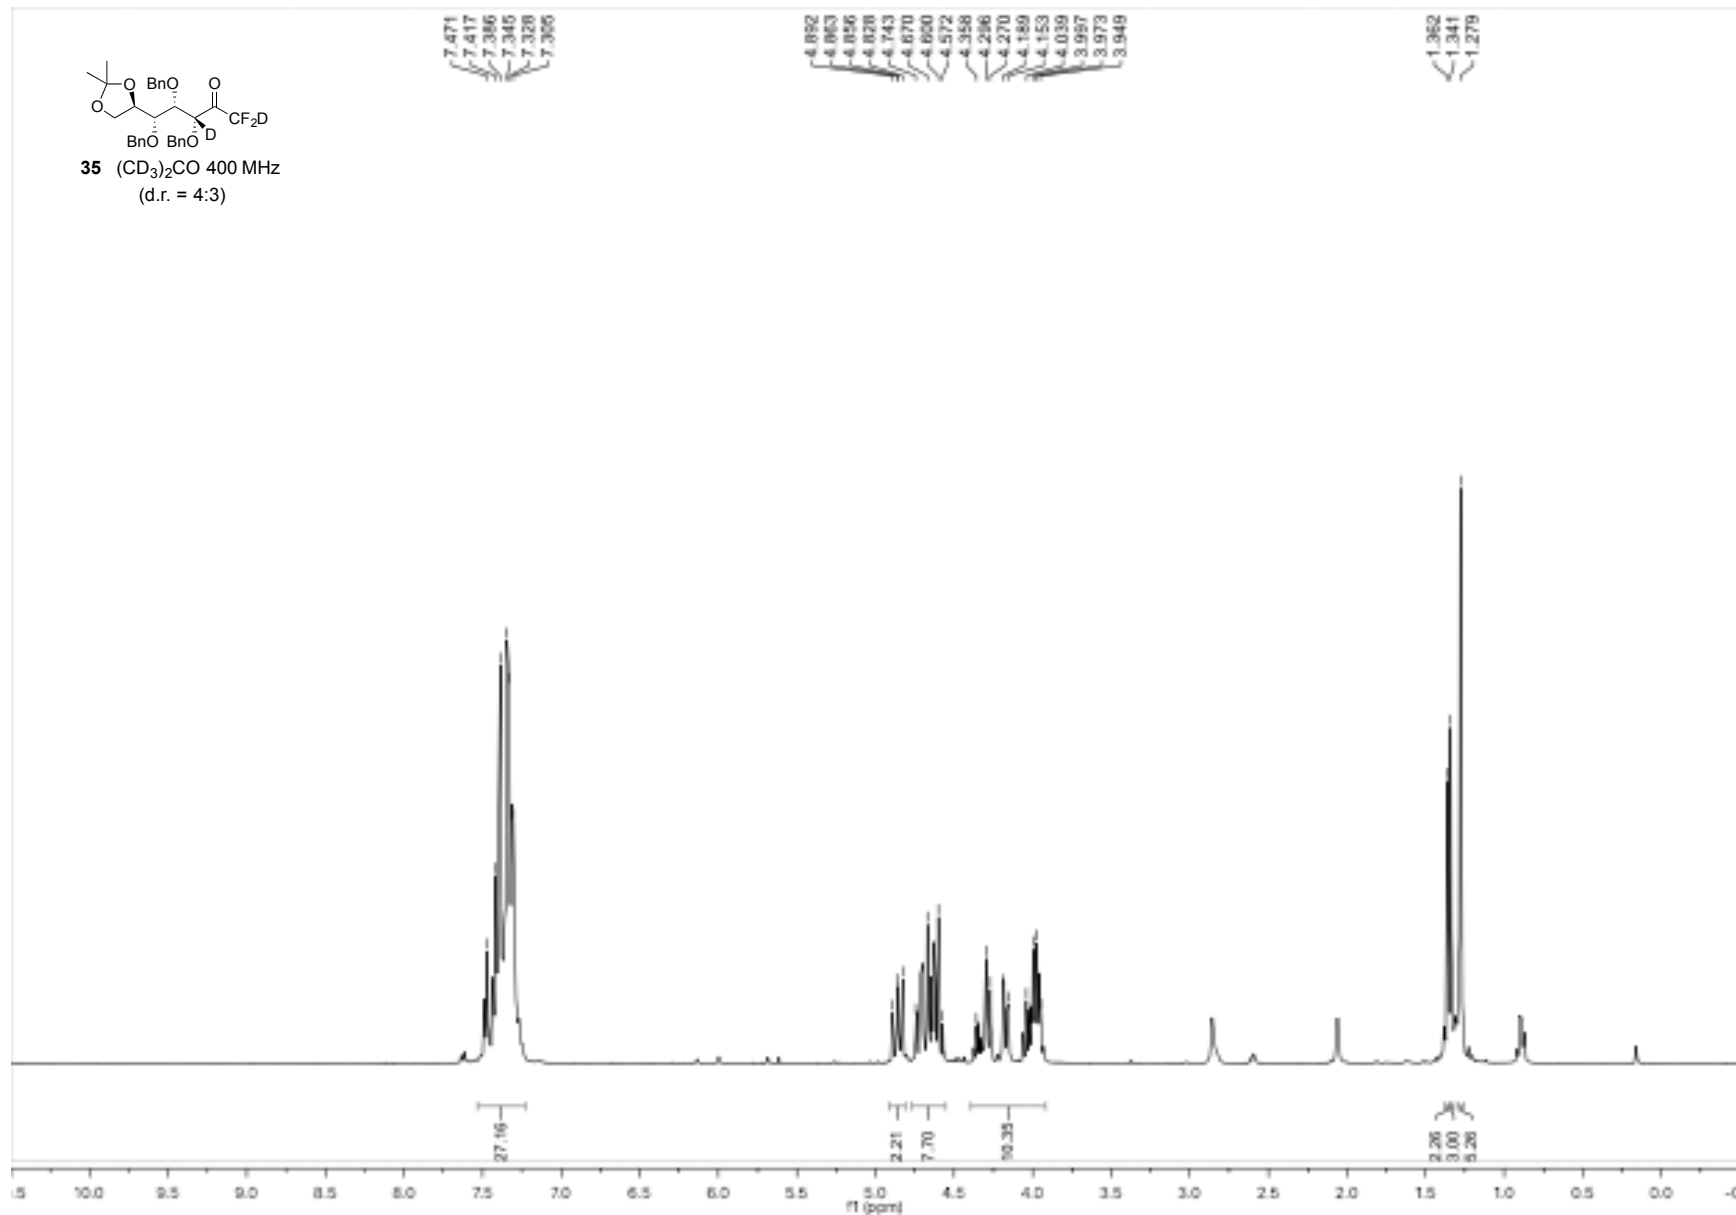

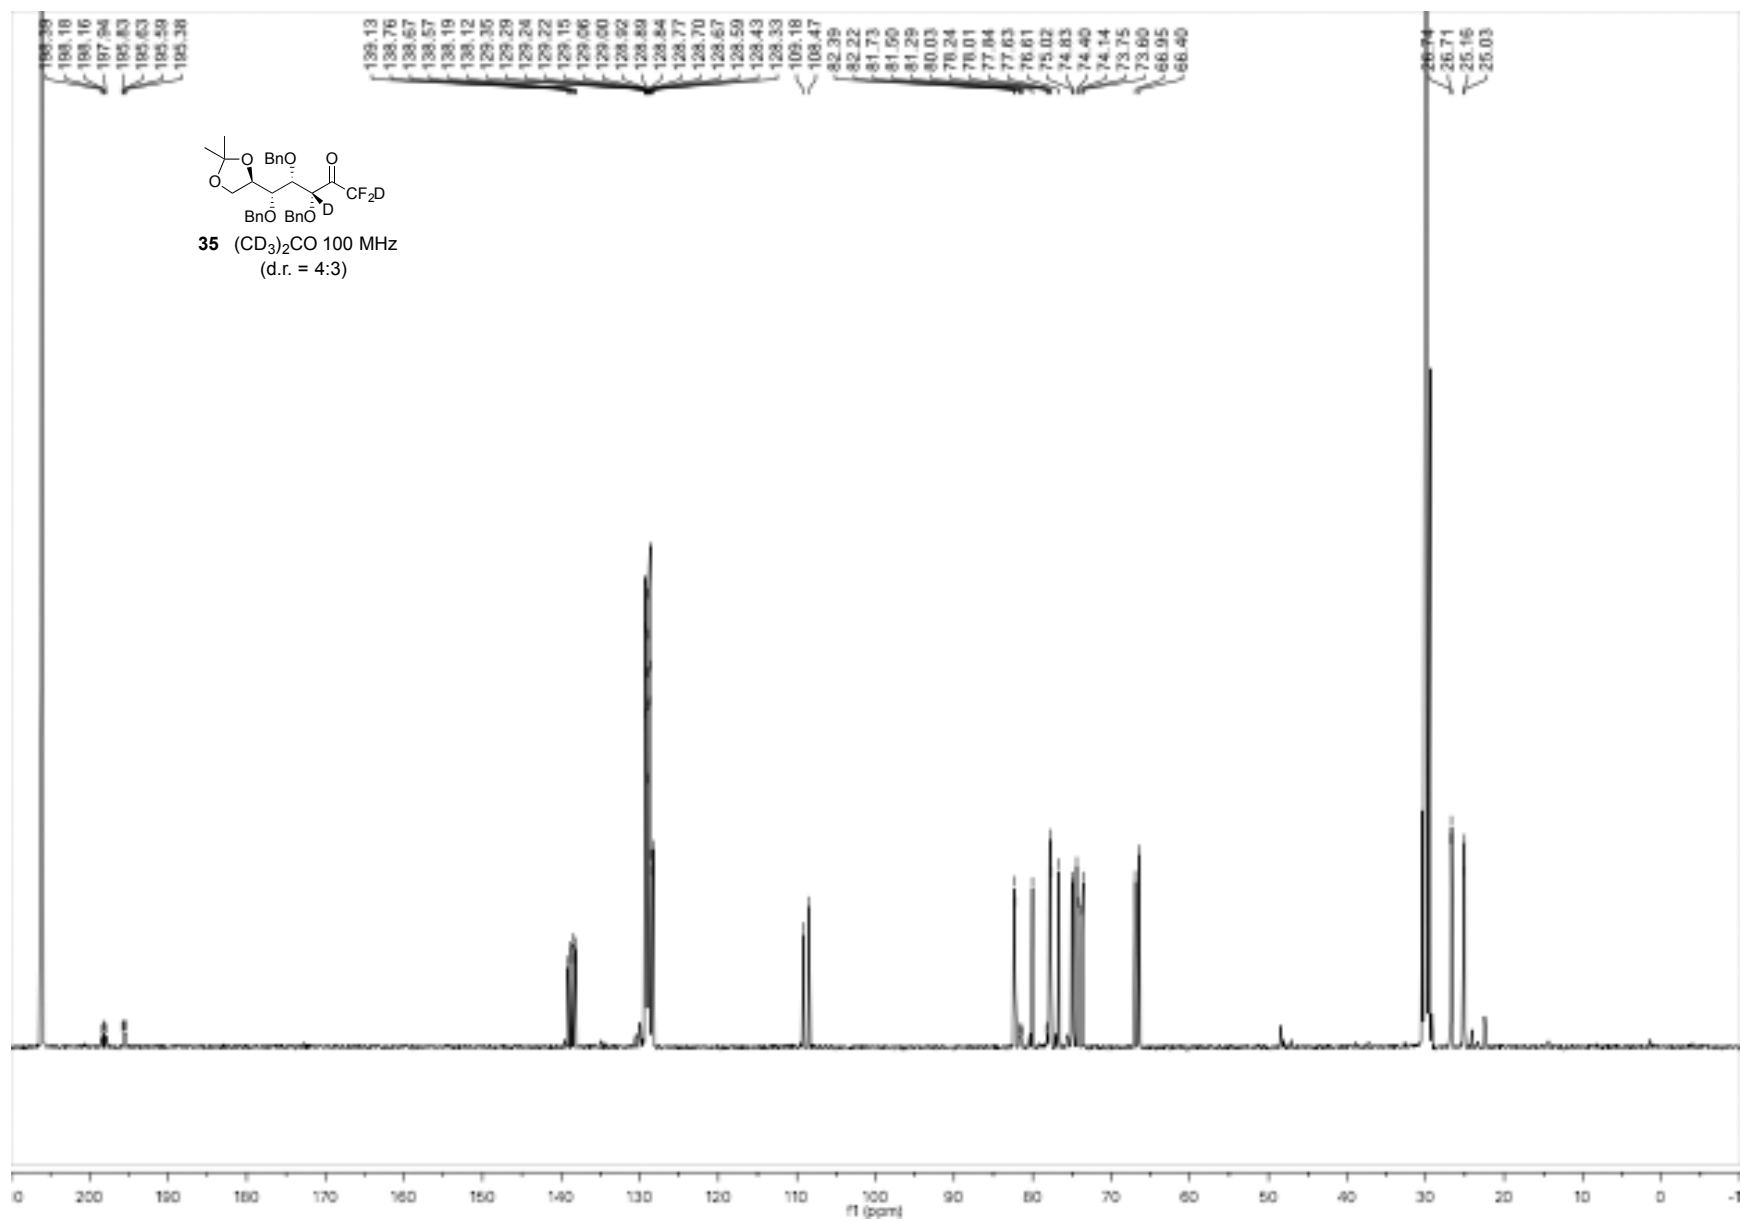

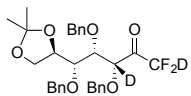

**35** (CD<sub>3</sub>)<sub>2</sub>CO 376 MHz  
(d.r. = 4:3)

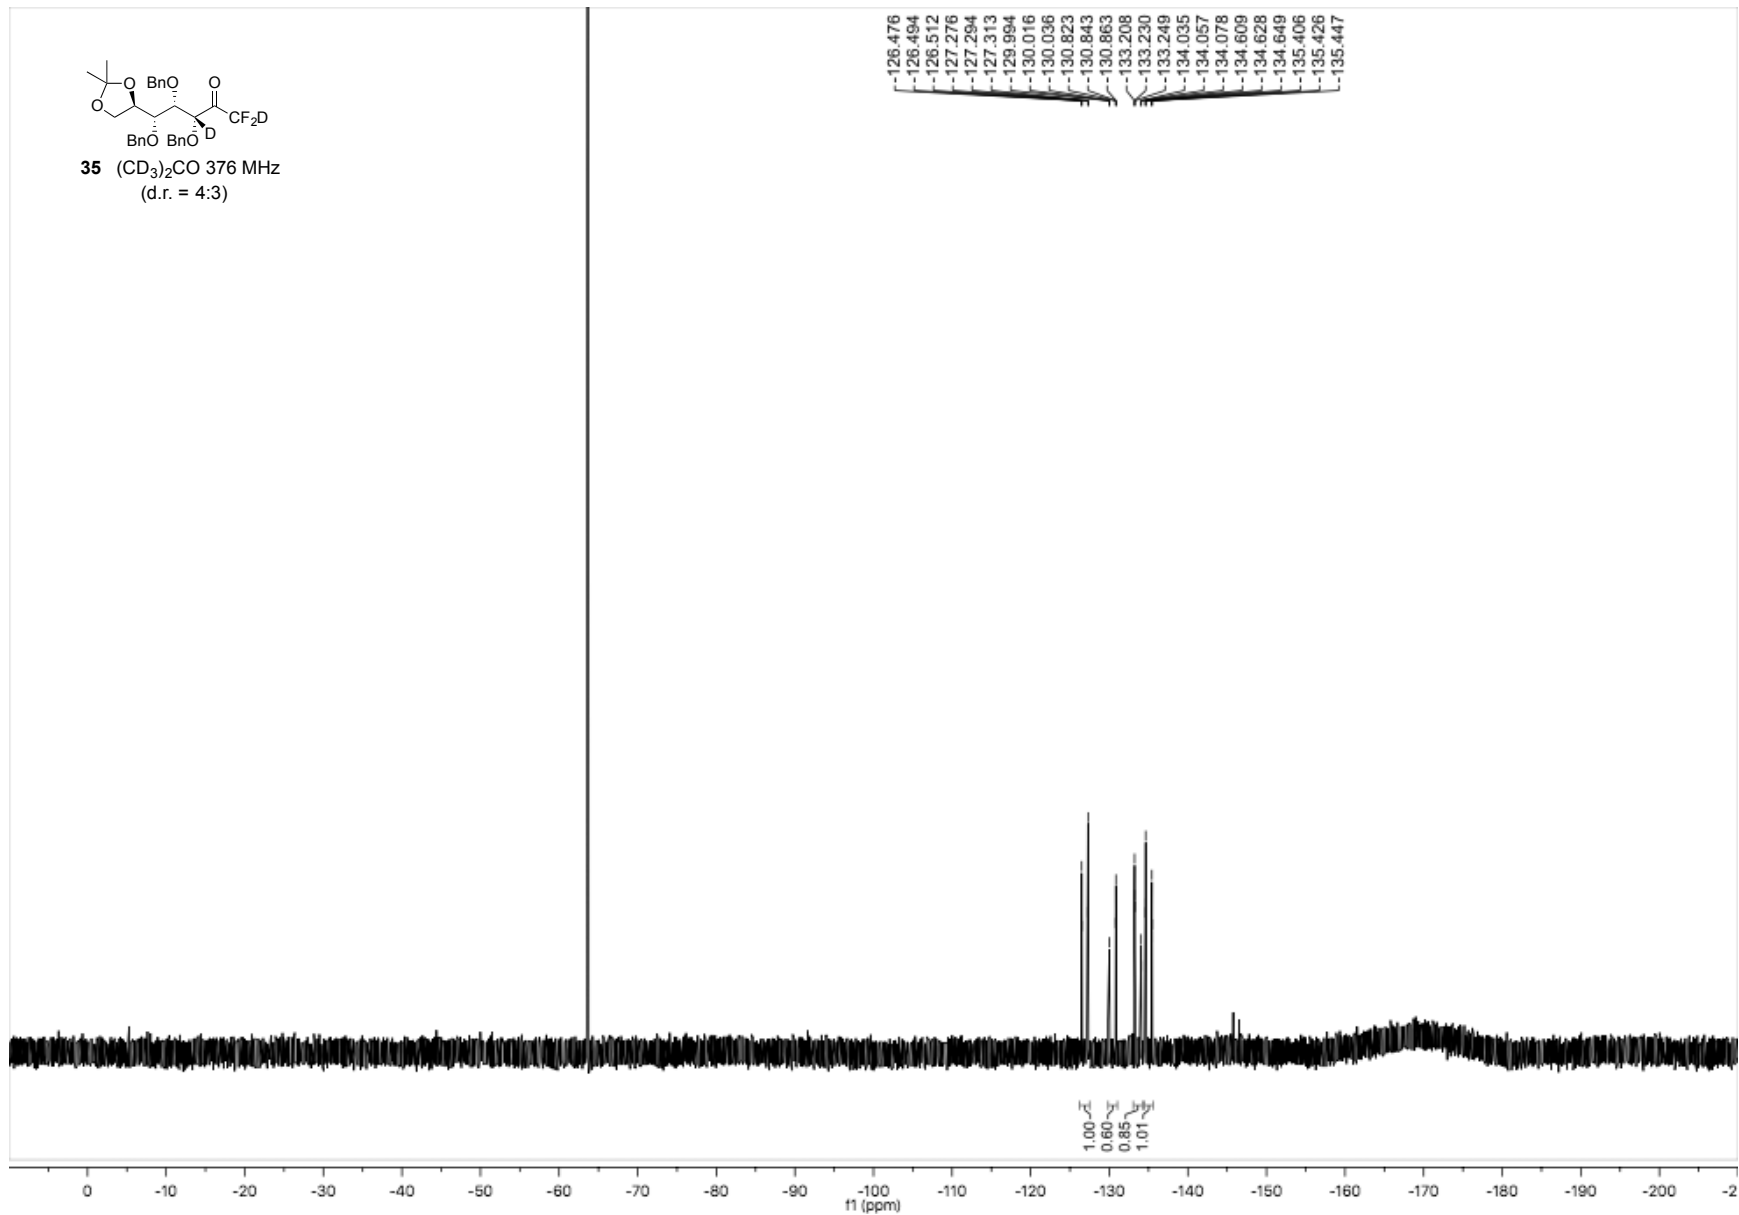

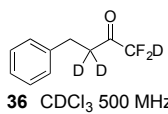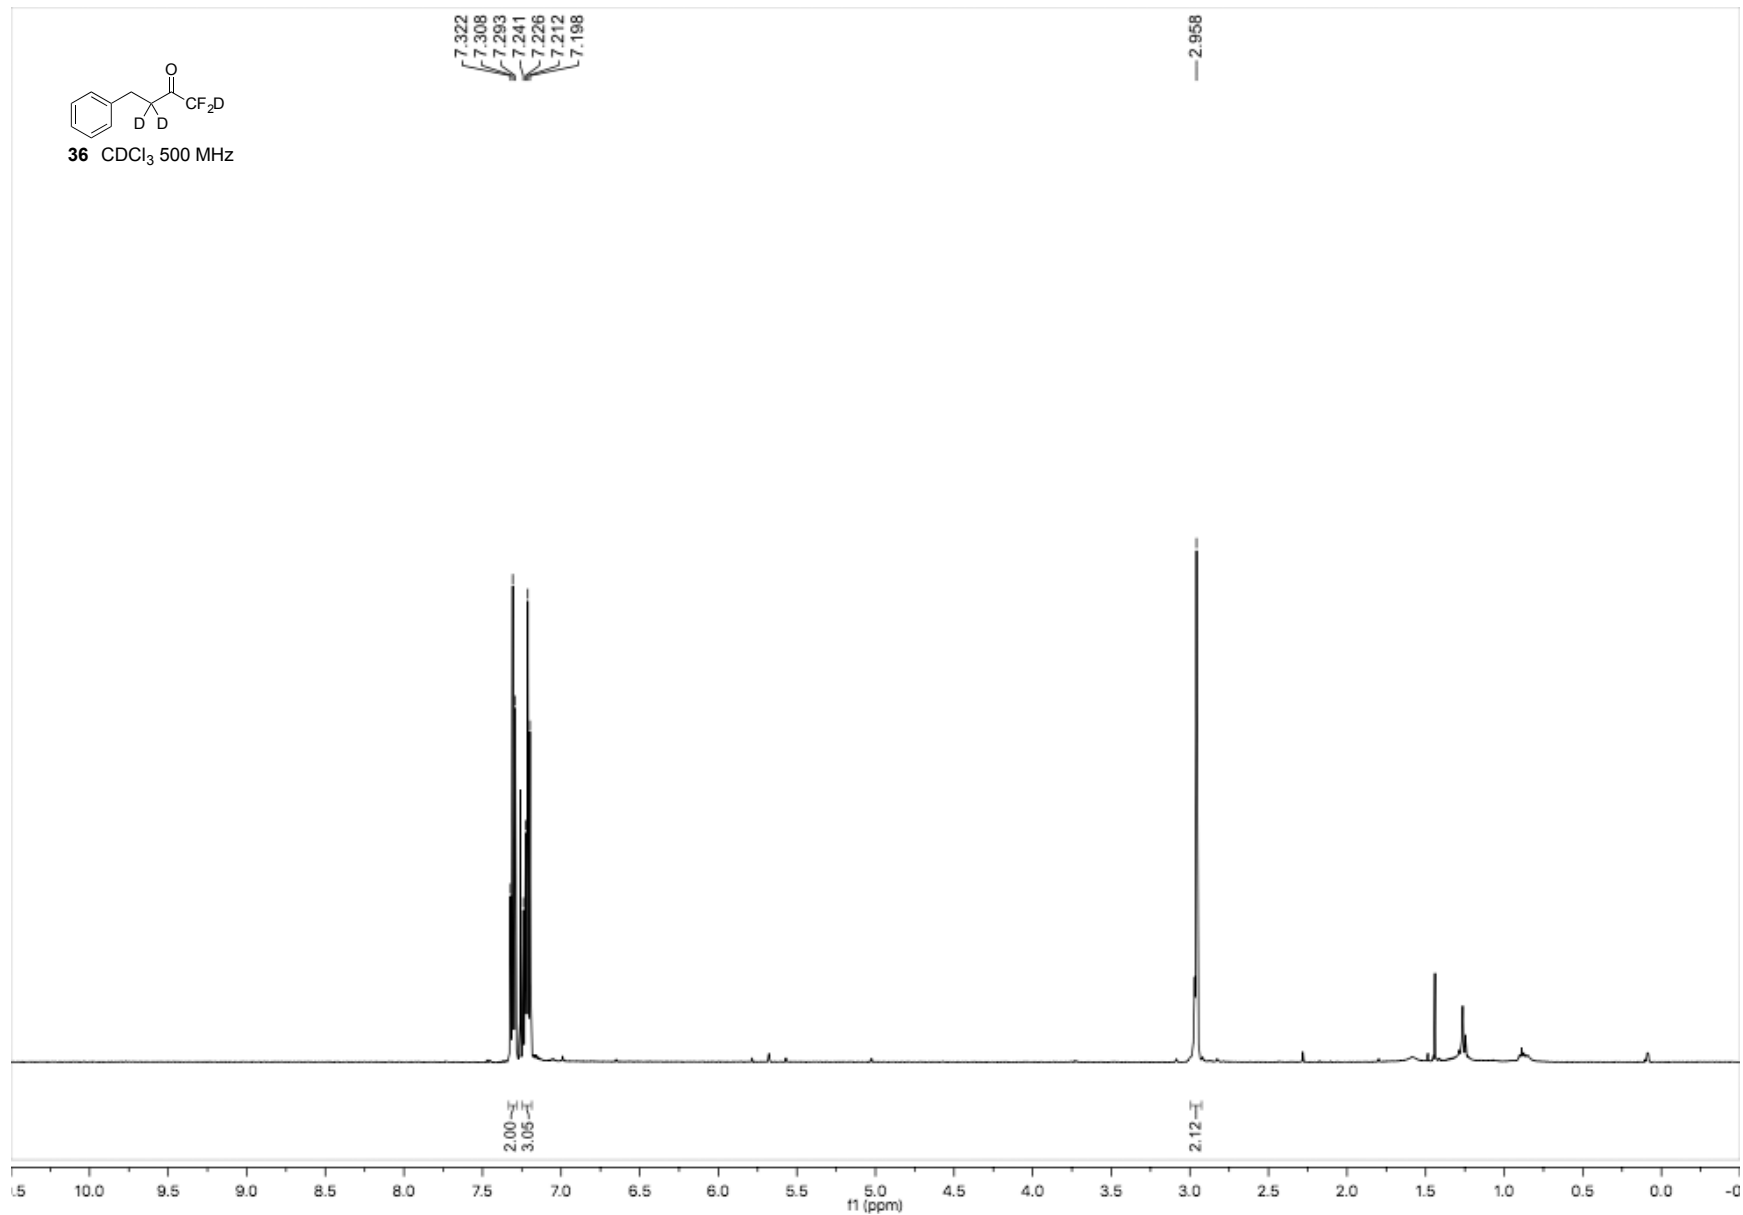

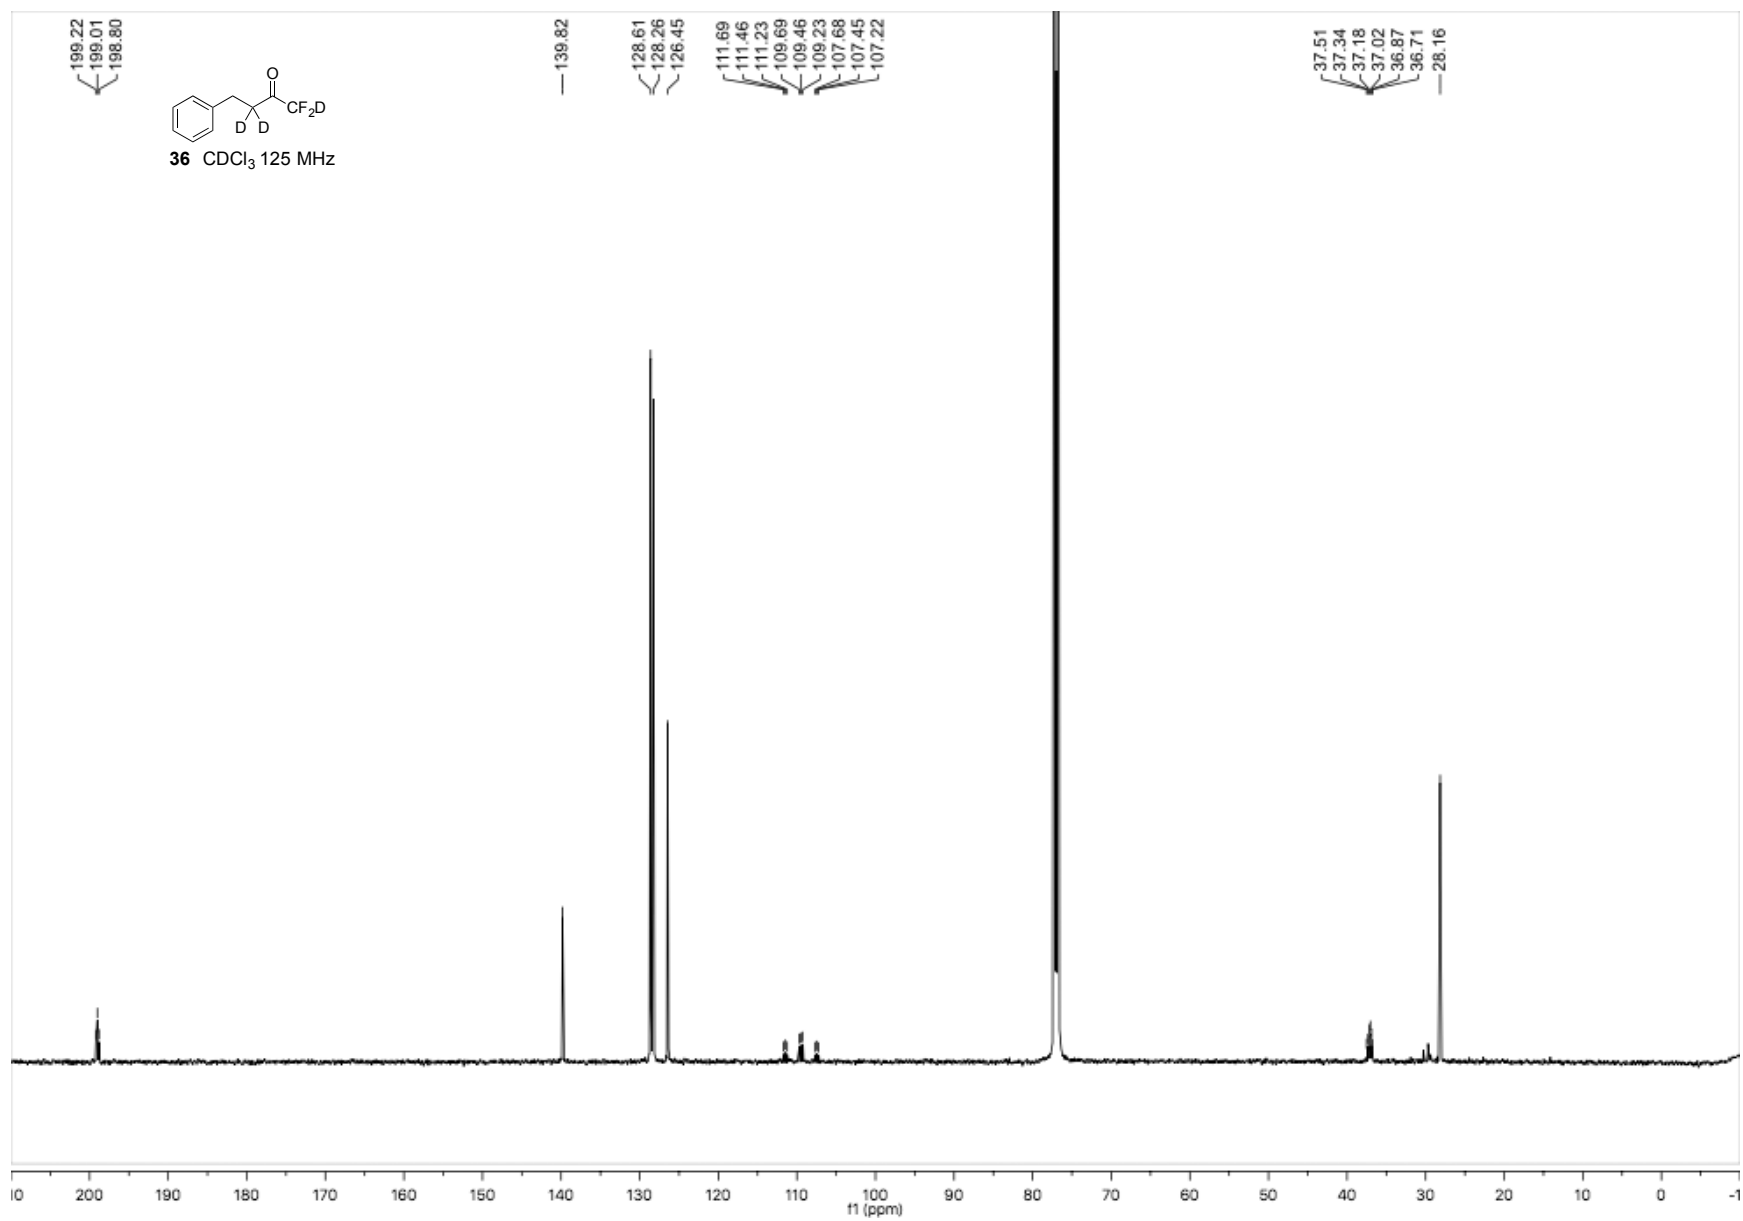

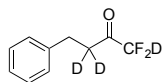

36 CDCl<sub>3</sub> 282 MHz

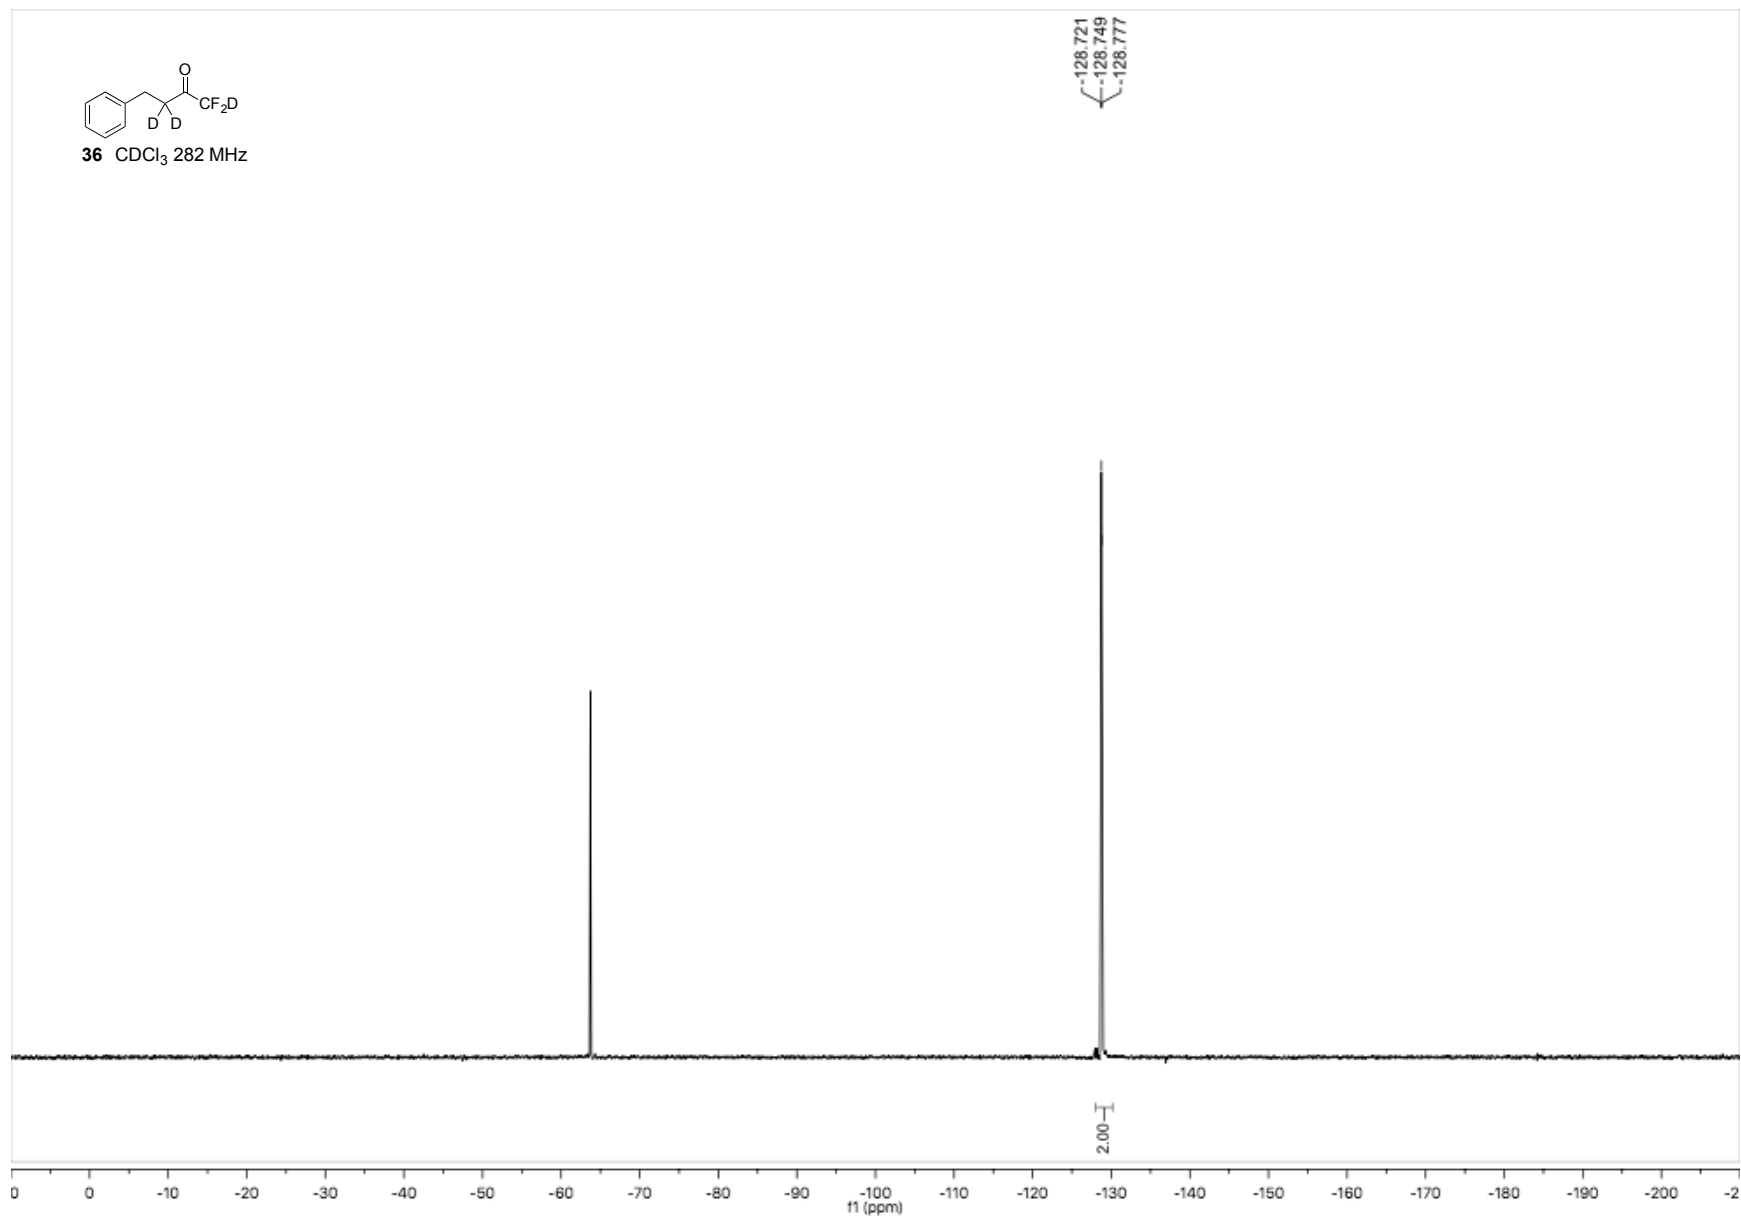

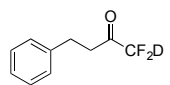

37 CDCl<sub>3</sub> 300 MHz

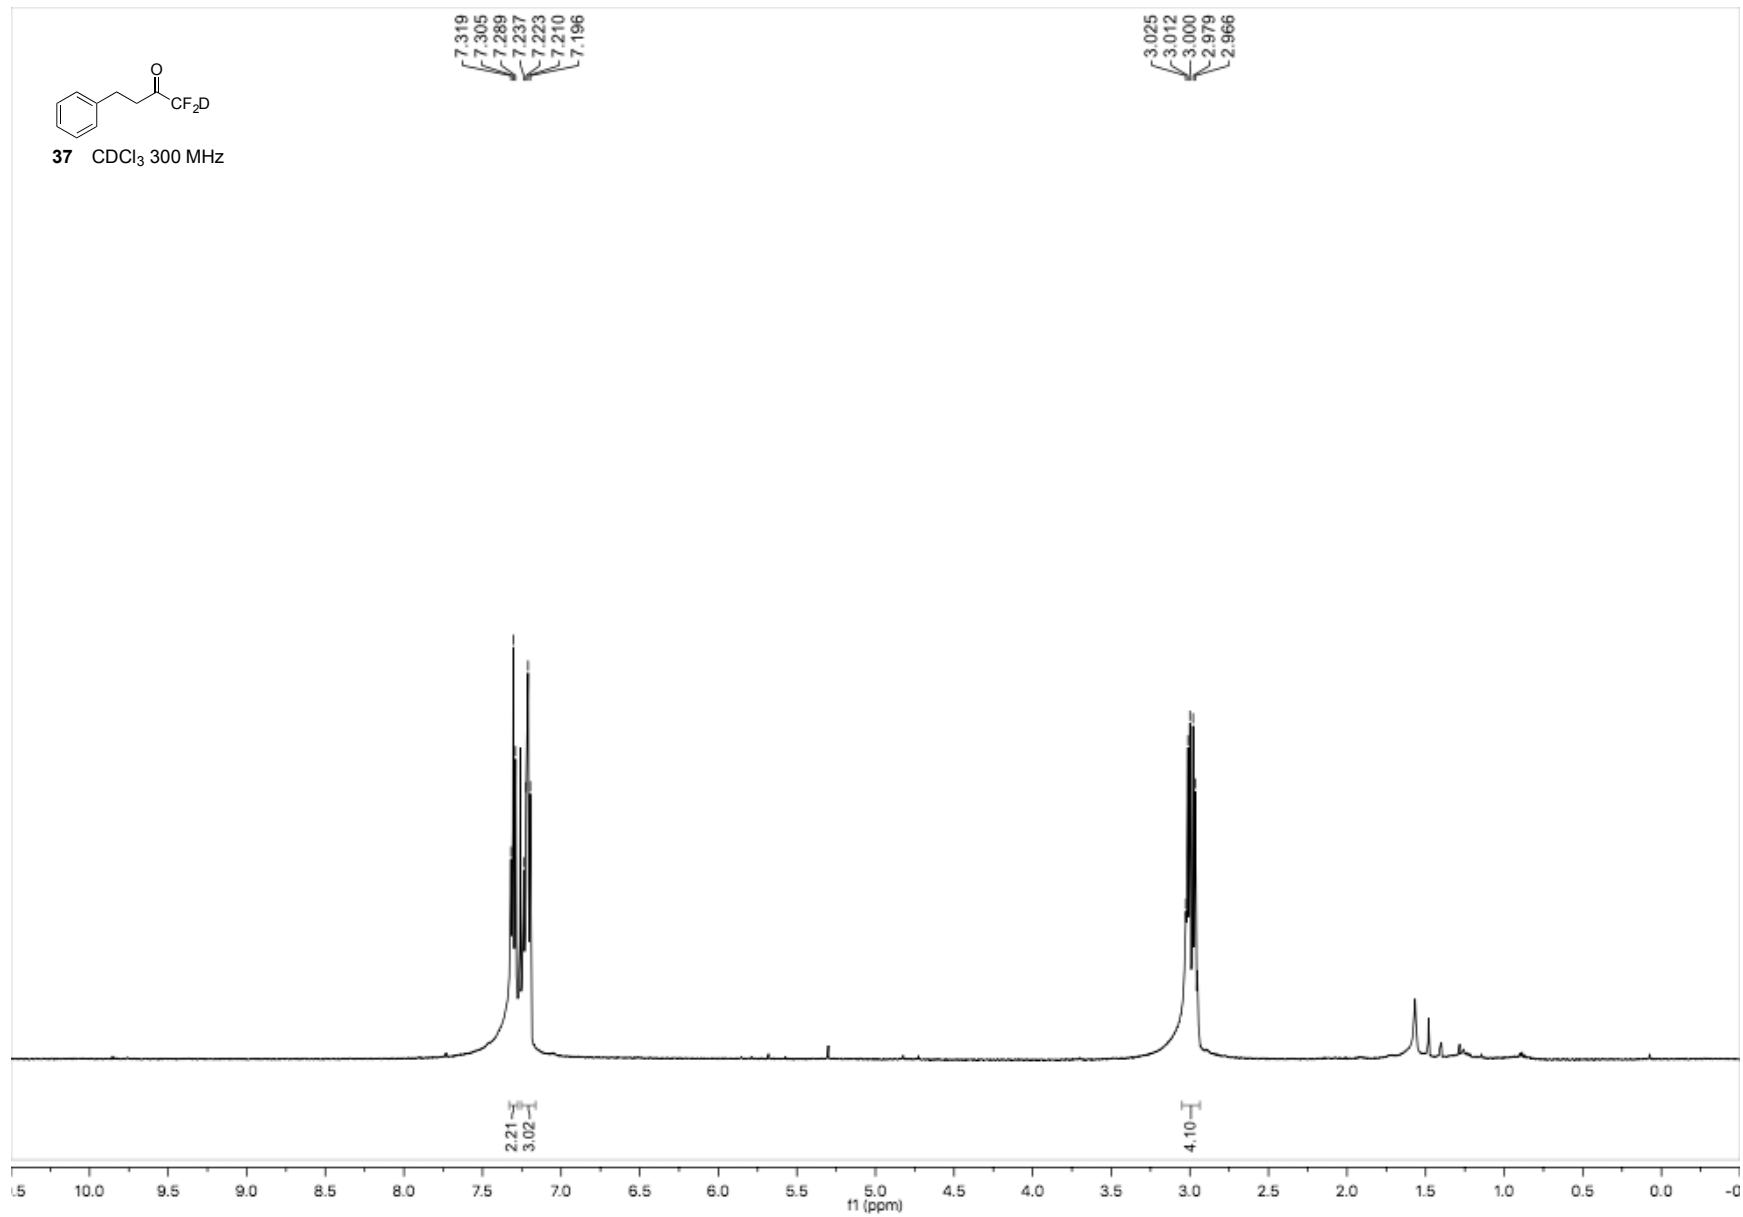



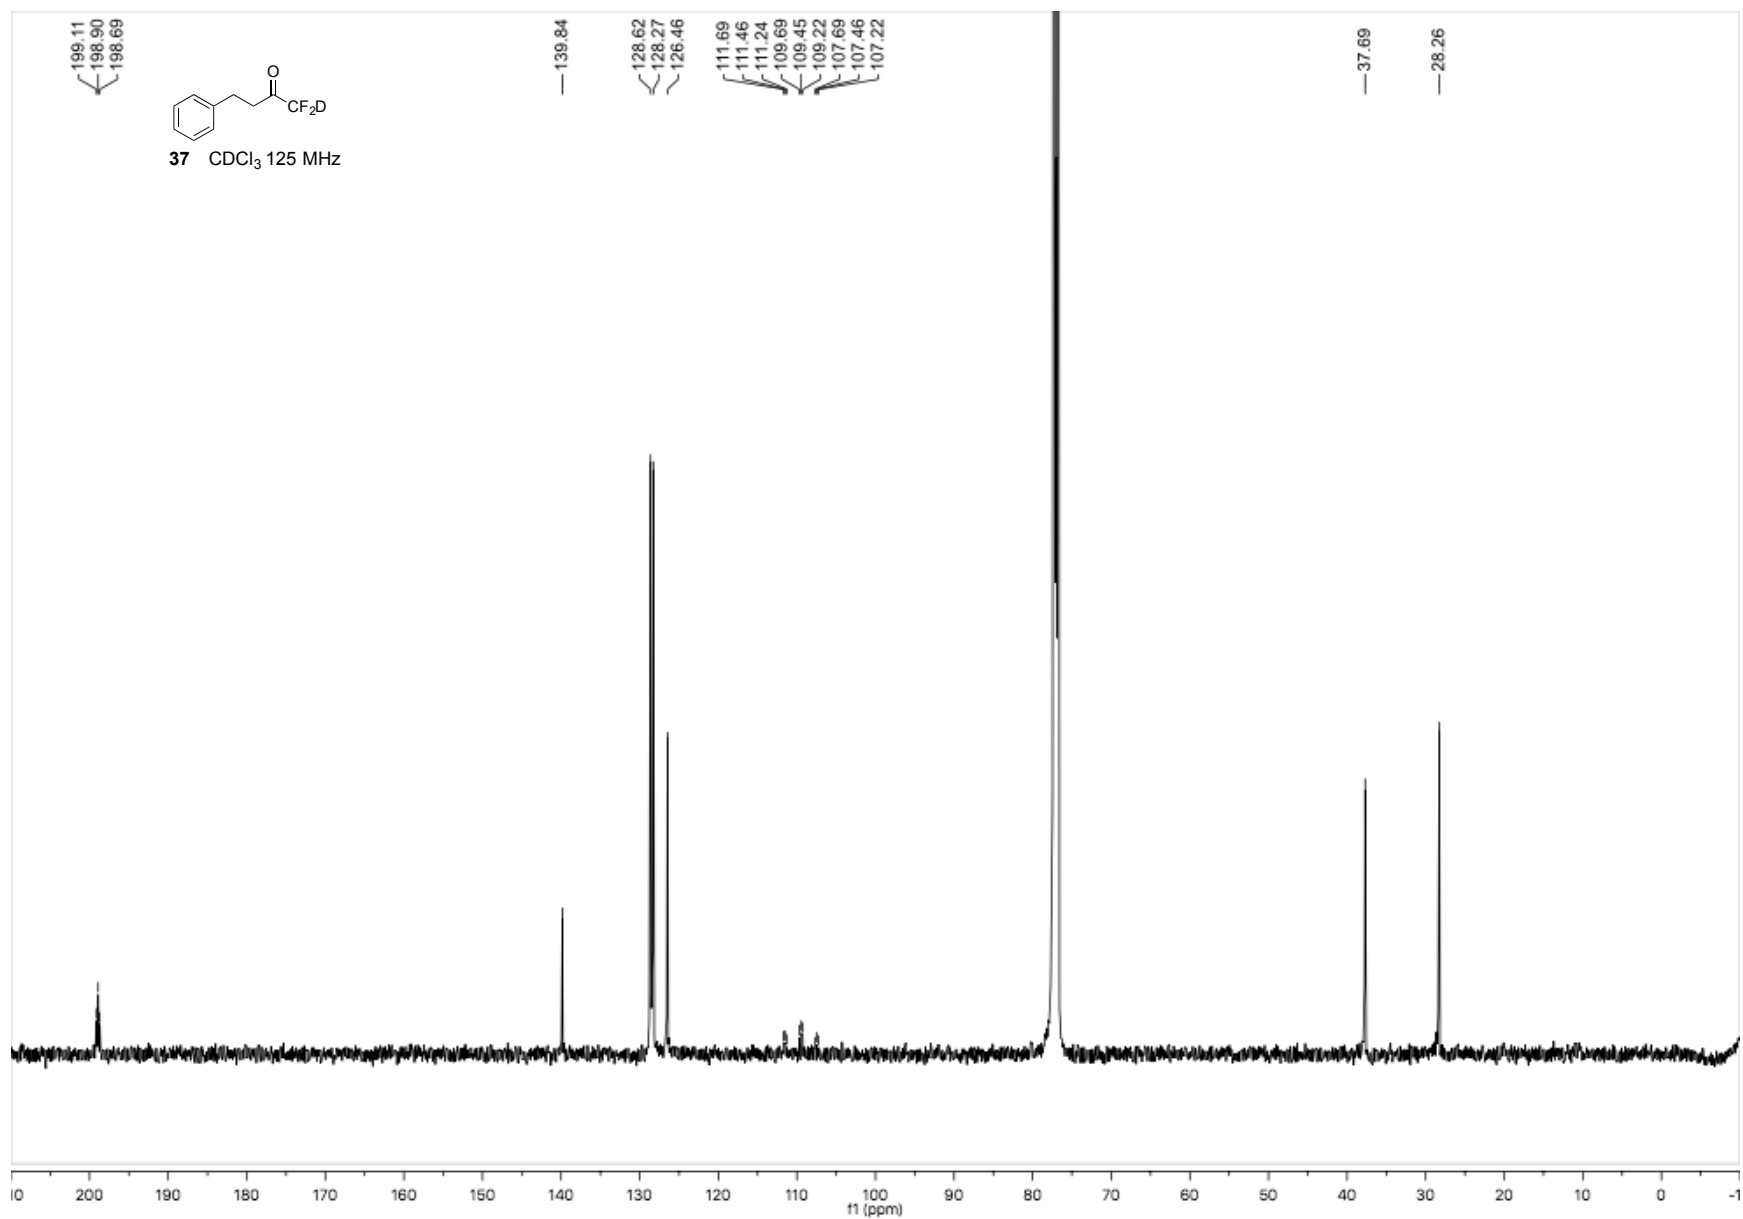

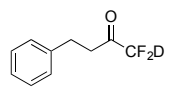

37 CDCl<sub>3</sub> 282 MHz

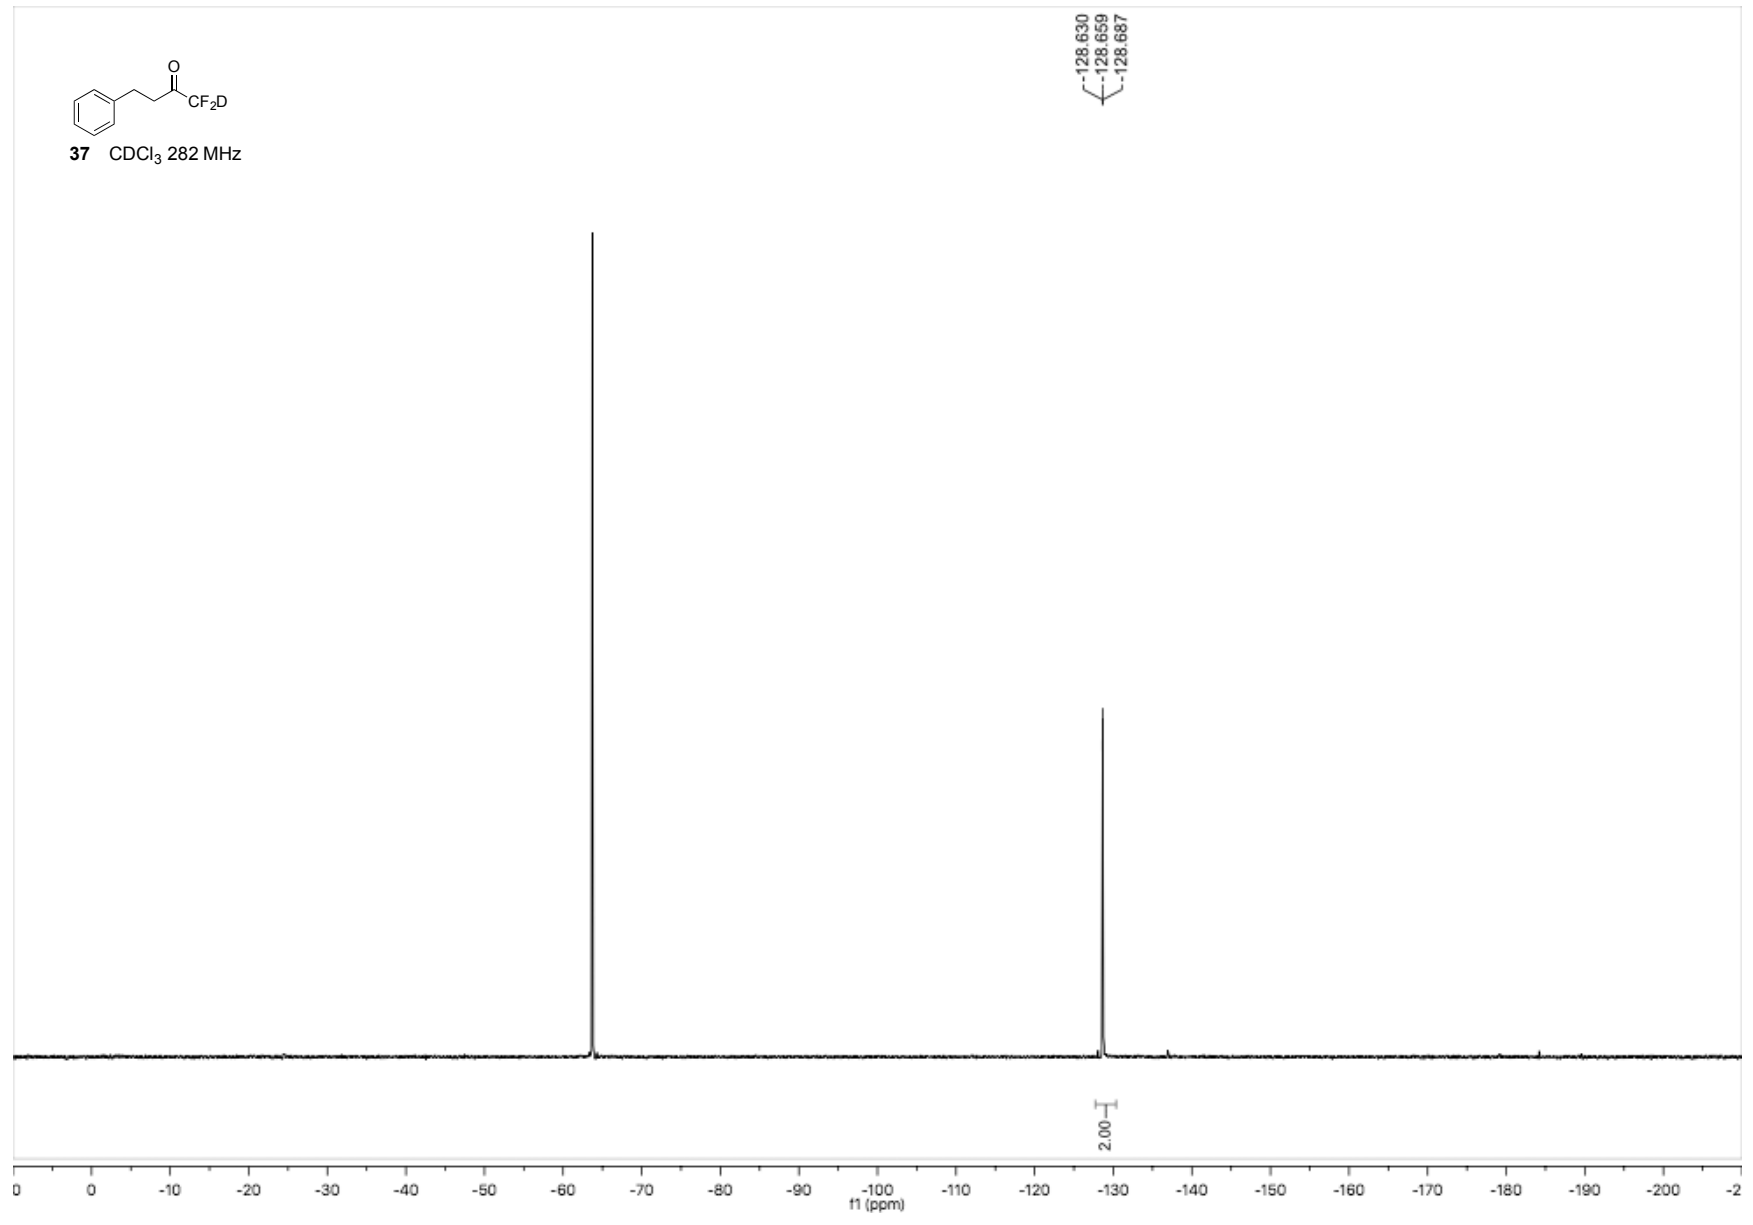

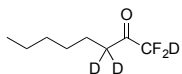

38 CDCl<sub>3</sub> 300 MHz

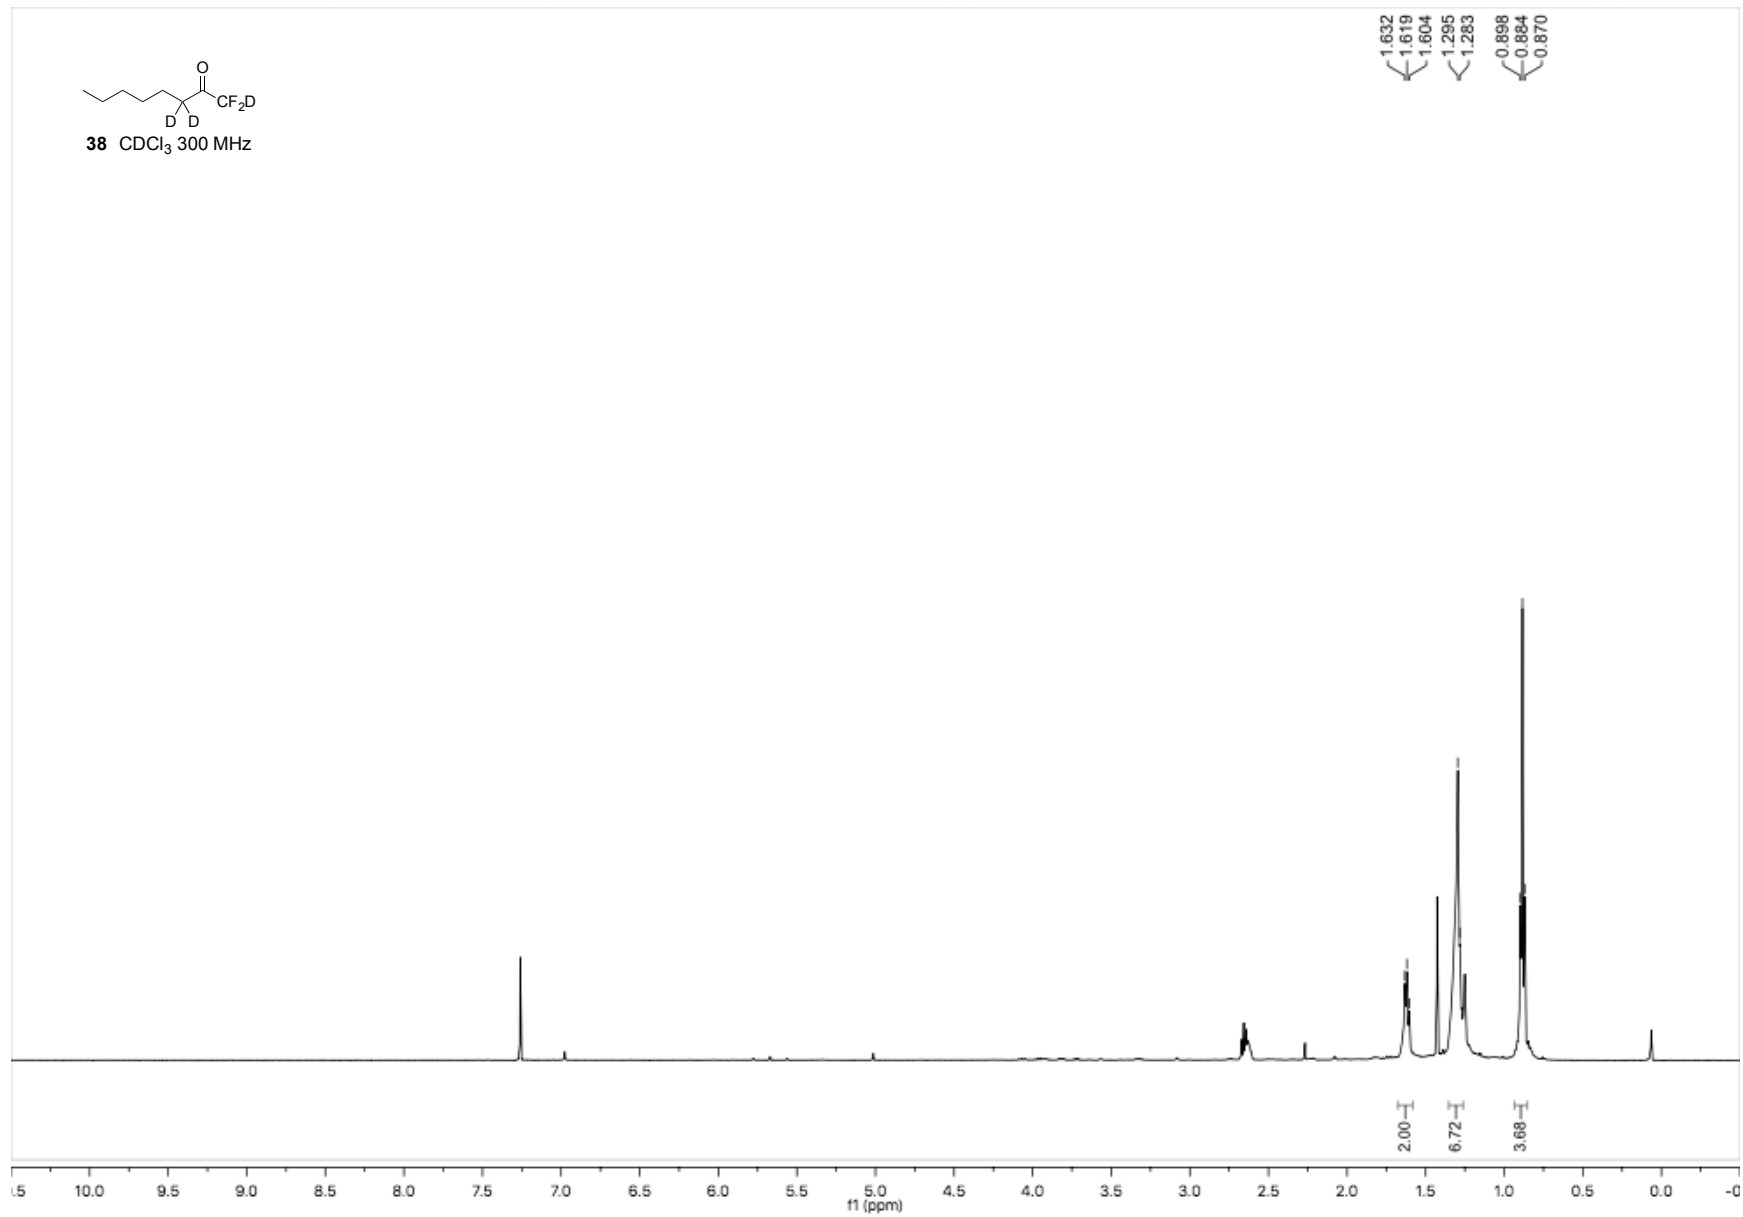

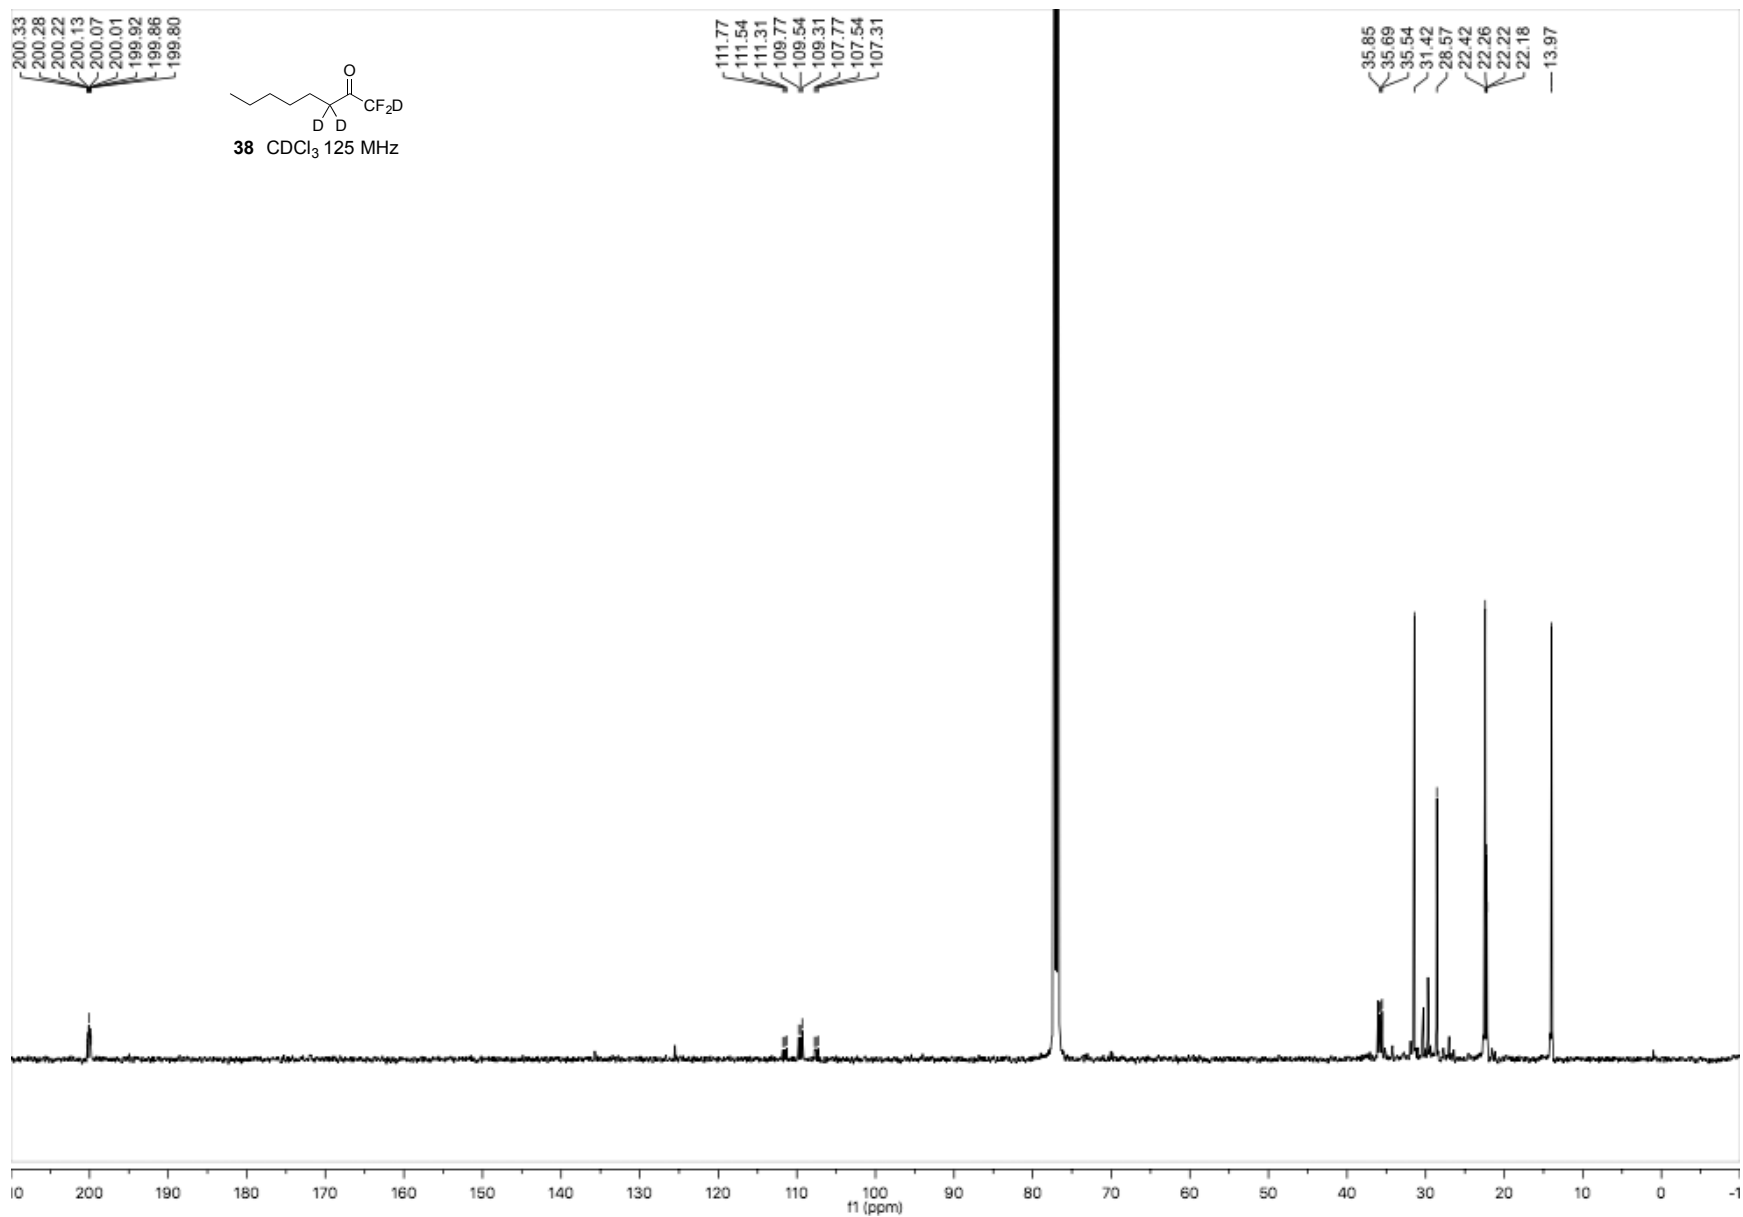

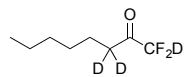

38 CDCl<sub>3</sub> 282 MHz

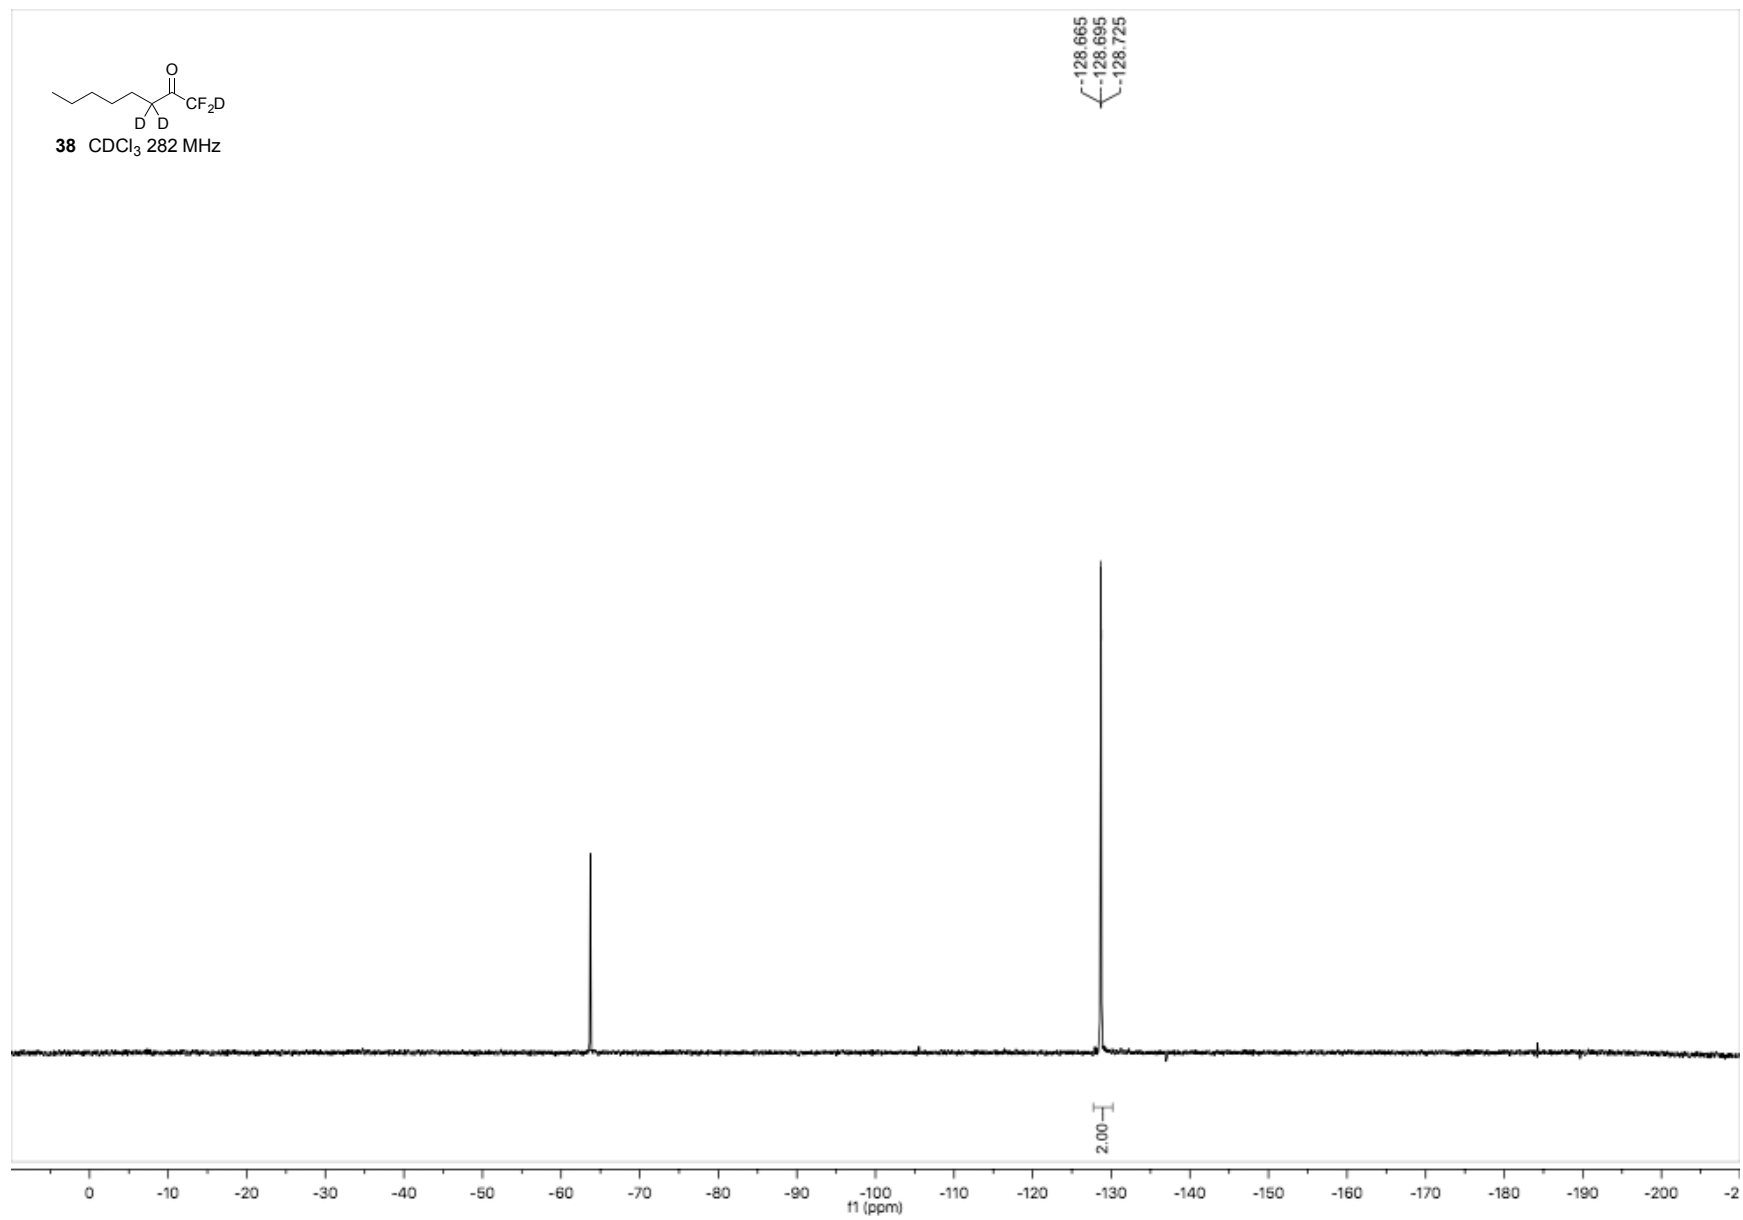

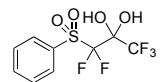

43 CDCl<sub>3</sub> 400 MHz

8.046  
8.026  
7.843  
7.825  
7.806  
7.684  
7.665  
7.645

5.176

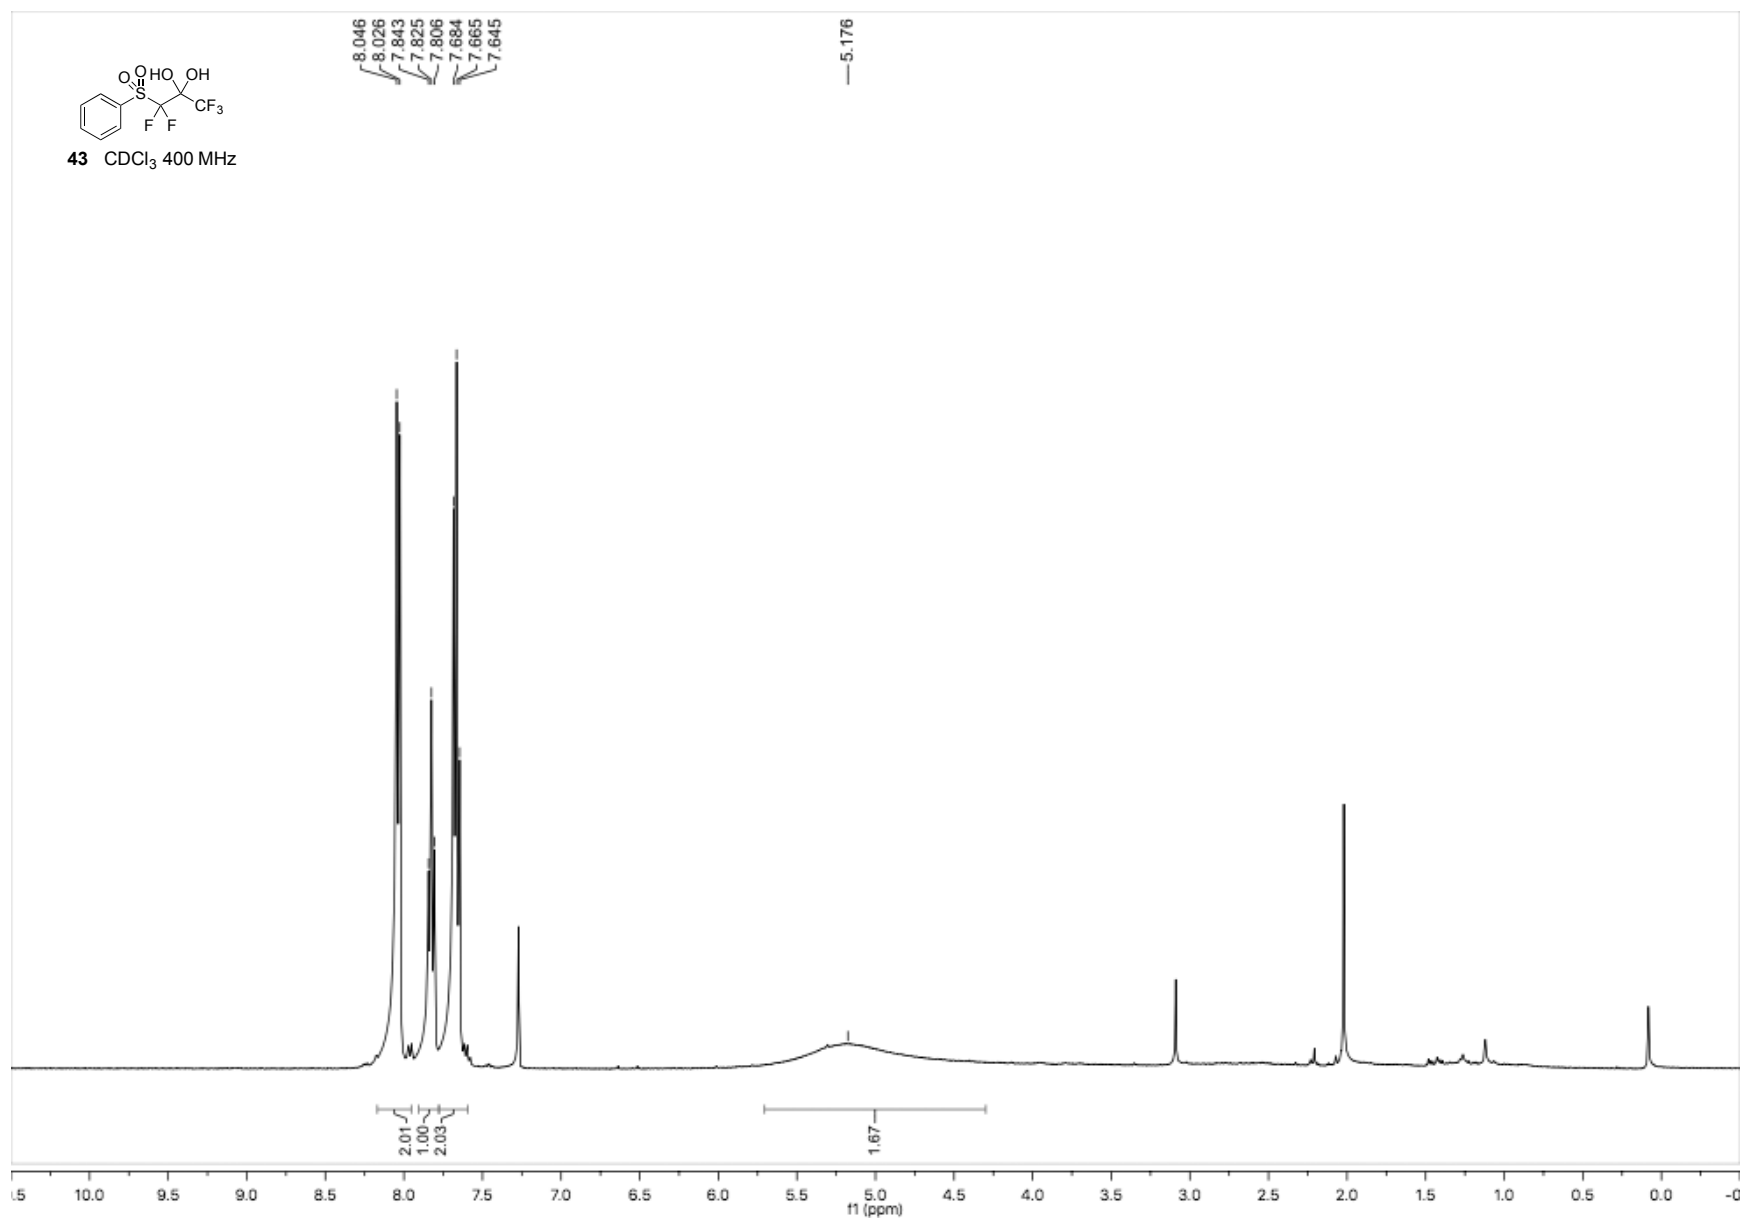

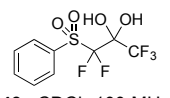

43 CDCl<sub>3</sub> 100 MHz

136.26  
132.34  
130.86  
129.52  
124.73  
121.84  
119.15  
118.96  
116.13  
113.11  
93.75  
93.67  
93.60  
93.51  
93.42  
93.34  
93.17  
93.09  
93.01  
92.92  
92.84  
92.75

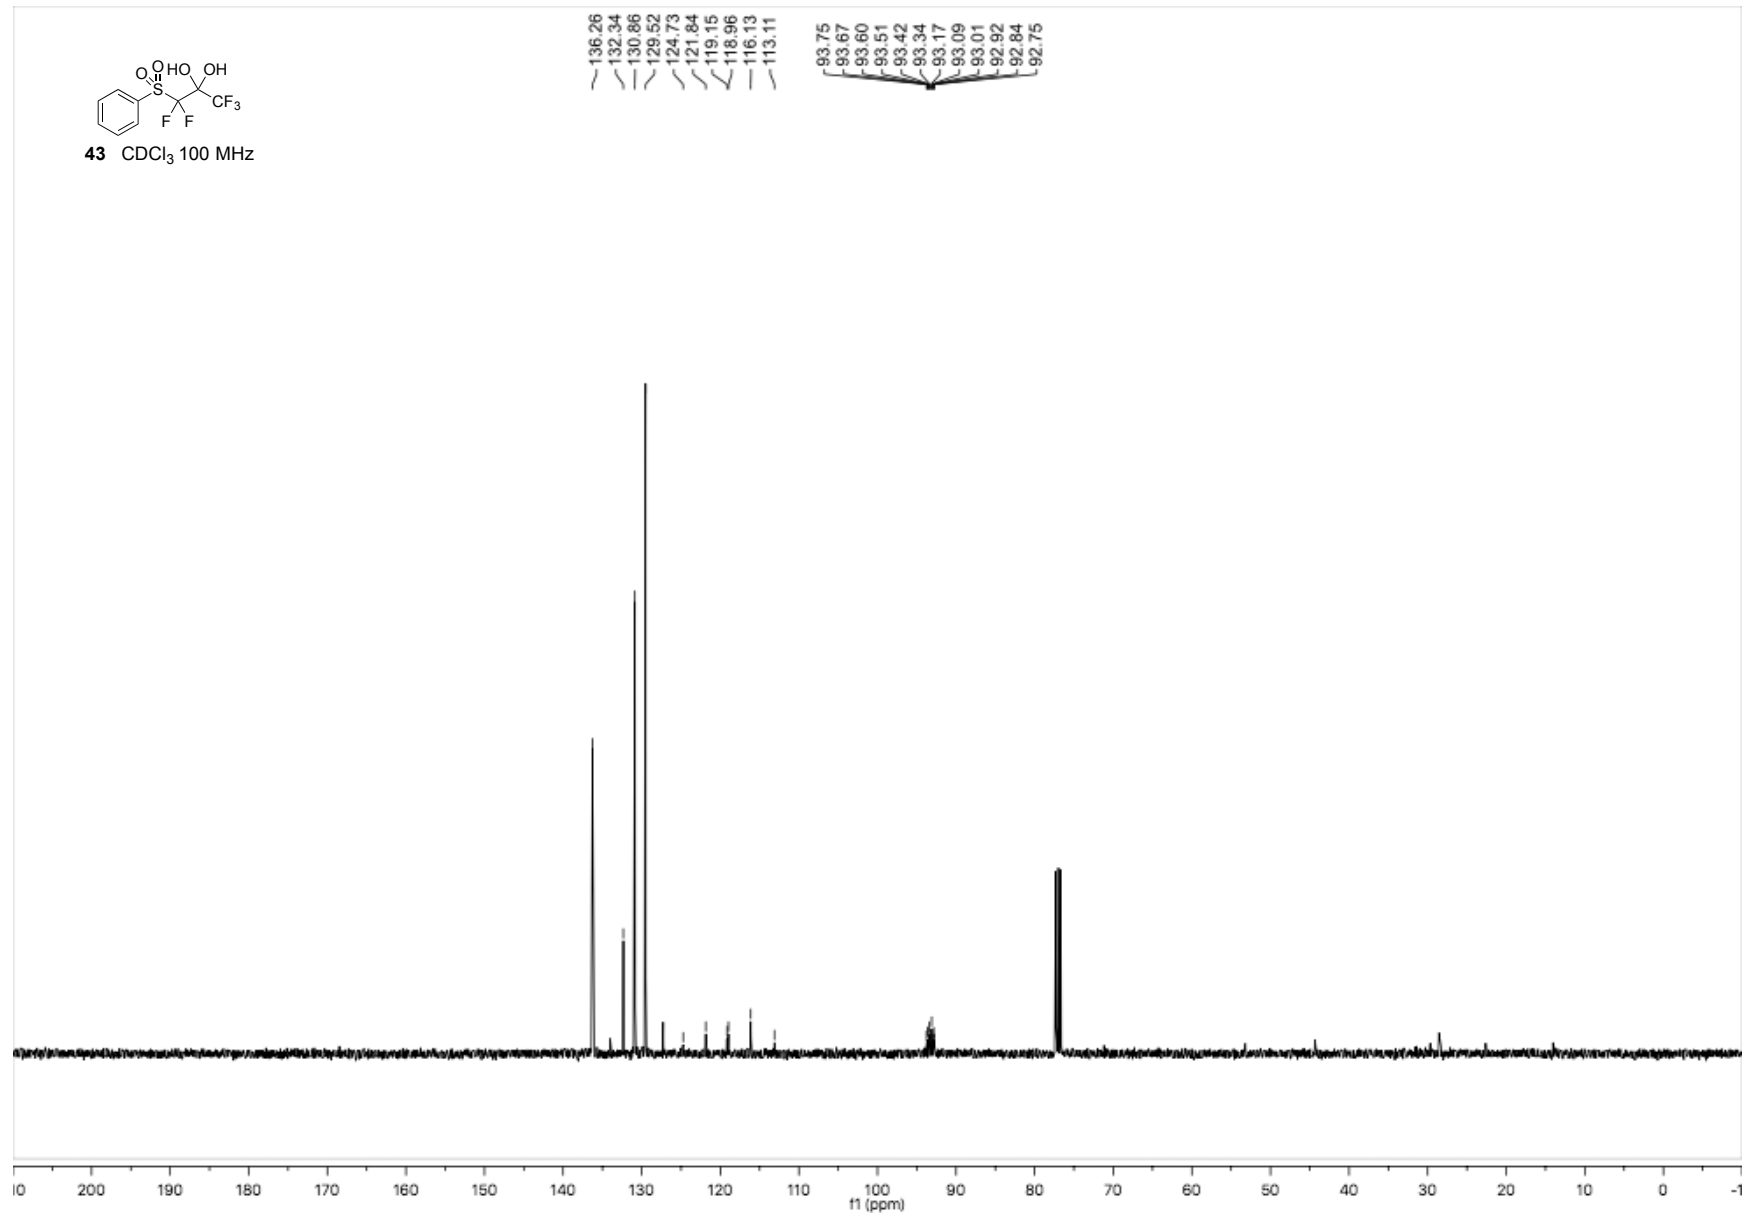

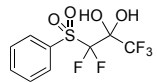

43 CDCl<sub>3</sub> 564 MHz

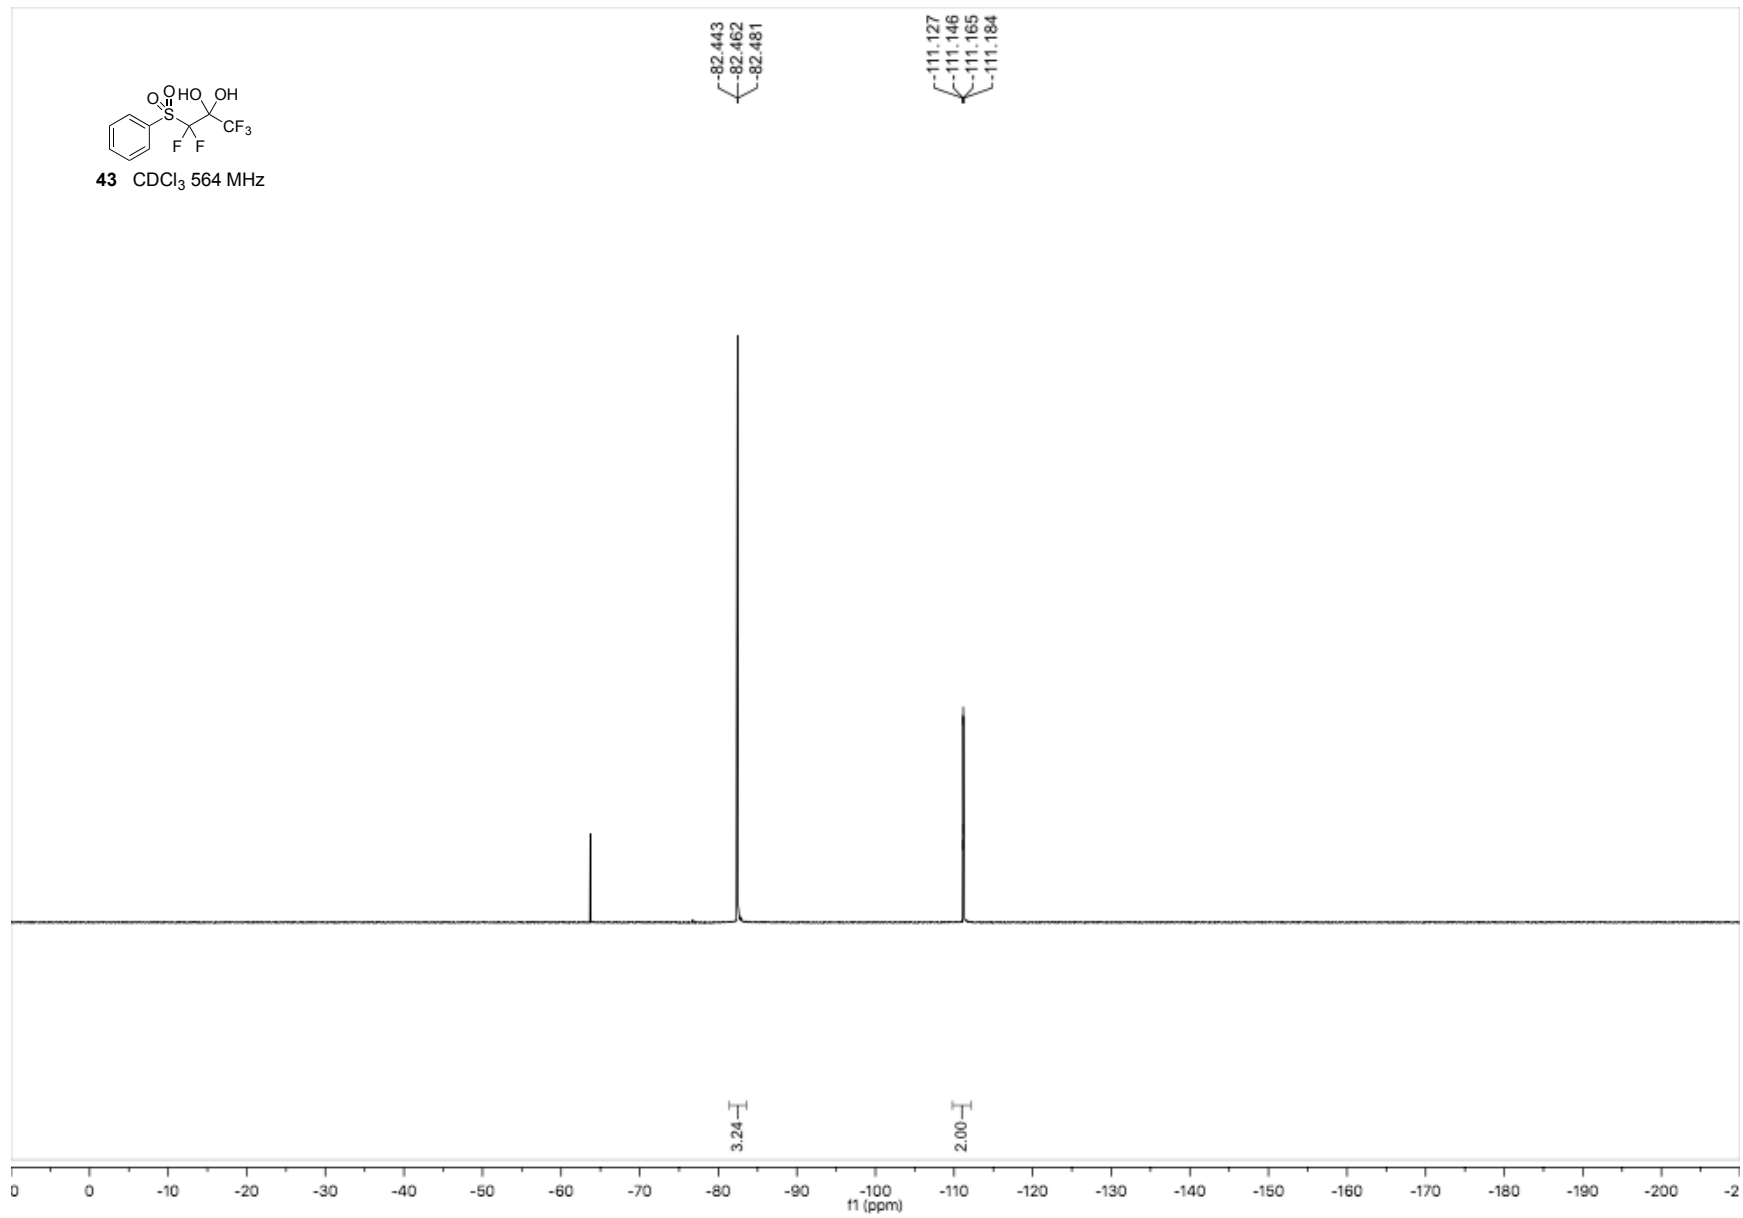



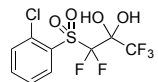

44 CDCl<sub>3</sub> 400 MHz

8.163  
8.143  
7.731  
7.711  
7.689  
7.653  
7.633  
7.571  
7.551  
7.532

4.156

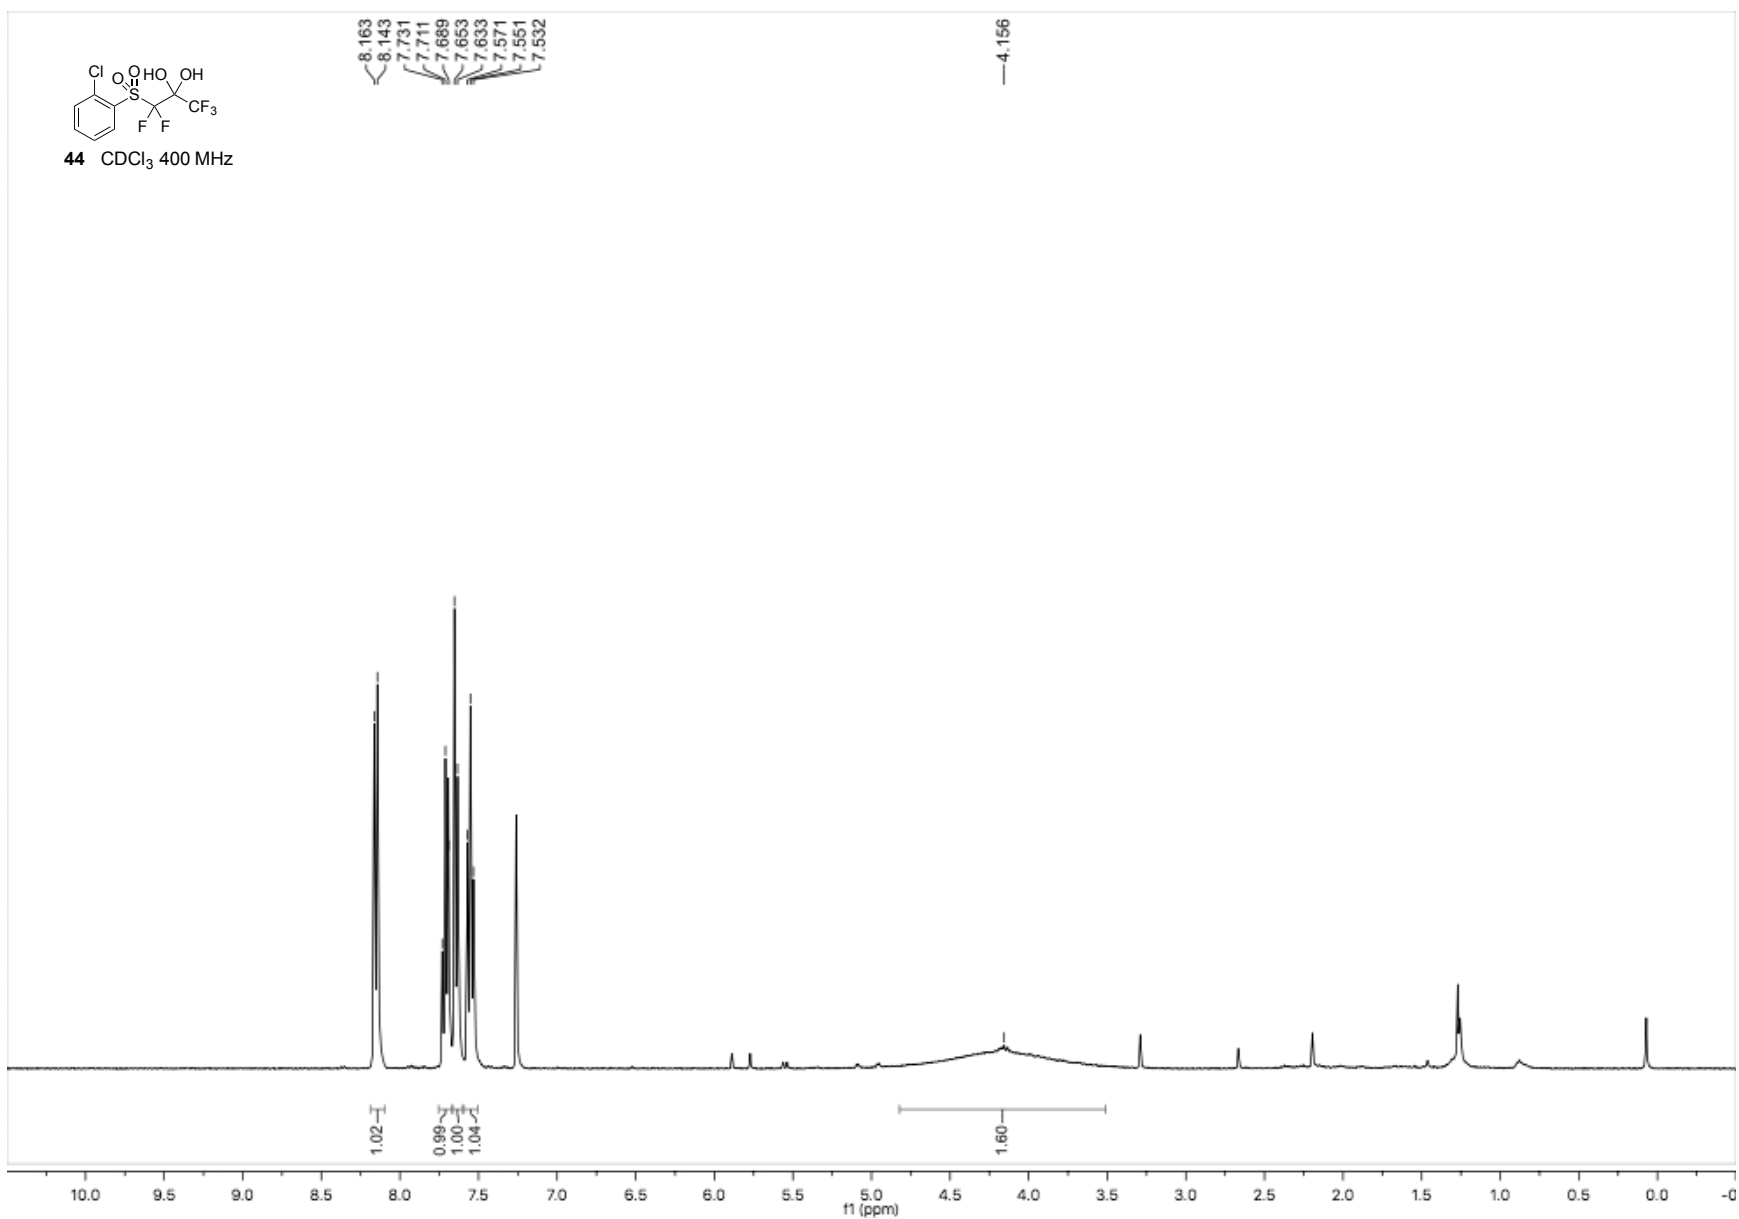

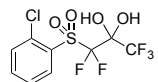

44 CDCl<sub>3</sub> 100 MHz

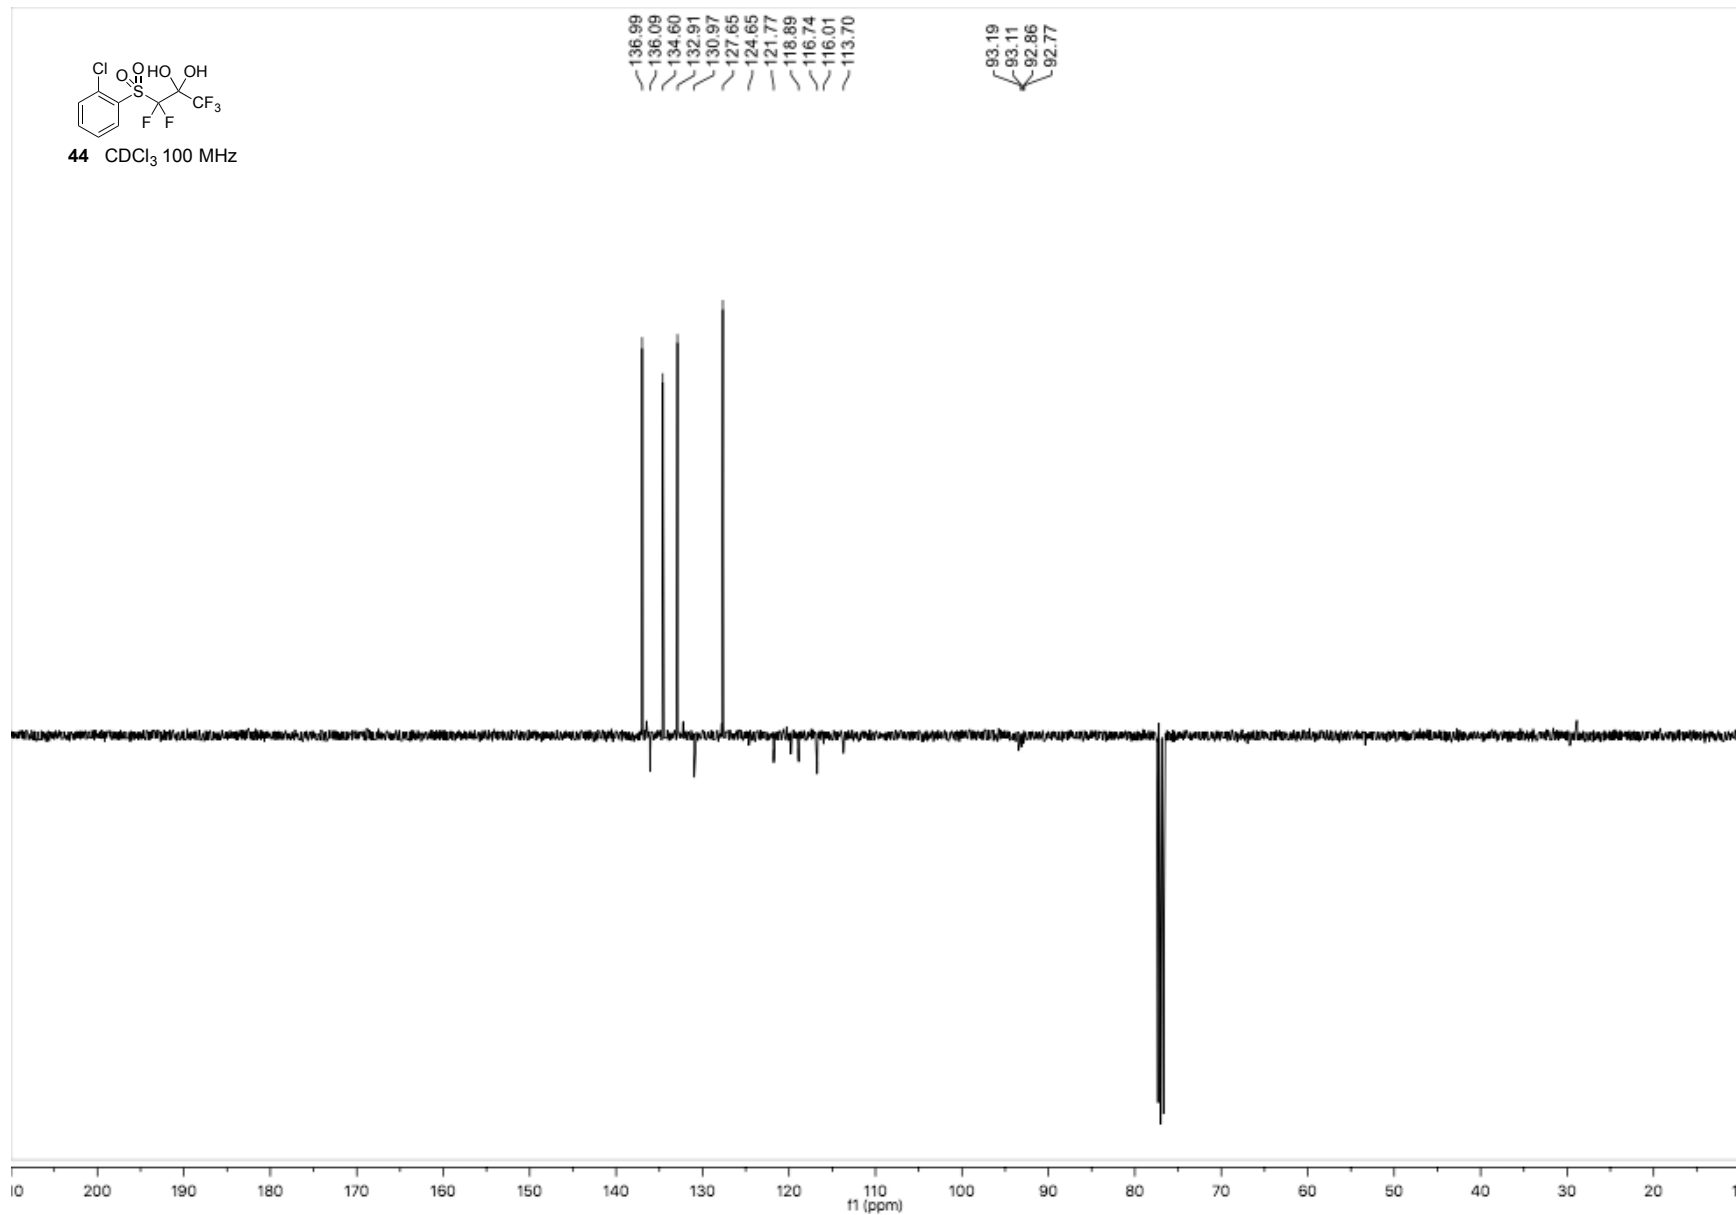

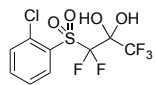

44 CDCl<sub>3</sub> 376 MHz

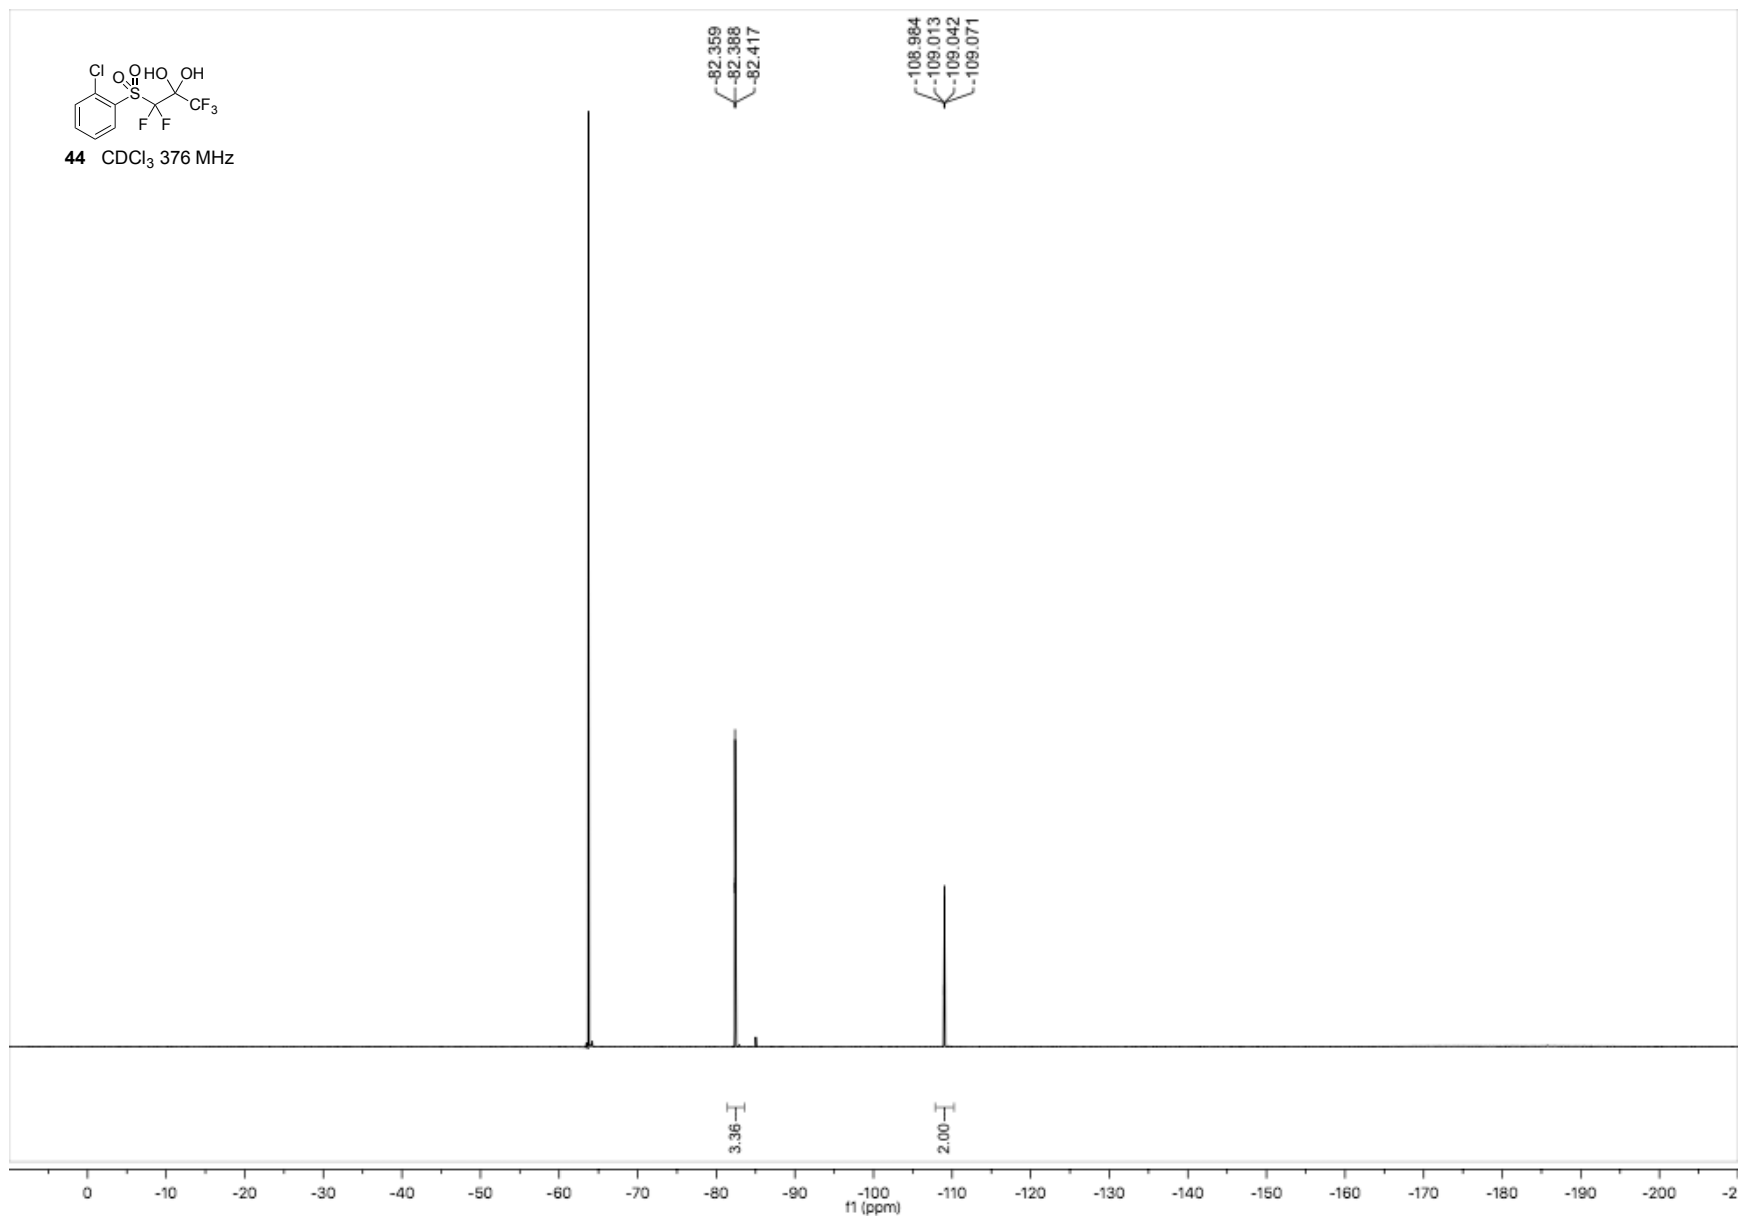

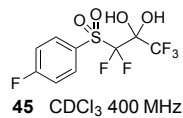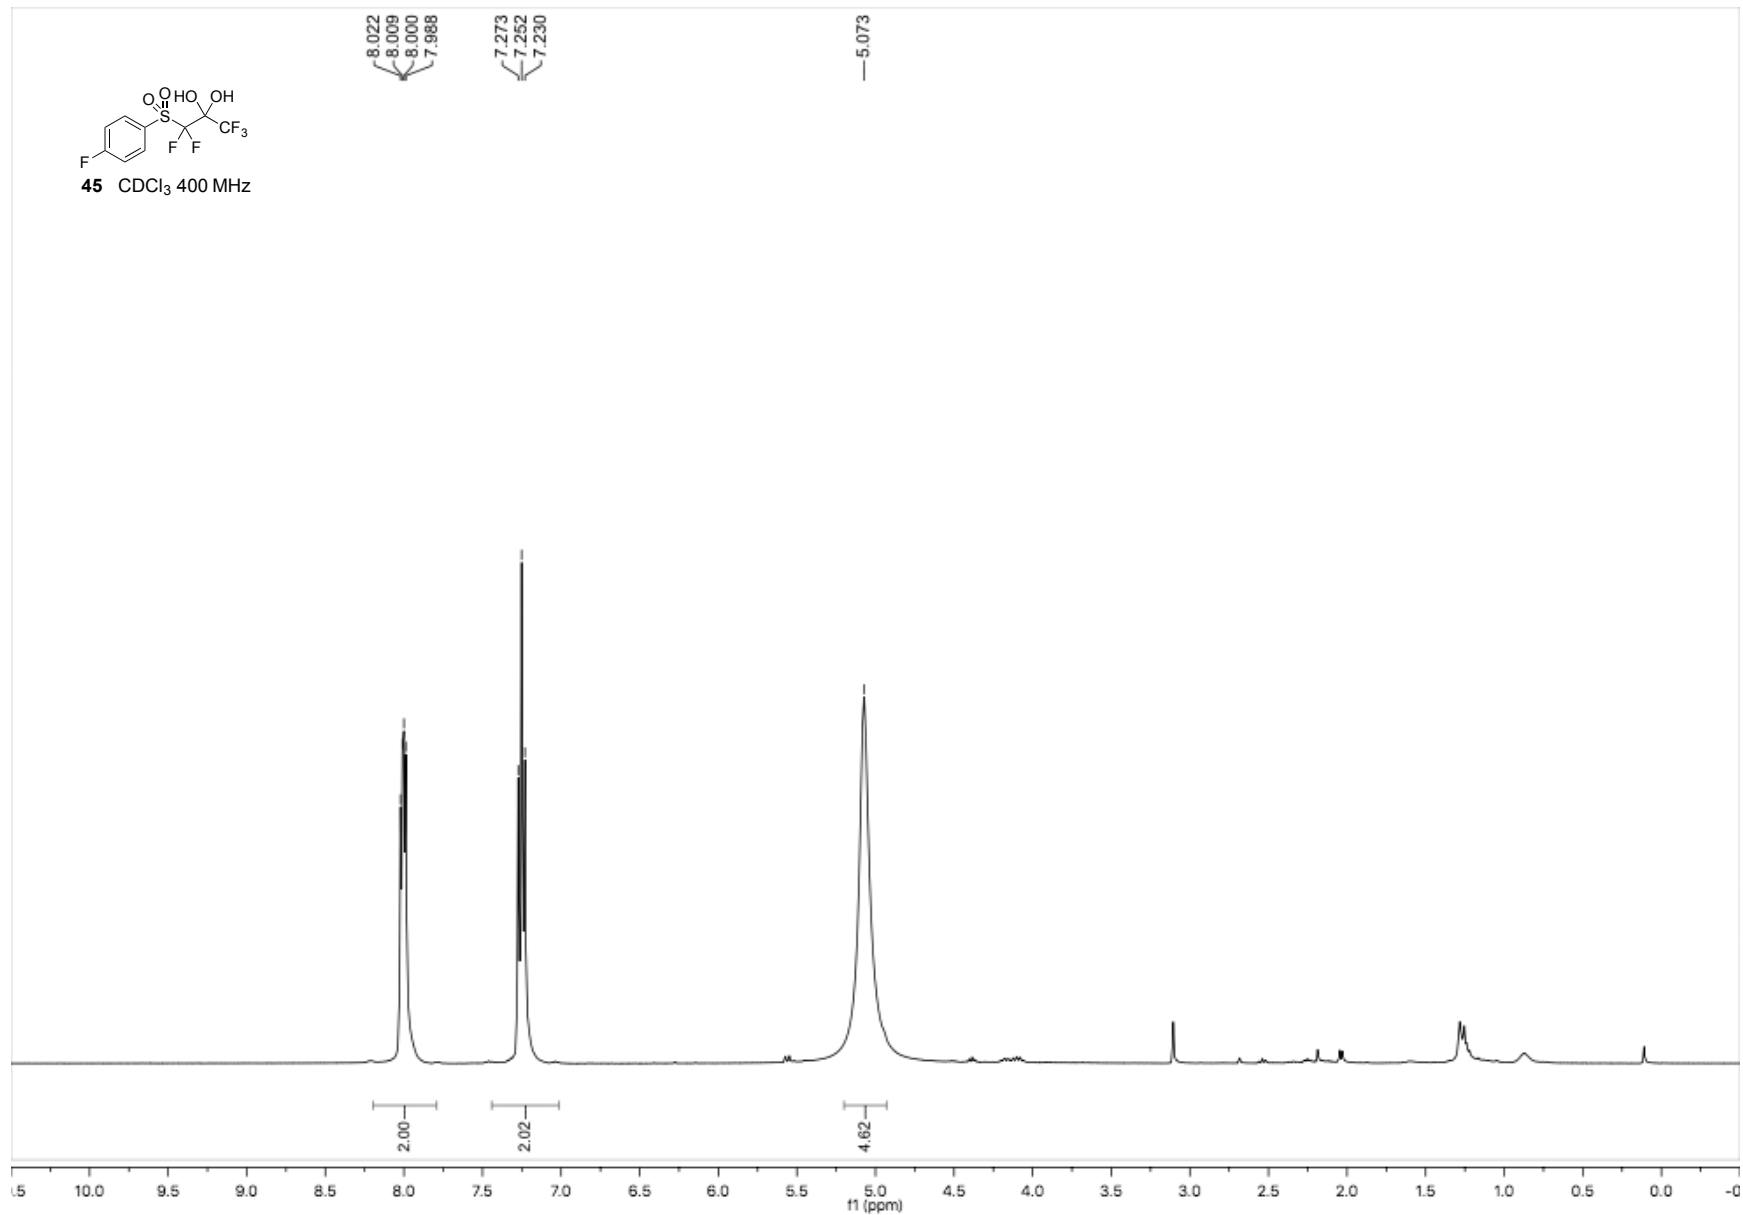

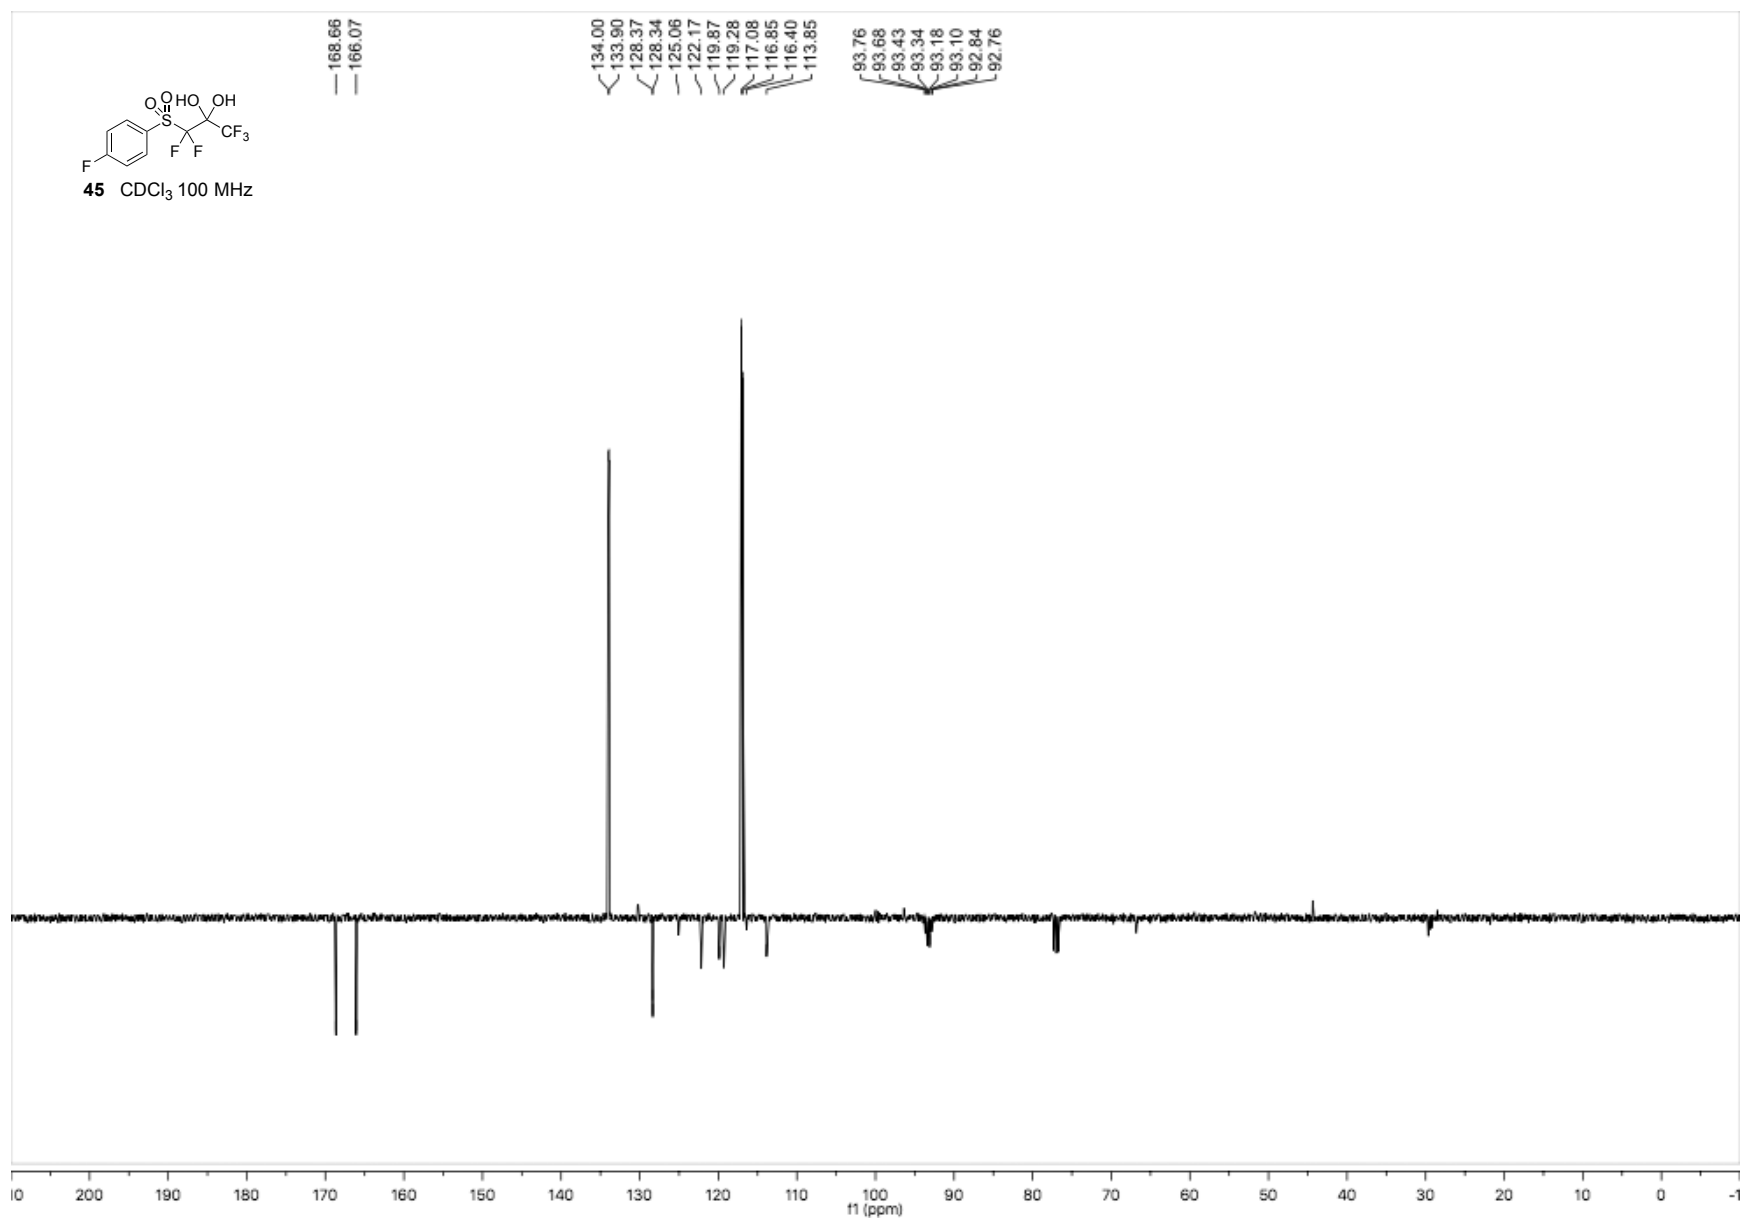

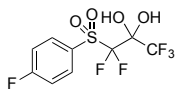

45 CDCl<sub>3</sub> 376 MHz

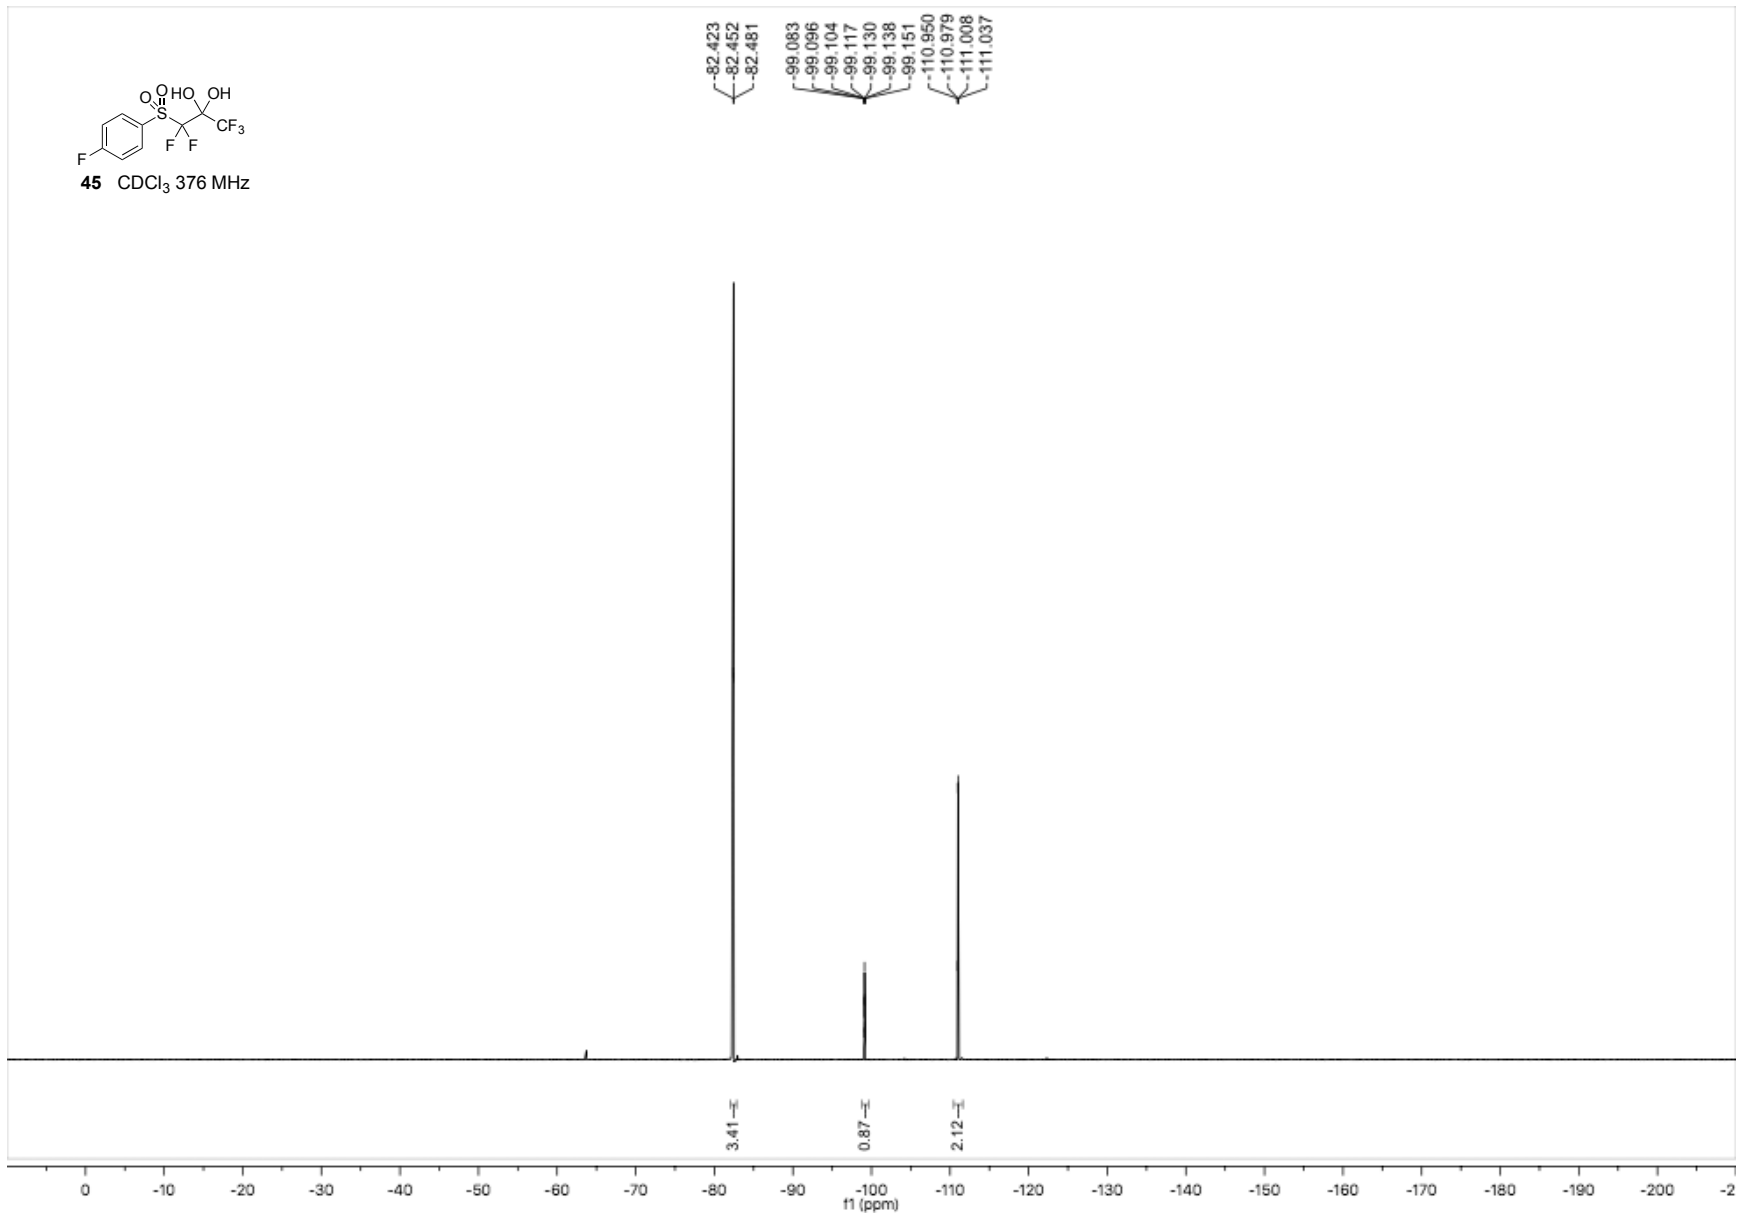

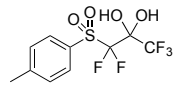

46 CDCl<sub>3</sub> 400 MHz

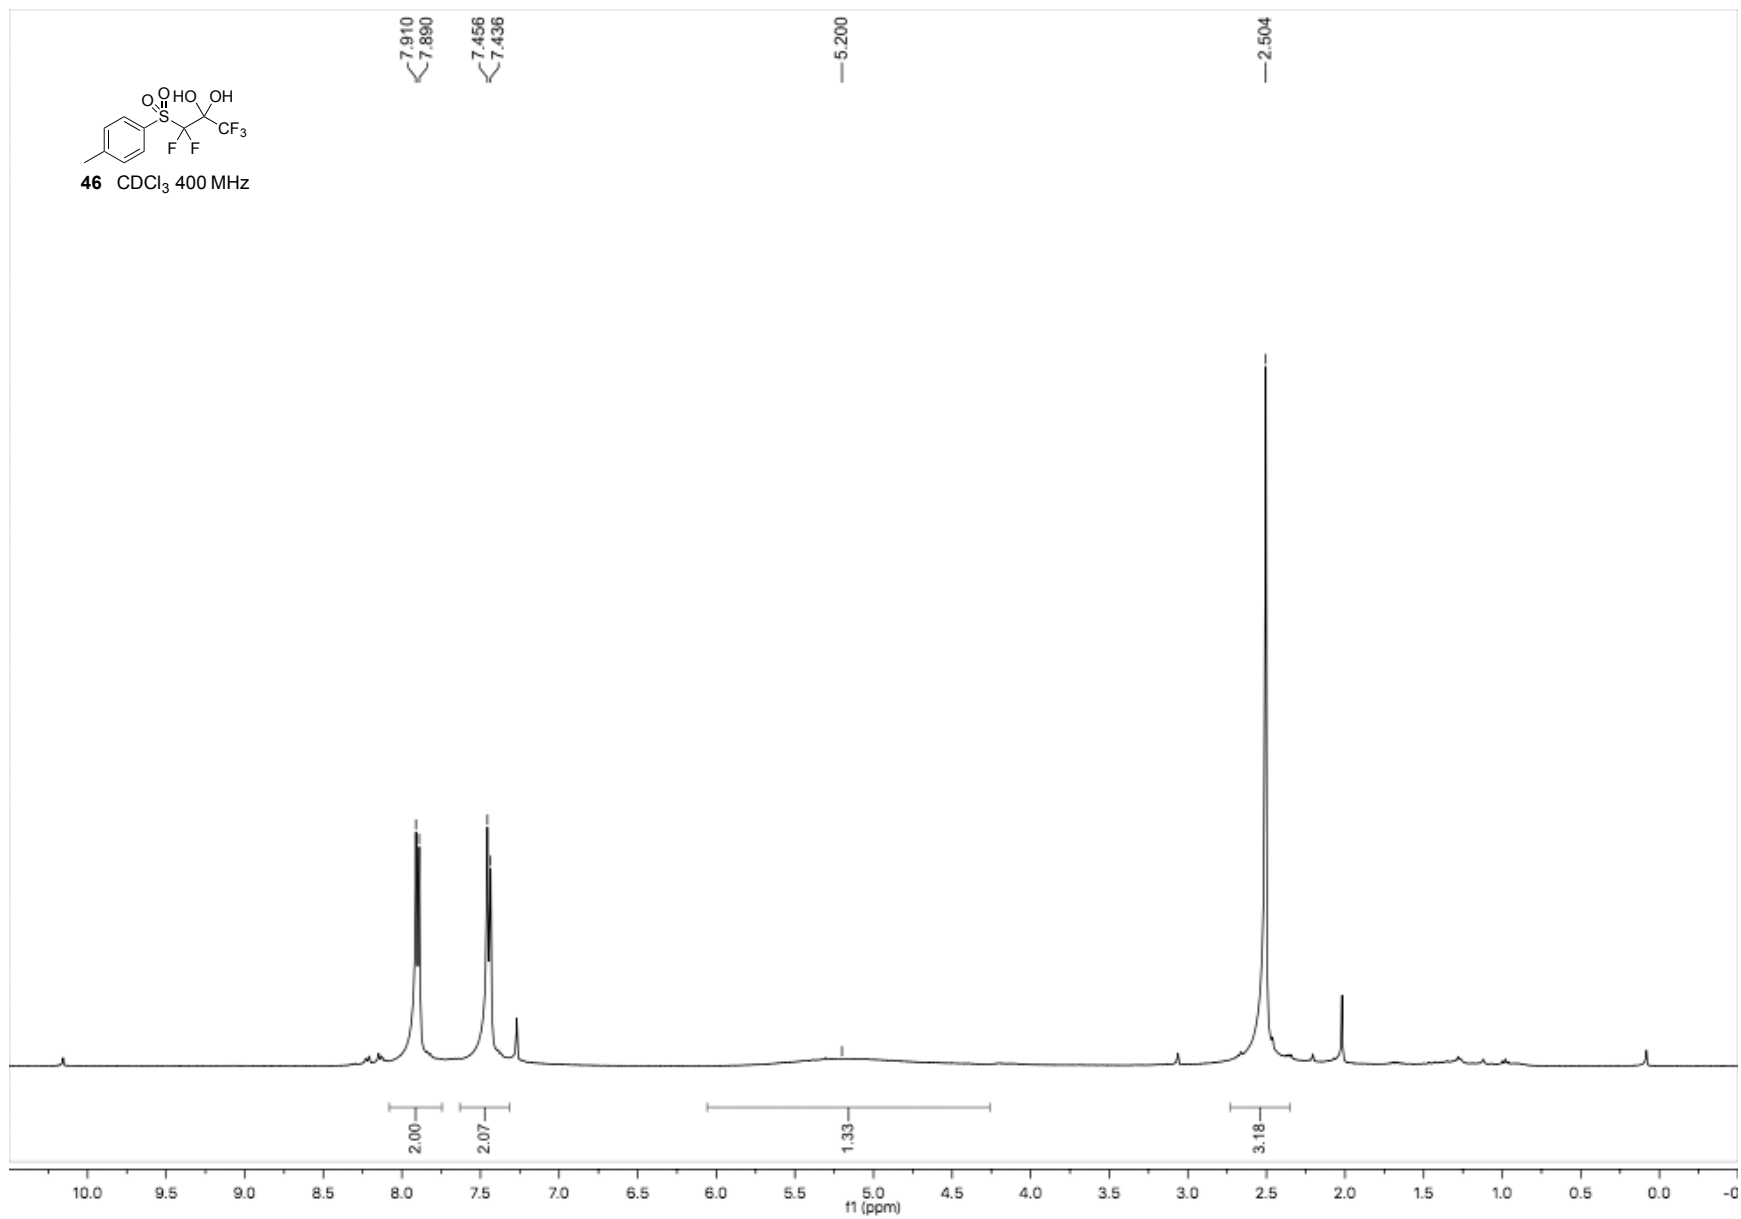

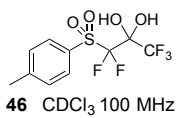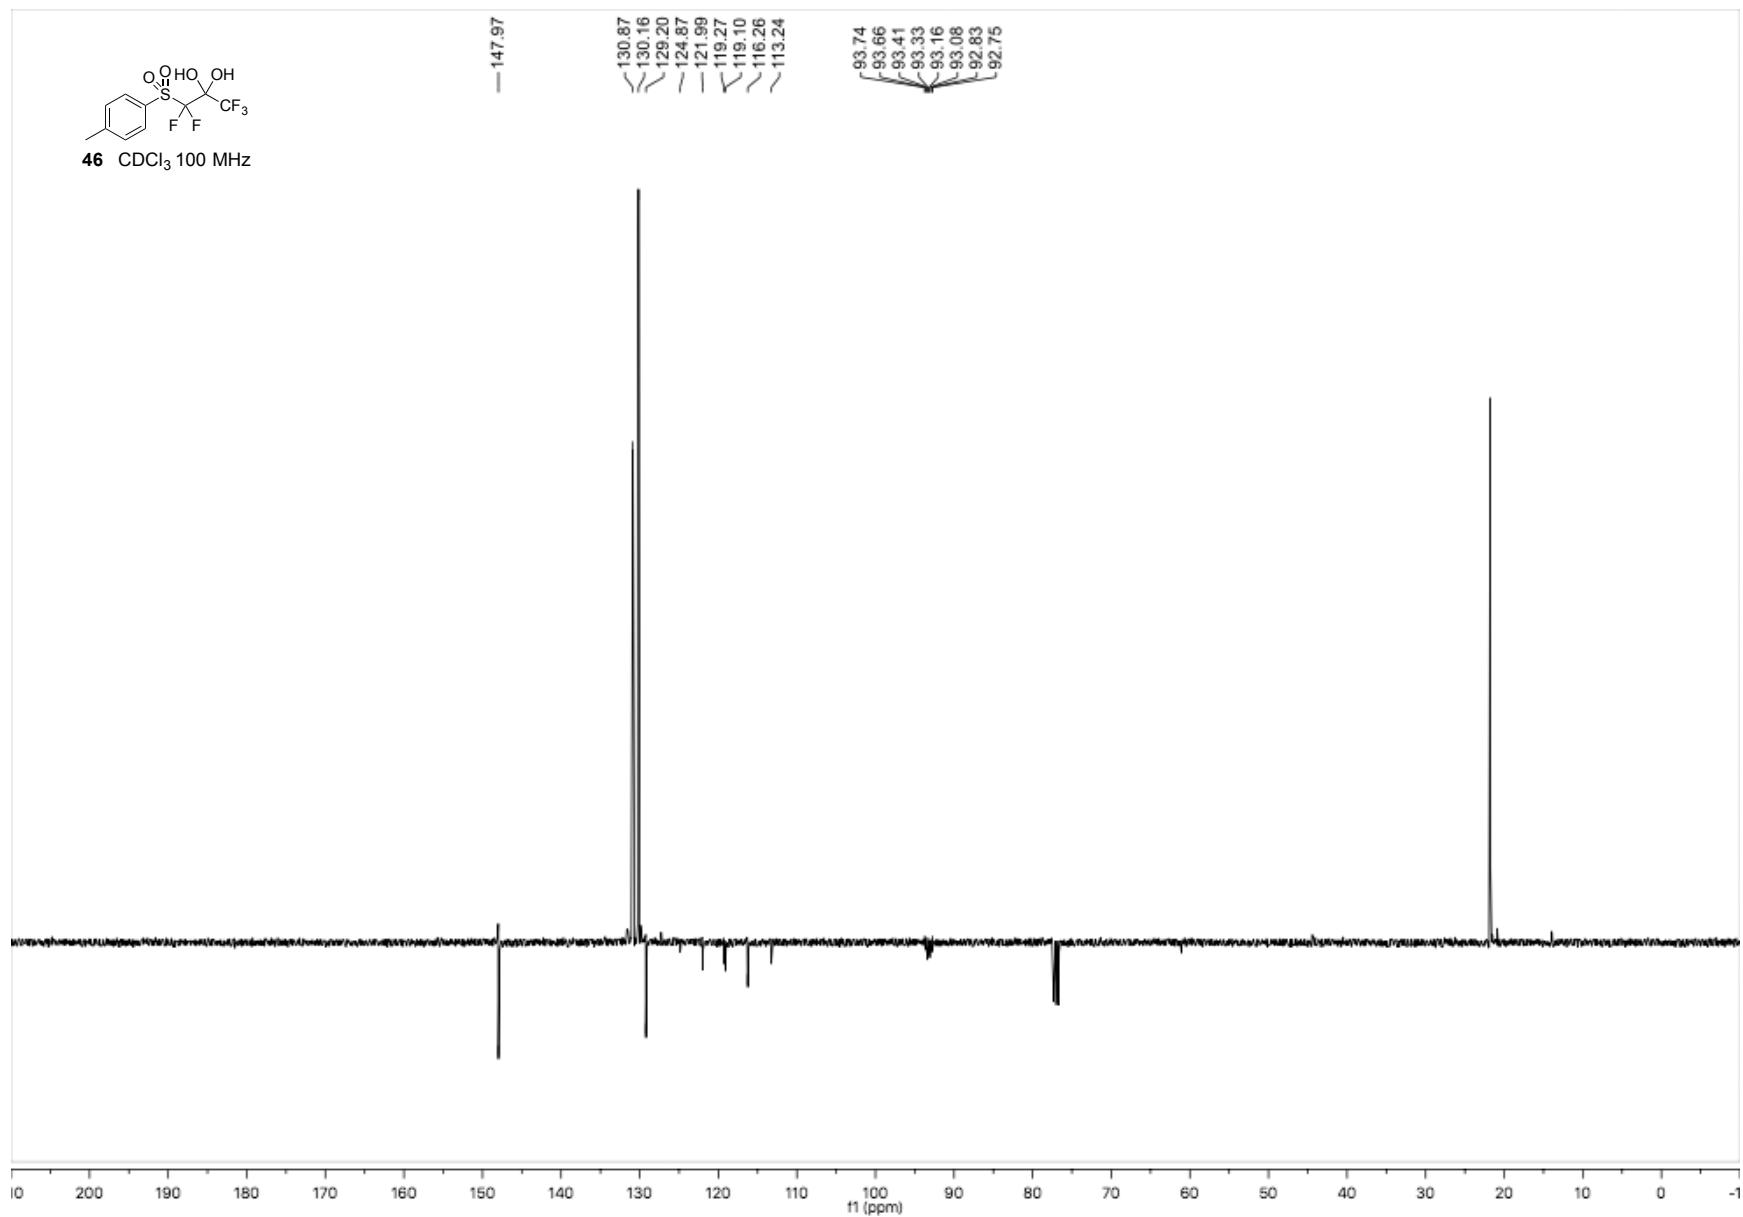



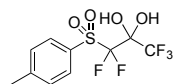

46 CDCl<sub>3</sub> 564 MHz

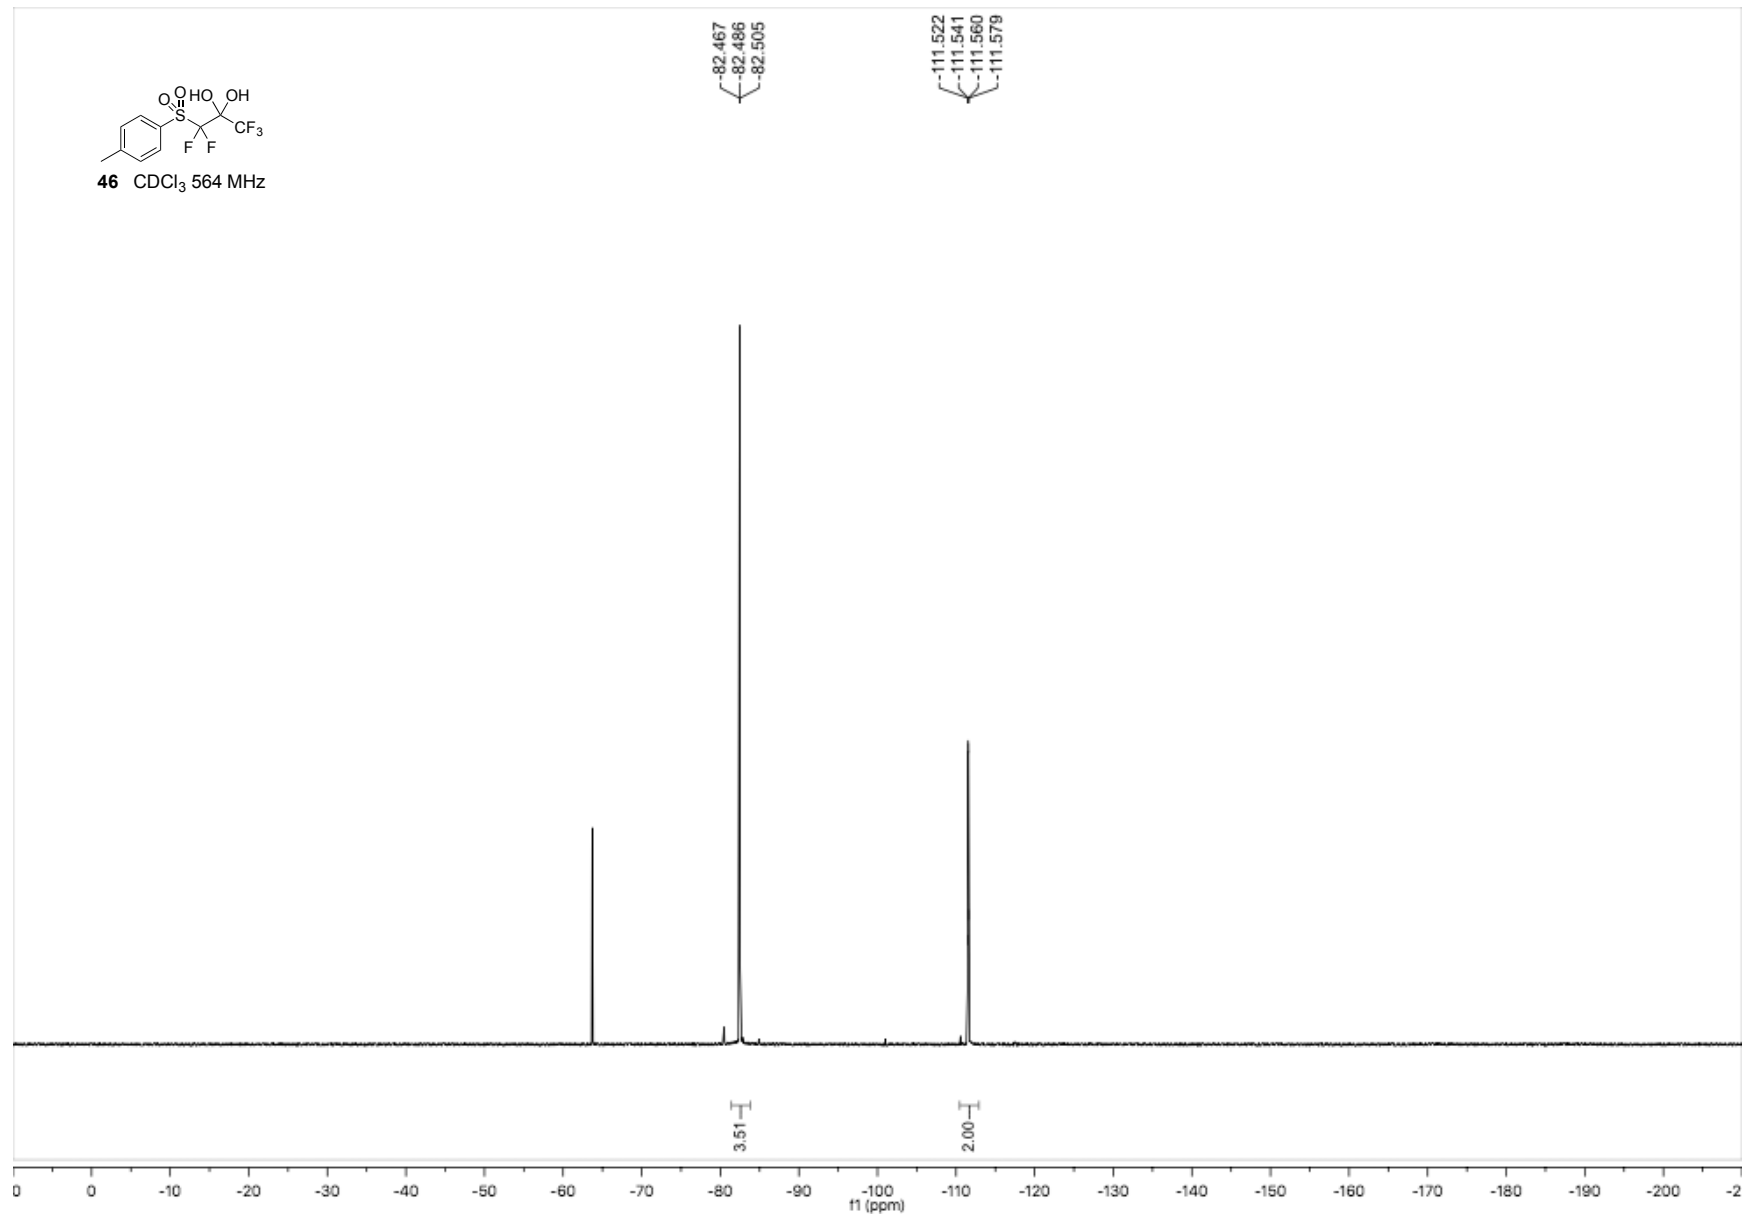

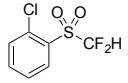

48 CDCl<sub>3</sub> 400 MHz

8.185  
8.181  
8.165  
8.161  
7.720  
7.701  
7.685  
7.682  
7.636  
7.616  
7.574  
7.555  
7.536  
6.663  
6.529  
6.394

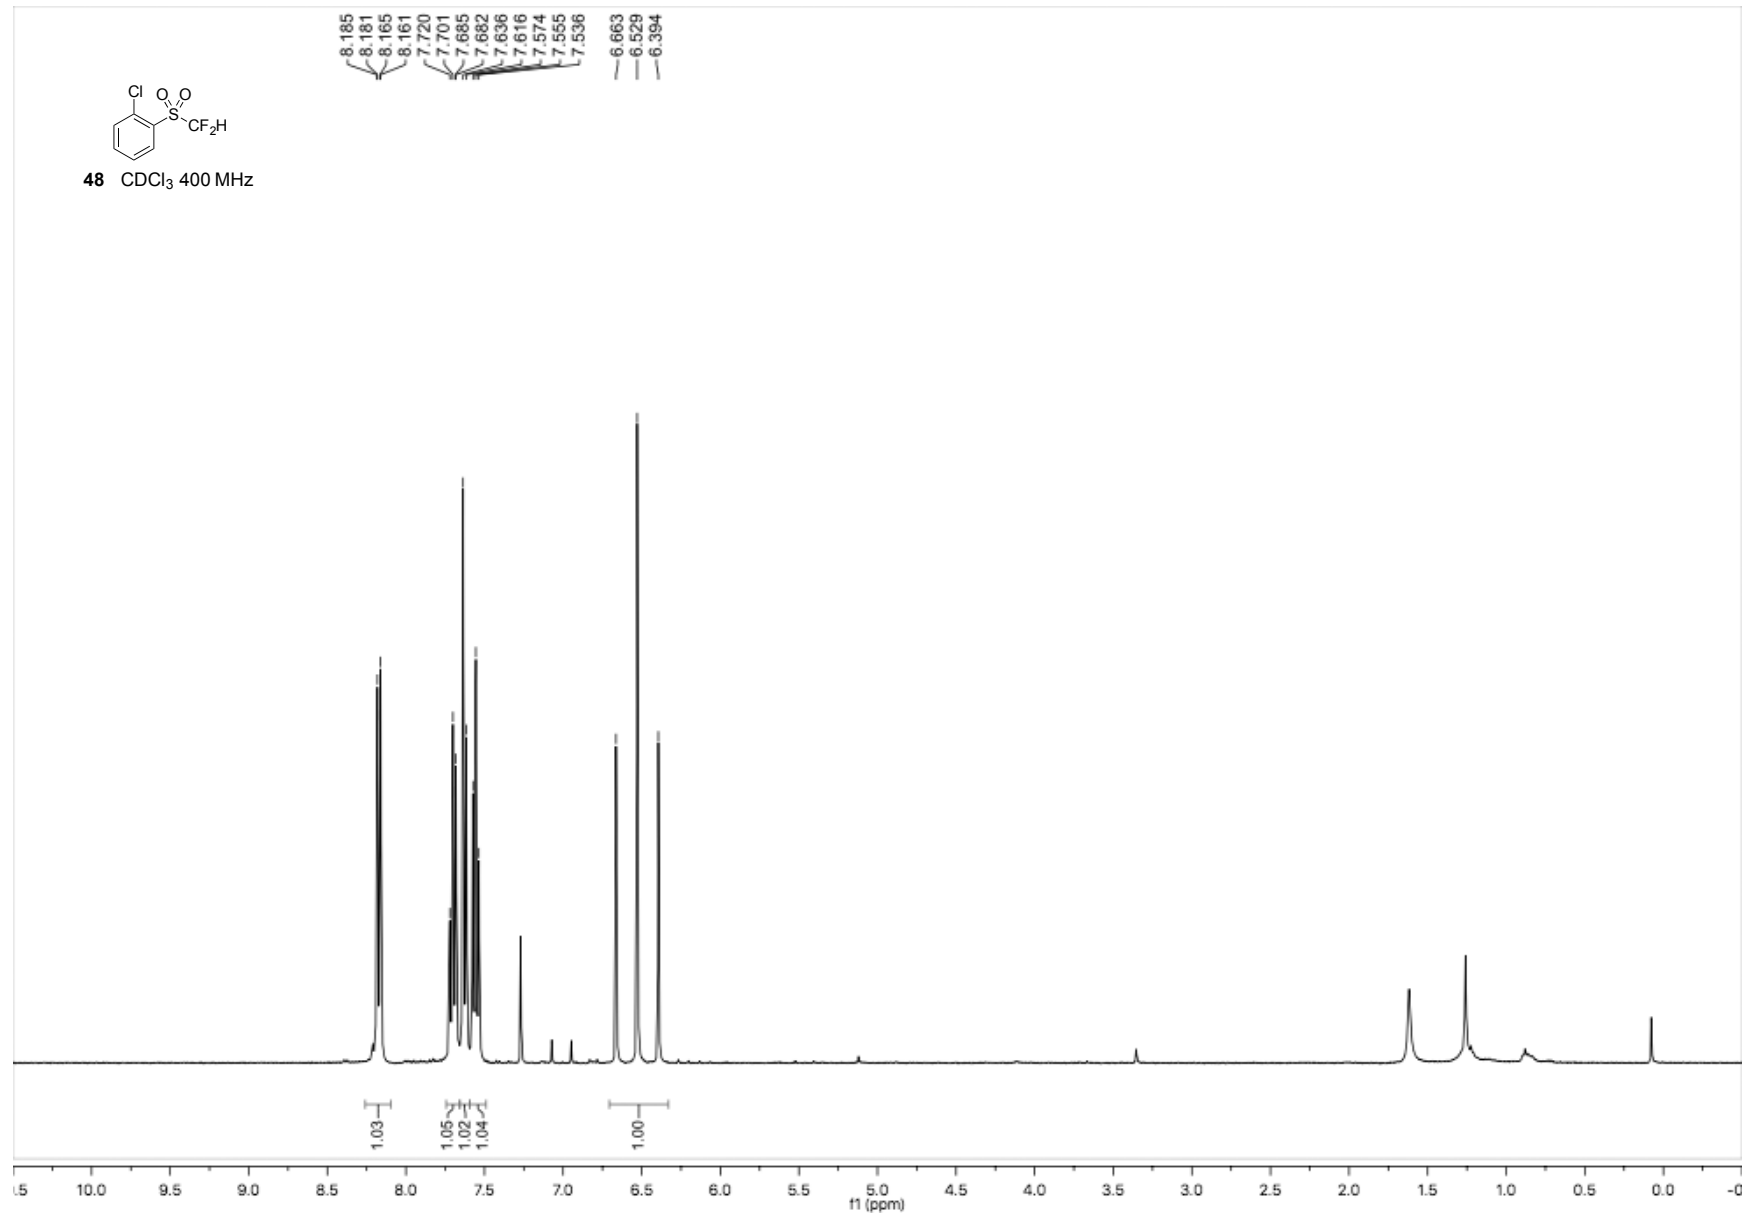

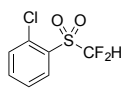

48 CDCl<sub>3</sub> 100 MHz

136.60  
134.32  
133.87  
132.36  
131.38  
127.80  
117.16  
114.31  
111.46

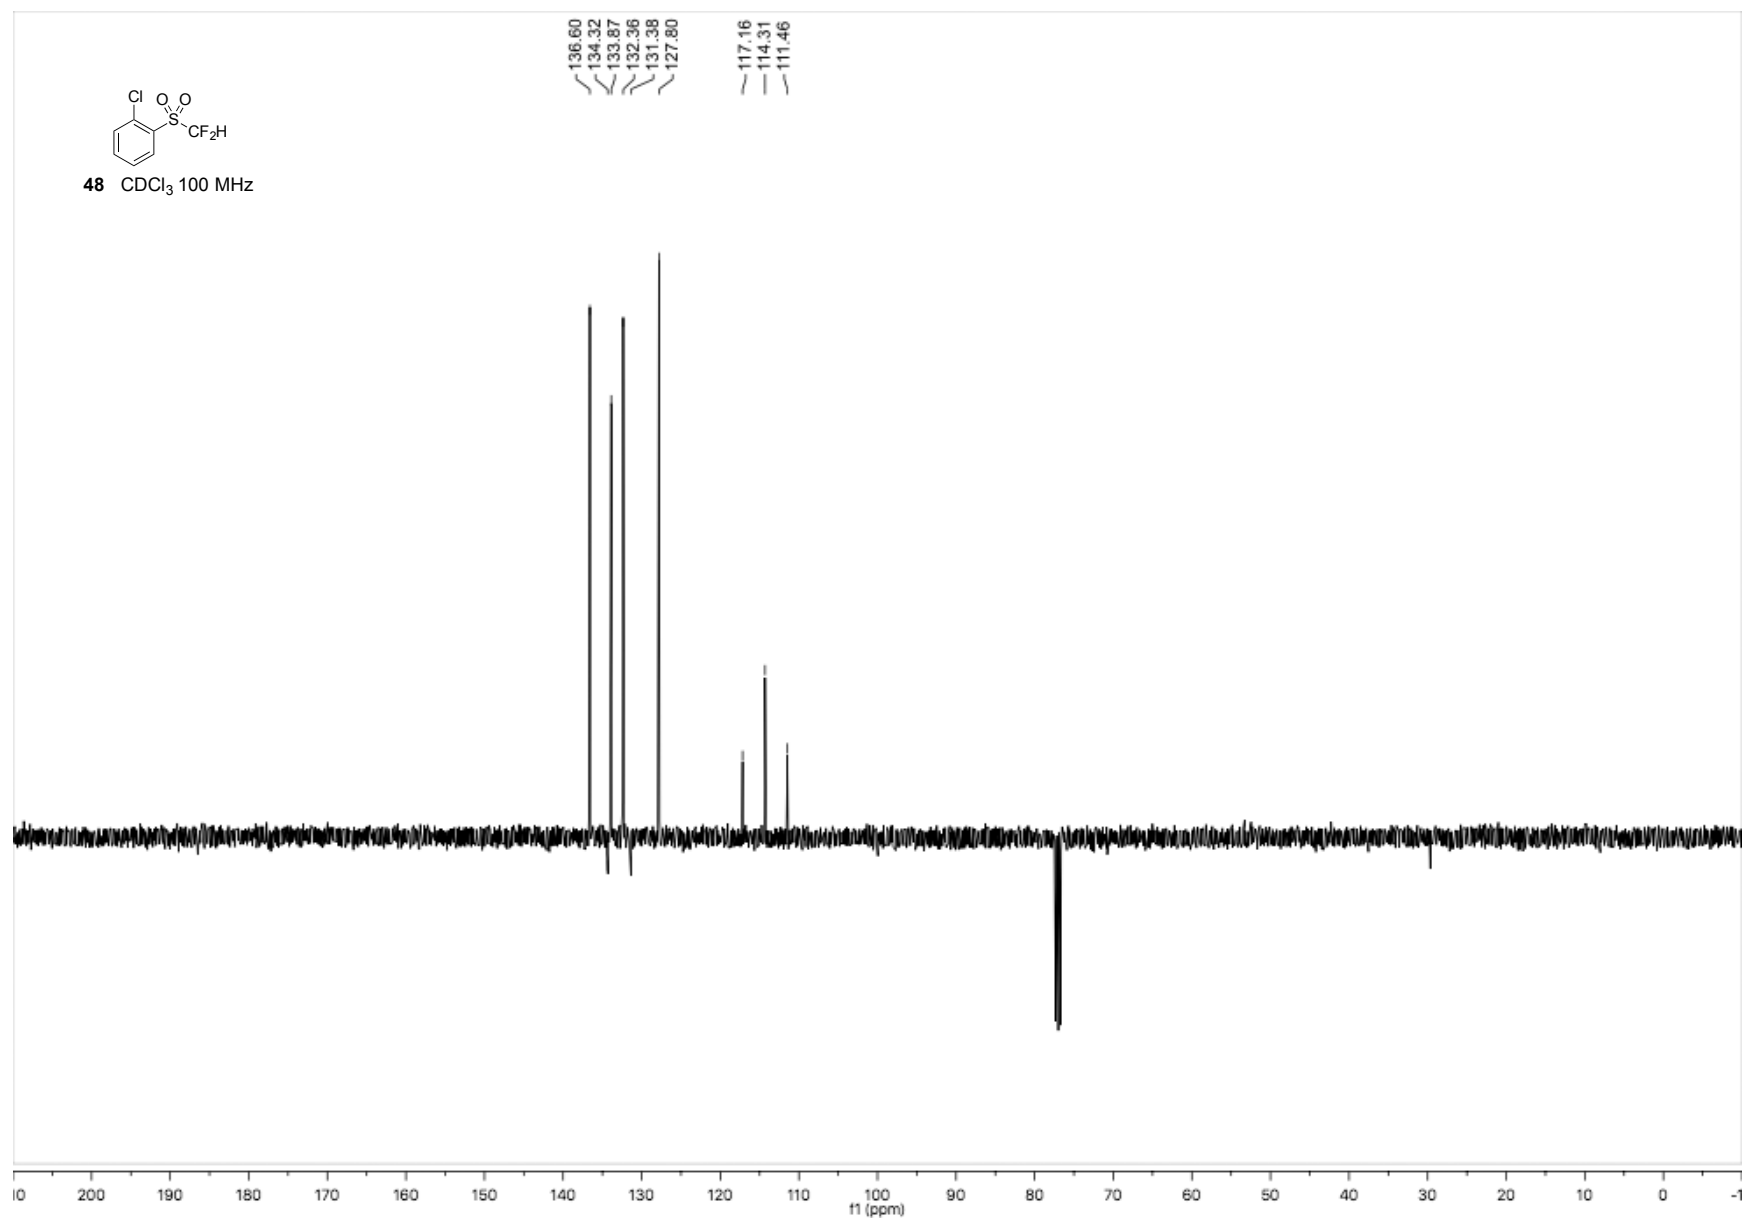

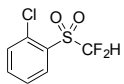

48 CDCl<sub>3</sub> 376 MHz

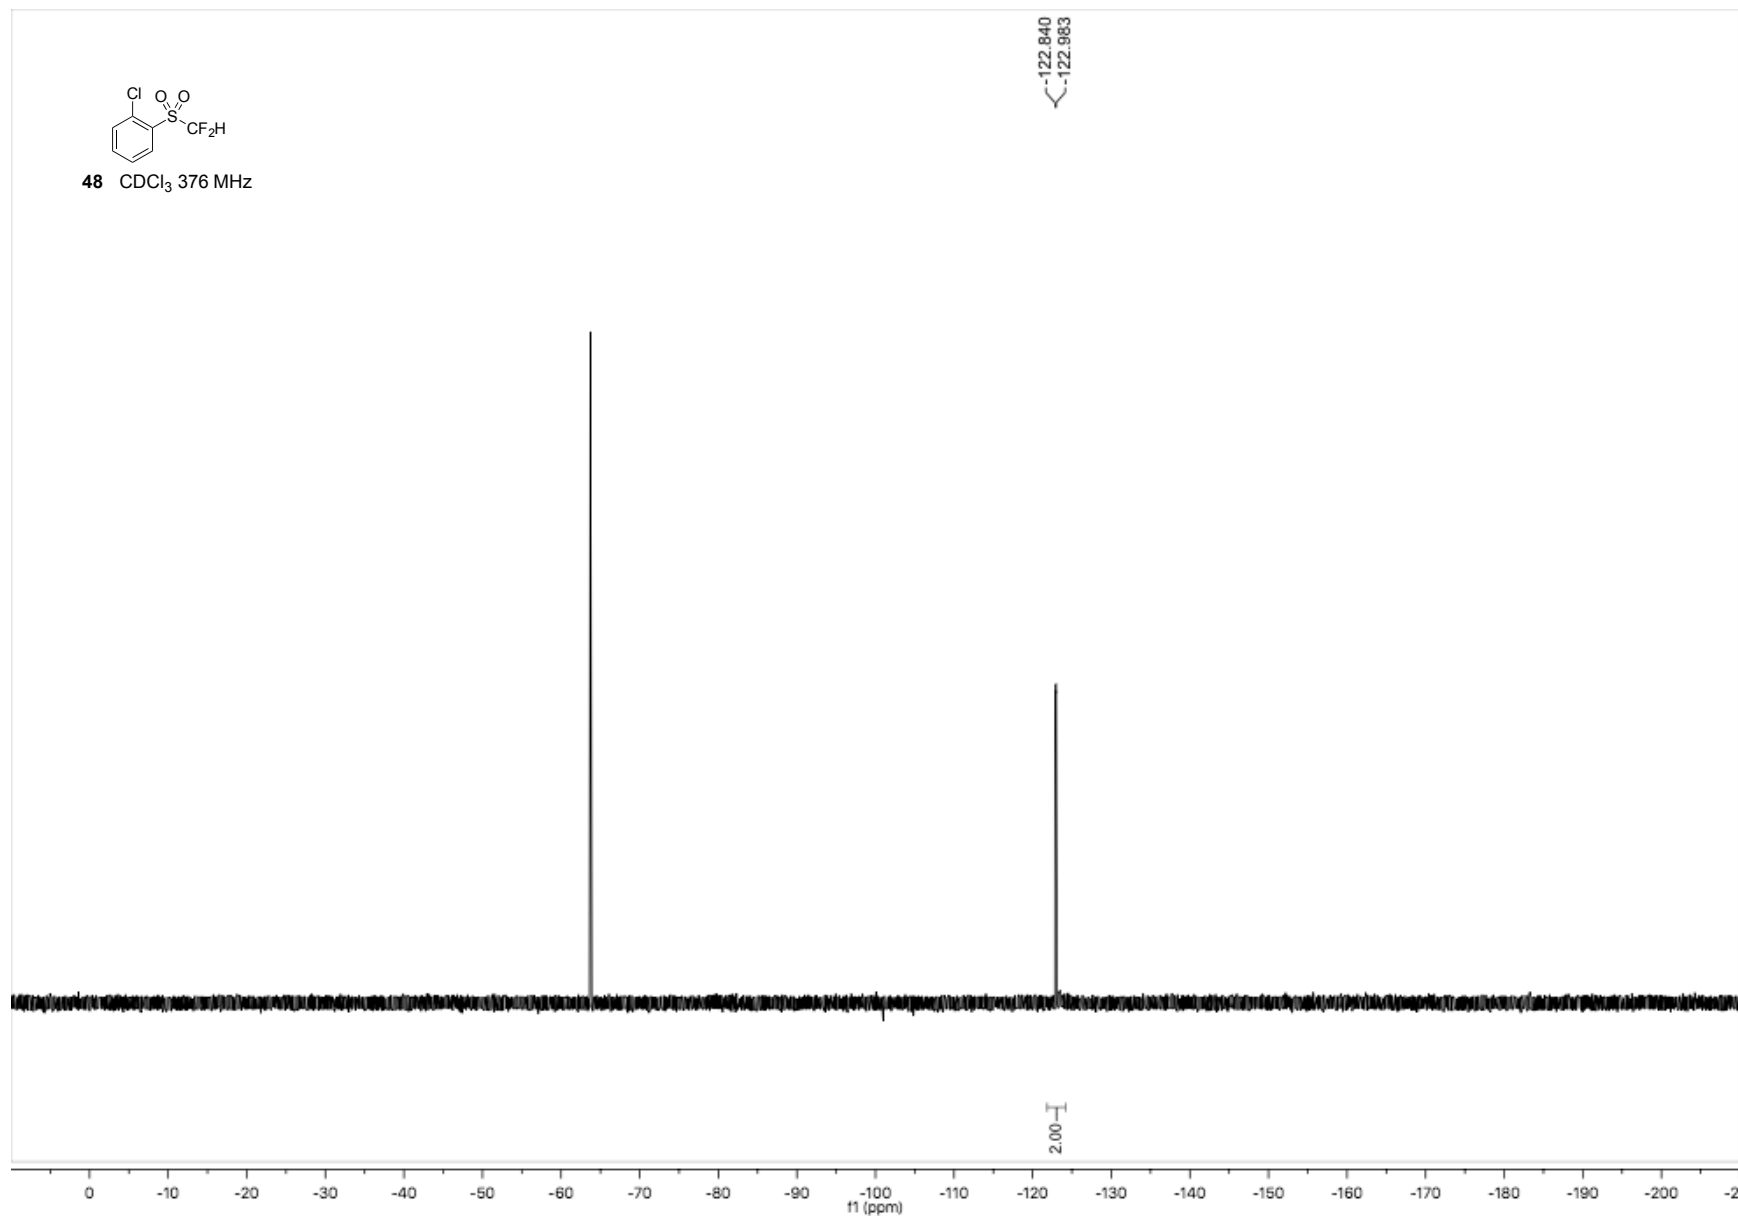

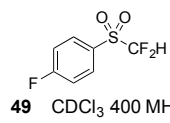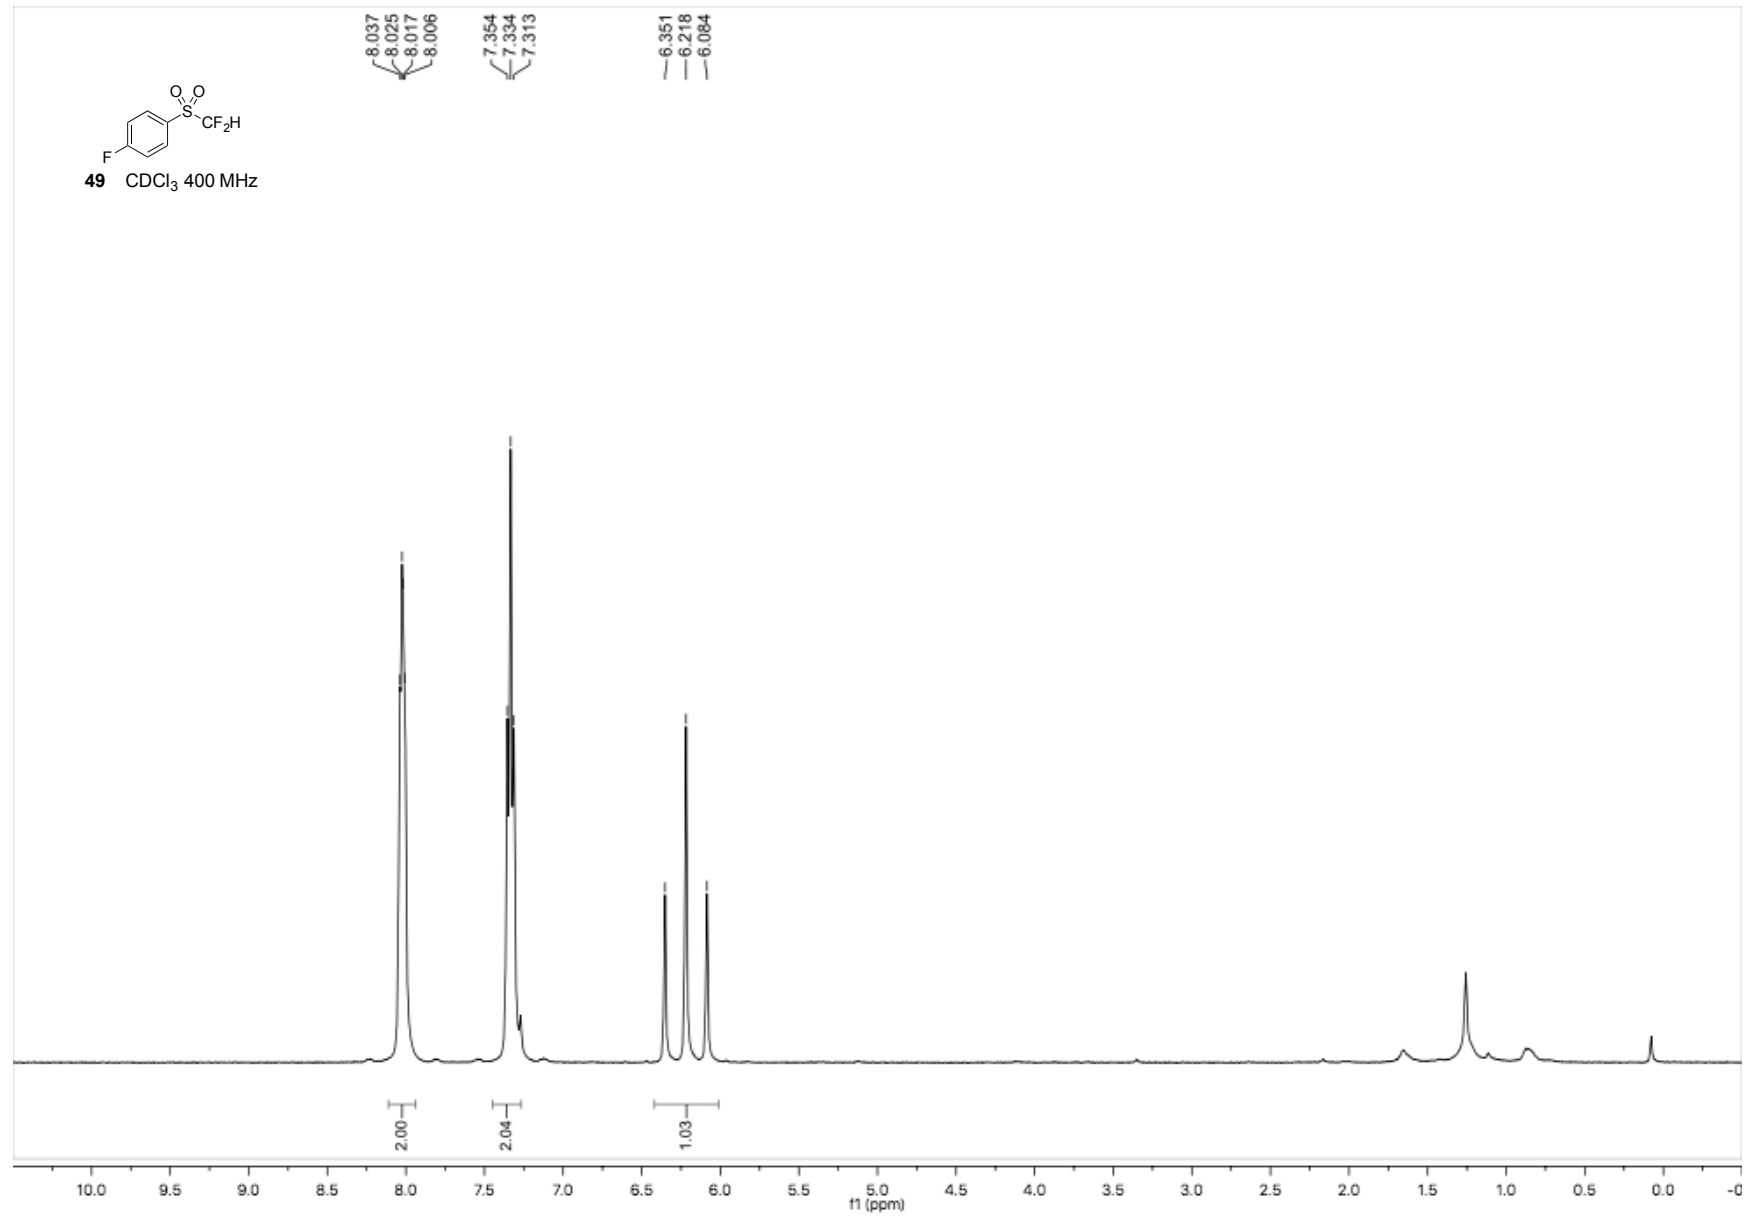

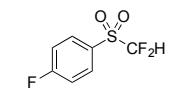

49 CDCl<sub>3</sub> 100 MHz

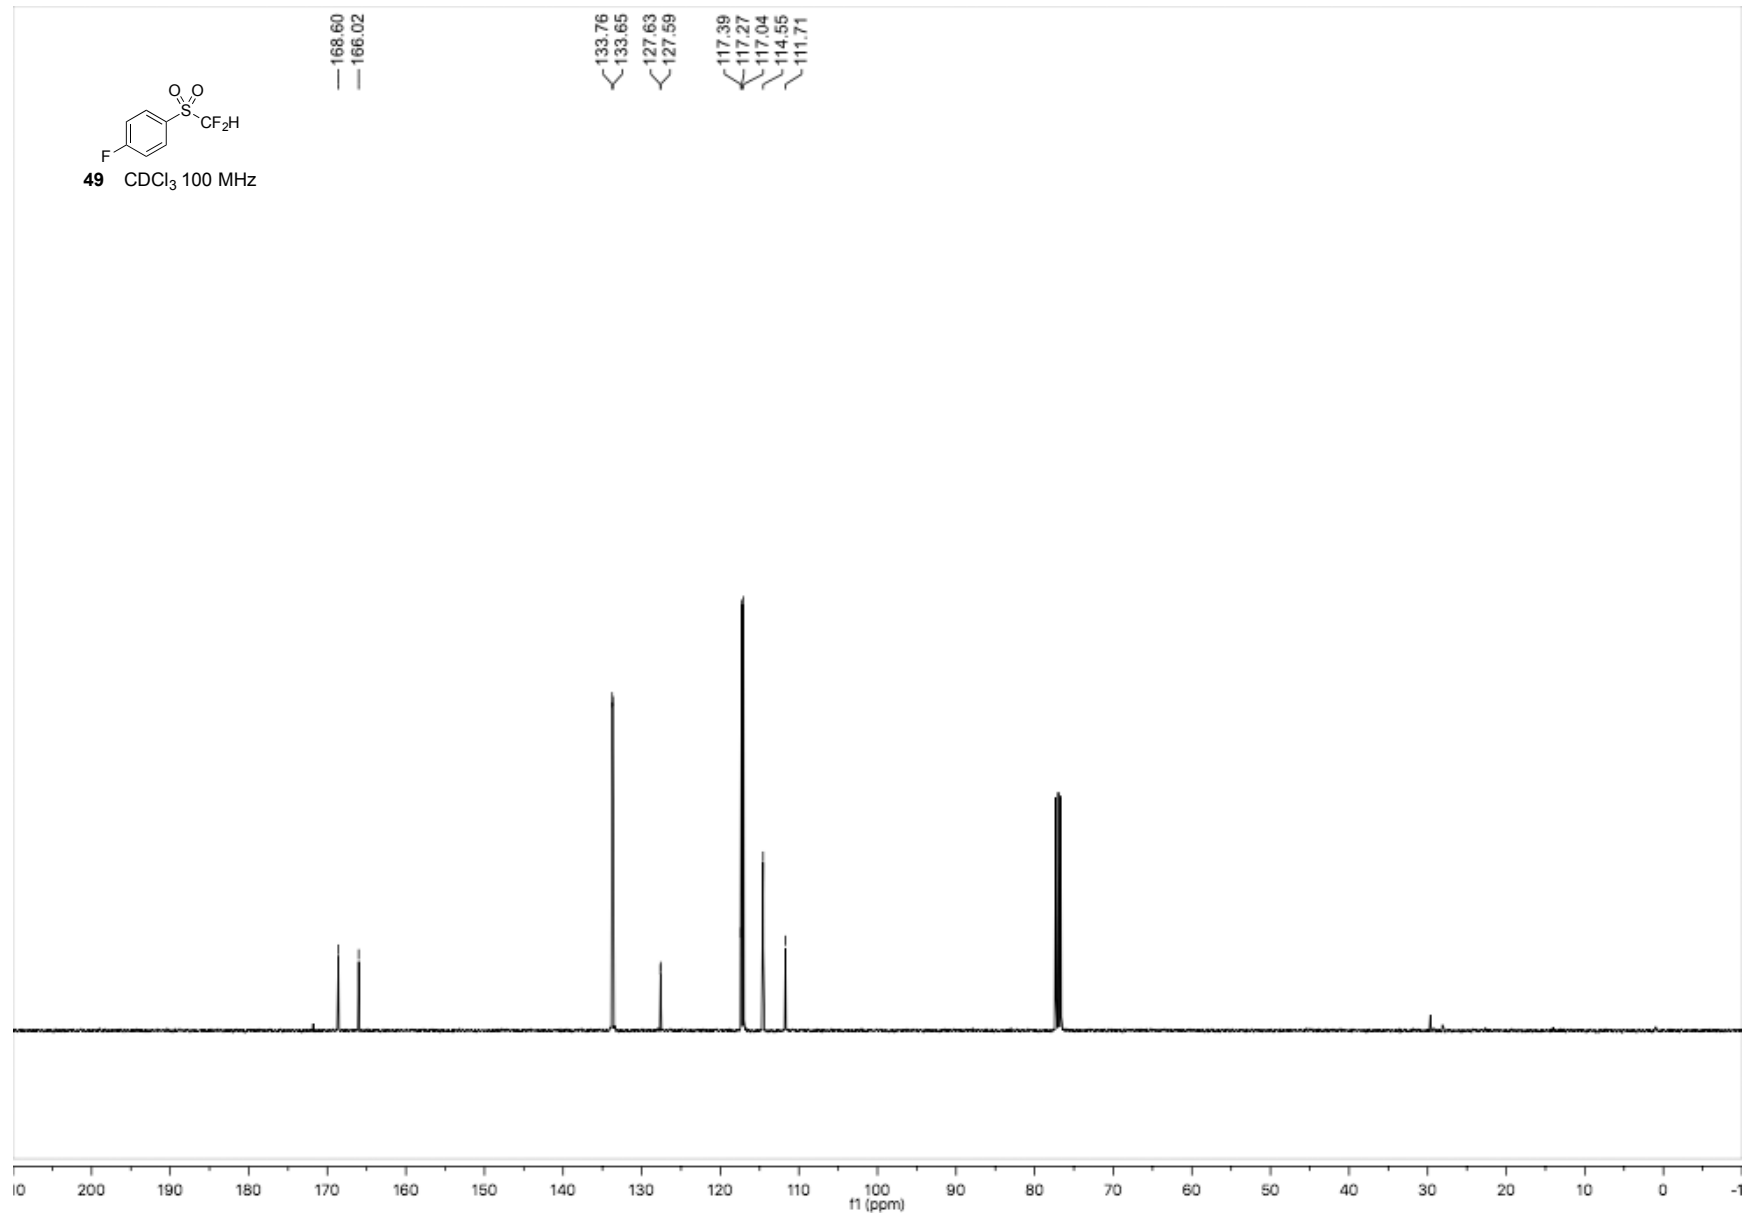

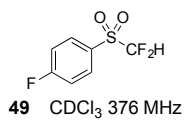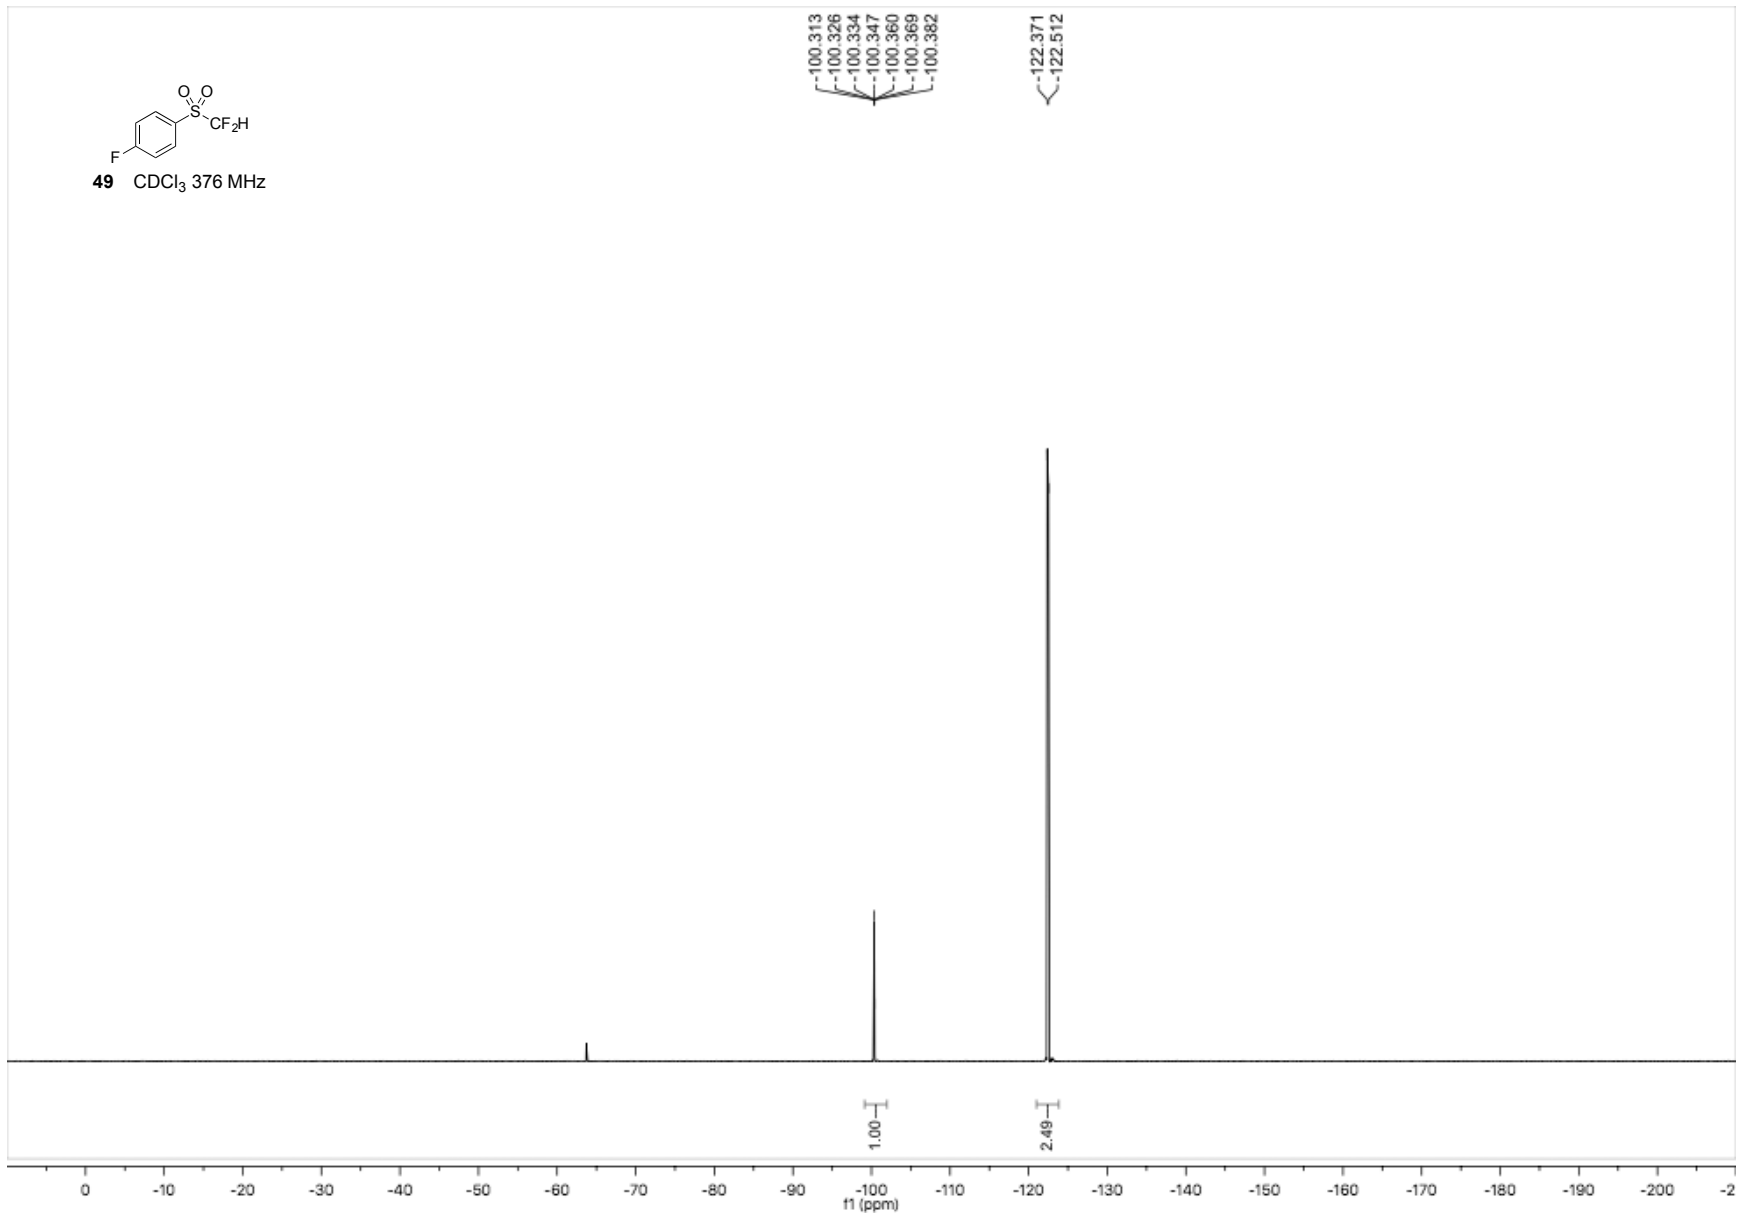

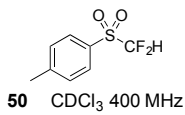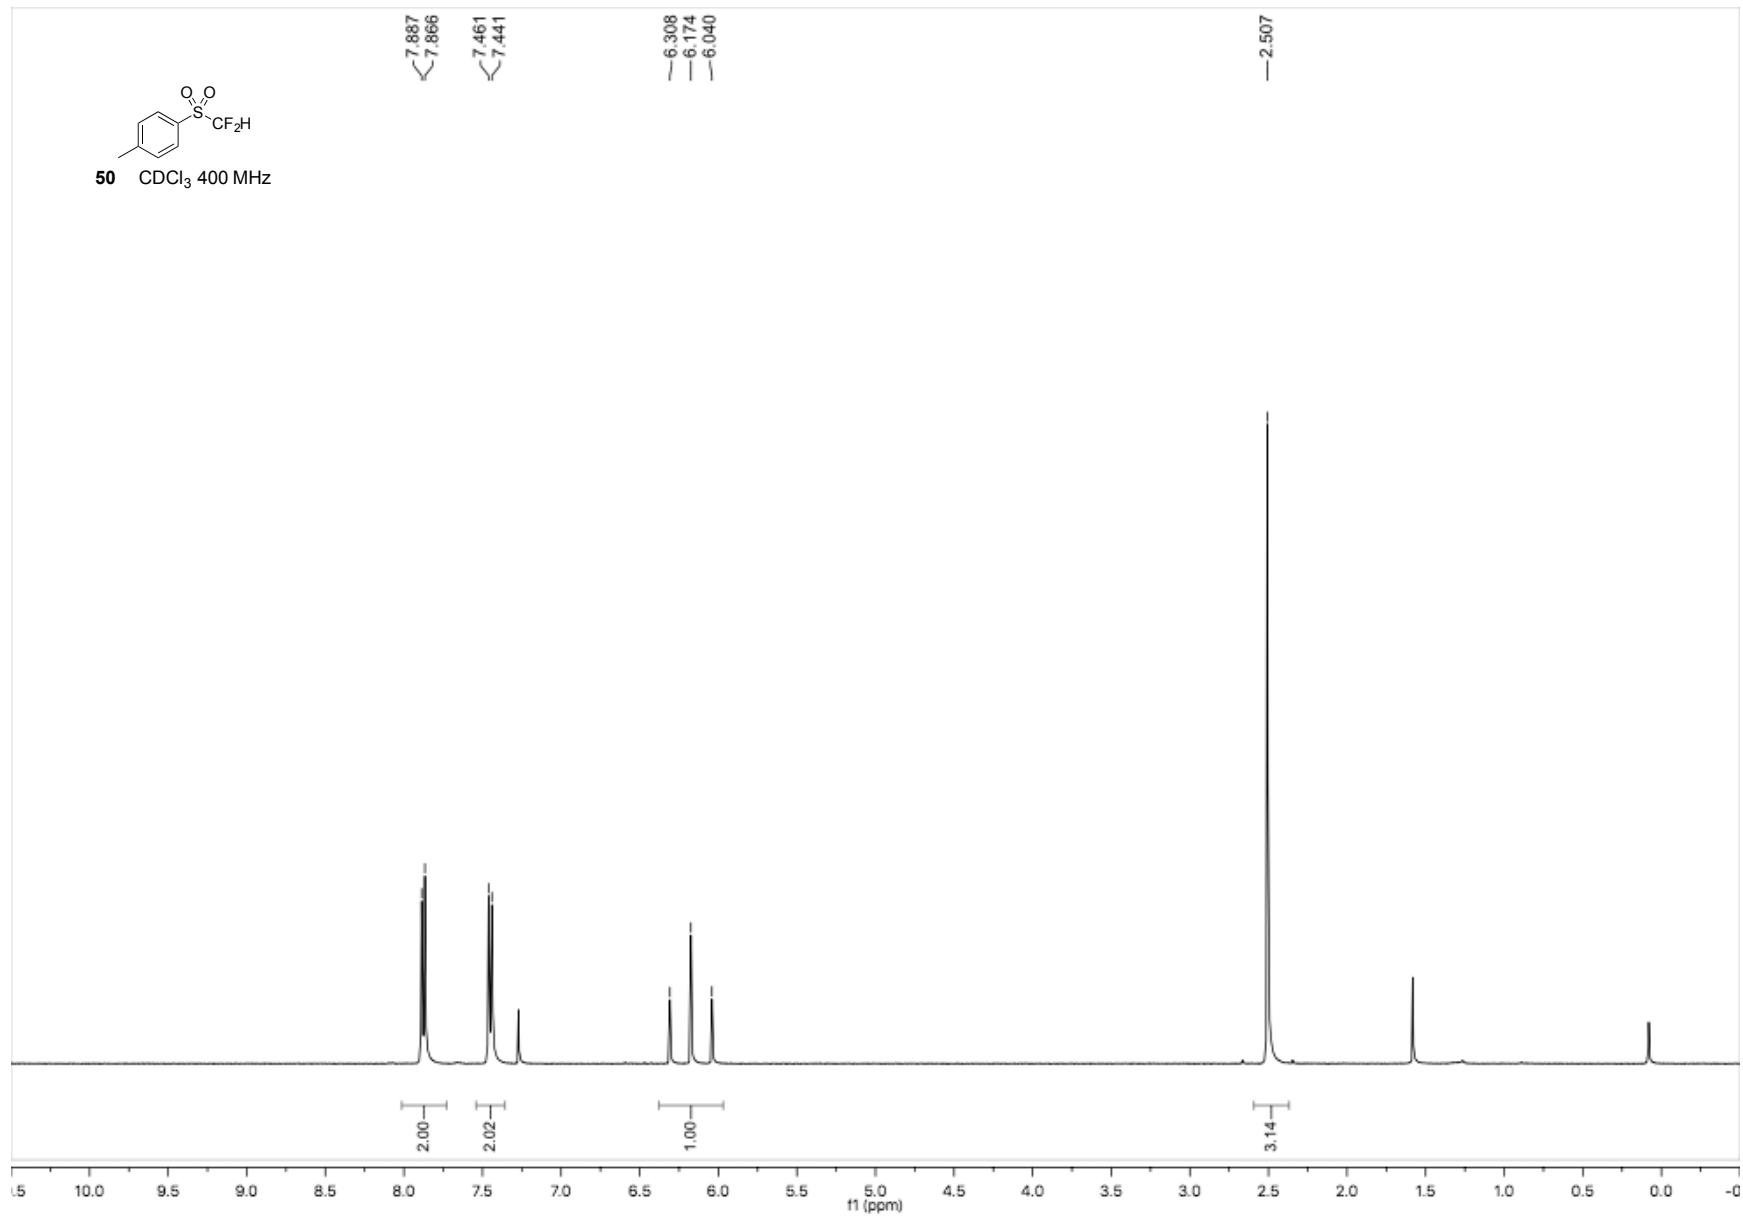



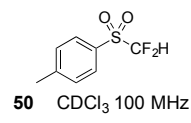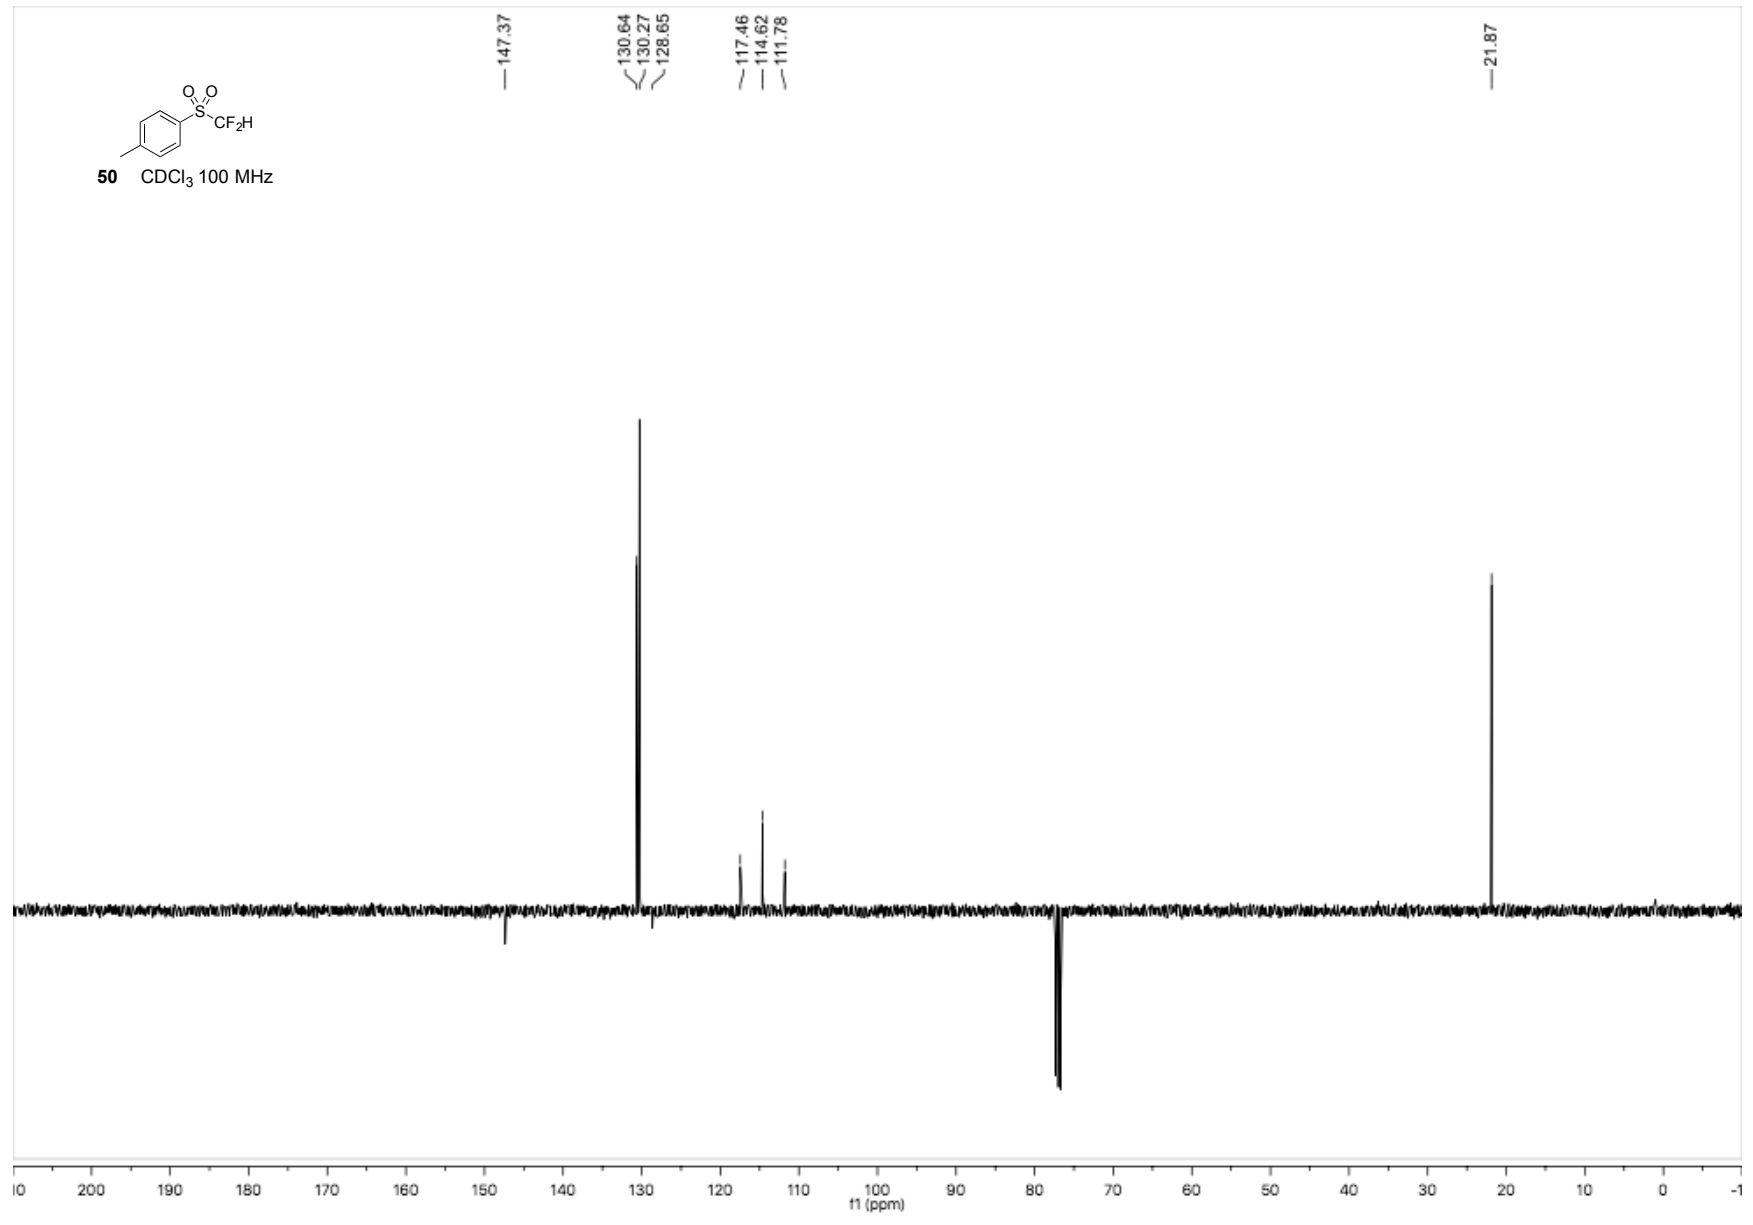

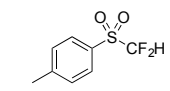

50 CDCl<sub>3</sub> 376 MHz

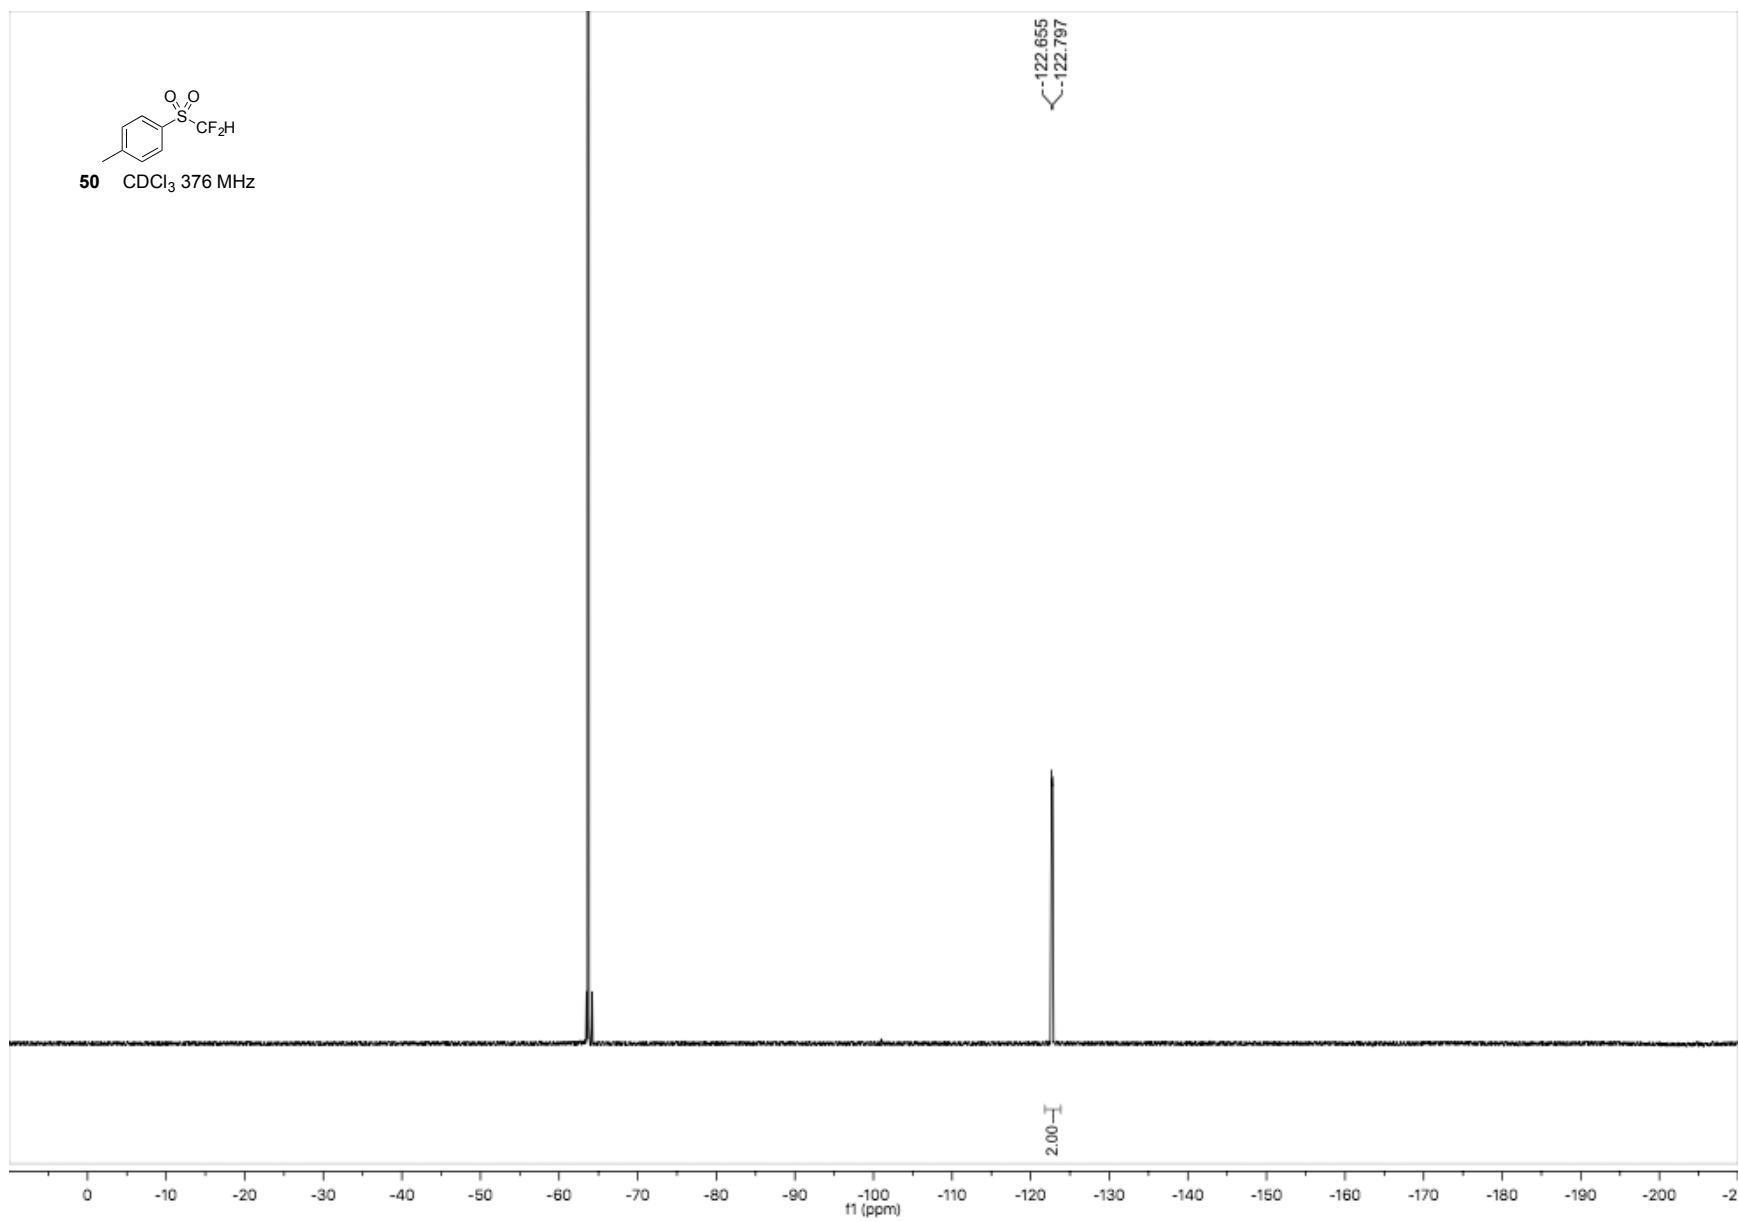

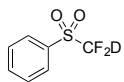

51 CDCl<sub>3</sub> 400 MHz

7.992  
7.973  
7.806  
7.787  
7.768  
7.657  
7.637  
7.618

2.00  
1.02  
2.03

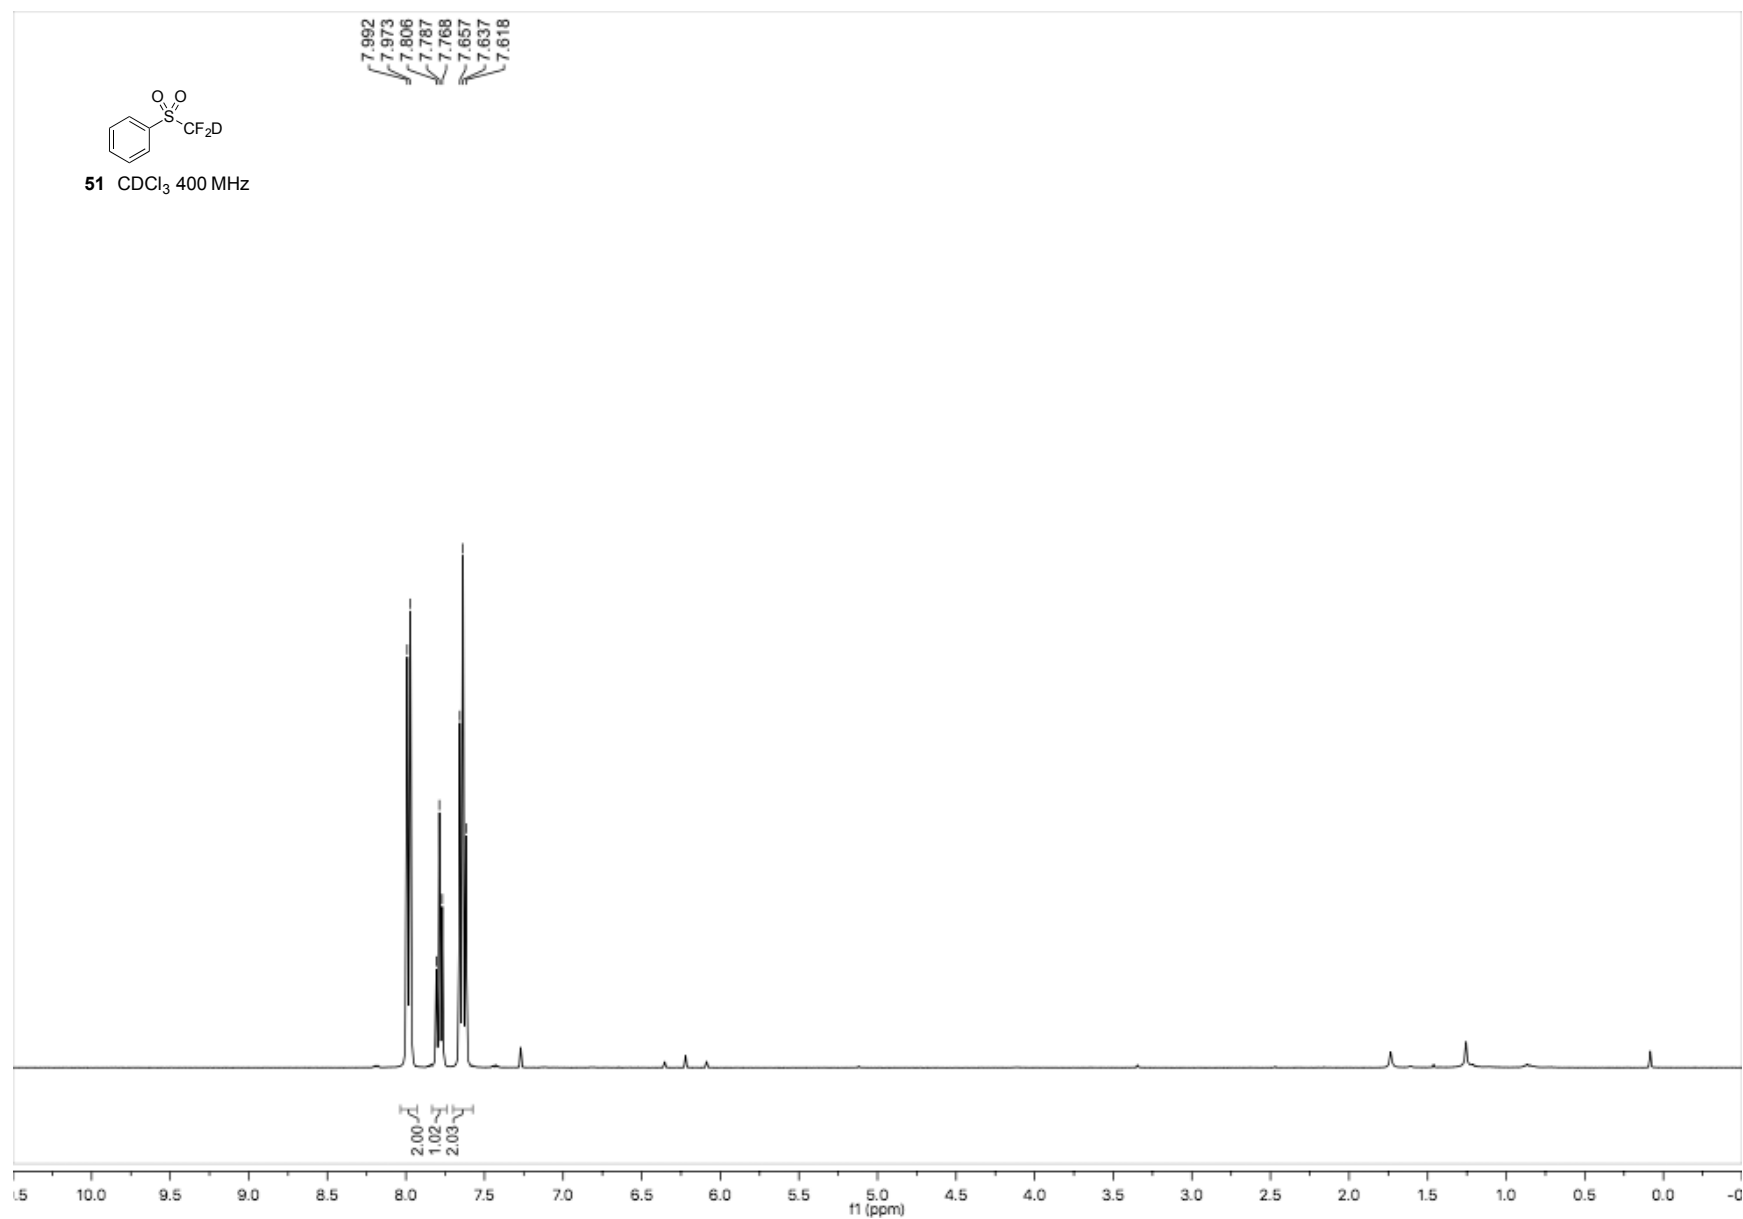

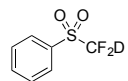

51 CDCl<sub>3</sub> 100 MHz

135.77  
131.69  
130.48  
129.54  
117.35  
117.05  
116.74  
114.54  
114.23  
113.92  
111.71  
111.40  
111.09

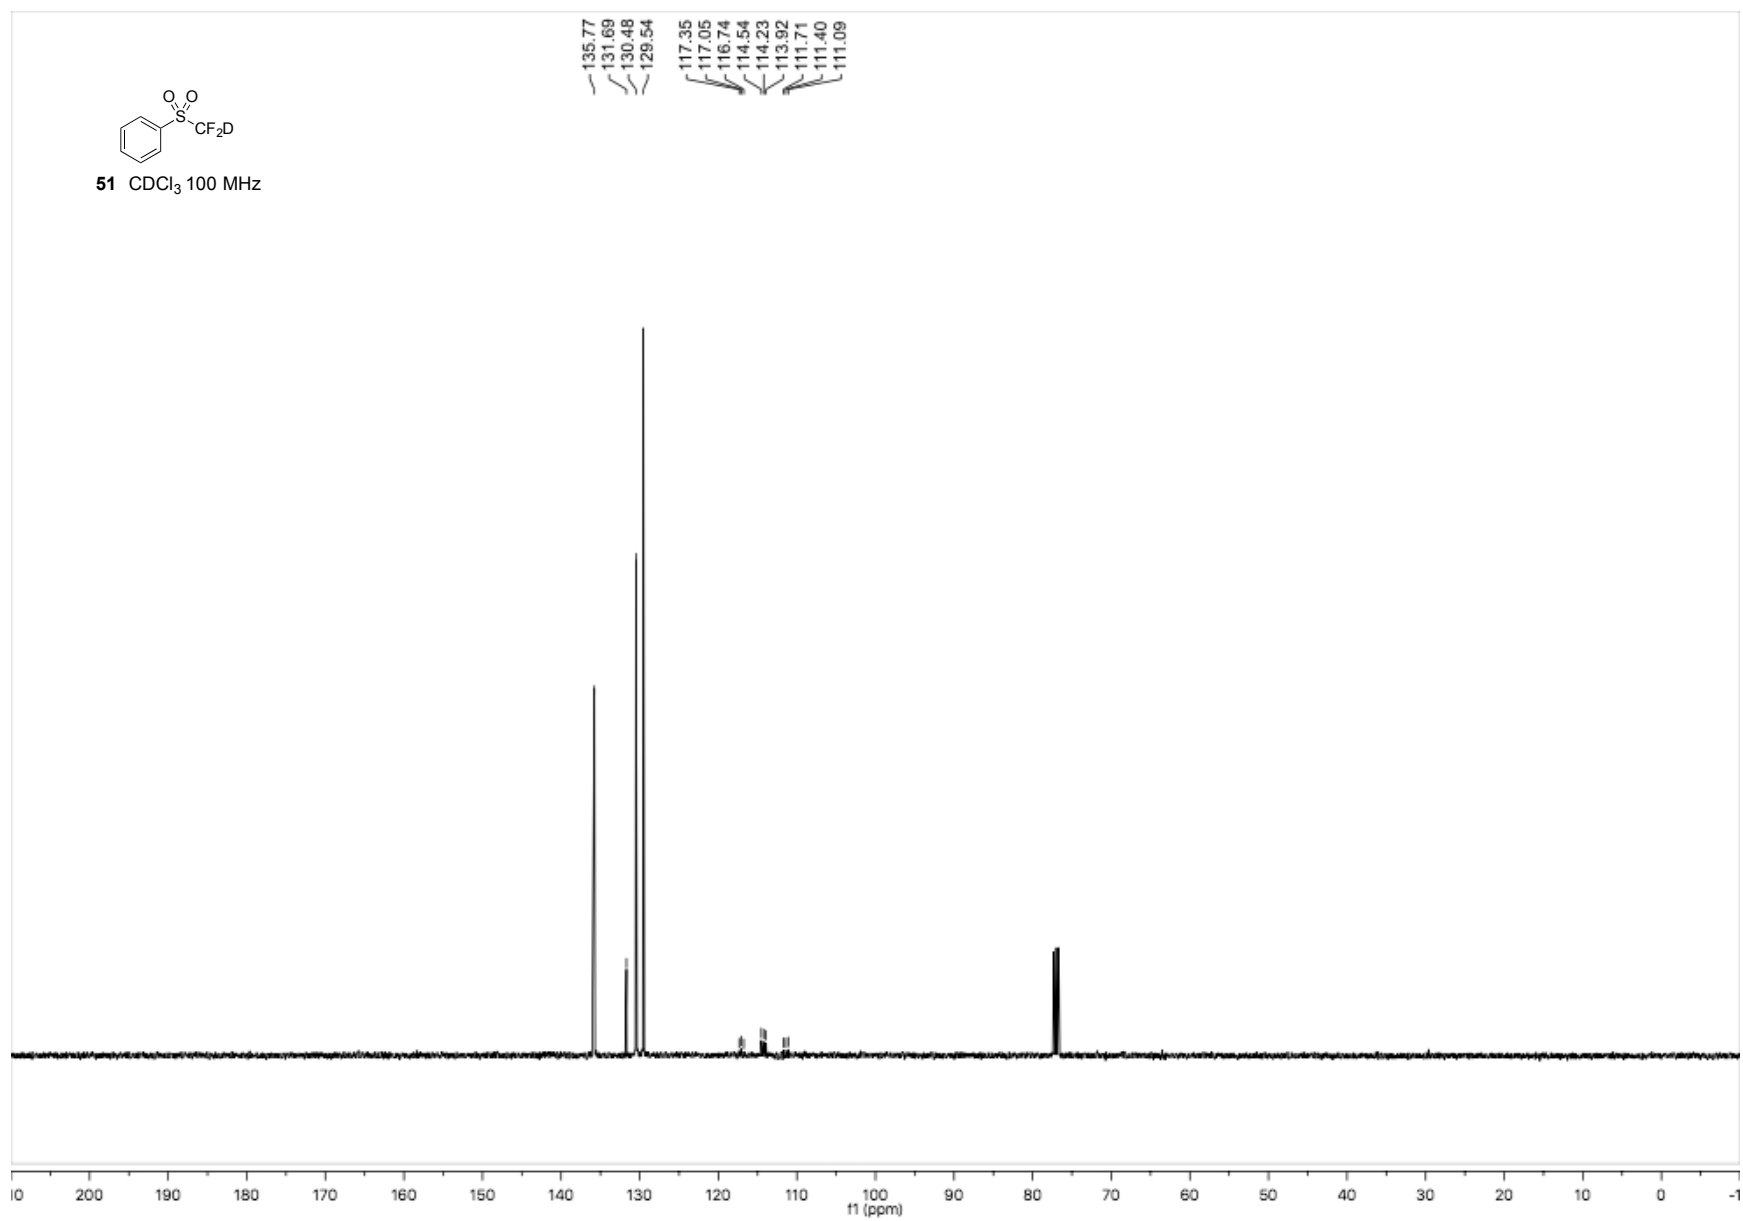

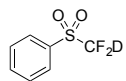

51 CDCl<sub>3</sub> 376 MHz

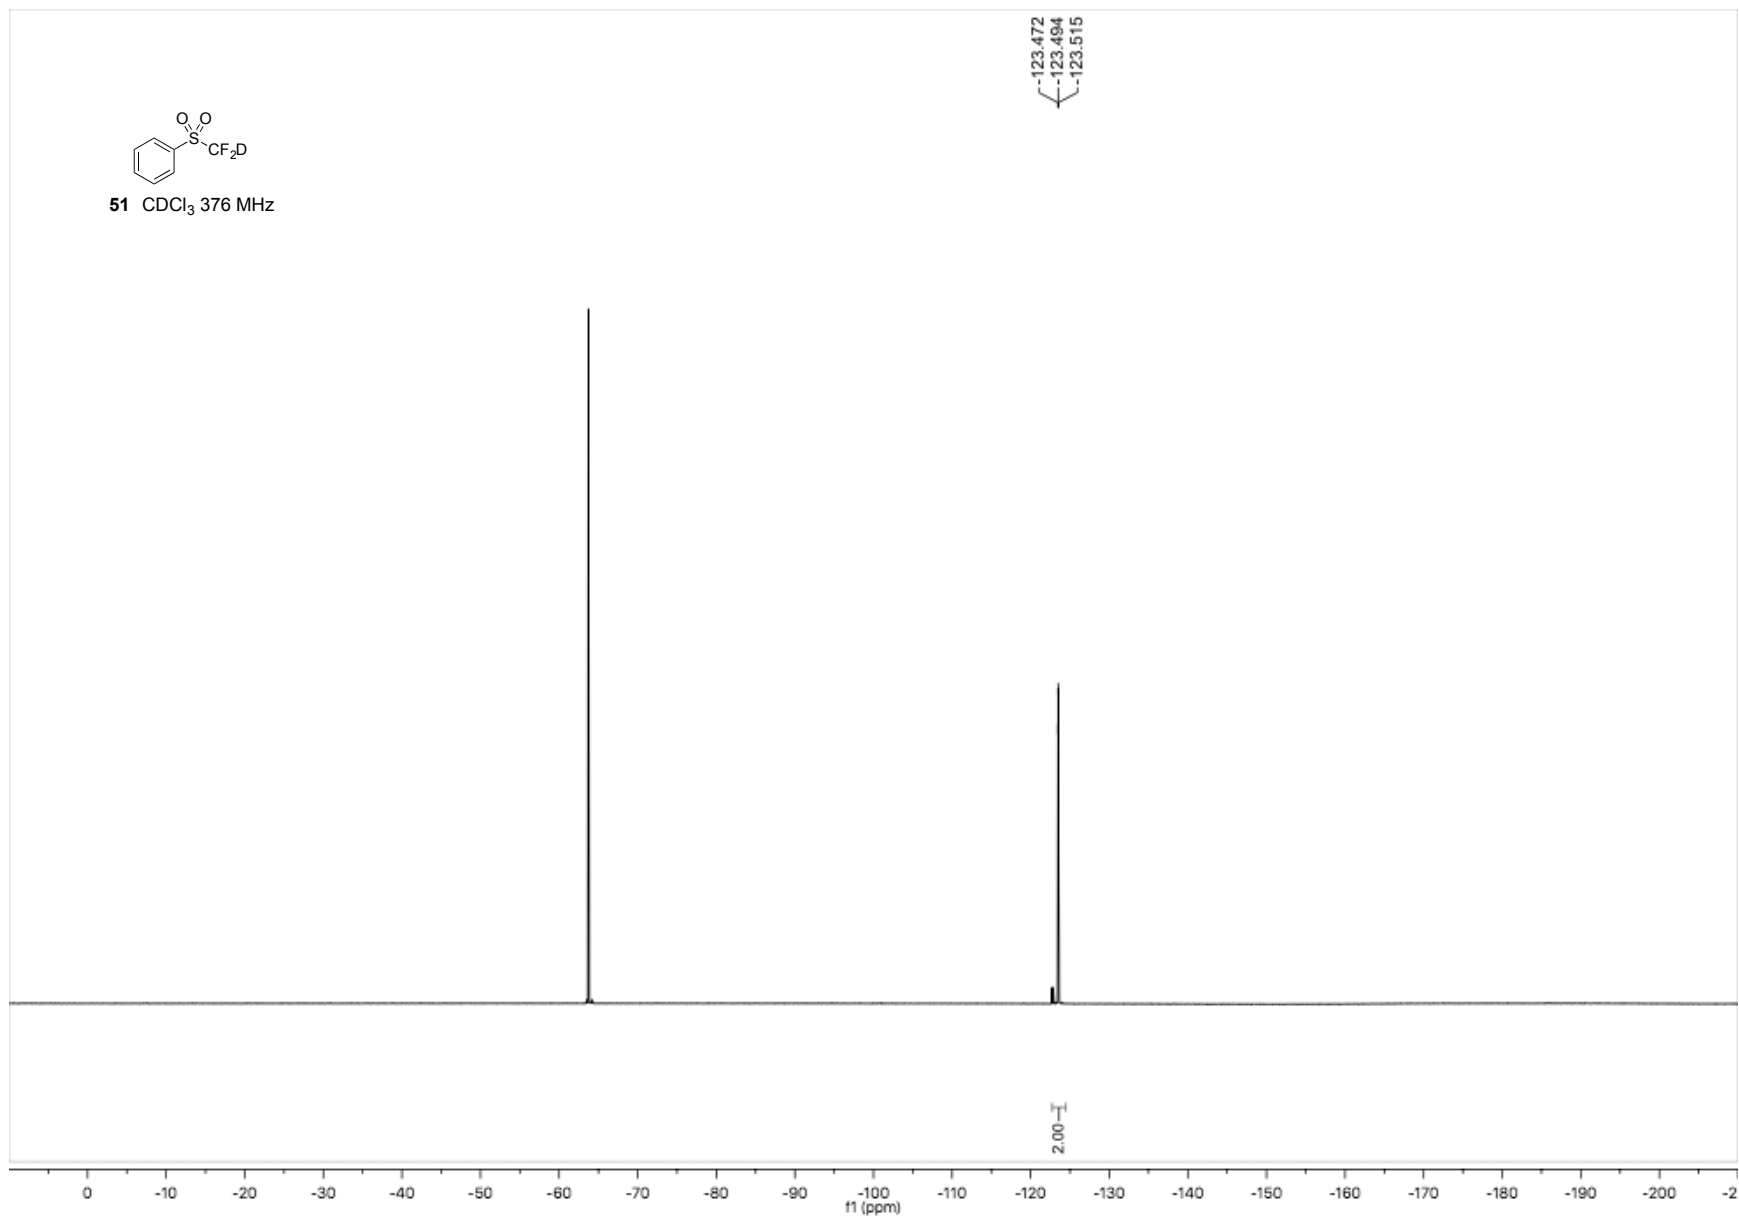

S101

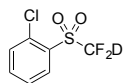

52 CDCl<sub>3</sub> 400 MHz

8.193  
8.173  
7.725  
7.705  
7.687  
7.643  
7.623  
7.580  
7.561  
7.542

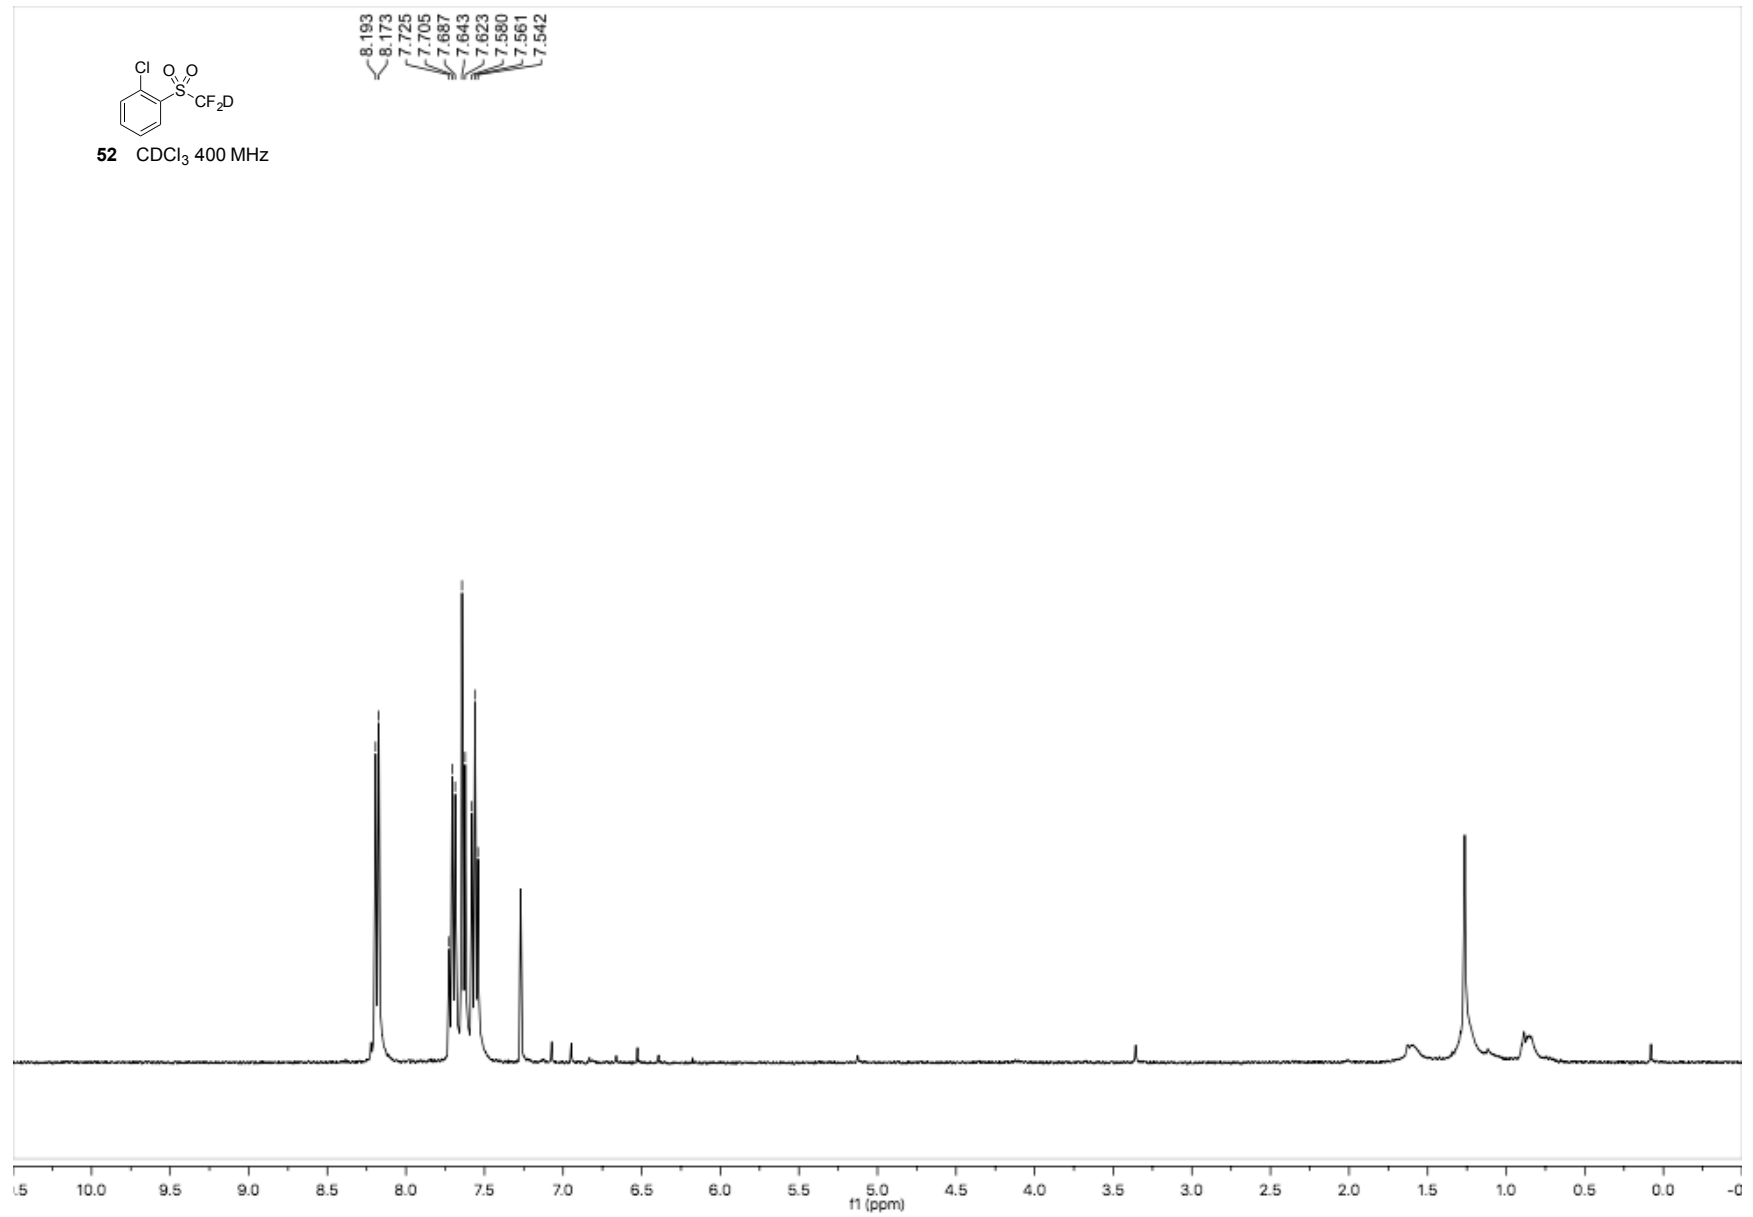

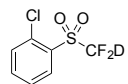

52 CDCl<sub>3</sub> 100 MHz

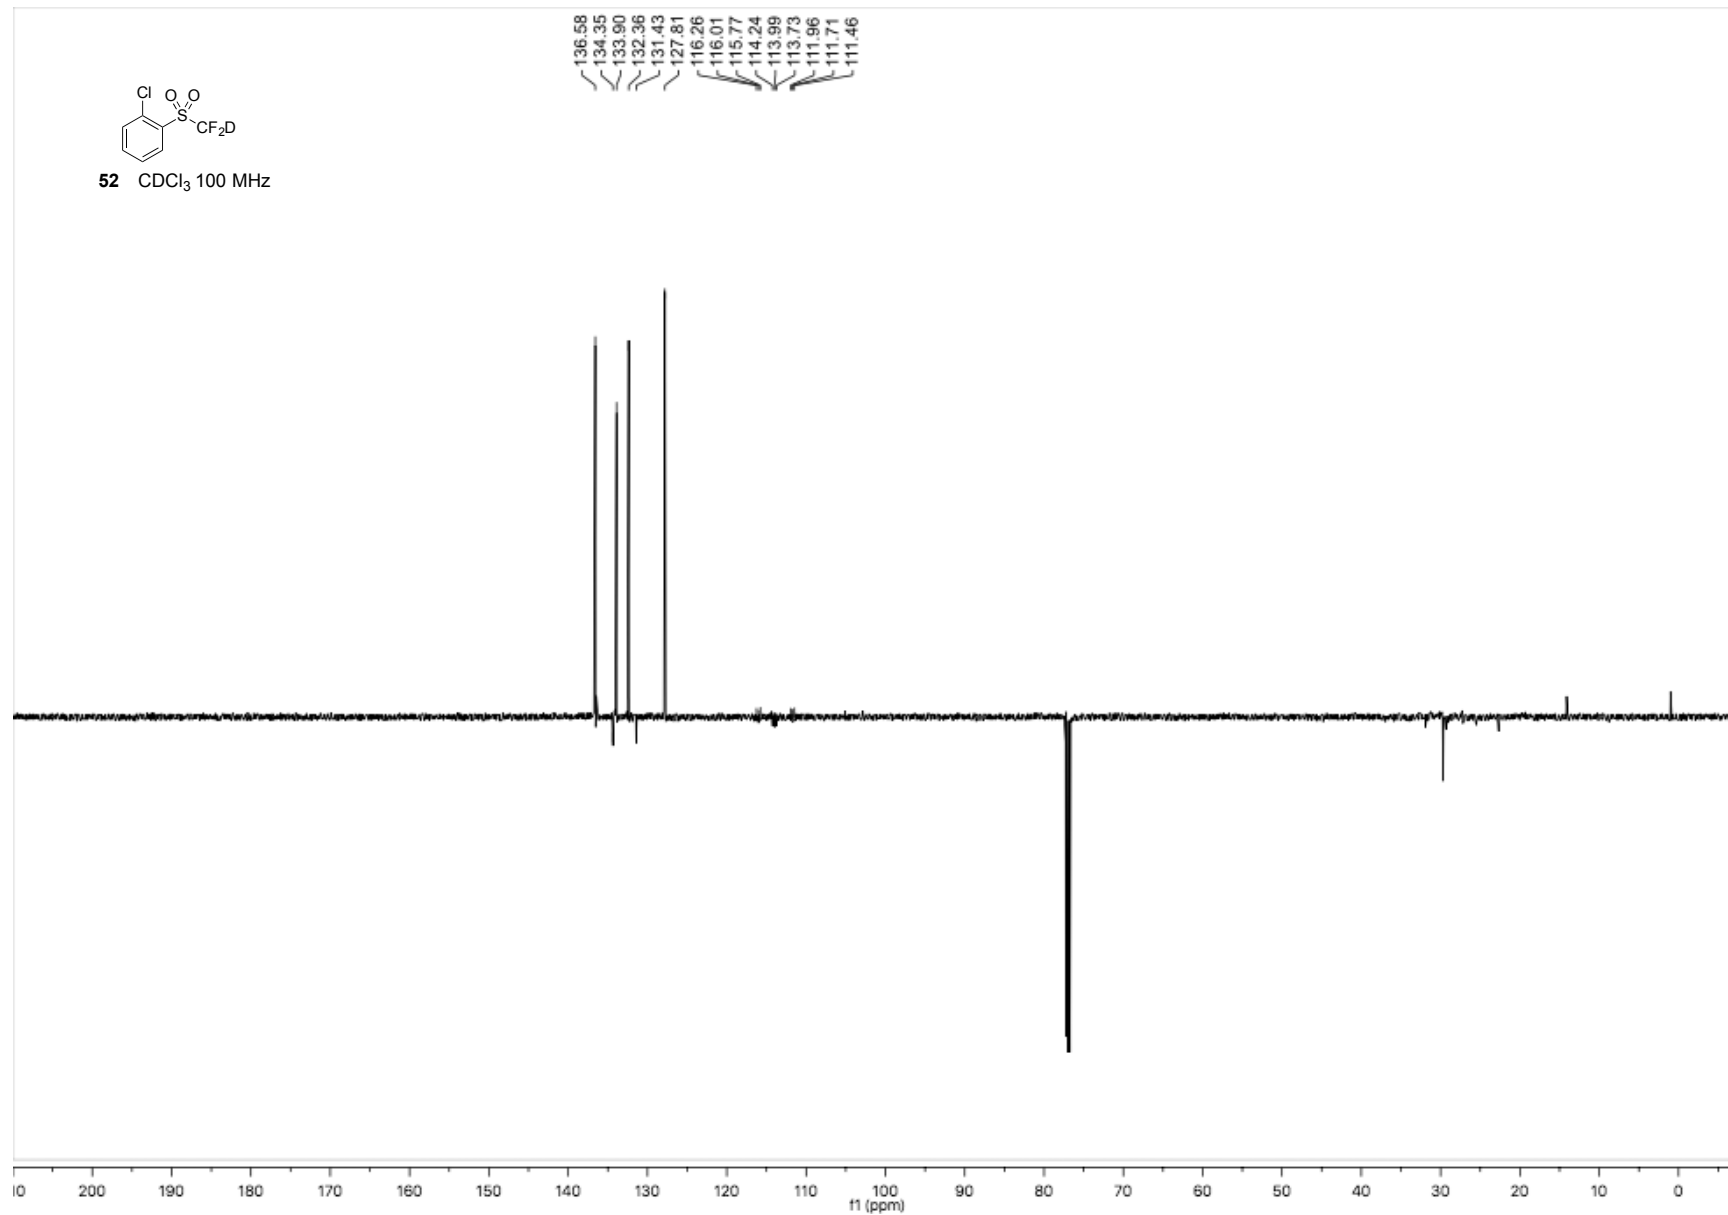

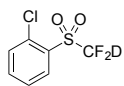

52 CDCl<sub>3</sub> 376 MHz

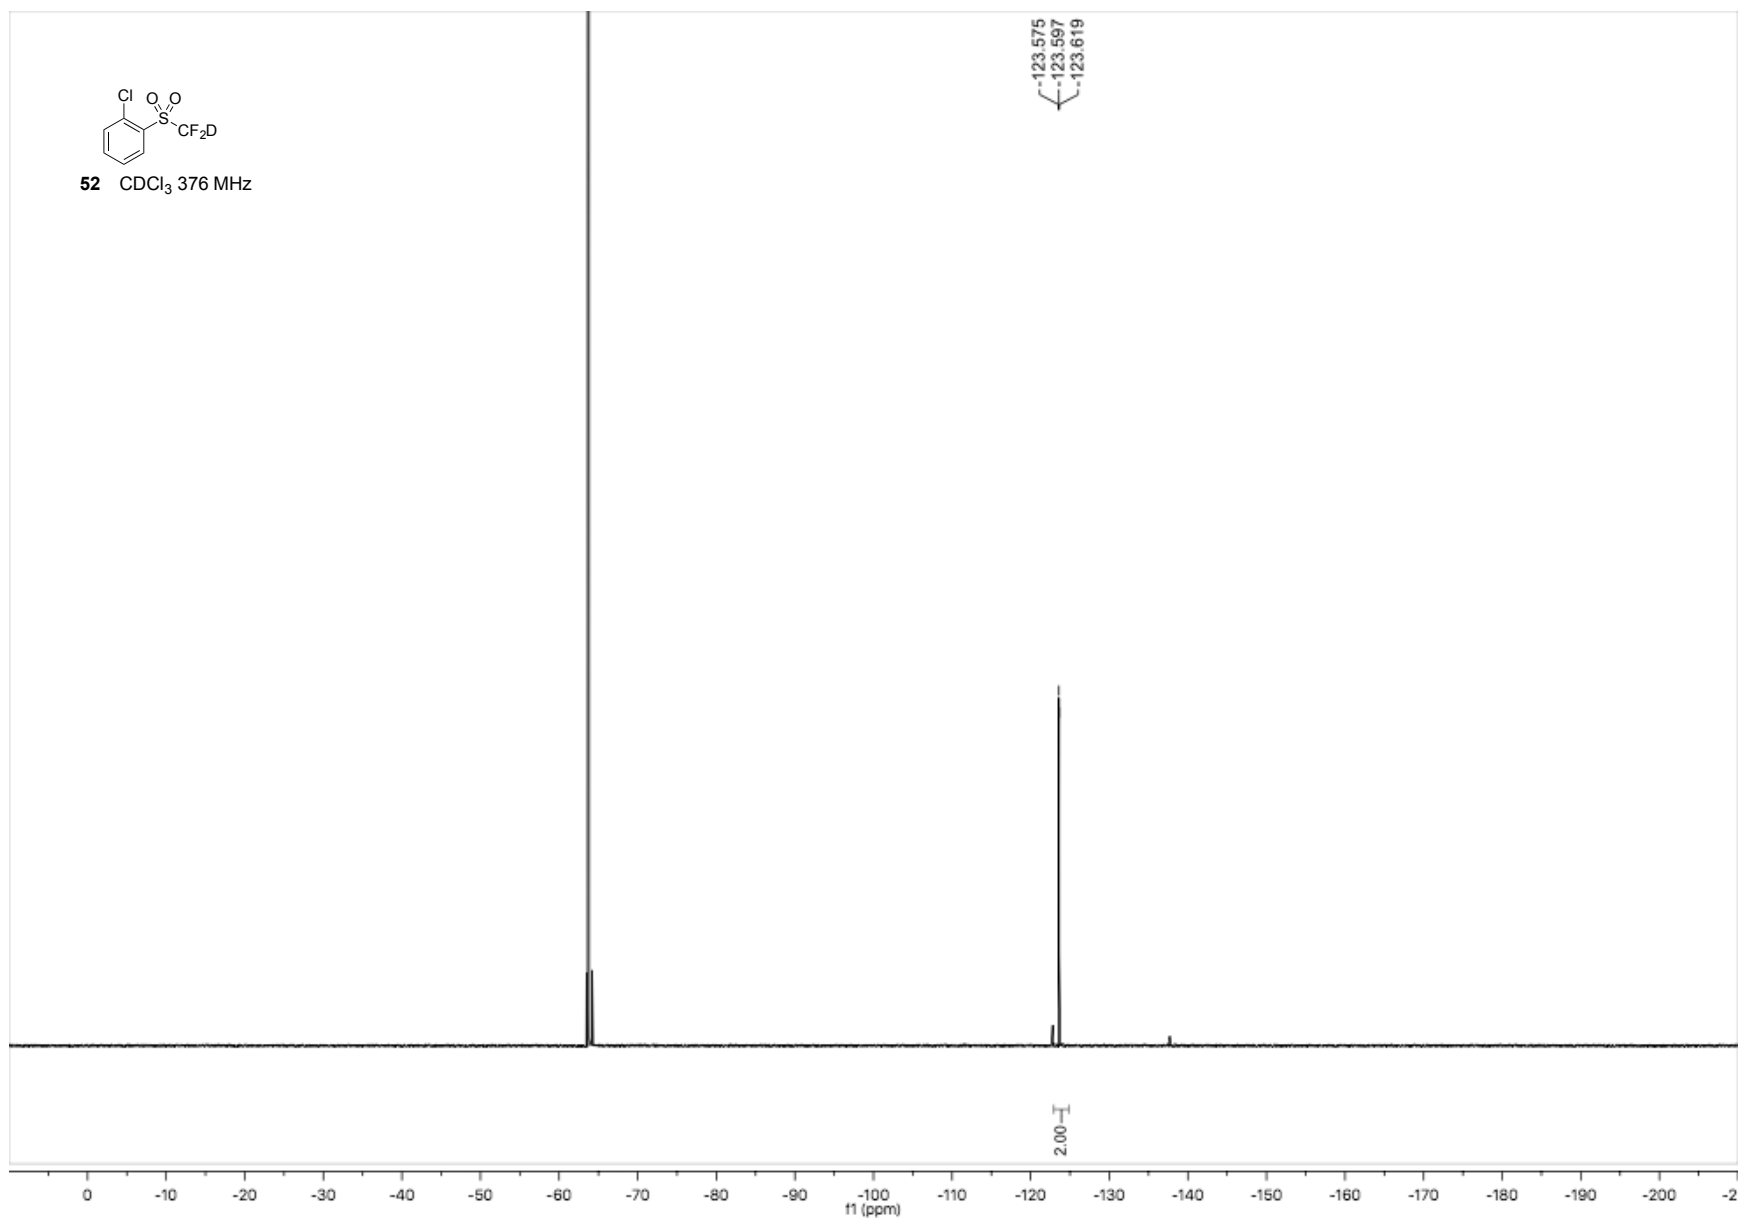



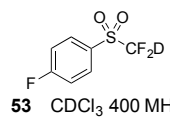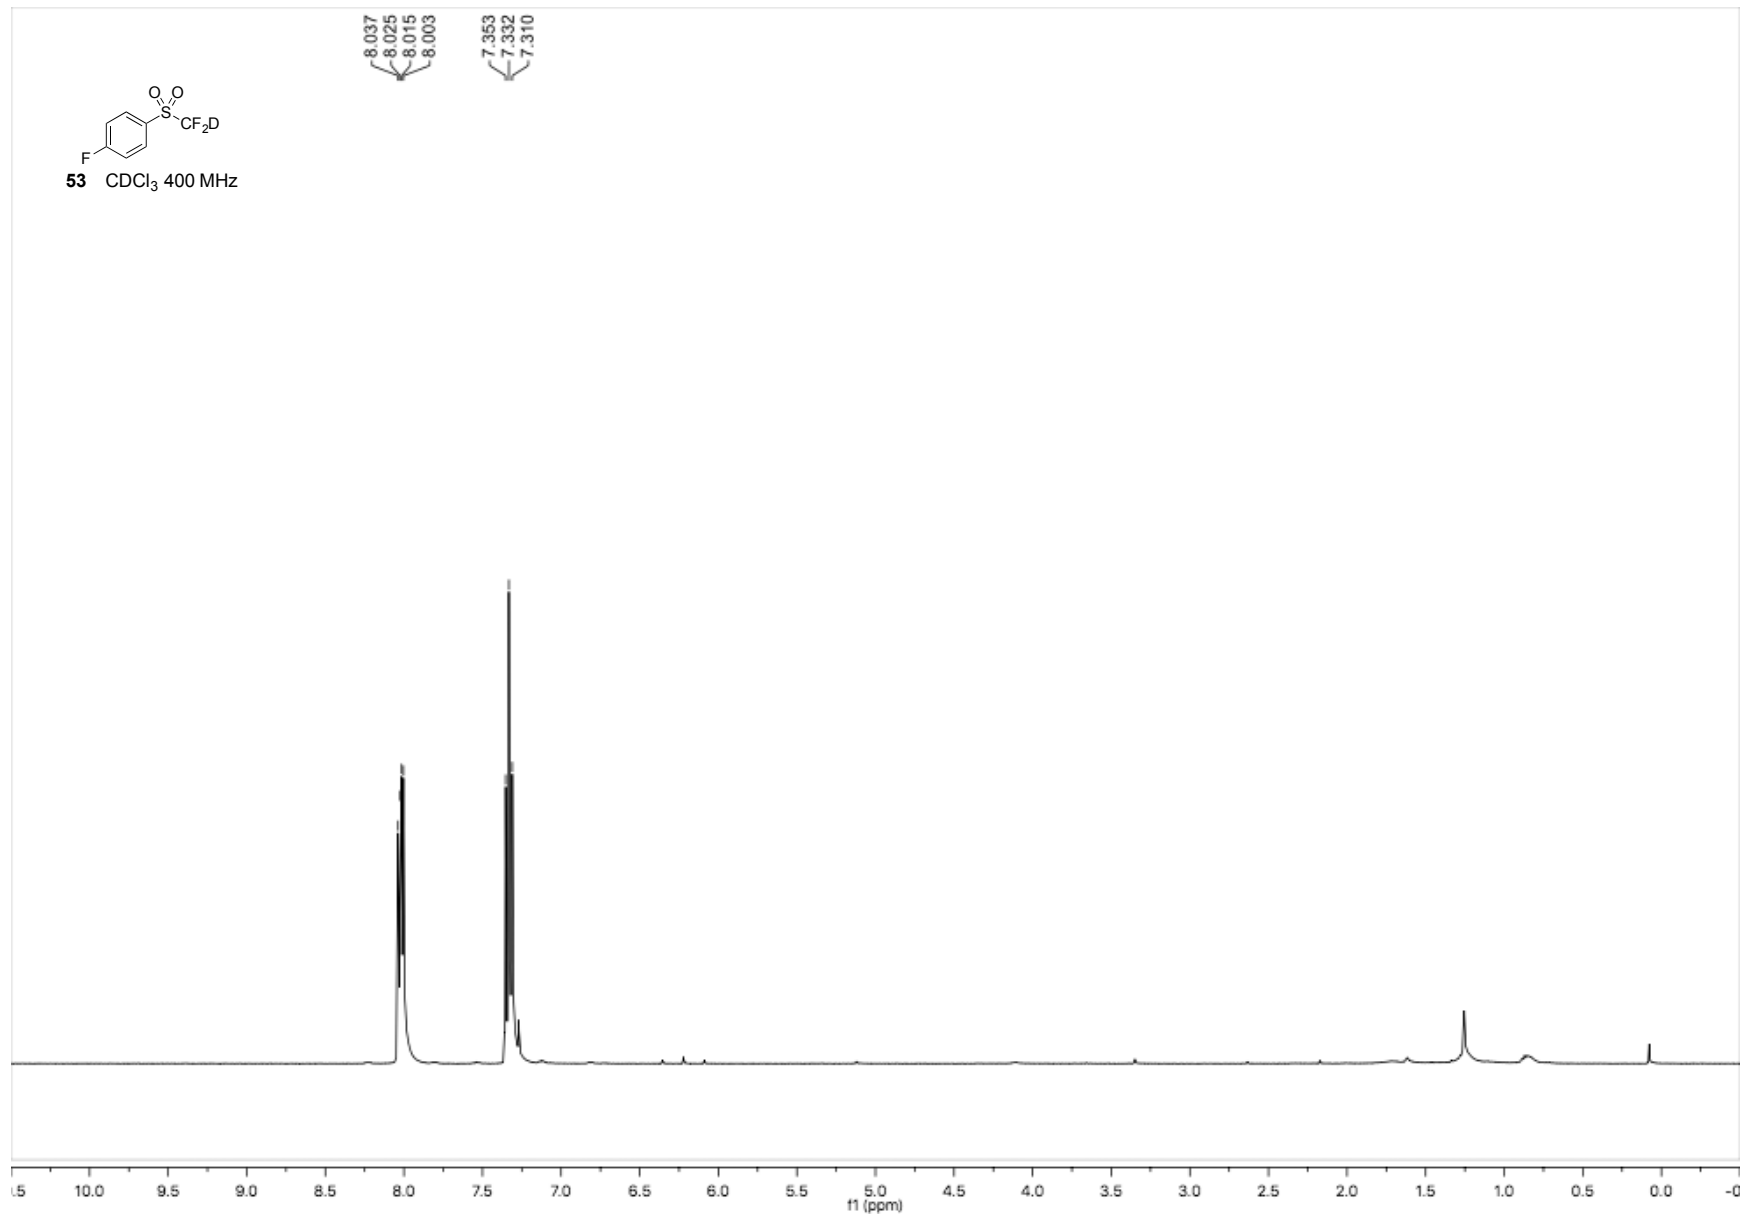

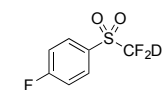

53 CDCl<sub>3</sub> 100 MHz

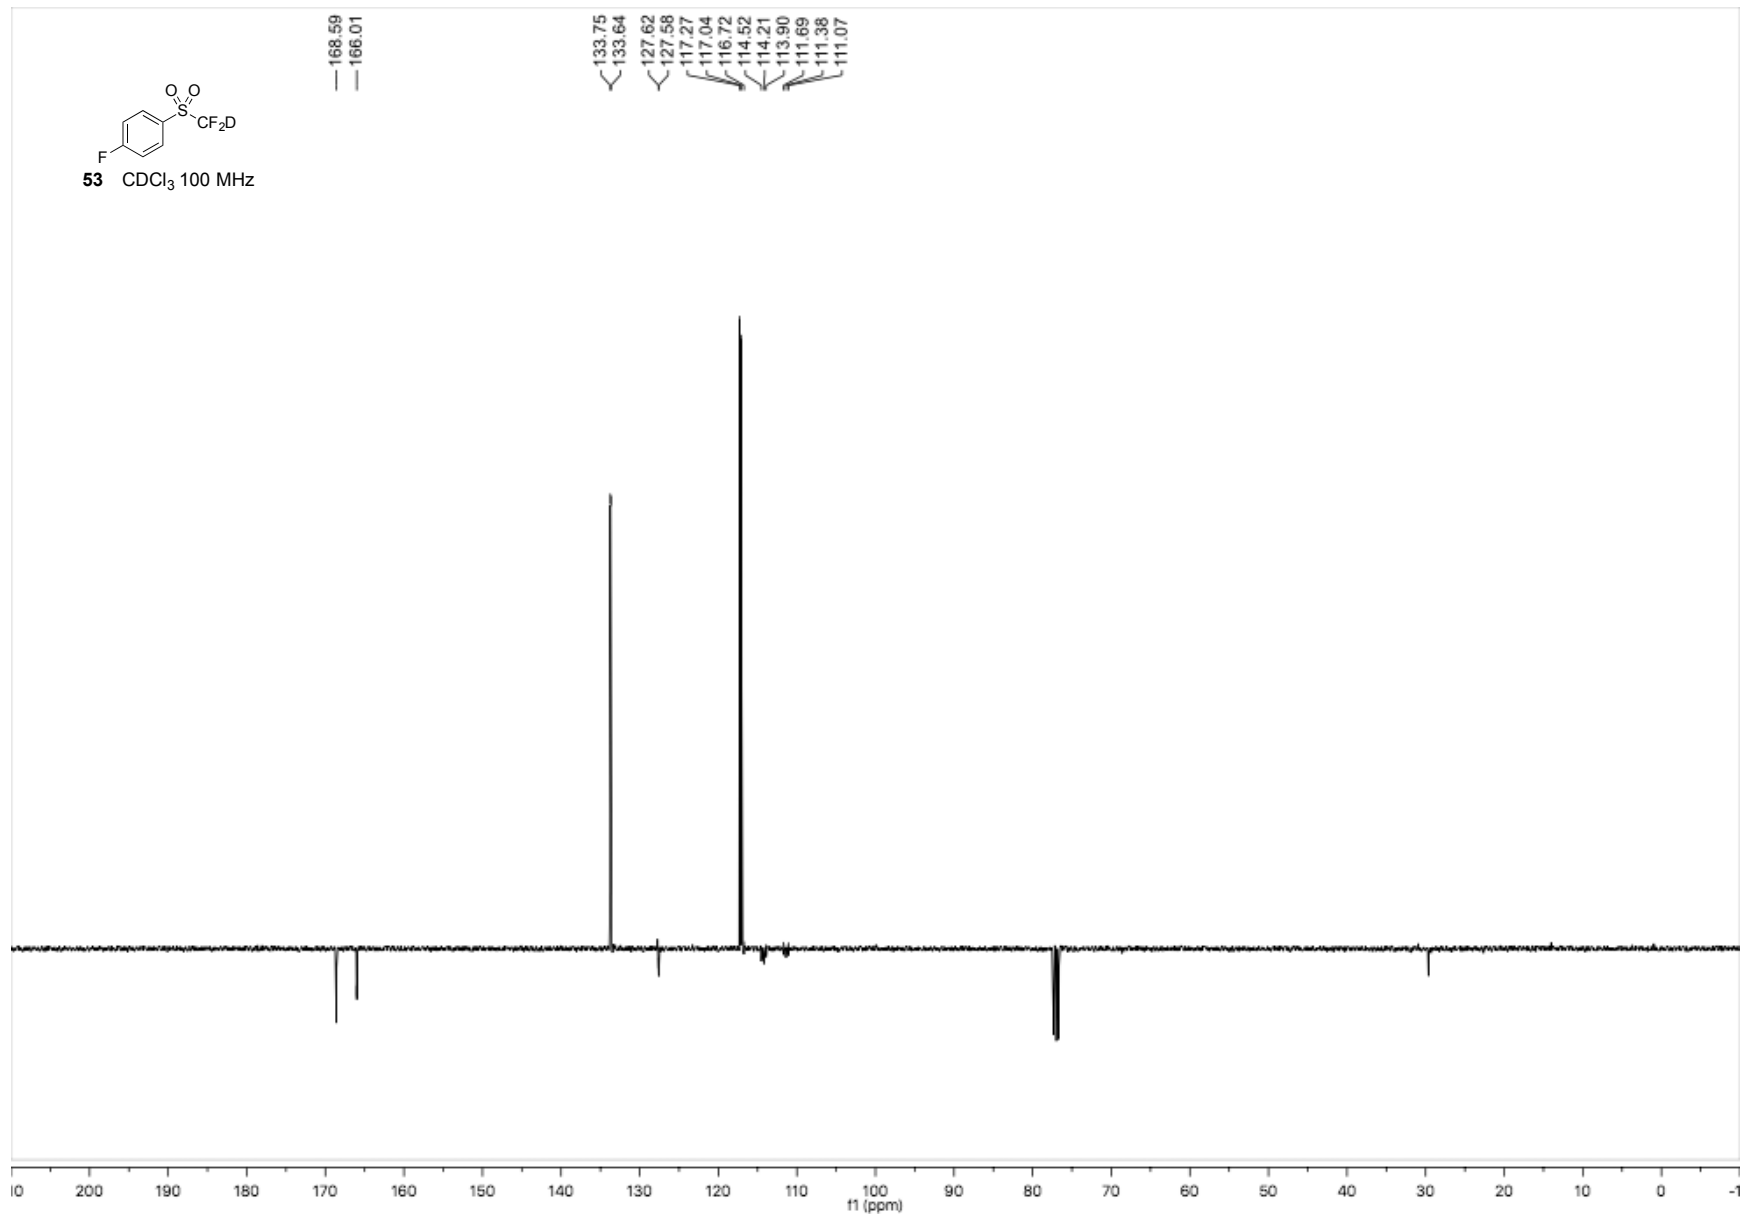

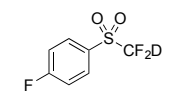

53 CDCl<sub>3</sub> 376 MHz

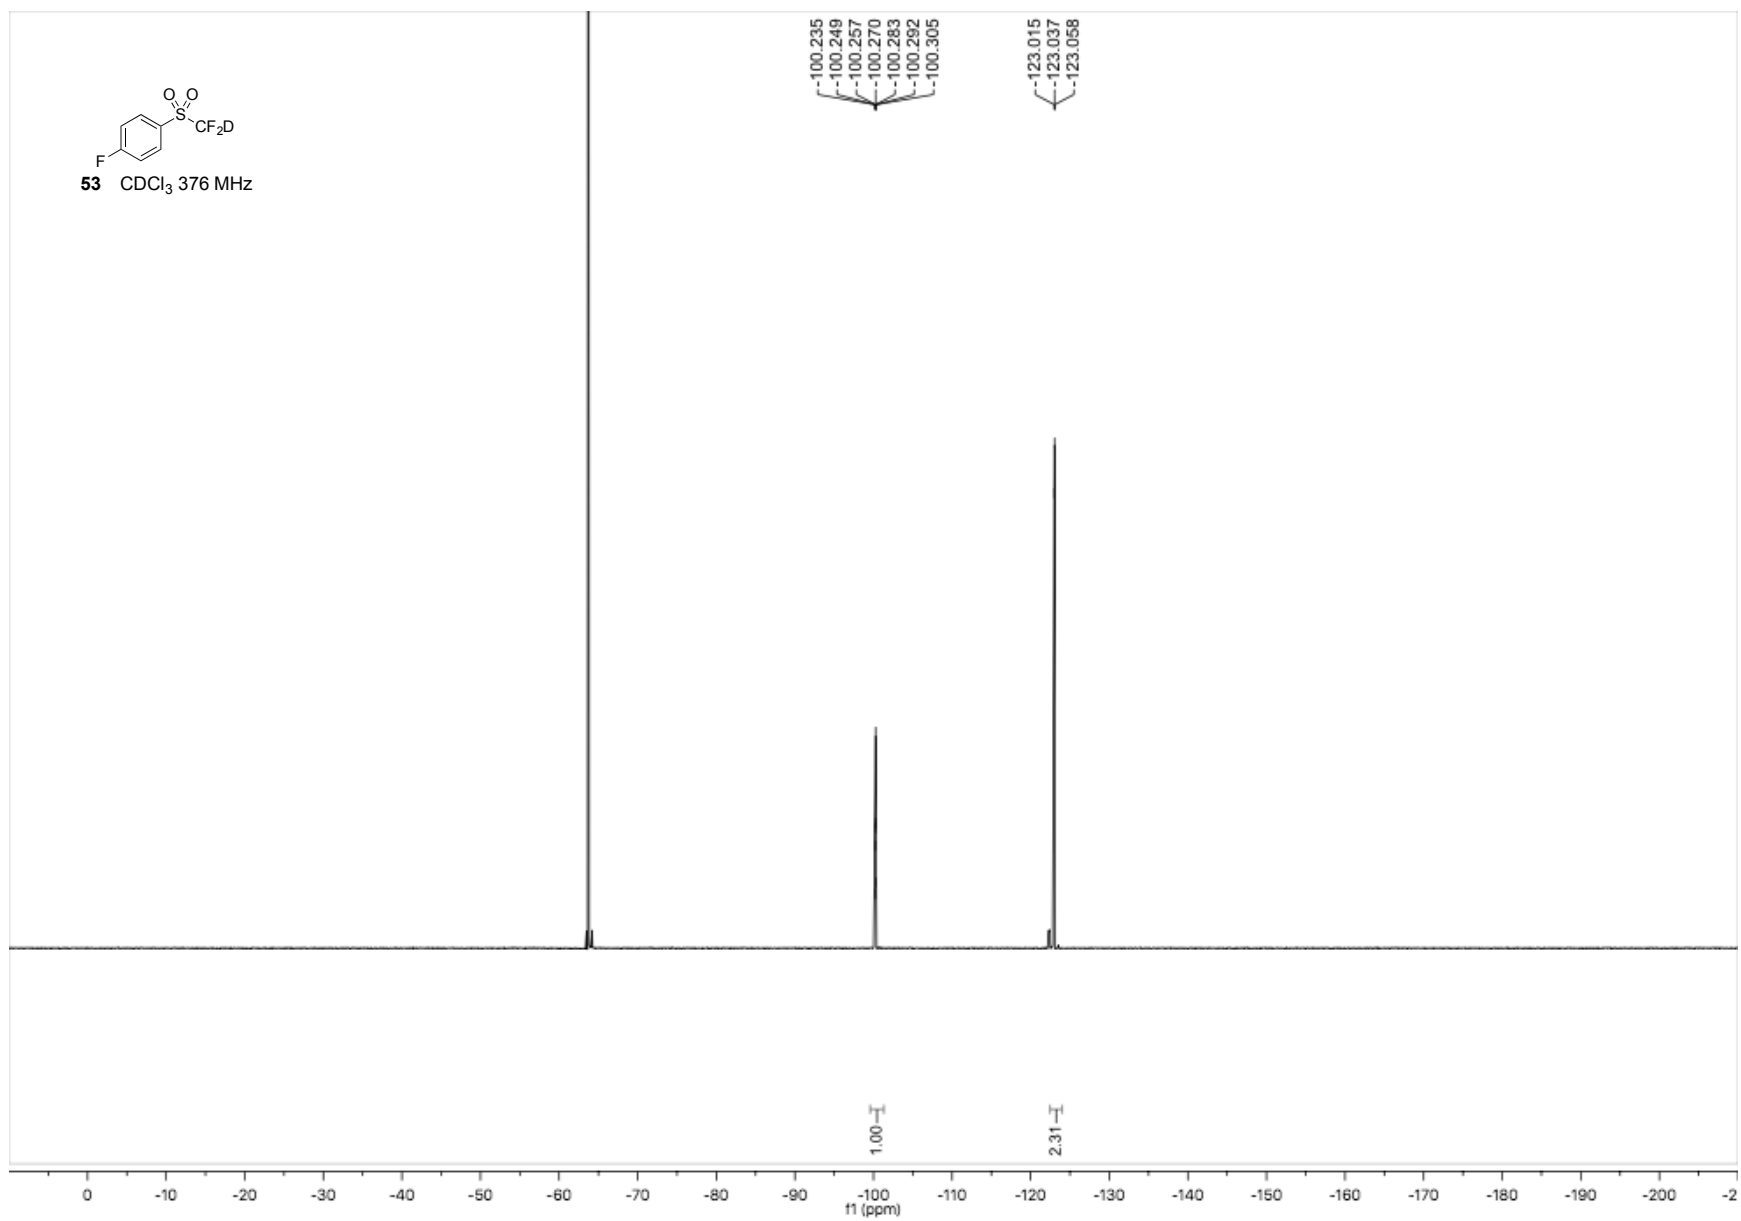

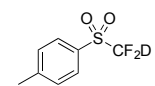

54 CDCl<sub>3</sub> 400 MHz

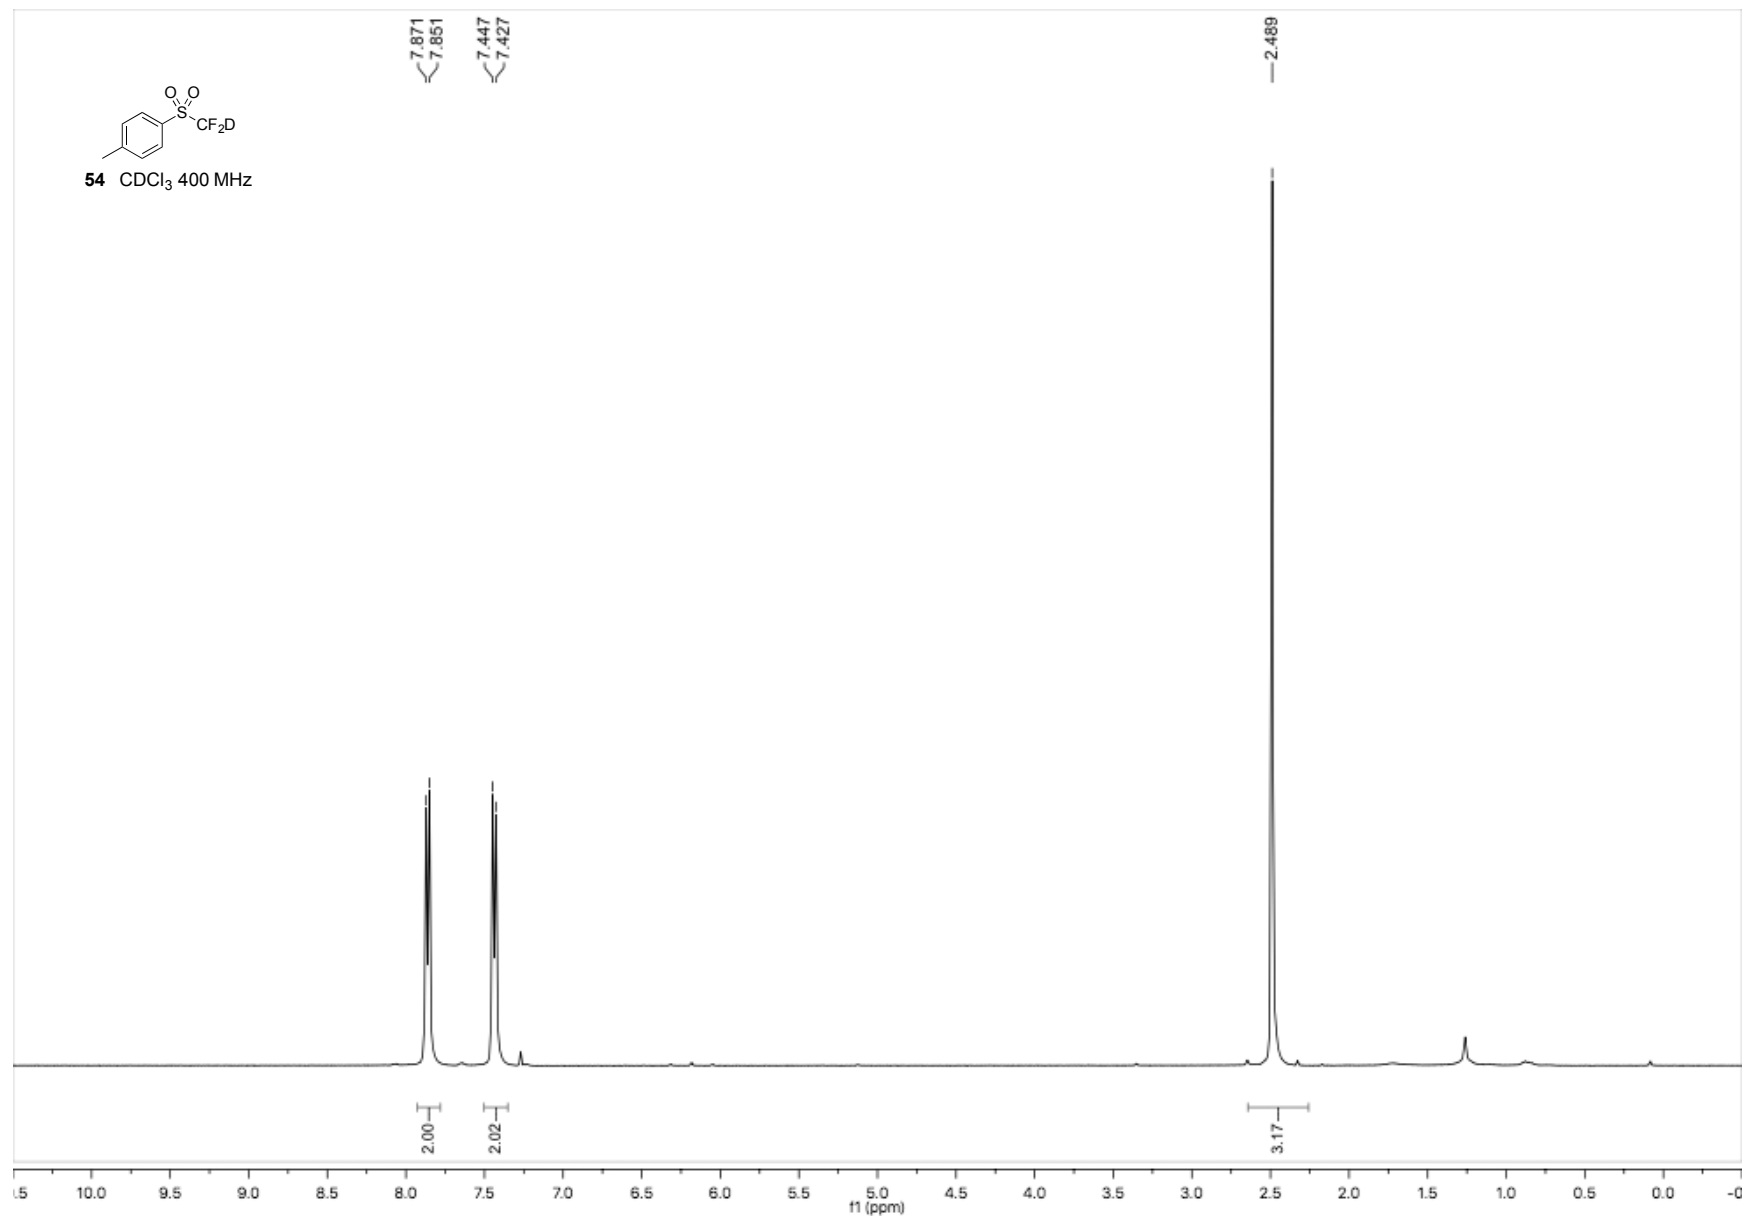

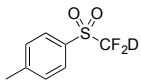

54 CDCl<sub>3</sub> 100 MHz

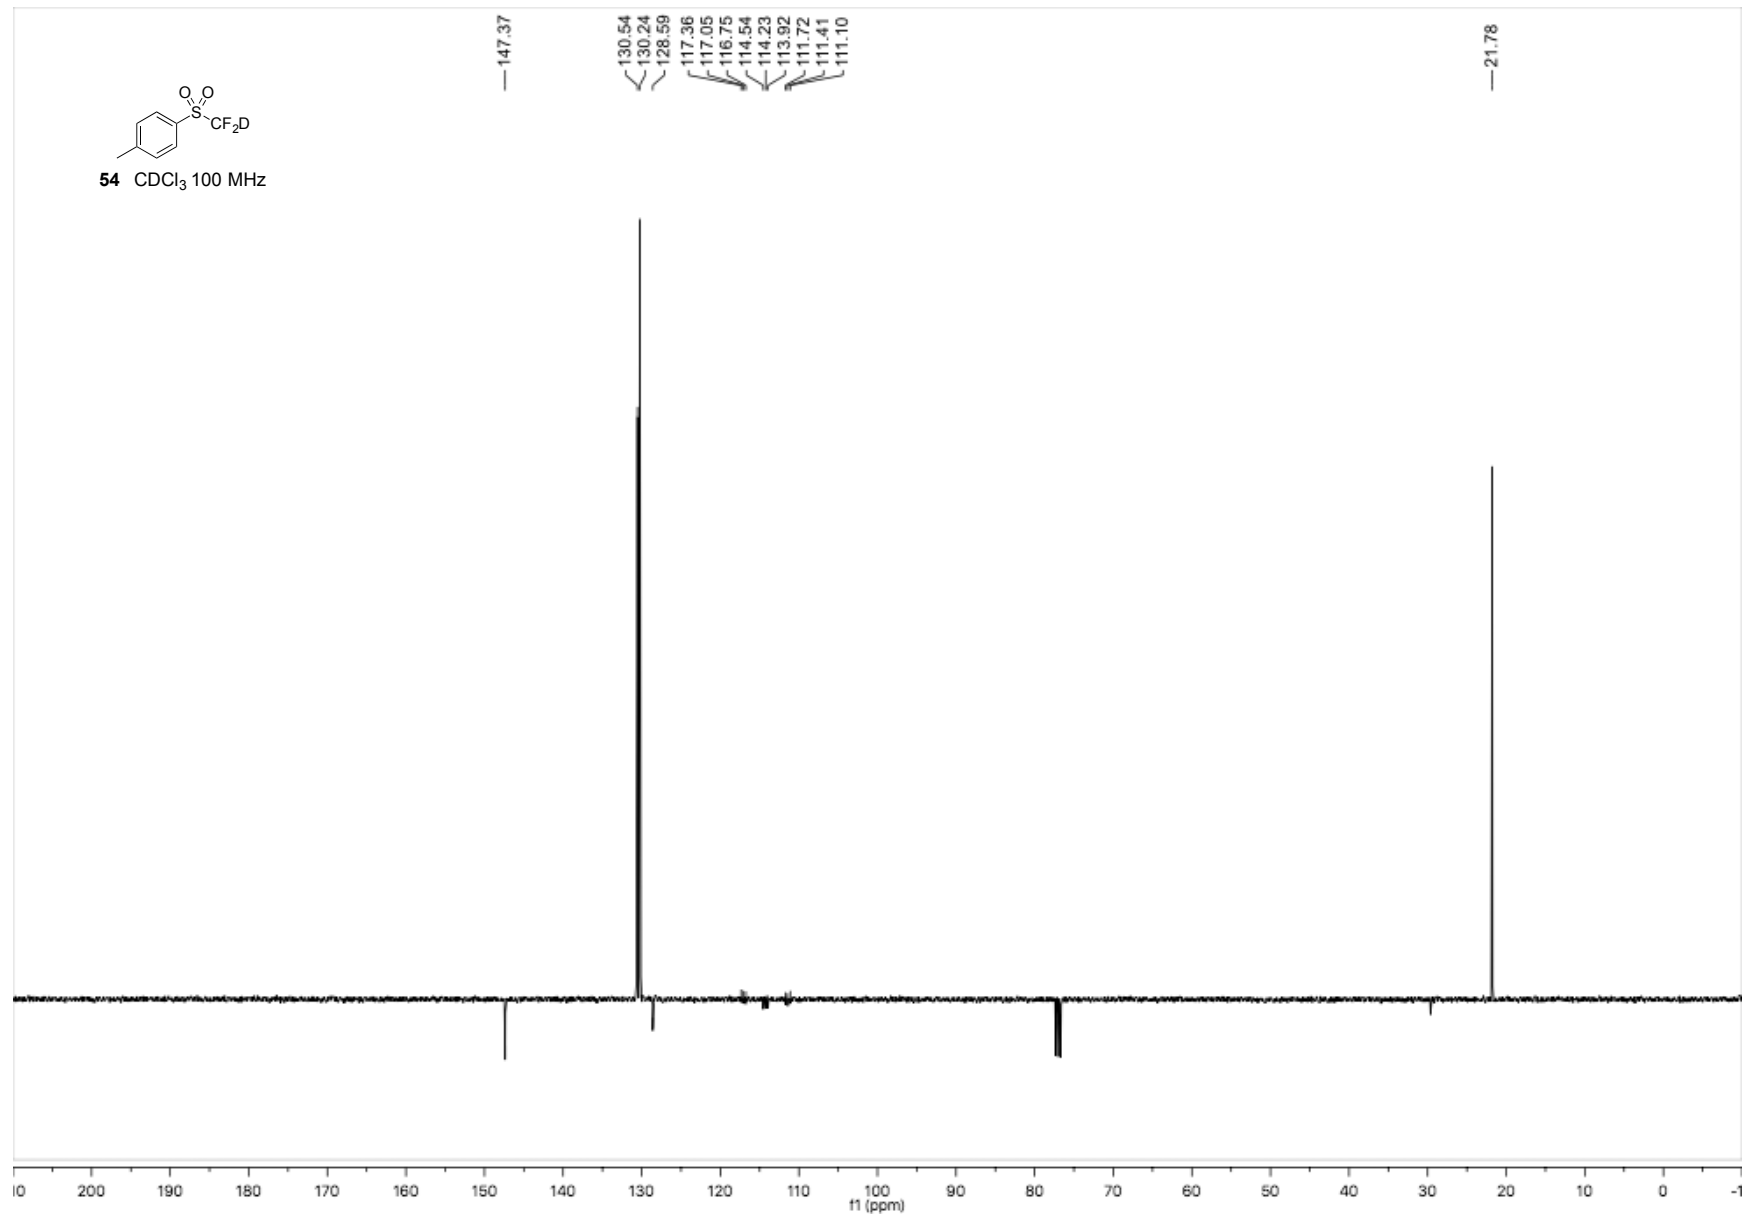

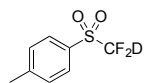

54 CDCl<sub>3</sub> 376 MHz

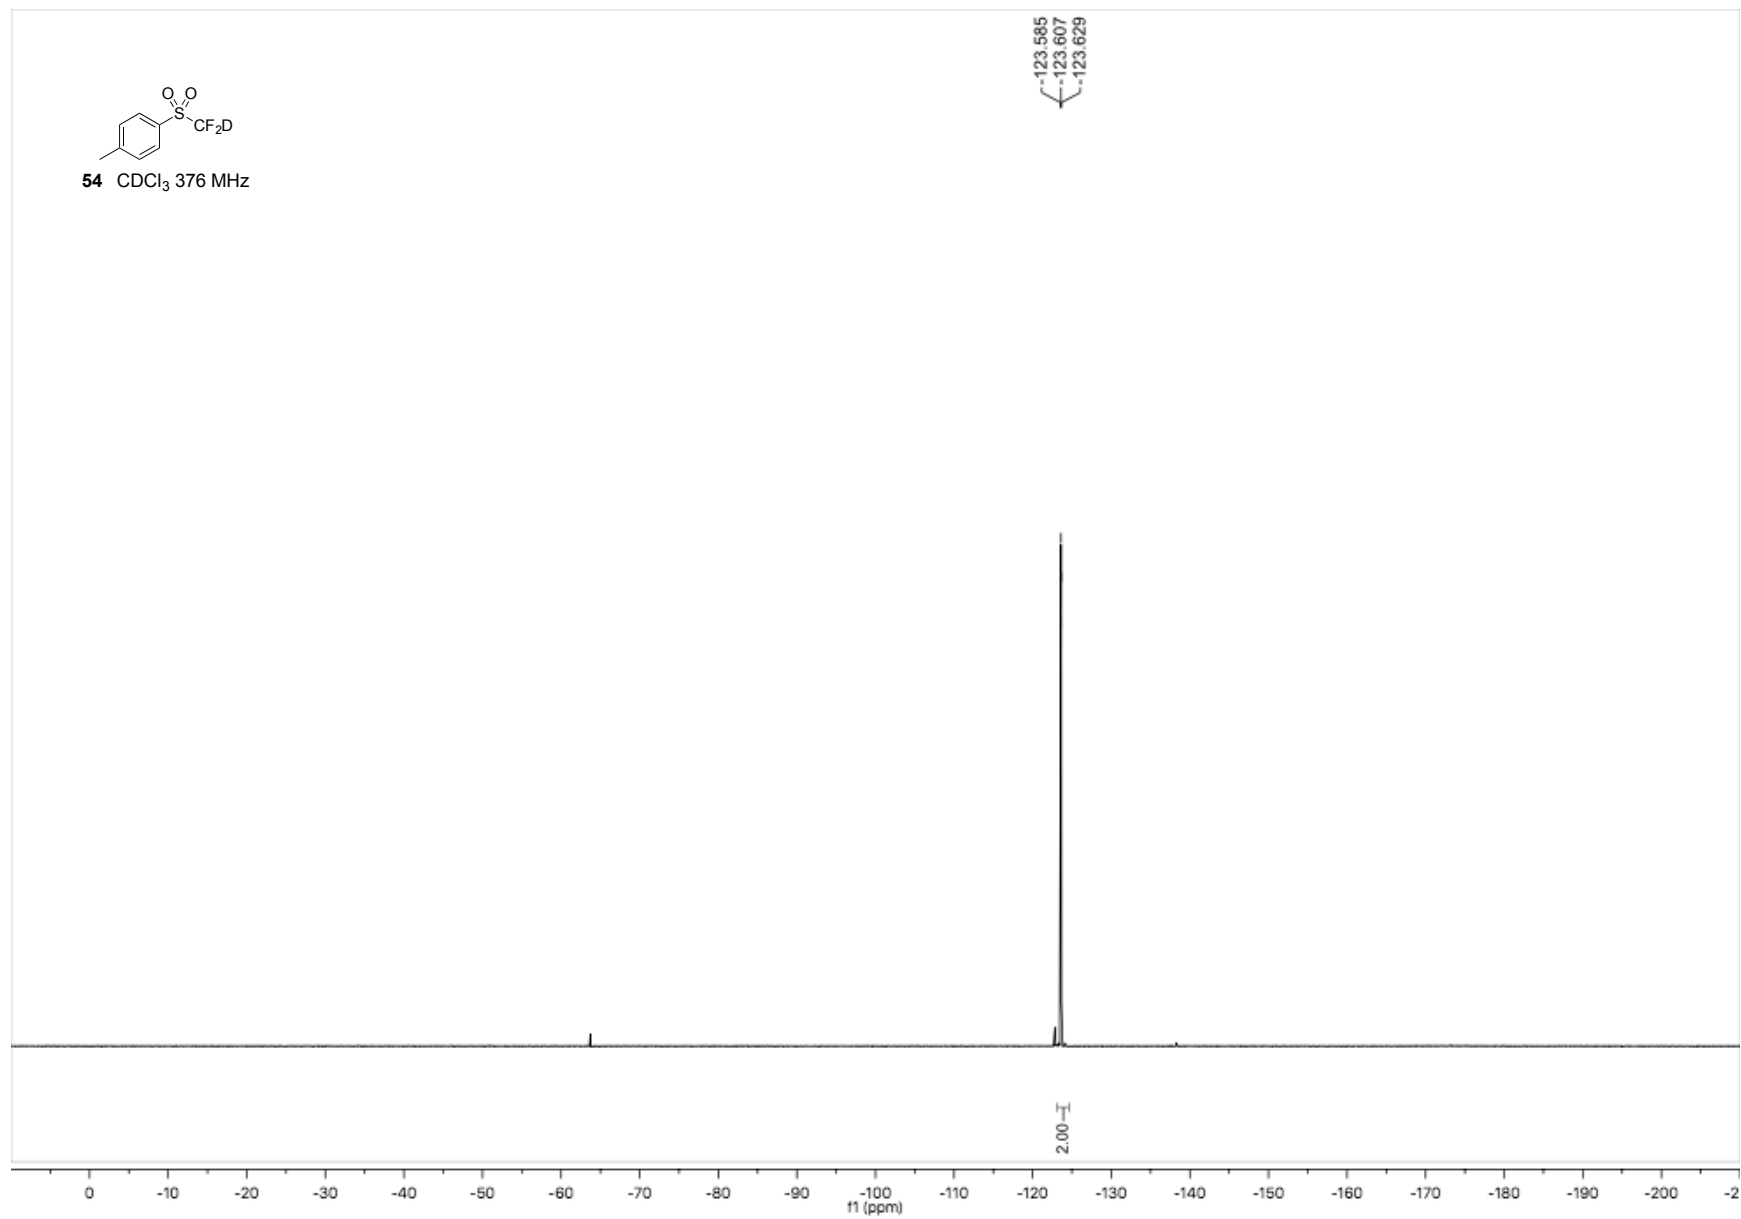

Supplement: NIHMS840376-supplement.pdf [file NIHMS840376-supplement.pdf]
